# Supplementary material for: EBF1 binds to EBNA2 and promotes the assembly of EBNA2 chromatin complexes in B cells
Source: PLoS Pathog. 2017 Oct 2;13(10):e1006664. doi: 10.1371/journal.ppat.1006664 (PMC5638620; doi:10.1371/journal.ppat.1006664)
Supplement: S1 Table — (XLSX) [file ppat.1006664.s010.xlsx]

## Sheet: MASTER
ID	DG75_estr/DG75_ctrl logFC	DG75_estr/DG75_ctrl adj.P.Val	SM224.9_estr/SM224.9_ctrl logFC	SM224.9_estr/SM224.9_ctrl adj.P.Val	SM224.9_ctrl/DG75_ctrl logFC	SM224.9_ctrl/DG75_ctrl adj.P.Val	SM224.9_estr/DG75_estr logFC	SM224.9_estr/DG75_estr adj.P.Val	SM295_estr/SM295_ctrl logFC	SM295_estr/SM295_ctrl adj.P.Val	SM296_estr/SM296_ctrl logFC	SM296_estr/SM296_ctrl adj.P.Val	SM296_ctrl/SM295_ctrl logFC	SM296_ctrl/SM295_ctrl adj.P.Val	SM296_estr/SM295_estr logFC	SM296_estr/SM295_estr adj.P.Val	SM295_ctrl/DG75_ctrl logFC	SM295_ctrl/DG75_ctrl adj.P.Val	SM296_ctrl/SM224.9_ctrl logFC	SM296_ctrl/SM224.9_ctrl adj.P.Val		ST 212 DG75 R1.CEL	ST 212 DG75 R2.CEL	ST265 DG75 R3.CEL	ST 212 DG75 + 24h ER R1.CEL	ST 212 DG75 + 24h ER R2.CEL	ST265 DG75 +24h ER R3.CEL	ST 212 SM295 D6 R1.CEL	ST 212 SM295 D6 R2.CEL	ST265 SM295 D6 R3.CEL	ST 212 SM295 D6 + 24h ER R1.CEL	ST 212 SM295 D6 + 24h ER R2.CEL	ST265 SM295 D6 +24h ER R3.CEL	ST224 SM224.9 R1.CEL	ST 241 SM224.9 R2.CEL	ST 265 SM224.9 R3.CEL	ST224 SM224.9 + 24h ER R1.CEL	ST 241 SM224.9 +24h ER R2.CEL	ST 265 SM224.9 +24h ER R3.CEL	ST224 SM296 D3 R1.CEL	ST 241 SM296 D3 R2.CEL	ST 265 SM296 D3 R3.CEL	ST224 SM296 D3 + 24h ER R1.CEL	ST 241 SM296 D3 +24h ER R2.CEL	ST 265 SM296 D3 +24h ER R3.CEL	accession	symbol	description	entrez
16996813	-0.0365666	0.975108	-0.0667306	0.950324	0.508053	0.0448106	0.477889	0.079264	-3.72217	7.18698e-13	-2.25394	1.12118e-08	1.06385	7.14784e-05	2.53208	1.53481e-10	-1.09114	5.41268e-05	-0.535343	0.109862		6.16217	6.17031	6.01216	5.901	5.95477	6.08102	6.15103	6.38528	6.03931	6.80077	7.02535	6.79481	6.76433	6.70409	6.60285	6.42534	6.30642	6.65896	11.5503	11.4571	11.2656	11.1384	11.0624	11.0434	NM_003803 // NM_019856 // ENST00000356443 // ENST00000261606 // BC116183 // ENST00000400569	MYOM1	myomesin 1, 185kDa	8736
16693844	-0.00760212	0.993618	-0.0166126	0.986104	0.373926	0.0530567	0.364915	0.0788013	-3.62923	2.69953e-14	-2.4979	4.64482e-11	0.161876	0.576707	1.2932	5.04086e-08	0.395785	0.0478166	0.183735	0.69775		10.6319	10.8618	10.9463	10.5688	10.7763	10.758	6.63248	6.62313	6.63654	6.91623	7.09243	7.0363	6.49967	6.41915	6.50217	6.27302	6.26087	6.32962	5.56017	5.64529	5.34035	5.70111	5.45441	5.58492	NM_001874 // NM_198320 // NM_001005502 // ENST00000338356 // AF368463	CPM	carboxypeptidase M	1368
16927850	0.127337	0.926141	0.0465877	0.978991	-1.70926	1.8242e-05	-1.79001	1.08332e-05	-3.37373	4.2782e-10	-0.93716	0.0197645	-3.43535	8.21956e-10	-0.998782	0.00179041	1.12419	0.00174065	-0.601904	0.281249		6.32431	6.31082	6.27401	6.2916	6.42022	6.30562	7.13255	7.199	7.46478	7.04963	7.53629	7.49811	11.7787	11.7618	11.7973	11.7028	11.619	11.6918	11.2483	11.0928	11.4514	11.2971	11.2052	11.4079	NM_006737 // AY789067 // ENST00000355608 // ENST00000326321	KIR3DL2 // LOC727787 // KIR3DL1	killer cell immunoglobulin-like receptor, three domains, long cytoplasmic tail, 2 // killer cell immunoglobulin-like receptor, three domains, long cytoplasmic tail, 2-like // killer cell immunoglobulin-like receptor, three domains, long cytoplasmic tail, 1	3812 // 727787 // 3811
16874533	0.0645584	0.943619	0.000734289	0.999127	0.099488	0.73105	0.0356639	0.946071	-3.28514	8.44066e-13	-2.30275	1.3955e-09	-0.100336	0.8176	0.882061	5.97633e-05	0.317615	0.249731	0.117791	0.887316		10.2184	10.0873	10.0456	10.2835	10.0696	10.0572	10.1967	10.1164	10.1543	7.06556	6.94893	7.00019	10.3789	10.4311	10.3193	10.297	10.3431	10.4025	10.3747	10.3598	10.3687	9.60618	9.70564	9.67129	NM_001184866 // NM_032738 // NM_001184867 // NM_001184873 // NM_001184870 // NM_001184872 // NM_001184871 // ENST00000236938 // AF531423 // BC006521 // AF426461 // AY358348 // AF329489 // AY091642 // AF329493 // AF329491 // AF329494 // ENST00000367959 // BX649184 // ENST00000367949 // ENST00000367953 // ENST00000309691 // ENST00000367957 // ENST00000350710 // ENST00000349527 // ENST00000367950 //…	FCRLA	Fc receptor-like A	84824
16933049	0.217984	0.676416	0.0372482	0.960055	0.729094	6.74418e-05	0.548359	0.00162915	-3.2361	2.61168e-14	-1.41212	2.35502e-08	-0.044249	0.906226	1.77972	8.70415e-11	0.61101	0.000462156	-0.162333	0.699188		5.71187	5.3691	5.07982	5.47627	5.20817	5.16986	10.6123	10.5809	10.6258	10.6266	10.3595	10.489	10.4271	10.5507	10.5495	10.4217	10.4603	10.5597	9.92232	9.87431	9.68114	9.82421	9.86038	9.80532
17097653	0.157744	0.915483	-0.0796803	0.964047	1.37622	0.000690234	1.13879	0.00470272	-3.16521	4.31133e-09	-0.606078	0.306486	-0.0491959	0.960172	2.50993	1.15173e-07	1.95702	1.09729e-05	0.531612	0.475065		9.79519	9.67014	9.73533	9.82774	9.71206	9.80045	5.61775	5.7978	6.10021	5.84688	6.05475	6.06521	9.68857	9.72583	9.72144	9.59485	9.73463	9.70063	9.73293	9.77411	9.66926	9.63876	9.67779	9.66158	NM_014399 // ENST00000262067 // AF100759 // ENST00000440020 // ENST00000466195	TSPAN13	tetraspanin 13	27075
16672946	0.0196569	0.9673	-0.0288973	0.950615	0.25933	0.0175744	0.210776	0.073852	-3.1509	1.08188e-16	-0.706704	8.98973e-07	0.211947	0.0694719	2.65614	4.53458e-16	0.0386962	0.876896	-0.00868674	0.99143		5.23668	5.01783	5.14175	5.07252	5.18887	5.03956	5.01114	4.95796	5.08092	9.72949	9.8078	9.84368	5.14666	5.38392	5.32219	5.2699	5.46168	5.22514	4.97366	5.17615	4.84107	7.08331	7.33674	6.86124	NM_004951 // ENST00000376414 // BC020752	GPR183	G protein-coupled receptor 183	1880
16854132	-0.188224	0.88363	-0.378247	0.734299	-0.114762	0.811584	-0.304786	0.576124	-3.09223	1.43647e-09	-1.39173	0.000499867	-0.907623	0.0114684	0.792876	0.0111698	0.896128	0.0126388	0.103267	0.946081		9.71024	9.79407	9.6173	9.69757	9.76241	9.62396	6.47094	6.32824	6.13195	7.03739	7.11793	7.26808	9.73527	9.8077	9.68372	9.59886	9.80229	9.65984	10.0593	10.0159	9.92835	9.87424	9.9006	9.8264	NM_001431 // NM_001135555 // NM_001135554 // ENST00000368128 // ENST00000337057 // ENST00000392427 // ENST00000445890 // AF027299 // AY047584 // BC034718 // AK295958 // AY512660 // AK295124 // ENST00000257986 // ENST00000425439 // ENST00000357633 // AK127088 // ENST00000368127 // AL050384 // ENST00000456097 // AJ251209 // ENST00000452150 // ENST00000368126 // CR936793 // AK307764	EPB41L2	erythrocyte membrane protein band 4.1-like 2	2037
17072159	0.125683	0.870879	-0.156025	0.820833	-0.285748	0.196965	-0.567457	0.00866846	-3.07333	8.63901e-13	0.107139	0.865135	-0.31047	0.218986	2.87	2.16915e-12	0.106506	0.810203	0.0817845	0.925894		10.3143	10.1205	10.2587	10.3561	10.2988	10.2319	9.81006	9.98872	9.99166	11.3896	11.459	11.643	6.58385	6.29279	6.45759	6.74894	6.26659	6.37328	6.42906	6.62226	6.52825	6.7081	6.70281	6.73404	NR_029379	LOC100132163	hypothetical LOC100132163	100132163
16927844	-0.0448003	0.965116	-0.0426905	0.969399	-0.53282	0.0267575	-0.53071	0.0342342	-3.036	6.6855e-12	-1.15497	4.35545e-05	-0.941809	0.000173036	0.939221	5.83917e-05	0.0687382	0.906712	-0.340251	0.421679		9.9445	9.90504	10.0508	10.0064	10.0304	9.84765	9.11315	9.07292	9.0752	7.82614	7.7531	7.89776	9.98604	10.035	10.0167	9.9314	9.94508	10.0784	10.2075	10.2893	10.2328	10.4092	10.427	10.4097
16976798	0.0566814	0.952836	0.0718801	0.938333	0.606521	0.00761595	0.621719	0.0074087	-3.01801	3.33584e-12	-1.23575	9.3987e-06	0.605335	0.00804481	2.3876	8.70415e-11	0.170086	0.664505	0.168901	0.804556		6.57407	6.74207	6.70327	6.78528	6.70882	6.66743	6.79042	7.27845	7.29123	10.7708	10.9472	10.7934	6.23301	6.10983	6.26973	6.17444	6.14588	6.48551	6.31013	6.34097	6.48826	6.10418	6.21661	6.2615	NM_001130716 // NM_016619 // NM_001130715 // ENST00000505406 // ENST00000311507 // ENST00000411416 // ENST00000426923 // BC012205 // ENST00000515389	PLAC8	placenta-specific 8	51316
16988011	0.190362	0.869474	-0.166781	0.878359	0.881773	0.00537787	0.52463	0.146837	-2.92463	6.00149e-10	-2.5704	3.48968e-08	0.0186408	0.982518	0.372874	0.2063	1.14741	0.000433466	0.284273	0.728841		6.12199	6.0751	6.04312	6.44945	5.9364	6.07737	9.30649	9.08411	9.11935	11.2116	10.8215	10.7723	6.01389	5.94463	6.03405	6.17352	5.96202	6.00387	5.99269	6.06479	5.81432	6.31517	6.06945	6.21192	NM_002460 // NM_001195286 // NR_036585 // ENST00000380956 // D78261 // ENST00000412334 // ENST00000443871 // ENST00000493114 // ENST00000495137	IRF4	interferon regulatory factor 4	3662
16784041	-0.0505472	0.97527	-0.0658097	0.966534	2.67115	3.37886e-08	2.65589	4.05223e-08	-2.86647	3.1253e-09	-0.461251	0.431886	-1.09404	0.00183861	1.31117	9.39837e-05	2.7358	2.13623e-08	-1.02939	0.0111842		8.41056	8.32353	8.46493	8.48626	8.2682	8.45406	5.70097	5.81166	5.75584	5.87288	5.98258	6.09785	6.38369	6.12366	6.25393	6.01459	6.11214	6.13794	6.33803	6.66003	6.45779	9.26929	9.31609	9.30728	NM_001024630 // NM_001015051 // NM_004348 // ENST00000371438 // ENST00000465038 // ENST00000352853 // BC108919 // ENST00000359524 // ENST00000483377 // ENST00000371432 // ENST00000478660 // ENST00000483243 // ENST00000473041	RUNX2	runt-related transcription factor 2	860
17125376	-0.228023	0.874896	-0.411729	0.741181	0.298965	0.516309	0.11526	0.89581	-2.83889	2.40007e-08	-1.1862	0.00738637	0.41672	0.452734	2.0694	1.85599e-06	0.058533	0.957049	0.176287	0.910603		6.42436	6.51386	6.63803	6.47387	6.61709	6.73422	9.06416	9.14041	9.28222	10.0254	9.76448	9.98134	6.65053	6.61665	6.77128	6.85595	6.77686	6.8878	6.67993	6.74585	6.57922	6.74179	6.56144	6.66802	NM_020992 // ENST00000329399 // U90878 // ENST00000477757 // ENST00000493949 // ENST00000490391 // ENST00000492511	PDLIM1	PDZ and LIM domain 1	9124
16927853	0.0397702	0.972591	0.0477315	0.967251	-0.651374	0.0112441	-0.643413	0.0147025	-2.78037	6.4733e-11	-1.03703	0.000353188	-1.25594	1.25617e-05	0.487399	0.0309392	0.254884	0.507474	-0.349682	0.465294		4.76299	4.81595	5.01914	4.91752	4.58944	4.8406	5.39439	5.67345	5.13212	9.47678	9.78153	9.68784	4.21206	4.12809	4.09245	4.54871	4.45765	4.33593	4.42095	4.76787	4.46472	4.58831	4.38015	4.77825
16927858	-0.0221762	0.983582	-0.00810018	0.994772	-0.655883	0.00337738	-0.641807	0.00476945	-2.77023	8.98775e-12	-1.13327	2.12151e-05	-1.15144	6.34566e-06	0.485511	0.0129875	0.153438	0.703324	-0.342124	0.356413		2.80274	2.68263	2.69575	2.48619	2.63983	2.61428	2.34697	2.82317	2.61421	8.3878	9.09978	8.58415	3.00362	2.73012	2.88432	2.76468	2.79673	2.68718	2.8416	2.48762	2.68157	3.22915	3.68386	3.44886
17118329	0.00285145	0.996547	0.02721	0.971827	-0.221035	0.194926	-0.196676	0.360027	-2.76465	1.03838e-13	0.094164	0.838128	-0.139006	0.571722	2.71981	8.09708e-14	0.0877749	0.79073	0.169803	0.652858		6.94105	6.66156	7.05728	7.23919	6.92039	7.14284	5.15483	5.17163	5.07225	9.91236	10.1144	10.0729	6.84014	6.32374	6.48754	6.3703	6.39387	6.33401	6.37859	6.23697	6.04046	9.30711	9.31413	9.5433	NM_002261 // NM_007333 // ENST00000396439 // ENST00000381903 // AF461157 // ENST00000381904	KLRC3	killer cell lectin-like receptor subfamily C, member 3	3823
16921478	-0.00674441	0.996716	0.0506019	0.980554	-0.622681	0.148498	-0.565334	0.279792	-2.74249	7.06081e-08	-1.2527	0.0068304	-0.481392	0.384873	1.0084	0.00615378	-0.0481667	0.967886	0.0931223	0.96301		6.29774	6.26073	6.41258	6.4509	6.1869	6.3241	6.09318	6.21046	6.133	9.23655	9.445	9.27378	6.44047	6.30912	6.34391	6.4226	6.28213	6.18032	5.98041	6.10639	6.12125	5.99864	6.20938	6.23108	NM_001105556 // NM_004848 // NM_001039477 // ENST00000373921 // ENST00000373925 // ENST00000373927 // AK303090 // ENST00000328928 // ENST00000456990 // ENST00000373919 // ENST00000442118 // ENST00000492877 // ENST00000466068 // ENST00000467258	C1orf38	chromosome 1 open reading frame 38	9473
16797358	0.215239	0.732459	0.0671129	0.936756	0.290599	0.186174	0.142473	0.69046	-2.73548	4.66852e-12	-0.558902	0.0186044	-0.0839986	0.840489	2.09258	1.92626e-10	0.732103	0.000673518	0.357505	0.276201		4.80298	4.72986	4.69751	4.8483	4.78231	5.02449	4.74906	4.7694	4.57518	8.35003	8.44495	8.37331	4.74807	4.64684	4.63039	4.70208	4.66824	4.66946	4.61108	4.33871	4.73969	4.69876	4.97499	5.02278	NM_001145271 // NM_014479 // NM_001145272 // ENST00000256412 // ENST00000380824 // ENST00000425940 // AK316322 // ENST00000520193	ADAMDEC1	ADAM-like, decysin 1	27299
16797583	0.4456	0.747868	-0.0483936	0.983501	0.606759	0.205323	0.112766	0.91336	-2.61913	4.52022e-07	-0.489042	0.581122	-0.115136	0.909739	2.01495	1.42931e-05	2.71757	9.8435e-07	1.99567	0.000202277		5.81374	5.88726	5.66647	5.85353	5.97202	5.48665	10.3992	10.6948	10.5671	9.49341	9.4447	9.53591	7.08388	7.3457	7.31851	6.80762	7.33207	6.9864	6.78362	7.00778	6.84887	7.00773	6.95503	6.96326
16789573	0.118126	0.859304	-0.131365	0.833461	-0.593607	0.00172131	-0.843098	4.42478e-05	-2.59728	1.77387e-12	-0.889574	5.20619e-05	-0.522723	0.00533036	1.18498	1.22348e-07	-0.262835	0.251388	-0.191951	0.662128		5.38552	5.63022	5.38049	5.40605	5.35704	5.22727	5.31909	5.56143	5.12296	5.24502	5.08173	5.2686	6.02029	5.96297	6.15888	5.69707	5.99398	6.01565	8.03165	7.6584	7.5049	10.0253	10.042	9.78361
16854137	-0.0748617	0.962735	-0.0276275	0.988866	-0.328803	0.446328	-0.281568	0.653848	-2.57056	5.15897e-08	-0.990177	0.0218612	-0.874188	0.0259802	0.706199	0.0356382	1.0541	0.00599106	0.508714	0.484051		8.78323	8.9021	9.21737	9.0414	9.11131	9.10894	4.86288	4.94462	4.74555	4.65482	4.72377	4.9939	7.72085	8.01634	7.71977	7.56823	7.84302	7.63853	7.87692	7.95	7.79981	5.66715	5.65718	5.54527
16841852	0.0365602	0.953451	-0.0221399	0.975795	0.209695	0.173477	0.150994	0.471465	-2.55932	8.06553e-14	-0.269447	0.173076	0.0804247	0.759665	2.3703	1.50373e-13	0.127515	0.592869	-0.00175494	0.998178		4.50982	4.44111	4.49766	4.91756	4.38187	4.30795	10.5175	10.501	10.553	10.8603	11.0973	10.9715	8.66626	8.87652	8.9629	8.12007	8.62391	8.91395	5.94489	6.14606	5.77037	5.74383	5.93708	6.03277
16874546	0.162088	0.926435	-0.0659655	0.976972	0.355545	0.499874	0.127491	0.901182	-2.5579	6.64276e-07	-1.4386	0.00456167	-0.263166	0.741914	0.856131	0.0337615	-0.265982	0.766878	-0.884693	0.174777		7.25985	7.06666	7.23706	6.98858	7.20587	7.2404	8.48447	8.72947	8.55084	9.96285	10.0084	9.98939	7.22037	7.22309	7.39393	7.48633	7.52008	7.42365	7.05565	7.22112	7.26211	7.09215	7.05312	6.94594	NM_014974 // ENST00000280886 // BC063313 // ENST00000381496 // ENST00000423550 // ENST00000381503 // ENST00000421992 // ENST00000434695	DIP2C	DIP2 disco-interacting protein 2 homolog C (Drosophila)	22982
16927869	-0.046765	0.967731	0.00127887	0.999061	-0.704885	0.00746098	-0.656841	0.0151438	-2.50257	4.1281e-10	-1.01355	0.000609561	-1.13641	5.87074e-05	0.35261	0.143088	0.0615832	0.927967	-0.369937	0.432406		8.66457	8.93174	9.02528	8.66115	8.82478	8.64579	5.62647	5.38788	5.06632	6.10963	6.16831	5.83536	9.67718	9.68706	9.89458	9.51187	9.71997	9.67824	9.93876	10.1637	9.99464	10.1265	10.3014	10.2101
16769945	0.382854	0.529036	-0.0578182	0.937072	0.600093	0.00118949	0.15942	0.563435	-2.45297	2.79276e-12	-0.652043	0.00131963	0.338158	0.0871727	2.13908	1.60703e-11	0.204523	0.417978	-0.0574119	0.941434		8.53295	8.32443	8.39628	8.59851	8.52769	8.42937	8.85001	8.98911	8.99297	10.9878	10.9447	11.0489	9.01776	8.89452	8.91007	8.96399	8.91491	8.95021	8.85707	8.93494	8.89288	8.801	8.81542	8.87051	NM_021109 // ENST00000380636 // ENST00000451311 // ENST00000380635 // AK055976 // ENST00000380638	TMSB4X	thymosin beta 4, X-linked	7114
17072093	0.129013	0.83639	-0.0105994	0.992182	0.521179	0.00458226	0.381567	0.0496303	-2.45254	3.05165e-12	-2.60475	1.6339e-11	-0.205705	0.40667	-0.357908	0.0262609	0.305652	0.140255	-0.421232	0.0746628		4.48222	4.59163	4.91342	4.75955	4.50236	4.86132	4.12197	4.4398	4.42159	9.98168	10.7496	10.7104	4.41294	4.70413	4.28135	4.33446	4.17964	4.36859	4.80594	4.77044	4.4934	5.27339	5.18787	4.91145	NM_001565 // ENST00000306602 // BC010954 // ENST00000399485	CXCL10	chemokine (C-X-C motif) ligand 10	3627
16796175	0.112875	0.874896	-0.0232484	0.980803	0.389245	0.0510753	0.253122	0.317724	-2.43753	9.84703e-12	-1.14805	3.63667e-06	-0.320849	0.154332	0.968631	3.82772e-06	0.310086	0.176722	-0.400009	0.140124		8.29646	7.89624	8.29563	8.14302	8.28899	8.31966	9.21647	9.17524	9.25086	9.12587	9.06412	9.09131	4.66398	4.56018	4.57761	4.9562	4.76808	5.26444	4.74885	4.98021	5.09747	5.31347	4.98768	5.22583	NM_138441 // ENST00000370315 // ENST00000370318 // BC012928 // ENST00000393269 // ENST00000459924	C6orf150	chromosome 6 open reading frame 150	115004
16796202	0.65628	0.685868	0.259738	0.890987	0.53276	0.372351	0.136219	0.911942	-2.38562	1.32877e-05	-1.65447	0.0058175	-0.150653	0.898793	0.580492	0.258649	0.688312	0.323133	0.00489834	0.998905		6.99617	7.13421	7.02062	6.73464	7.00446	7.10552	7.12468	7.09004	6.99398	9.94223	10.1833	10.1944	7.02773	6.83253	6.95438	6.88348	7.0217	6.92443	6.70823	6.8471	6.85513	6.98213	6.69024	6.99227	NM_002558 // ENST00000225538 // BC027949	P2RX1	purinergic receptor P2X, ligand-gated ion channel, 1	5023
16801602	0.556806	0.61997	-0.0770486	0.958417	1.85939	2.56545e-06	1.22553	0.00044136	-2.37884	2.22982e-08	-0.646925	0.13047	-1.80321	3.30243e-06	-0.0712935	0.862983	2.57531	2.48389e-08	-1.08729	0.00439971		8.5033	8.38851	8.6176	8.77752	8.47769	8.50827	5.70609	5.85044	5.69025	6.68461	6.65955	6.56491	5.44635	5.68683	5.4692	5.19125	4.93498	5.08844	6.40911	6.15279	6.06244	6.37298	6.23988	6.35229	NM_016010 // ENST00000263849 // AF151820 // ENST00000450609 // ENST00000521176 // ENST00000521873	FAM164A	family with sequence similarity 164, member A	51101
16863753	0.145554	0.769013	-0.000565221	0.999127	-0.375319	0.0192385	-0.521438	0.00154468	-2.31138	9.42523e-13	-0.978829	1.80707e-06	-0.0742686	0.807036	1.25828	5.86392e-09	-0.310636	0.0690309	-0.00958607	0.993333		3.83614	3.90909	3.95766	3.9583	4.05043	3.42921	8.51726	8.43424	8.20512	8.94007	8.89344	8.7354	3.78259	3.9721	4.08009	3.7068	3.88584	3.98243	4.13924	4.49026	3.94099	3.93624	3.95801	4.2585	NR_028342 // BC033326 // ENST00000431174	LOC285501	hypothetical LOC285501	285501
16751190	0.095272	0.85794	-0.0703146	0.894177	0.248433	0.105296	0.0828464	0.762013	-2.30569	4.22145e-13	-0.92001	1.73939e-06	-0.427673	0.00447721	0.958013	1.08978e-07	0.911459	7.45929e-07	0.235353	0.339308		4.77147	4.72338	4.88117	4.89698	4.80083	4.65673	7.72408	8.0023	7.84631	8.45117	8.59415	8.59157	6.80901	6.91035	6.75434	6.47554	6.60686	6.65081	4.87541	5.2037	4.98206	4.83965	5.29133	5.19336
16891529	0.260277	0.748551	-0.312761	0.711438	-0.568753	0.0344022	-1.14179	8.2348e-05	-2.2551	2.16395e-09	-0.487502	0.171948	-1.27684	1.67468e-05	0.49076	0.0370747	0.473641	0.107671	-0.234444	0.73879		6.99038	6.83621	6.67952	6.67653	7.02558	6.78384	9.89315	10.1758	10.0779	9.33324	9.46628	9.19234	7.75198	7.77937	7.65084	7.56828	7.64142	7.64031	7.25747	7.34837	7.44112	7.6261	7.47108	7.55082	NM_020397 // NM_153498 // ENST00000378845 // ENST00000378847 // AK289393 // ENST00000487696	CAMK1D	calcium/calmodulin-dependent protein kinase ID	57118
16890817	0.2441	0.85382	0.152614	0.914172	0.0639913	0.9116	-0.0274941	0.976475	-2.18047	3.95414e-07	-1.70731	8.51668e-05	0.466872	0.335369	0.940031	0.00472968	-0.561158	0.208603	-0.158277	0.915655		10.2916	10.3041	10.1404	10.2243	10.2167	10.1534	11.0632	11.0722	10.9598	11.2133	10.9417	10.9748	9.99652	10.0949	10.074	9.8797	10.1248	10.0654	8.87288	8.9542	9.05666	8.55325	8.60198	8.64948	NM_001025077 // NM_006561 // NM_001025076 // NM_001083591 // ENST00000379261 // ENST00000450189 // ENST00000427450 // ENST00000354440 // ENST00000416382 // ENST00000315874 // ENST00000399850 // AF090693 // ENST00000354897 // ENST00000379259 // ENST00000417956	CELF2	CUGBP, Elav-like family member 2	10659
16944618	0.0216248	0.98679	-0.0377089	0.976632	0.533654	0.0422805	0.474321	0.0989561	-2.1663	2.69095e-09	-1.098	0.000207883	1.30244	9.69754e-06	2.37075	7.08191e-10	-0.817018	0.00186017	-0.0482276	0.971145		11.3128	11.2439	11.0964	11.223	11.2304	11.1361	11.1444	11.1323	11.1244	9.5722	9.50877	9.53485	11.2932	11.0802	11.0863	11.2558	11.1465	11.2317	11.486	11.4596	11.5148	11.6298	11.502	11.6293	NM_001165 // NM_182962 // ENST00000263464 // ENST00000393201 // ENST00000439863 // AF070674	BIRC3	baculoviral IAP repeat-containing 3	330
16722455	0.283111	0.756221	-0.200005	0.844748	0.878019	0.0034536	0.394903	0.29708	-2.12695	2.42137e-08	-0.452853	0.318076	0.33033	0.416189	2.00443	5.63551e-08	0.556917	0.0847479	0.00922857	0.997027		10.4352	10.3435	10.361	10.5695	10.4492	10.4355	9.57511	9.64702	9.48123	11.9031	11.9173	11.8012	10.5921	10.3882	10.4207	10.4843	10.5175	10.5047	9.86487	10.0883	9.8013	9.61004	9.57389	9.64243	NM_001778 // ENST00000368046 // BC016182 // ENST00000368045	CD48	CD48 molecule	962
16738701	0.114421	0.866519	0.0655818	0.929848	-0.238408	0.229368	-0.287247	0.194585	-2.08509	4.47977e-11	-2.1452	3.37877e-10	0.282542	0.201242	0.222436	0.202813	-0.65341	0.000658355	-0.13246	0.822658		10.731	10.5766	10.6416	10.5968	10.8731	10.7052	9.37794	9.68739	9.66316	9.24421	9.60106	9.60394	11.5408	11.3809	11.5791	11.2656	11.4509	11.6233	12.0296	11.8378	11.8736	12.8975	12.8596	12.8366	NM_020661 // ENST00000229335 // AY541058	AICDA	activation-induced cytidine deaminase	57379
16945682	0.0506319	0.934692	-0.0692115	0.899653	0.352779	0.0219991	0.232935	0.201976	-2.01648	4.04724e-12	-1.2996	1.92908e-08	0.288167	0.0837125	1.00504	8.01077e-08	-0.946498	6.27037e-07	-1.01111	1.09177e-06		9.38371	9.33048	9.39883	9.49517	9.64466	9.62713	9.8344	10.0131	10.0985	6.59383	6.63052	7.0134	9.90816	10.2371	10.155	10.1154	10.0607	10.2359	9.92237	9.98736	9.90356	8.58811	8.52376	8.46505	NM_013378 // ENST00000248948 // AY359000 // ENST00000405618 // ENST00000398466	VPREB3	pre-B lymphocyte 3	29802
16823493	0.0703532	0.941522	0.00729727	0.995599	-0.125193	0.67482	-0.188249	0.623323	-2.01101	2.35684e-09	-0.295696	0.481818	-0.160816	0.686423	1.5545	8.9613e-08	0.041095	0.95051	0.00547251	0.99707		8.18435	8.06639	8.14825	8.36113	8.17771	8.08343	7.49069	7.86279	7.84235	10.7139	11.0971	11.0295	7.84671	7.74077	7.83256	7.87307	7.43314	7.5998	7.3779	7.24709	7.35168	7.50329	7.35691	7.39662	NM_001838 // ENST00000246657 // BC035343	CCR7	chemokine (C-C motif) receptor 7	1236
17072144	0.0535725	0.907678	-0.0447164	0.925588	0.0154527	0.936398	-0.0828362	0.694344	-1.99759	1.98736e-13	0.0650063	0.858844	0.0402334	0.876322	2.10283	5.99302e-14	0.075014	0.752003	0.0997946	0.774754		9.99202	10.0074	9.82553	9.9741	9.92944	9.89863	10.3972	10.3622	10.253	6.85599	6.61157	6.65709	10.2358	10.3557	10.3553	10.2187	10.3708	10.3075	10.6566	10.4229	10.4184	8.3611	7.8755	7.76766	NM_002249 // NM_170782 // ENST00000271915 // ENST00000361147 // BC042147 // ENST00000358505	KCNN3	potassium intermediate/small conductance calcium-activated channel, subfamily N, member 3	3782
16941998	0.0856362	0.875121	-0.0170141	0.981824	0.249904	0.103716	0.147253	0.496925	-1.99012	3.41499e-12	-0.783472	1.52279e-05	-0.140203	0.521088	1.06644	2.481e-08	0.172733	0.401086	-0.217374	0.409909		4.96582	5.12312	5.12489	5.31075	5.46959	5.33363	3.53551	3.55229	3.50317	3.80244	3.50893	3.78641	4.58983	4.62313	4.6221	4.55864	4.40468	4.44151	7.11587	6.79352	6.74711	6.0085	6.00881	5.66976
17118411	0.291786	0.798897	-0.446742	0.69893	1.48682	0.000109419	0.748287	0.0506161	-1.98189	8.20108e-07	-1.36352	0.000738231	1.78642	1.07633e-05	2.40479	6.19091e-08	0.504406	0.255816	0.804008	0.0890425		9.12631	8.96555	8.95861	9.21964	9.12961	9.07533	6.66541	6.42279	6.67768	6.51051	6.37051	6.34696	9.88168	10.0692	9.93557	9.59834	10.0277	9.91992	9.14257	9.1469	9.12492	9.3815	9.29744	9.19411	NM_020453 // ENST00000273859 // BC131535 // ENST00000434825 // ENST00000503288	ATP10D	ATPase, class V, type 10D	57205
17118415	0.291786	0.798897	-0.446742	0.69893	1.48682	0.000109419	0.748287	0.0506161	-1.98189	8.20108e-07	-1.36352	0.000738231	1.78642	1.07633e-05	2.40479	6.19091e-08	0.504406	0.255816	0.804008	0.0890425		8.30147	8.44251	8.37261	8.32129	8.38756	8.40263	8.04568	8.15084	8.00992	10.542	10.446	10.3051	8.61744	8.63495	8.6384	8.45316	8.63414	8.70518	8.25564	8.38154	8.37713	9.55313	9.38404	9.33986	NM_007360 // NM_013431 // ENST00000309384 // AK226161 // ENST00000396451 // AJ001683	KLRK1 // KLRC4	killer cell lectin-like receptor subfamily K, member 1 // killer cell lectin-like receptor subfamily C, member 4	22914 // 8302
16864518	0.0705633	0.873896	-0.0400483	0.93446	-0.201989	0.103351	-0.3126	0.0118995	-1.97824	1.83526e-13	-0.697048	4.30337e-06	-0.398466	0.00116097	0.882725	1.74081e-08	0.111047	0.557549	-0.0854302	0.824328		10.0457	9.99629	10.099	10.138	10.0966	10.1371	8.88785	8.86337	8.92963	10.8745	10.9988	11.063	10.1412	10.0759	10.2482	10.0624	10.102	10.2438	9.86605	9.70302	9.65576	10.2571	10.251	10.2773	NM_018639 // ENST00000315436 // AF163324 // ENST00000441406	WSB2	WD repeat and SOCS box-containing 2	55884
16670185	0.261357	0.82366	-0.00141142	0.999061	1.2803	0.000490412	1.01754	0.00506186	-1.96947	7.26093e-07	0.0314347	0.985236	0.914045	0.0107403	2.91495	3.13951e-09	1.3083	0.000372758	0.942044	0.0278939		6.96923	7.05932	6.75214	7.04372	6.90059	6.85659	6.56395	6.25611	6.15964	10.3076	10.7017	10.432	6.70408	7.13814	6.92314	6.73603	6.92827	6.88373	6.99487	7.06001	6.86052	10.191	10.6377	10.3464	NM_203487 // NM_020403 // ENST00000377865 // ENST00000456367 // ENST00000328454 // BX537422 // ENST00000377861	PCDH9	protocadherin 9	5101
17121902	-0.18921	0.842939	0.0898121	0.93604	-0.522053	0.0648737	-0.243031	0.567156	-1.94894	3.14455e-08	-1.26641	8.54408e-05	-0.466126	0.139453	0.2164	0.443879	0.272246	0.518535	0.328173	0.573606		4.68773	4.59255	4.99617	4.79669	5.10419	4.7516	4.68389	4.89165	5.14489	5.05642	5.41939	5.34586	5.92264	5.45798	5.55592	5.7313	5.67793	5.3789	9.56098	8.99657	8.94685	10.3245	10.4766	10.2453	NM_173536 // ENST00000295452 // AK299884	GABRG1	gamma-aminobutyric acid (GABA) A receptor, gamma 1	2565
16985329	0.111977	0.803983	-0.103455	0.823664	-0.0643445	0.722431	-0.279777	0.065628	-1.93535	2.29193e-12	-0.368407	0.0211764	0.105458	0.640003	1.6724	1.51711e-11	-0.194285	0.267571	-0.0244821	0.973447		4.93305	5.46293	5.13437	5.16132	5.22995	4.96486	5.29032	5.31677	5.24859	8.73504	9.01562	8.97399	5.37553	5.34838	5.33935	5.33505	5.35314	5.50799	5.68984	5.58816	5.34031	5.32616	5.54105	5.216	NM_003008 // ENST00000372769 // M81652	SEMG2	semenogelin II	6407
16902809	0.260037	0.661701	-0.0834765	0.90393	1.0079	5.65917e-06	0.664382	0.000845711	-1.92989	1.83135e-10	-1.35512	2.57217e-07	0.409773	0.0404332	0.984541	2.13254e-06	1.12328	1.25309e-06	0.525157	0.021557		8.82328	8.86855	8.72603	8.92512	8.79885	8.88727	8.6212	8.54822	8.54932	10.3865	10.3494	10.4538	8.7227	8.80619	8.70942	8.65014	8.80431	8.81621	8.68928	8.69302	8.74719	8.96887	9.03424	8.93603	NM_014604 // NM_002561 // NM_175080 // NM_175081 // ENST00000225525 // ENST00000225328 // ENST00000345901 // ENST00000440619 // AF028823 // BC023980 // AF234997 // AF277318 // AF016709 // BC039015 // AK290889 // AF070573 // DQ234349 // U49395 // U49396 // AK293610 // AK001327 // ENST00000435558 // ENST00000381833 // AK092966 // BC008319	TAX1BP3 // P2RX5	Tax1 (human T-cell leukemia virus type I) binding protein 3 // purinergic receptor P2X, ligand-gated ion channel, 5	30851 // 5026
16885625	-0.0250248	0.982367	-0.00784891	0.994772	0.557694	0.0180077	0.57487	0.0176453	-1.87129	4.94668e-09	-1.23024	1.51209e-05	0.202345	0.567631	0.843399	0.000159792	0.789322	0.000989528	0.433973	0.2086		6.20598	6.00534	6.15399	6.47795	6.45491	6.31506	4.91757	5.14828	4.93037	4.94294	4.90827	4.66787	6.29042	6.14785	5.77278	5.98927	6.00654	6.38768	8.52234	8.36117	7.96626	8.94082	9.13234	9.08884	NR_033766 // NR_033767 // NM_014491 // NM_148898 // NM_148900 // NM_001172766 // NM_148899 // NM_001172767 // ENST00000393500 // ENST00000403559 // ENST00000408937 // ENST00000350908 // ENST00000393494 // AY144615 // BC126104 // BC143866 // AK296957 // BC143867 // AF337817 // DQ778626 // AF467257 // AF086040 // ENST00000441290 // ENST00000393489 // ENST00000412402 // ENST00000393491 // ENST000004…	FOXP2	forkhead box P2	93986
17110586	0.0475809	0.922068	7.99218e-05	0.999811	-0.00304755	0.988653	-0.0505486	0.846161	-1.86619	7.80236e-13	-0.268934	0.0847959	-0.0287443	0.921991	1.56851	8.58541e-12	-0.112254	0.578446	-0.13795	0.626662		7.49029	7.92756	7.83887	7.76451	8.07739	8.05365	5.4656	5.34466	5.91503	5.12274	5.07441	5.28085	9.34487	9.06094	9.36344	8.93704	9.09252	9.1705	10.1929	9.90303	9.82756	9.37835	9.29048	9.30715	NM_138573 // ENST00000394907 // BX538100 // ENST00000461391 // ENST00000472094 // ENST00000498750	NRG4	neuregulin 4	145957
16656385	0.609689	0.833404	0.56998	0.846157	0.418622	0.69971	0.378913	0.824725	-1.86563	0.0122321	-0.337455	0.905301	-0.185025	0.92629	1.34315	0.0800336	1.06428	0.343052	0.460632	0.882829		5.60225	5.49663	5.40506	5.56136	5.44469	5.3212	7.03658	7.43781	7.71418	9.58722	10.2492	10.3079	5.38785	5.5332	5.45253	5.56576	5.26764	5.39055	4.86097	4.74792	5.16824	5.25028	5.09144	4.9697	NM_000732 // NM_001040651 // ENST00000300692 // ENST00000392884 // BC070321	CD3D	CD3d molecule, delta (CD3-TCR complex)	915
16722445	0.142734	0.796462	-0.0425641	0.954814	0.620449	0.000513987	0.435151	0.0141352	-1.86524	6.66064e-11	-0.333201	0.135493	0.245406	0.243341	1.77744	1.2003e-10	0.470781	0.00676234	0.0957381	0.877481		6.95383	6.55203	7.08172	6.71014	6.4087	6.51941	7.7005	7.65632	7.53898	7.60686	7.73458	7.68685	10.1809	9.9954	10.1642	10.1304	10.0865	10.1557	8.85499	9.16261	8.99657	8.84962	9.06341	8.89458	NM_005330 // ENST00000292896 // ENST00000380237 // BC015537 // ENST00000396895	HBE1	hemoglobin, epsilon 1	3046
16848793	0.0537376	0.89919	-0.150284	0.681109	0.0946731	0.467554	-0.109348	0.511795	-1.84732	1.98736e-13	-0.416224	0.00111052	-0.305399	0.0078719	1.1257	2.17907e-10	0.294543	0.0105815	-0.105529	0.716734		10.6758	10.7942	10.6485	10.7293	10.8112	10.7387	10.7778	10.7958	10.77	8.80108	8.7636	8.78607	10.889	10.5818	10.694	10.7264	10.6555	10.6488	10.8686	10.805	10.7906	11.0402	10.7803	10.8387	NM_022783 // ENST00000286234 // BC012040 // ENST00000518057	DEPDC6	DEP domain containing 6	64798
16807324	-0.0292271	0.955687	-0.116813	0.769312	0.215603	0.0903003	0.128017	0.467437	-1.83829	7.43567e-13	-1.0564	1.92908e-08	-0.368862	0.00323433	0.413031	0.000364371	0.40673	0.00130548	-0.177735	0.420941		10.1324	9.82031	9.63872	10.0605	9.97419	9.91201	10.9339	11.0085	10.975	12.7784	12.6751	12.5662	10.874	10.5406	10.8141	10.64	10.6072	10.753	10.2977	10.4113	10.4074	9.78156	9.79365	9.84395	NM_004000 // NM_001025197 // NM_001025199 // ENST00000369748 // ENST00000369744 // ENST00000419203 // U58514 // ENST00000466741 // ENST00000497587 // ENST00000486561 // ENST00000474304 // ENST00000477185 // ENST00000467038 // ENST00000497220	CHI3L2	chitinase 3-like 2	1117
16757178	0.241445	0.74461	-0.140063	0.869175	0.928631	0.000271769	0.547122	0.0319611	-1.83648	1.09337e-08	-0.342146	0.387052	-0.31858	0.302466	1.17576	4.95767e-06	1.24914	7.69743e-06	0.00193278	0.99892		8.52934	8.63297	8.44447	8.48544	8.61329	8.56391	6.39156	6.12478	5.84578	11.0341	11.532	11.6058	6.91833	7.36929	7.2736	6.68369	7.1822	7.31377	7.10565	7.49186	7.60954	7.25855	7.55855	7.42144	NM_052939 // ENST00000368184 // AK301257 // ENST00000368186 // ENST00000292392 // ENST00000392274 // ENST00000480682 // ENST00000492769 // ENST00000485028 // ENST00000494724 // ENST00000477837 // ENST00000473231 // ENST00000468507 // ENST00000496769	FCRL3	Fc receptor-like 3	115352
16979917	0.046685	0.96085	-0.0491453	0.960795	0.0760334	0.803053	-0.0197969	0.972207	-1.82635	4.14216e-09	-0.211996	0.656997	0.379483	0.139083	1.99383	1.17662e-09	-0.137192	0.753458	0.166258	0.811041		11.0482	11.0971	10.9638	11.1157	11.021	11.0822	11.1526	11.2086	11.1305	8.80492	8.57264	8.43617	11.102	11.3854	11.2508	11.1399	11.2473	11.2846	11.0857	11.35	11.2973	10.9817	10.9562	10.9867	NM_178836 // ENST00000321560 // BC031263 // ENST00000427497	PLD6	phospholipase D family, member 6	201164
16750792	0.0828308	0.940934	-0.132404	0.892973	1.0991	0.000189637	0.883868	0.00206219	-1.81457	8.76891e-08	0.173233	0.820767	0.464671	0.142953	2.45248	1.23131e-09	0.38556	0.265963	-0.248871	0.732055		4.91862	5.13264	5.08224	4.86872	4.94323	4.95287	5.05996	4.95086	4.96638	8.86313	9.7275	9.63616	5.08768	5.00334	4.96737	4.82334	5.18732	4.86585	4.93951	5.09294	4.88147	5.22061	4.98348	5.12768
16987125	-0.00131679	0.998401	-0.155378	0.722022	-0.156704	0.293223	-0.310765	0.0311046	-1.80972	4.16084e-12	-0.217837	0.289553	0.221431	0.162273	1.81332	3.55489e-12	-0.250495	0.0971632	0.12764	0.716734		10.3112	10.3918	10.447	10.3012	10.4959	10.3615	10.4893	10.4666	10.4575	7.86637	7.62037	7.63265	10.315	10.0247	10.1472	10.2918	10.286	9.99068	10.3519	10.4154	10.229	10.5788	10.3794	10.3206	XR_108881	LOC100506966	hypothetical LOC100506966	100506966
16654585	-0.136703	0.951989	-0.378846	0.830222	-0.13986	0.852621	-0.382004	0.665704	-1.80768	0.00025357	-0.187108	0.919289	0.0832912	0.94829	1.70387	0.000519459	-0.615102	0.39958	-0.39195	0.80966		7.11921	7.04958	6.98318	7.38874	7.2211	7.20296	9.72064	10.1522	9.81481	9.94855	9.90651	9.72012	7.90135	7.84827	7.87239	7.84853	7.71532	7.76879	7.69806	7.81582	7.68372	7.67897	7.98579	7.83418	NM_000633 // NM_000657 // ENST00000398117 // ENST00000333681 // ENST00000444484 // M13994	BCL2	B-cell CLL/lymphoma 2	596
17057413	0.0240255	0.977868	0.064944	0.932121	-0.0706184	0.777651	-0.0296999	0.946449	-1.80668	3.96946e-10	-0.503966	0.0186044	-0.176733	0.522972	1.12599	3.00758e-07	-0.0976804	0.804143	-0.203795	0.630733		8.05906	8.30232	8.29957	8.53518	8.47083	8.59582	7.24981	7.22606	7.27647	5.47482	5.30984	5.74876	7.87811	7.96034	7.65595	7.50194	7.96848	7.73875	7.33875	7.25731	7.12362	9.18785	8.8468	8.83376	NM_001004343 // ENST00000357246 // AF276659	MAP1LC3C	microtubule-associated protein 1 light chain 3 gamma	440738
16797389	0.194535	0.886688	-0.226892	0.860058	1.53298	0.000119854	1.11155	0.00380652	-1.79739	4.74702e-06	-0.281981	0.754646	1.51595	0.000127966	3.03135	3.93256e-09	1.75268	2.34621e-05	1.73565	0.000105679		10.8137	10.6005	10.7413	10.6559	10.6142	10.6683	11.1577	11.1186	11.139	11.6666	11.6583	11.68	10.5143	10.262	10.4292	10.3754	10.2512	10.3604	10.4124	10.3245	10.2851	9.85718	9.90336	9.81855	NM_001242 // ENST00000266557 // BC012160	CD27	CD27 molecule	939
17072669	0.152926	0.808239	0.0687505	0.92936	0.159249	0.476889	0.0750739	0.853072	-1.79682	6.51363e-10	-0.337286	0.214513	0.0517195	0.905339	1.51125	7.56547e-09	0.222848	0.408115	0.115319	0.867834		4.42816	4.89573	4.52659	4.28801	4.66923	4.43341	8.42253	7.99974	8.03405	10.2383	9.99279	9.47677	4.49027	4.5671	4.61536	4.60857	4.51491	4.51491	3.96776	4.41375	4.52207	4.74784	4.90139	4.24116	NR_036586	LOC400958	hypothetical LOC400958	400958
16737577	0.0558067	0.955804	0.109231	0.898361	1.97798	1.0552e-08	2.0314	8.26123e-09	-1.79025	1.11472e-08	-0.0422209	0.963838	-1.72378	5.82651e-08	0.0242463	0.939557	1.97802	9.95682e-09	-1.72374	2.86466e-07		4.23291	4.06213	3.95357	4.42166	4.12472	4.46858	4.23973	3.80412	4.09497	7.66707	7.7009	7.53229	3.73234	3.84039	4.07942	3.67719	4.1222	3.98096	3.6128	3.8303	3.79133	4.10354	4.22635	4.07075
17075804	0.0510414	0.971707	-0.16501	0.882364	0.957655	0.00296474	0.741604	0.0257468	-1.78219	6.91221e-07	-1.22814	0.000628399	0.580838	0.0986233	1.13488	0.000179406	0.552237	0.12103	0.17542	0.880082		10.2499	10.2745	10.3581	10.4009	10.4195	10.4463	8.44844	8.67082	8.48724	7.79156	7.8091	7.67567	10.2205	10.1525	10.2611	9.95883	10.1167	10.311	10.4204	10.3661	10.3286	10.0729	9.86224	10.0874	NM_004099 // NM_198194 // ENST00000286713 // ENST00000347359 // AK304449 // ENST00000442659	STOM	stomatin	2040
16849238	0.0652321	0.949771	-0.198102	0.802271	0.456938	0.0680399	0.193605	0.624293	-1.77486	2.10387e-08	-0.476925	0.134567	-1.25682	7.83248e-06	0.0411156	0.895792	1.42904	1.47482e-06	-0.284714	0.588346		6.3043	6.18629	6.28077	5.96104	6.27147	6.00281	6.55218	6.4648	6.48216	6.58744	6.44543	6.62134	9.36119	9.09431	9.00852	9.15372	8.90709	9.14605	8.41189	8.33591	8.16297	8.43497	8.58787	8.58473
16653501	-0.197057	0.962693	0.715169	0.829827	-0.542467	0.663257	0.369759	0.861252	-1.75766	0.0444895	-0.151558	0.970214	0.450303	0.815537	2.05641	0.0194635	-0.305929	0.899216	0.686841	0.831768		10.9744	10.8846	10.8581	10.9546	10.9077	10.9498	10.1008	10.1516	10.1335	9.7087	9.59887	9.77363	10.8717	10.7201	10.788	10.8777	10.7702	10.8182	10.9685	10.9784	11.0246	11.2266	11.1907	11.2289	NM_001155 // NM_001193544 // ENST00000354546 // BC017046 // ENST00000356496 // ENST00000517677 // ENST00000520378 // ENST00000519644 // ENST00000523164 // ENST00000517707	ANXA6	annexin A6	309
17122532	-0.0813648	0.94058	-0.0414727	0.975135	0.729306	0.00726386	0.769198	0.00557471	-1.74957	9.47378e-08	-1.28851	5.36119e-05	0.451977	0.141437	0.913038	0.000315206	0.798562	0.00341726	0.521233	0.178682		8.27553	8.13151	7.88067	8.51642	8.5553	8.3373	7.72939	7.73215	7.74662	9.84456	9.64591	9.57948	7.99676	7.8474	7.79152	7.57507	7.82552	7.43576	5.83717	6.37399	5.95179	5.15645	5.74771	5.74653
16701110	0.313628	0.642754	-0.0950806	0.899653	-0.388847	0.0699508	-0.797556	0.000342585	-1.73964	3.08419e-09	1.71624	3.49263e-08	-0.0108843	0.985016	3.44499	1.23337e-13	-0.969539	2.90231e-05	-0.591576	0.0179726		7.90313	7.61767	7.59696	7.87614	7.69442	7.82554	9.87407	9.74223	9.86192	10.4051	10.461	10.4265	9.22848	9.38085	9.39508	9.34069	9.31841	9.29725	9.62774	9.7044	9.6382	9.84422	9.93532	9.84989	NM_005653 // NM_001173452 // NM_001173453 // ENST00000257915 // ENST00000307660 // U03494	TFCP2	transcription factor CP2	7024
16875530	0.186574	0.799847	-0.0522788	0.959377	1.46696	5.25116e-07	1.22811	5.7688e-06	-1.72441	1.28608e-08	-0.964288	0.000246981	0.438179	0.0808394	1.1983	1.99677e-06	1.80603	2.40202e-08	0.777249	0.00354217		8.44996	8.33246	8.51378	8.55238	8.6442	8.64684	8.25666	8.3996	8.35144	10.0034	9.9477	9.90271	8.80996	8.79525	8.74149	8.73888	8.64675	8.77146	8.90402	8.82372	8.83937	9.92405	9.96801	9.95194	NM_021818 // ENST00000324679 // BC006385	SAV1	salvador homolog 1 (Drosophila)	60485
17088929	0.0200391	0.967216	0.00286382	0.996092	0.0523819	0.709637	0.0352066	0.88479	-1.72366	3.62915e-13	-0.629073	5.11113e-06	-0.290121	0.00929026	0.804465	1.79604e-08	0.33261	0.00281139	-0.00989239	0.989778		10.3367	10.1546	10.1365	10.3849	10.1174	10.3372	10.2574	10.3876	10.316	8.33015	8.30127	8.39478	10.0602	9.96715	9.99443	10.041	9.86749	9.99319	9.89579	9.95887	9.91086	9.22577	9.18487	9.26374	NM_003121 // ENST00000270632 // AK225225 // ENST00000417618 // ENST00000439922	SPIB	Spi-B transcription factor (Spi-1/PU.1 related)	6689
16865789	0.173553	0.792106	0.040998	0.964652	-0.925558	4.51777e-05	-1.05811	8.95042e-06	-1.72281	2.67406e-09	-0.097316	0.880044	-2.37862	6.0051e-11	-0.753128	0.00013562	0.662158	0.00155565	-0.790906	0.000897257		9.49541	9.34417	9.38281	9.6476	9.21996	9.48642	6.86852	6.99733	6.95249	9.26633	9.52479	9.45164	8.16901	8.10115	8.17154	8.1124	8.02644	8.25207	8.74894	8.68824	8.7001	9.64228	9.74512	9.6122	NM_003657 // ENST00000395961 // BC126346 // ENST00000371440 // ENST00000434986 // ENST00000448710 // ENST00000411563	BCAS1	breast carcinoma amplified sequence 1	8537
16654589	-0.201997	0.915025	-0.268006	0.874179	-0.138847	0.840994	-0.204856	0.837976	-1.70857	0.000224739	-0.0668291	0.974293	-0.186674	0.852308	1.45506	0.00123629	-0.461426	0.551028	-0.509254	0.664425		7.44515	7.37927	7.62726	7.50117	7.43124	7.77028	10.3469	10.6105	10.4073	10.3643	10.2007	10.1737	8.56537	8.26802	8.39454	8.51519	8.26094	8.31034	8.17419	8.21117	8.04831	8.20904	8.10729	7.96	NM_206967 // ENST00000284245	C16orf74	chromosome 16 open reading frame 74	404550
16797353	0.0652663	0.925722	-0.0268561	0.975885	0.238585	0.210344	0.146463	0.608657	-1.7077	4.4879e-10	-0.461085	0.0252068	0.176706	0.494511	1.42332	5.83837e-09	0.573408	0.0016876	0.511529	0.0164828		7.84051	7.97249	7.92268	7.99635	8.03445	7.96787	9.68803	9.70118	9.70025	9.43324	9.41188	9.37844	9.3712	9.41497	9.3534	9.4674	9.2371	9.30295	9.31613	9.43861	9.35953	9.66048	9.46681	9.4881	NM_001134398 // NM_003371 // ENST00000371850 // ENST00000406606 // BC132965 // BC132967 // ENST00000371851 // ENST00000343203 // ENST00000325440 // ENST00000486113 // ENST00000472905	VAV2	vav 2 guanine nucleotide exchange factor	7410
16670188	0.448916	0.745571	0.16162	0.928369	1.16718	0.0104208	0.879889	0.0744637	-1.70557	8.86238e-05	0.171628	0.910605	0.95395	0.0459998	2.83114	1.6082e-07	1.2683	0.00560336	1.05507	0.0709141		10.5727	10.4435	10.3469	10.5498	10.4743	10.5003	10.731	10.7991	10.7167	8.90074	8.83078	8.97335	10.4941	10.6301	10.5231	10.268	10.4173	10.5111	10.4046	10.4845	10.4416	10.0591	10.0055	10.0173	NM_001126121 // NM_021734 // NM_001126122 // ENST00000416858 // ENST00000320362 // ENST00000442286 // ENST00000402418 // ENST00000375261 // AK097882	SLC25A19	solute carrier family 25 (mitochondrial thiamine pyrophosphate carrier), member 19	60386
16975007	0.165796	0.779815	-0.0814599	0.905352	-0.327725	0.0886327	-0.57498	0.00291063	-1.70453	8.25932e-10	-1.17114	1.4981e-06	-0.873115	2.44149e-05	-0.339724	0.0411904	0.486419	0.0105054	-0.058971	0.941915		5.23579	5.01773	4.80086	5.00251	4.86428	5.07671	4.98993	5.15038	5.15525	8.45614	8.82327	8.8967	5.11324	5.03349	5.2697	5.20031	4.94459	4.89965	5.17878	5.2316	5.14784	5.30017	4.75459	5.20718	NM_181780 // NM_001085357 // ENST00000334529 // ENST00000383680 // AK292692 // ENST00000496584	BTLA	B and T lymphocyte associated	151888
16900441	0.0316494	0.975108	-0.0987837	0.899301	0.228506	0.335049	0.098073	0.819477	-1.69556	6.37507e-09	-0.499445	0.0515596	0.316171	0.225957	1.51228	3.38273e-08	-0.332299	0.193962	-0.244633	0.600504		6.18704	5.97405	6.15466	6.05032	6.07099	6.17652	5.96992	6.18318	5.95238	5.86965	5.95509	5.76911	8.27565	8.25259	8.15959	7.82947	8.26651	8.39929	8.55128	8.78016	8.70177	8.73782	8.71594	8.7037	NM_018593 // ENST00000368851 // AB057445 // BC066985 // BC017968 // BC034031 // AK126183 // ENST00000368850 // AK172789 // ENST00000419619 // ENST00000368853 // ENST00000458513 // ENST00000439288 // ENST00000465319	SLC16A10	solute carrier family 16, member 10 (aromatic amino acid transporter)	117247
16797378	0.23497	0.856312	-0.0646908	0.969745	0.623524	0.0969014	0.323863	0.560819	-1.69207	7.69398e-06	-0.632734	0.214941	0.910827	0.0143053	1.97017	1.20772e-06	0.611126	0.141051	0.898429	0.0490916		9.531	9.17675	9.43821	9.63868	9.3413	9.38513	8.42299	8.58171	8.29979	10.2755	10.1206	10.2915	8.41261	8.37886	8.48034	8.34643	8.23994	8.44557	7.71543	7.98085	7.5073	7.03456	7.18019	7.30431	NM_001114735 // NM_004049 // ENST00000267953 // U29680	BCL2A1	BCL2-related protein A1	597
16863593	0.0975754	0.938505	0.0167773	0.992964	1.20429	0.000286567	1.12349	0.00071236	-1.68684	1.27893e-06	0.0158387	0.993356	0.134685	0.828666	1.83737	4.41866e-07	1.68326	4.90789e-06	0.613651	0.175645		8.06454	7.81379	8.1138	8.35795	8.16761	8.26001	10.3799	10.1642	10.2028	10.8136	10.5593	10.5595	9.34191	9.33671	9.36576	9.35155	9.33345	9.27454	9.23742	9.28874	9.14538	9.57896	9.54536	9.50436	NM_181671 // NM_012417 // ENST00000299954 // ENST00000335257 // BC007905 // ENST00000423236	PITPNC1	phosphatidylinositol transfer protein, cytoplasmic 1	26207
17114174	0.0552638	0.95941	-0.133973	0.878643	0.109632	0.738365	-0.0796044	0.88728	-1.68103	6.66497e-08	-0.414728	0.260702	0.196942	0.62248	1.46324	4.62466e-07	0.173424	0.707807	0.260735	0.663187		10.5061	10.4826	10.6309	10.5454	10.4808	10.5803	9.05256	9.13395	9.16823	10.8757	11.0572	11.0844	10.6436	10.8062	10.7742	10.6331	10.7028	10.8393	10.5367	10.5754	10.6921	10.2394	10.2684	10.2129	NM_030797 // ENST00000355549 // ENST00000381323 // ENST00000406434 // AL136704 // BC038971 // ENST00000445605 // ENST00000451689 // ENST00000469507 // AK315065	FAM49A	family with sequence similarity 49, member A	81553
17075478	0.102632	0.844088	0.0462797	0.940658	0.0732419	0.704503	0.0168892	0.963785	-1.67899	5.00302e-11	-1.35028	1.29781e-08	-0.0209857	0.954837	0.307728	0.0212622	0.352484	0.0233511	0.258257	0.278281		8.27664	7.75188	7.97977	8.24357	7.90533	7.97028	8.24564	8.26639	8.39916	11.2598	11.3827	11.3745	8.14442	7.83556	7.79928	7.76884	7.72674	7.9326	8.40765	8.59372	8.56892	10.5574	10.5704	10.5854
16870394	0.104414	0.854729	-0.0199837	0.980526	0.0994906	0.612589	-0.0249069	0.947536	-1.66997	1.31338e-10	-0.555455	0.00202267	0.205768	0.321377	1.32028	3.57363e-09	0.0365019	0.931487	0.14278	0.738139		9.07358	9.17938	9.16193	9.11701	9.19461	9.16338	9.36545	9.55896	9.4883	7.6934	7.74382	7.80453	9.18582	9.18774	9.19847	9.28533	9.14355	9.15173	9.17962	9.16475	9.19798	8.69626	8.47206	8.48681	NM_001145001 // NM_001166169 // NM_001166171 // NM_014397 // NM_001166167 // NM_001166170 // NM_001166168 // ENST00000373600 // ENST00000373603 // ENST00000320246 // AK294614 // BC000101 // BC004174 // BC004209 // AB026289 // BC012761 // AF087909 // CR542222 // CR457091 // ENST00000394199 // ENST00000373601 // ENST00000425237 // ENST00000422297 // ENST00000373596 // ENST00000444973 // ENST0000042…	NEK6	NIMA (never in mitosis gene a)-related kinase 6	10783
16787994	0.136087	0.9064	0.0105306	0.994772	2.26743	6.31285e-08	2.14187	1.45358e-07	-1.66019	1.06218e-06	-0.719218	0.0470169	-0.198434	0.702574	0.742534	0.00644022	2.39045	2.51838e-08	-0.075413	0.956225		6.56669	6.43558	6.62448	6.44178	6.36772	6.53341	8.48723	8.69471	8.72773	7.51361	7.56217	7.54646	6.68745	6.51056	6.5722	6.80999	6.61175	6.65348	6.75905	6.91357	6.85464	6.64179	6.47564	6.61331	NM_006291 // ENST00000333007 // M92357 // ENST00000451723	TNFAIP2	tumor necrosis factor, alpha-induced protein 2	7127
16728389	0.21273	0.726034	0.0598575	0.942332	0.632086	0.0019729	0.479213	0.0218083	-1.65853	3.16793e-09	-0.475002	0.0439096	-0.299744	0.212838	0.883786	1.62322e-05	1.04699	6.55487e-06	0.115164	0.874605		10.3384	10.3469	10.2983	10.3976	10.2956	10.3327	7.97569	7.66668	7.90712	8.27105	7.94311	7.8595	10.663	10.6803	10.5958	10.5642	10.5939	10.5724	10.0141	9.98463	9.84027	10.0722	10.2441	10.0119	NM_014729 // ENST00000361421 // AB018351 // ENST00000456290	TOX	thymocyte selection-associated high mobility group box	9760
16829690	0.0320869	0.976604	-0.0813751	0.933296	0.594771	0.0135016	0.481309	0.0616892	-1.65482	3.8977e-08	-1.19695	2.91453e-05	-0.00809811	0.991468	0.449774	0.0336278	0.616853	0.0110235	0.0139845	0.993333		7.72409	7.27862	7.80577	7.84739	7.81857	7.80645	8.53424	8.40483	8.59813	11.7607	12.0848	12.0736	9.62746	9.47991	9.62963	9.27898	9.60271	9.66185	8.13658	8.20611	8.2204	8.03452	8.50415	8.58084
16741130	0.0586538	0.96085	-0.127754	0.899653	0.233346	0.471578	0.046938	0.94376	-1.64326	4.07062e-07	1.23731	0.000137356	-1.1415	0.000134867	1.73907	1.94688e-07	1.14592	0.000133109	-0.228926	0.775949		5.78025	5.89387	5.95327	6.10461	6.06407	6.39444	6.16497	6.52318	6.72348	6.95963	7.32234	7.18472	9.4455	9.44007	9.51562	9.00618	9.36136	9.31288	6.75153	6.79541	6.81774	6.87444	6.59905	6.6878	NM_152280 // ENST00000368324 // BC039205	SYT11	synaptotagmin XI	23208
16745343	-0.042337	0.927223	0.0500617	0.911103	0.0666551	0.656356	0.159054	0.299034	-1.64268	2.40518e-12	-0.416985	0.00186531	-0.0503072	0.832124	1.17538	2.56734e-10	-0.174315	0.231591	-0.291277	0.0527177		8.52699	8.22496	8.35883	8.62037	8.45252	8.20645	7.31305	7.32874	7.51148	10.3047	10.0219	9.84587	7.50096	7.39213	7.67517	7.27984	7.37171	7.08561	6.33247	6.36355	6.29336	5.63674	6.44911	6.02448
17075460	-0.00751884	0.992239	-0.0352627	0.961695	0.0895232	0.665496	0.0617794	0.859908	-1.63308	2.59398e-10	-0.354932	0.0818252	0.035111	0.928135	1.31326	5.65408e-09	0.0808928	0.819265	0.0264806	0.976618		5.77587	5.24931	5.89917	5.87661	5.4234	6.05589	5.36942	5.48702	5.58868	5.28088	5.12159	5.39773	9.02006	8.66768	8.50929	8.69996	8.564	8.52334	9.27673	9.2086	9.17894	9.44367	9.22824	9.30984	NM_005213 // ENST00000264474 // BC010379	CSTA	cystatin A (stefin A)	1475
16661149	0.028834	0.970214	0.0100393	0.99197	0.0992945	0.639114	0.0804998	0.810023	-1.62012	4.60528e-10	-0.495342	0.00979611	-0.559855	0.00127581	0.564925	0.000396249	0.773536	3.67129e-05	0.114387	0.837587		9.42294	9.29346	9.25843	9.41983	9.45419	9.38664	10.2194	10.328	10.1619	7.8083	8.11492	7.86891	9.54409	9.52207	9.65397	9.36843	9.50528	9.63548	9.96184	9.71778	9.74657	8.80136	8.87703	8.98778	NM_014033 // ENST00000332160 // AY358797 // ENST00000433599	METTL7A	methyltransferase like 7A	25840
17123592	0.0118177	0.991728	-0.337597	0.668867	-0.0591493	0.864177	-0.408564	0.136256	-1.61572	5.74932e-08	-0.0997206	0.898189	0.320732	0.290357	1.83673	9.51524e-09	-0.252169	0.472517	0.127712	0.885595		9.86375	10.0173	9.89442	9.92944	10.0579	10.059	9.79092	9.93056	9.87906	9.1398	9.16094	9.23265	10.3782	10.6344	10.5447	10.28	10.5608	10.553	10.8822	10.6645	10.7094	11.4799	11.3627	11.2654	NM_001503 // NM_177483 // ENST00000230036 // ENST00000378243 // L11702 // ENST00000474784 // ENST00000492917 // ENST00000486892 // ENST00000475417	GPLD1	glycosylphosphatidylinositol specific phospholipase D1	2822
17066894	0.109119	0.784657	0.0954663	0.815995	0.12746	0.362105	0.113807	0.550833	-1.61456	6.53785e-12	-0.587399	7.0888e-05	-0.389847	0.00227406	0.63731	2.87668e-06	0.382192	0.00276574	-0.135115	0.637711		8.76266	8.76288	8.79804	8.79899	8.77662	8.73975	8.73241	8.69406	8.76961	7.36152	7.29318	7.4141	8.73224	8.69725	8.72354	8.58146	8.74369	8.74524	8.73276	8.78403	8.70737	8.60379	8.53561	8.5412	NM_145792 // NM_145791 // NM_145764 // NM_020300 // ENST00000010404 // ENST00000396209 // ENST00000396207 // ENST00000396210 // J03746	MGST1	microsomal glutathione S-transferase 1	4257
16769868	0.155302	0.721552	0.0256711	0.968466	0.574499	0.000137065	0.444868	0.00226028	-1.61275	3.54619e-11	-0.531271	0.000834527	-0.101467	0.659889	0.980008	3.89572e-08	0.650498	2.99724e-05	-0.0254671	0.972437		10.2424	10.3424	10.2088	10.2554	10.385	10.3445	10.1343	10.1584	10.1798	10.3914	10.2782	10.345	9.05041	9.1121	9.22517	9.057	9.16952	9.26235	8.3243	8.52351	8.60224	8.4185	8.45383	8.56001	NM_014325 // ENST00000261401 // ENST00000420959 // AM849478	CORO1C	coronin, actin binding protein, 1C	23603
17068369	-0.686858	0.665075	0.221563	0.90583	-0.221139	0.7389	0.687283	0.289113	-1.61219	0.000561341	-0.588208	0.539527	-0.0759168	0.95098	0.94807	0.0363016	0.114417	0.931942	0.259639	0.891133		6.12672	6.18214	6.09119	5.94954	6.03508	5.87024	6.71582	6.84722	6.97111	6.54279	6.74552	6.77469	7.92697	8.07825	8.04608	8.07328	8.13729	8.16261	6.92794	7.02229	7.00825	6.96345	7.03421	7.1923	NM_025081 // ENST00000382554 // BC065283	NYNRIN	NYN domain and retroviral integrase containing	57523
17088957	0.059494	0.892815	-0.0250309	0.963043	0.183905	0.138415	0.0993797	0.597587	-1.60328	3.21968e-12	-0.643051	1.14136e-05	-0.28215	0.0218475	0.678083	6.12683e-07	0.571073	1.91559e-05	0.105018	0.741027		10.7583	10.8634	10.787	10.7696	10.753	10.7665	10.5996	10.6368	10.5424	8.82489	9.09597	9.24657	10.7365	10.6605	10.9012	10.6098	10.6547	10.7604	10.8907	10.9722	10.9856	11.0714	11.1544	11.171	NM_015967 // NM_001193431 // NM_012411 // ENST00000359785 // ENST00000420377 // AF001846 // ENST00000484147 // ENST00000354605 // ENST00000460620 // ENST00000469077	PTPN22	protein tyrosine phosphatase, non-receptor type 22 (lymphoid)	26191
16993919	0.0961443	0.865547	0.0369347	0.957838	-0.308887	0.0504422	-0.368097	0.0227864	-1.60114	1.38879e-10	-0.61586	0.000462479	-0.86325	2.59203e-06	0.122028	0.440188	0.535659	0.000786321	-0.0187041	0.984465		3.54117	3.31018	3.51738	3.60896	3.42488	3.27769	3.23636	3.51848	3.28265	7.03757	7.54637	7.33902	3.43734	3.40871	3.51856	3.72411	3.59085	3.44785	3.68251	3.68898	3.66737	4.13583	4.947	4.71555	NM_213658 // NM_213657 // NM_002259 // NM_007328 // ENST00000359151 // ENST00000347831 // BC012550	KLRC1	killer cell lectin-like receptor subfamily C, member 1	3821
16696478	0.0820621	0.925372	0.00142965	0.998961	-0.712246	0.00189875	-0.792878	0.00078012	-1.59883	2.80982e-08	-0.016894	0.988546	-1.71625	2.91374e-08	-0.134314	0.577987	0.708425	0.0019304	-0.295578	0.505132		4.77572	4.81678	5.168	5.00808	5.05549	4.86233	4.6948	4.89813	4.46736	8.72942	9.17428	8.9396	6.25428	5.81549	5.7441	6.07193	5.59405	5.6656	5.31547	5.4634	5.17347	8.15362	8.63056	8.59088	NM_002922 // ENST00000367459 // AK093544 // ENST00000498352 // ENST00000469578 // ENST00000462589 // ENST00000474373	RGS1	regulator of G-protein signaling 1	5996
16730522	-0.02118	0.963801	0.0581127	0.879703	-0.0644859	0.637058	0.0148067	0.95539	-1.59511	1.0381e-12	0.100254	0.676783	0.353072	0.00163517	2.04843	2.06197e-14	-0.0840035	0.659516	0.333554	0.00971728		9.78175	9.82987	9.7582	9.65504	9.7506	9.83282	9.30136	9.23254	9.41839	10.9307	10.9405	10.9804	10.1033	10.1308	10.1838	10.1409	10.073	10.0816	10.2812	10.0682	10.0985	10.6132	10.5468	10.5101	NM_021213 // NM_001102402 // ENST00000417982 // ENST00000268896 // AF151638 // ENST00000325214	PCTP	phosphatidylcholine transfer protein	58488
17117622	0.366806	0.687399	-0.183001	0.862689	1.03716	0.000915432	0.487357	0.170049	-1.59138	1.60216e-06	-0.177091	0.83783	0.154391	0.783049	1.56868	2.13985e-06	0.396021	0.309151	-0.486752	0.327285		8.22065	7.99549	8.14115	8.46159	8.19106	8.16888	9.00543	8.85908	9.0356	10.5959	10.716	10.8763	8.57949	8.46805	8.47943	8.43299	8.43052	8.48187	8.65011	8.5766	8.47385	8.64451	8.67079	8.57481	NM_024901 // ENST00000357640 // BC004557 // ENST00000369752 // ENST00000473682 // ENST00000477586 // ENST00000468692 // ENST00000473822 // ENST00000463713 // ENST00000488786	DENND2D	DENN/MADD domain containing 2D	79961
17050154	-0.0850649	0.82895	-0.0649492	0.872313	-0.233275	0.0494612	-0.213159	0.100444	-1.58131	2.81618e-12	-0.227941	0.131407	-0.143841	0.345619	1.20953	1.18039e-10	-0.256835	0.0341923	-0.167402	0.420941		11.4374	11.3841	11.3985	11.41	11.38	11.3203	10.2052	10.2986	10.4429	6.33622	6.85495	6.58897	11.6866	12.0685	11.9891	11.6443	11.9615	11.9383	11.1533	11.5437	11.4411	8.76621	9.35754	9.25261	NM_005582 // ENST00000256447 // BC109069 // ENST00000515027	CD180	CD180 molecule	4064
16652419	-0.927541	0.676416	0.234277	0.935666	-0.264074	0.78184	0.897743	0.340378	-1.57755	0.011921	0.619269	0.703304	-0.498487	0.674446	1.69833	0.00764099	0.0599355	0.977158	-0.174477	0.956795		5.93803	5.71438	5.86595	5.93408	5.99811	5.98865	7.69472	7.88182	7.92653	8.48339	8.5424	8.43465	6.62282	6.6173	6.43838	6.56682	6.51512	6.41993	7.18713	7.11249	7.03911	7.26442	7.14836	7.05579	NM_005739 // NM_001128602 // ENST00000310803 // ENST00000450598 // AF081195 // ENST00000415523 // ENST00000414708 // ENST00000431814	RASGRP1	RAS guanyl releasing protein 1 (calcium and DAG-regulated)	10125
17045182	0.0486887	0.926435	0.00963059	0.98902	0.213107	0.131649	0.174049	0.326705	-1.57617	2.99011e-11	-0.637139	6.89058e-05	0.0531652	0.845929	0.992197	1.95953e-08	-0.010938	0.977979	-0.170879	0.538211		8.52338	8.14914	8.28927	8.52195	8.4457	8.39824	7.20996	7.28635	6.97541	10.3784	10.6712	10.6152	8.85659	8.93406	8.69644	8.57949	8.93227	8.6991	8.26507	8.40678	8.5325	9.56082	10.0456	10.1099	NM_032553 // ENST00000276077 // BC104922	GPR174	G protein-coupled receptor 174	84636
16815918	-0.110053	0.93538	-0.137338	0.914108	-0.481641	0.169517	-0.508926	0.204706	-1.57566	6.46335e-06	-0.560236	0.245455	-3.84666	6.71616e-11	-2.83123	2.24242e-09	3.64759	1.82557e-10	0.282568	0.758789		6.8627	6.70664	6.78841	6.89422	6.71657	6.7359	7.13085	7.45788	7.3315	9.8674	9.81864	9.74436	7.22936	6.96532	7.01453	6.59114	7.01338	6.89357	7.03123	7.01624	6.99458	7.70853	7.62481	7.51741
16950912	0.101698	0.85082	-0.0424155	0.947515	-0.846433	3.33374e-06	-0.990546	4.57787e-07	-1.56827	1.63865e-10	-0.93477	2.10266e-06	-0.943182	6.62839e-07	-0.309678	0.0224894	0.149284	0.525524	0.0525351	0.936055		10.7867	10.7388	10.7262	10.8599	10.8905	10.8624	10.9739	10.9858	11.0775	9.60201	9.72509	9.76219	10.8122	10.8444	10.9177	10.9073	10.9144	10.9965	11.0546	11.0516	11.0478	10.6768	10.6147	10.6436	NM_000698 // ENST00000374391 // AB208946 // ENST00000481117 // ENST00000475300 // ENST00000498461 // ENST00000483623 // ENST00000493336	ALOX5	arachidonate 5-lipoxygenase	240
16797224	0.105424	0.895907	-0.0210165	0.985292	-0.0483492	0.87856	-0.17479	0.614041	-1.55991	2.31344e-08	-0.573649	0.0198935	-0.258421	0.369182	0.727838	0.000343638	0.086417	0.860791	-0.123654	0.875078		8.43044	8.33487	8.35262	8.37992	8.27392	8.37642	8.88993	8.67548	8.77271	6.97208	6.86006	6.99111	8.70818	8.5345	8.52207	8.50292	8.34379	8.5676	8.34485	8.48631	8.40037	7.43176	7.32134	7.30925	NM_001003940 // NM_033503 // NM_001003942 // NM_001003943 // ENST00000354670 // ENST00000397573 // ENST00000431415 // ENST00000220446 // ENST00000397567 // BC070043	BMF	Bcl2 modifying factor	90427
17044199	0.217853	0.877636	0.0121381	0.995599	-0.0417137	0.948298	-0.247428	0.726653	-1.55926	5.7141e-05	-0.354911	0.685154	-0.0209545	0.984775	1.18339	0.00112005	0.030143	0.979505	0.0509021	0.982441		11.555	11.6232	11.4969	11.3602	11.5132	11.2895	11.4835	11.5099	11.4244	12.1294	12.0796	11.9615	11.3694	11.3333	11.3247	11.2668	11.4186	11.2581	10.6864	10.9633	10.9024	9.80214	9.94756	10.1338
16657217	0.0647528	0.943588	-0.194724	0.789825	0.347154	0.135603	0.0876777	0.85055	-1.55563	3.83765e-08	-0.209353	0.66259	-0.215159	0.509699	1.13112	2.93262e-06	0.260436	0.399829	-0.301877	0.481236		10.1544	10.1776	10.1141	10.2666	10.2061	10.2048	10.4851	10.4938	10.5	9.49538	9.27998	9.51396	10.4681	10.5168	10.4548	10.4141	10.443	10.6437	10.5545	10.6055	10.6322	11.2031	11.018	11.1078	NM_000405 // NM_001167607 // ENST00000357164 // BC009273	GM2A	GM2 ganglioside activator	2760
16691090	-0.039908	0.944277	-0.0910982	0.851078	-0.0368736	0.852391	-0.0880638	0.721299	-1.53715	5.46629e-11	0.182802	0.441993	0.35653	0.0118796	2.07648	5.27586e-13	-0.20997	0.207353	0.183433	0.503175		9.31028	9.25728	9.17689	9.33062	9.24994	9.30664	9.16708	9.13343	9.10719	7.35993	7.16414	7.28507	9.08839	9.37332	9.27359	9.11531	9.29378	9.32646	9.00613	9.1635	9.15184	8.80706	8.87366	8.83394	NM_033518 // ENST00000376876 // ENST00000317669 // AF276889 // BC019246 // ENST00000453124 // ENST00000376875 // ENST00000440085 // ENST00000413668 // ENST00000441948 // ENST00000429543 // ENST00000416711 // ENST00000494034 // ENST00000488083 // ENST00000462359 // ENST00000480105 // ENST00000497336 // AF318358	SLC38A5	solute carrier family 38, member 5	92745
17082752	0.0147207	0.984041	0.0121385	0.987375	-0.656813	6.24822e-05	-0.659396	6.566e-05	-1.52989	1.72046e-10	-0.313991	0.0944051	-0.714065	1.94137e-05	0.501837	0.00036066	0.0247857	0.952293	-0.0324659	0.965337		7.98503	7.77529	7.67205	7.99446	7.84109	7.76866	7.52538	7.74917	7.4082	10.8416	10.9319	10.7279	7.68462	7.59747	7.47218	7.48249	7.53773	7.4079	6.26551	6.66336	6.62389	7.65176	8.20806	8.10783	NM_020747 // ENST00000306315 // ENST00000395401 // BC151226 // ENST00000395398 // ENST00000505686 // ENST00000504926 // ENST00000513985 // ENST00000503896	ZNF608	zinc finger protein 608	57507
16847207	-0.048016	0.976604	-0.108145	0.939335	-1.12959	0.00147508	-1.18972	0.00102084	-1.52825	1.47181e-05	-0.521083	0.333803	-0.157382	0.814619	0.849784	0.00594013	-0.230357	0.721135	0.741855	0.114081		9.66692	9.63097	9.62225	9.6728	9.72879	9.71223	9.90989	9.96369	9.9994	6.89595	6.2429	6.87871	9.49999	9.89967	9.81895	9.70045	9.78677	9.73358	9.63766	10.045	9.88932	7.59636	7.47358	7.59379	NR_002798 // AK300884 // ENST00000253720	NAPSB	napsin B aspartic peptidase pseudogene	256236
16940260	0.0882814	0.901317	0.133181	0.836366	-0.0382671	0.892966	0.00663296	0.990173	-1.52319	4.94668e-09	-1.13462	2.84525e-06	0.331733	0.121057	0.720308	9.38957e-05	-0.135507	0.691404	0.234493	0.549221		9.34858	9.40951	9.3232	9.53806	9.63909	9.28119	9.48562	9.51797	9.39722	6.60693	6.35603	6.21784	9.25594	8.91417	9.05394	8.86298	8.95108	8.9419	9.39884	9.20846	8.8621	9.42581	9.17707	9.18794
16757059	0.128622	0.873896	-0.160613	0.824575	0.110774	0.688834	-0.178461	0.607821	-1.51709	3.81718e-08	-0.26079	0.513944	-0.20844	0.512725	1.04786	5.66224e-06	0.549848	0.0134001	0.230634	0.648721		11.6185	11.6193	11.6053	11.629	11.6817	11.65	11.0526	11.4292	11.2655	11.2145	11.3037	11.4429	11.5689	11.355	11.5459	11.4422	11.4803	11.6052	11.037	11.2542	11.071	8.94924	9.21791	9.01511	NM_207103 // ENST00000399600 // AY358809 // BC130554 // AK297035 // BC127925 // BC130556 // BC144395 // ENST00000315768 // ENST00000399594 // ENST00000399592 // AK057142	C17orf87	chromosome 17 open reading frame 87	388325
16836489	0.103774	0.904521	-0.142828	0.857363	-0.183803	0.488408	-0.430405	0.0891763	-1.50926	7.97053e-08	-0.375453	0.264004	-0.17613	0.629799	0.957681	3.12148e-05	0.224061	0.523709	0.231735	0.676018		7.62457	7.61606	7.58019	7.68408	7.70843	7.61026	7.23089	7.40166	7.02507	10.222	10.229	10.1217	7.92346	8.27329	8.29066	7.7967	8.27342	8.3181	8.46144	8.40626	8.25471	10.51	10.6994	10.6896	NM_001079526 // NM_016260 // ENST00000434687 // ENST00000457361 // ENST00000374319 // BC028936 // AK301503 // AY587062 // AY587064 // AF130863 // AY587063 // AY587073 // AY587068 // AY587065 // AY587069 // AY587067 // AY587071 // AY587066 // AY587070 // AY587072 // AY008294 // ENST00000412444 // ENST00000431520 // ENST00000413091 // ENST00000439848 // ENST00000453575 // ENST00000451136 // ENST000…	IKZF2	IKAROS family zinc finger 2 (Helios)	22807
16848070	-0.0778338	0.889552	-0.0800573	0.879703	-0.118495	0.500976	-0.120718	0.62139	-1.50905	2.42076e-10	-0.257761	0.233505	-0.297289	0.0698451	0.954002	1.55113e-07	0.221976	0.229158	0.0431815	0.94851		6.75286	6.69213	6.63025	6.69703	6.46688	6.56655	6.89545	6.56736	6.59135	6.82602	6.51152	6.81961	9.42224	9.7367	9.44874	9.17691	9.29524	9.39888	8.91981	8.85128	8.92202	8.79487	8.99275	9.04251
16879916	0.165954	0.792565	0.0496017	0.953821	0.320276	0.114954	0.203924	0.466472	-1.5036	9.73945e-09	-0.224653	0.545244	0.0779857	0.844026	1.35693	4.26961e-08	0.2561	0.311613	0.0138092	0.992491		10.7824	10.5863	10.6273	10.9606	10.6554	10.8166	10.2718	10.3889	10.4033	8.07455	8.0416	8.01374	10.3632	10.1939	10.3129	10.463	10.0744	10.3309	10.3197	10.2679	10.2536	9.35428	9.14237	9.40809	NM_001425 // ENST00000270221 // U87947	EMP3	epithelial membrane protein 3	2014
17099703	-0.152759	0.930569	-0.163677	0.925115	-0.299968	0.573284	-0.310886	0.681049	-1.50249	0.00029242	0.15564	0.920068	-0.136356	0.887112	1.52177	0.000290447	-0.174012	0.864012	-0.0104	0.99707		9.10639	9.14874	9.21423	9.25258	9.3886	9.2619	9.08005	9.15832	9.22171	10.3974	10.4338	10.6109	8.56919	8.38273	8.43739	8.45238	8.48315	8.24773	6.89646	7.52403	7.29445	6.75137	7.37582	7.22715
16842812	0.223207	0.704002	0.11864	0.860658	-0.140875	0.540089	-0.245442	0.33746	-1.48533	1.03304e-08	-0.139775	0.774405	0.23214	0.371434	1.57769	4.41585e-09	-0.107612	0.78592	0.265403	0.474648		7.14513	7.19827	7.12482	7.3957	7.13716	7.20113	6.35754	6.09648	6.29864	7.13105	6.97448	6.81082	7.56654	7.72062	7.75756	7.5763	7.5683	7.55105	8.62938	8.73051	8.45616	8.94239	8.83052	8.78989	NM_006257 // ENST00000263125 // BC101465 // ENST00000397176 // ENST00000397178	PRKCQ	protein kinase C, theta	5588
17044414	0.219391	0.658237	-0.0471247	0.940658	0.337378	0.0299718	0.0708623	0.815272	-1.48265	3.59337e-10	-0.385042	0.0299533	-0.150073	0.498892	0.947532	1.95356e-07	0.592691	0.000245331	0.10524	0.832739		5.2934	4.79304	5.17251	5.80093	4.99206	4.90815	10.0483	9.8613	10.0726	8.78524	8.91378	8.68786	5.05499	4.64333	5.09358	4.80867	4.58795	4.68552	4.89707	5.05247	4.97568	5.11825	5.62592	5.77709
16844294	0.218358	0.640421	-0.00659677	0.993663	0.37537	0.00881157	0.150415	0.45283	-1.48235	1.21587e-10	-0.322105	0.0594726	0.231073	0.159126	1.39132	2.71235e-10	0.0695476	0.819446	-0.0747489	0.887759		4.63407	4.85409	4.60403	4.63094	4.56646	4.56258	4.68939	4.30446	4.38487	8.27994	8.45434	8.13876	5.13775	5.33232	4.94075	4.70879	5.24316	4.80795	4.6428	5.25271	4.70208	6.97855	7.20912	6.9136	NM_001781 // NR_026672 // NR_026671 // ENST00000228434 // Z22576 // ENST00000416624	CD69	CD69 molecule	969
17125782	-0.0284816	0.977153	-0.172933	0.807903	0.358382	0.114384	0.21393	0.506406	-1.47574	6.01073e-08	-1.08553	3.52412e-05	-0.0166789	0.977334	0.373527	0.0576755	0.266956	0.367867	-0.108105	0.899228		9.50423	9.56697	9.47626	9.64818	9.61328	9.77329	9.59869	9.79232	9.67515	10.8731	10.9666	10.9267	9.49814	9.44634	9.47792	9.43558	9.2806	9.36757	9.35051	9.40271	9.40726	9.19156	9.40278	9.38523
17017935	0.217349	0.773268	-0.063737	0.951158	0.282434	0.278893	0.00134764	0.9982	-1.47425	2.13494e-07	-0.809565	0.00254833	0.156807	0.700721	0.821492	0.000293922	-0.780307	0.0014852	-0.905934	0.00116724		6.19354	6.0601	6.17061	6.0449	6.19674	6.15696	5.86654	6.01848	5.9756	8.32573	8.38181	8.29067	7.26888	7.09946	7.02767	7.02478	7.12619	7.14125	6.94711	7.10449	6.94639	8.10823	8.59474	8.55982	NM_013390 // NM_001135820 // ENST00000377066 // ENST00000377044 // ENST00000396272 // AF137030 // BC146780 // BC140773 // AK300405 // AK303765 // ENST00000434022 // ENST00000377057 // ENST00000377055 // ENST00000474495	TMEM2	transmembrane protein 2	23670
16657219	0.0321154	0.960171	-0.0436136	0.945023	0.287449	0.061817	0.21172	0.260531	-1.46765	3.19447e-10	-0.0848037	0.847554	-0.289378	0.0773574	1.09347	2.06881e-08	0.261052	0.122993	-0.315776	0.125564		8.68096	8.53475	8.44936	8.79622	8.6626	8.68987	9.03622	9.01145	8.93334	10.8057	10.7194	10.5593	8.84434	8.8055	8.66982	8.74518	8.70054	8.7618	8.76542	8.8636	8.61317	8.90827	8.83411	8.78388	NM_005923 // ENST00000359015 // BC088829 // ENST00000355845 // ENST00000367768	MAP3K5	mitogen-activated protein kinase kinase kinase 5	4217
16935502	0.00145374	0.99871	-0.104203	0.880685	-0.23822	0.265792	-0.343877	0.127096	-1.46563	1.60496e-08	-1.36125	4.5407e-07	0.444534	0.0313844	0.548907	0.00219046	-0.479372	0.0184721	0.203382	0.668797		9.10088	9.01453	8.93594	9.05737	9.13631	9.14486	6.89742	7.12944	7.11175	7.25	7.1871	6.97253	6.96753	6.95966	6.96829	6.8039	6.9028	6.78205	6.82096	6.97843	6.60854	6.81159	6.87518	6.73312	NM_000251 // ENST00000233146 // AK304496 // BC021566 // U04045 // U03911 // L47581 // L47582 // L47583 // AK297763 // AK296831 // AK299667 // ENST00000448533 // ENST00000453755 // ENST00000394794 // AK222860 // ENST00000419559 // ENST00000394792 // ENST00000432737 // AK223284 // ENST00000413880 // ENST00000422810 // ENST00000406134 // BC012599 // ENST00000454849	MSH2	mutS homolog 2, colon cancer, nonpolyposis type 1 (E. coli)	4436
16822187	0.10711	0.77704	-0.00625242	0.993241	0.335584	0.00552637	0.222221	0.0937776	-1.46443	1.26933e-11	-0.372963	0.00530694	-0.703347	1.27311e-06	0.388117	0.000491219	0.968187	1.53212e-08	-0.0707441	0.870158		8.12683	8.28148	8.38806	8.43335	8.50128	8.43301	7.83366	8.01946	7.99637	8.80846	8.98015	8.85445	9.73669	9.82816	9.94556	9.62633	9.75922	9.8868	10.1365	10.0252	9.96128	10.229	10.0892	10.0526	NM_194318 // ENST00000343307 // BC068595 // ENST00000461652	B3GALTL	beta 1,3-galactosyltransferase-like	145173
16753767	0.0217065	0.988147	-0.133495	0.901185	-0.261426	0.440701	-0.416628	0.263108	-1.46211	3.83987e-06	-0.331394	0.560315	1.4154	1.95735e-05	2.54611	1.92788e-09	-1.06039	0.000576587	0.616427	0.13213		9.52059	9.29519	9.36461	9.67649	9.36216	9.49611	9.08202	9.01212	9.29774	6.44886	6.65042	6.50077	8.60135	8.81717	8.98105	8.48174	8.63757	8.88617	8.62854	8.60544	8.58973	7.80247	7.66716	7.68536	NM_138790 // ENST00000392593 // BC015003 // ENST00000472901 // ENST00000472702	PLD4	phospholipase D family, member 4	122618
16973879	-0.0146353	0.979845	-0.0930019	0.813368	0.0262117	0.883657	-0.0521549	0.831327	-1.45464	1.80761e-11	-0.293376	0.0388447	-0.103466	0.578546	1.0578	1.51063e-09	0.145752	0.377842	0.0160752	0.981777		8.87171	8.68947	9.18892	9.16811	8.76277	9.06818	5.44821	5.90895	5.87253	5.87881	5.6916	5.92577	9.12237	9.03896	9.25036	8.86449	9.05989	9.16624	8.78096	8.89975	8.96102	8.85516	9.07122	9.09722
16850025	0.0813129	0.909811	0.0297474	0.974573	0.0868987	0.72191	0.0353331	0.937185	-1.45379	9.00142e-09	-0.0535714	0.935959	-0.28888	0.198568	1.11134	3.90109e-07	0.394059	0.0484192	0.0182809	0.988589		8.04165	8.08777	7.72064	8.29118	8.03809	7.97705	8.81056	9.1613	8.90713	11.1742	11.3231	11.1738	8.38207	8.13085	8.34545	8.09934	8.02133	8.35598	8.2838	8.0207	7.95849	8.40511	8.15139	8.38288	NM_033285 // NM_001135733 // ENST00000342697 // ENST00000448464 // AF409114 // ENST00000378776	TP53INP1	tumor protein p53 inducible nuclear protein 1	94241
16883498	-0.00187486	0.997888	0.0243854	0.975426	0.0428773	0.849597	0.0691376	0.828769	-1.45004	8.57075e-10	-0.164927	0.606922	-0.353759	0.0336516	0.931354	4.25848e-07	0.543135	0.000923752	0.146499	0.722956		3.1443	2.78907	2.71547	3.05319	3.14847	2.97793	5.66466	5.67194	5.94745	5.99946	5.80791	5.92425	3.21574	3.02723	2.88849	3.17278	2.94573	2.72269	3.27702	3.16764	3.14868	3.40189	3.24786	3.37719
17011255	0.146359	0.772176	-0.104172	0.854071	-0.130937	0.482179	-0.381467	0.0236276	-1.4413	1.10941e-09	-0.254809	0.293761	0.278289	0.126907	1.46478	8.45594e-10	-0.300218	0.0893284	0.109008	0.836607		11.5273	11.5866	11.5565	11.508	11.5914	11.4594	10.9883	10.9379	10.9498	12.4794	12.6355	12.5477	11.4221	11.6387	11.6341	11.4082	11.6146	11.6118	11.497	11.5359	11.5526	12.3479	12.4795	12.4088	NM_002838 // NM_080921 // NM_080923 // ENST00000367376 // ENST00000348564 // ENST00000367364 // ENST00000413409 // ENST00000418674 // ENST00000367379 // AK292131 // AK303539 // BC017863 // BC121086 // BC121087 // BC127656 // BC127657 // BC148257 // ENST00000367366 // ENST00000271610 // ENST00000442510 // ENST00000352140 // ENST00000367372 // ENST00000367367 // ENST00000391970 // ENST00000427110 /…	PTPRC	protein tyrosine phosphatase, receptor type, C	5788
17125650	0.332	0.608457	-0.191432	0.755663	0.396917	0.0426523	-0.126515	0.707531	-1.43817	1.34333e-08	-0.213967	0.560758	0.481706	0.0142327	1.70591	1.17662e-09	0.240835	0.343534	0.325624	0.288698		9.86426	9.94448	10.0557	10.1314	10.0827	9.98637	9.78491	9.75219	9.74449	7.99231	7.84002	7.64323	9.83862	9.95759	9.87521	9.63222	9.83644	9.89238	9.81717	9.95705	9.82375	9.53996	9.41889	9.5339	NM_020726 // ENST00000380985 // AK292803 // ENST00000340159 // ENST00000514991 // ENST00000506539 // ENST00000506799 // ENST00000506677 // ENST00000507201	NLN	neurolysin (metallopeptidase M3 family)	57486
16751893	-0.0267017	0.982961	-0.191023	0.820833	0.719175	0.00552637	0.554854	0.0415873	-1.43671	7.11758e-07	-0.250503	0.640398	0.359742	0.25826	1.54595	2.74849e-07	0.464658	0.101447	0.105225	0.920672		3.27716	3.43845	3.45513	3.35514	3.23479	3.59712	3.56184	3.17956	3.16841	3.19465	3.55022	3.37608	4.81695	4.73897	4.61033	4.85128	4.62797	4.72283	5.00137	5.46265	5.16265	6.33154	6.82861	6.63799
16697018	0.236852	0.678355	-0.0672302	0.926018	0.211845	0.291062	-0.0922374	0.795156	-1.4277	8.18585e-09	-0.505059	0.0158427	0.242659	0.302579	1.1653	1.45142e-07	0.218021	0.388421	0.248835	0.481236		5.65638	5.20217	5.01981	5.61553	4.7944	5.17184	5.27259	5.33555	5.4504	9.53869	9.33512	9.43283	5.43823	5.54944	5.89933	5.58207	5.47447	5.74219	5.34098	5.66032	5.60961	8.64924	8.92324	8.98816	NM_001099660 // NM_001099658 // NM_018334 // ENST00000451085 // ENST00000422987 // ENST00000308478 // BC035133	LRRN3	leucine rich repeat neuronal 3	54674
16654587	-0.203004	0.917392	-0.313303	0.860658	-0.147344	0.837596	-0.257642	0.794871	-1.42748	0.00195455	-0.30939	0.830628	-0.0108891	0.99472	1.1072	0.0151851	-0.410779	0.63802	-0.274324	0.885595		9.16966	9.20215	9.25145	9.16628	9.10268	9.22729	8.98534	9.00165	9.11332	7.42183	7.223	7.52745	9.19665	9.33509	9.29148	9.30685	9.30009	9.36647	8.87485	9.05755	9.017	8.60934	8.55709	8.532	NM_004205 // NM_171997 // ENST00000260187 // ENST00000313870 // AF440755 // BC041366 // AK301805 // AK292255 // BC002955 // BC002854 // AF079564 // ENST00000455332 // ENST00000392808	USP2	ubiquitin specific peptidase 2	9099
16837087	-0.216999	0.685836	-0.0169763	0.985219	-0.285869	0.112099	-0.0858467	0.799195	-1.42458	3.76504e-09	-0.374604	0.0818252	-0.16195	0.529438	0.888021	2.62519e-06	0.0828085	0.827134	0.206728	0.573927		4.31453	4.17334	4.25914	4.26251	4.27651	4.12649	4.09727	4.48305	4.28951	4.34003	4.18577	4.12473	6.21408	6.28891	6.308	6.01291	6.29543	6.50676	6.77357	6.89385	6.71953	6.48622	6.39955	6.50712	NM_001006657 // NM_020779 // ENST00000345530 // ENST00000281405 // BC036659 // ENST00000414212 // ENST00000416055 // ENST00000445063 // ENST00000494964	WDR35	WD repeat domain 35	57539
16958786	0.206784	0.625706	-0.042701	0.934221	-0.370907	0.00383047	-0.620392	1.73669e-05	-1.42164	4.47977e-11	-0.347629	0.0155569	-0.889029	1.02683e-07	0.184985	0.109157	0.270918	0.0413886	-0.247205	0.173054		7.4537	7.23937	7.36454	7.88865	7.61388	7.70364	7.65826	7.45544	7.55748	5.08637	5.24313	4.98277	7.78468	8.02769	8.04552	7.72571	7.94002	8.0187	7.88637	8.06162	7.73766	7.35421	7.27091	7.1044
16670739	0.0277007	0.952602	-0.059422	0.874344	-0.374073	0.0009511	-0.461196	0.000111674	-1.42097	5.67857e-12	-0.172648	0.294826	-0.0862623	0.618924	1.16206	8.84479e-11	-0.237865	0.0382406	0.0499461	0.906994		8.19838	8.14055	8.03576	8.16563	8.27386	8.18887	8.26335	8.36588	8.37933	9.73795	9.68298	9.72292	8.34186	8.30613	8.33539	8.21766	8.15342	8.28004	8.29975	8.37995	8.39802	8.45612	8.36557	8.55127	NM_001715 // ENST00000259089 // BC007371 // ENST00000427279	BLK	B lymphoid tyrosine kinase	640
16660401	0.263721	0.68364	-0.288869	0.671115	1.09882	6.64305e-06	0.546229	0.0117932	-1.41921	5.41995e-08	-0.813171	0.000613793	-0.367347	0.119447	0.238688	0.230182	1.30172	6.34334e-07	-0.164445	0.791137		12.0161	12.1817	12.0863	11.937	12.1286	11.9633	11.8254	11.8686	11.8196	10.3609	10.2756	10.1332	11.954	11.8084	11.8218	11.708	11.8382	11.8432	11.6971	11.689	11.6959	11.5163	11.4002	11.4818	NM_002736 // ENST00000265717 // BC075800 // ENST00000393613	PRKAR2B	protein kinase, cAMP-dependent, regulatory, type II, beta	5577
17118728	0.217526	0.838282	-0.295279	0.765574	0.497441	0.12153	-0.0153647	0.984657	-1.41256	9.89529e-06	-0.461759	0.340499	0.309475	0.486671	1.26028	4.30028e-05	0.288296	0.554056	0.100331	0.940299		8.92527	8.93776	8.86295	8.9385	8.96041	8.90578	8.1428	8.32275	8.28639	8.15653	8.17769	7.90714	9.42552	9.5014	9.34664	9.46066	9.37698	9.39123	9.59766	9.64861	9.60181	9.64428	9.85871	9.69573	NM_001136191 // NM_015493 // ENST00000355150 // ENST00000432929 // ENST00000439675 // AB284125	KANK2	KN motif and ankyrin repeat domains 2	25959
17096436	0.0727979	0.866716	0.100738	0.79442	-0.329519	0.00586157	-0.301579	0.0138406	-1.40972	1.96268e-11	-0.424817	0.00141884	-0.0443952	0.853606	0.940511	5.75158e-09	-0.158355	0.292693	0.126769	0.638732		11.0113	11.0634	10.9067	10.9916	11.0218	10.9029	11.3208	11.3882	11.3238	12.3343	12.291	12.2549	11.1727	11.1265	11.1128	11.0884	11.1346	11.0957	11.2435	11.2691	11.1419	11.0843	10.9373	11.0062	NM_001131007 // NM_015196 // ENST00000409663 // ENST00000409959 // BC131505 // ENST00000361316 // ENST00000440693 // ENST00000425772 // ENST00000445960	KIAA0922	KIAA0922	23240
17003050	-0.0159097	0.980243	-0.101386	0.815418	0.0827463	0.611065	-0.00272951	0.993998	-1.40873	1.01961e-10	-0.22629	0.234245	-0.0674298	0.785516	1.11501	2.7151e-09	0.0171508	0.963604	-0.133025	0.682606		10.1671	10.105	10.056	10.1175	10.1028	10.0314	10.0356	10.159	10.1803	11.628	11.5763	11.5278	10.0839	10.0776	10.0843	10.0969	10.0817	10.0848	9.48696	9.7472	9.64625	10.2635	10.4068	10.3843	NM_015221 // ENST00000342239 // ENST00000324109 // ENST00000393570 // AL833283 // ENST00000370423 // ENST00000422692 // ENST00000472036	DNMBP	dynamin binding protein	23268
16760200	0.462076	0.582411	0.0563403	0.959377	0.781269	0.00199442	0.375534	0.208379	-1.40131	6.36279e-07	-0.477803	0.14128	0.265078	0.444961	1.18859	5.81374e-06	0.829102	0.00111237	0.31291	0.535081		4.58238	4.58571	4.42996	4.97406	4.65764	4.89726	4.34078	4.38489	4.23839	7.85321	8.52701	8.23399	4.91443	5.26998	5.12852	5.04505	4.77576	4.87698	5.05793	5.38222	4.59151	6.57259	6.75971	6.34764	ENST00000484817	IGKV2-24	immunoglobulin kappa variable 2-24
17099699	-0.132156	0.935435	0.0735698	0.968124	-0.33639	0.466881	-0.130664	0.882975	-1.39887	0.000213166	0.208062	0.863301	-0.167496	0.83389	1.43944	0.00017697	-0.118661	0.904796	0.0502329	0.983776		9.99563	9.90903	9.7609	10.1143	10.0716	9.8667	10.1525	10.2293	10.2007	7.866	7.8205	7.5384	10.5365	10.2709	10.4217	10.3585	10.4066	10.4322	10.1519	9.92635	9.88717	7.60641	7.35635	7.18841
16696614	0.0324179	0.969499	-0.108168	0.869612	-0.133467	0.548595	-0.274053	0.234092	-1.39211	1.56066e-08	-0.431975	0.0544137	-0.0573293	0.887703	0.902801	5.70845e-06	0.0105235	0.985199	0.086661	0.905062		7.12056	7.19	6.95772	7.21454	7.41437	7.20688	7.86	8.1458	8.04527	8.93729	8.83574	9.07483	6.72619	6.21913	6.46475	6.36615	6.23443	6.43852	6.86721	6.50128	6.58592	6.23918	5.76617	5.90592
17099695	-0.0903863	0.956137	-0.0467296	0.980554	-0.233987	0.621587	-0.19033	0.798832	-1.39088	0.000147523	0.219203	0.845078	-0.227638	0.734661	1.38245	0.000176455	-0.0823686	0.935914	-0.0760205	0.969732		9.94141	9.88005	9.98042	10.0936	9.98517	9.90161	10.3615	10.6005	10.553	8.97138	8.90923	8.82463	10.1187	10.103	10.1319	10.149	10.0947	10.0348	10.1734	10.317	10.1783	9.68123	9.52972	9.52854	NR_027406	LOC100129034	hypothetical LOC100129034	100129034
16689704	0.0583614	0.983497	0.0809243	0.978089	-0.628424	0.315527	-0.605861	0.453846	-1.38826	0.00598616	-0.156123	0.938879	-1.00966	0.116975	0.222473	0.737806	-0.0269072	0.988153	-0.408146	0.823638		10.174	10.2102	9.89597	10.0734	10.314	10.0628	10.1588	10.3342	10.2974	7.15734	7.20341	7.37563	10.9577	10.4434	10.6986	10.942	10.7039	10.6694	11.1598	10.7691	10.6775	9.72939	9.4985	9.67127	NM_177532 // NM_201431 // ENST00000307439 // ENST00000342081 // BC058835 // ENST00000395777 // ENST00000335049 // ENST00000512591	RASSF6	Ras association (RalGDS/AF-6) domain family member 6	166824
16711426	0.191773	0.664526	-0.0275787	0.966078	0.988914	1.4379e-07	0.769562	4.31759e-06	-1.3866	2.84428e-10	-0.375666	0.0194017	-0.000726232	0.99835	1.01021	2.49356e-08	1.17635	1.02506e-08	0.186714	0.498551		7.82513	7.48845	7.56431	7.7356	7.74212	7.65708	7.72082	7.73889	7.93638	5.84917	5.79172	5.78485	7.89535	7.78567	7.94659	7.71365	7.92989	7.93302	7.61012	7.68318	7.68219	6.80728	7.03236	6.78542	NM_181727 // ENST00000334325 // AY221117	SPATA12	spermatogenesis associated 12	353324
17125652	0.114587	0.80005	-0.049004	0.931787	0.113112	0.489261	-0.0504791	0.868459	-1.37993	3.11477e-10	-0.102624	0.77061	0.0552703	0.845929	1.33258	4.75622e-10	0.136453	0.530959	0.0786115	0.878647		5.13762	5.0483	4.92896	4.99138	4.98968	5.06093	6.51007	6.64976	6.75611	7.24327	7.04703	6.99748	4.93604	5.0518	4.97809	4.84114	4.81865	4.92552	4.87421	4.81221	5.23356	5.0645	4.91516	4.91272	NM_001390 // NM_032975 // NM_032978 // NM_001391 // NM_032979 // NM_032980 // NM_001392 // NM_001128175 // NM_032981 // ENST00000399121 // ENST00000444659 // ENST00000283365 // ENST00000399097 // ENST00000399113 // ENST00000348997 // ENST00000269191 // ENST00000399111 // ENST00000450377 // ENST00000315456 // ENST00000399108 // ENST00000269192 // ENST00000269190 // ENST00000399119 // ENST000003991…	DTNA	dystrobrevin, alpha	1837
16764127	-0.106409	0.894512	-0.117803	0.874179	0.00668544	0.985263	-0.00470881	0.993512	-1.37662	1.25376e-07	-0.388893	0.188608	0.0748105	0.867369	1.06253	4.23256e-06	-0.204217	0.543982	-0.136092	0.852211		9.3619	9.33587	9.54964	9.3955	9.42876	9.25982	8.45988	8.78105	8.55697	7.78223	8.11981	7.82651	9.50057	9.4447	9.78846	9.29893	9.44504	9.63364	10.0143	10.2302	10.2544	10.3788	10.4446	10.448
16748788	-0.00273448	0.99442	-0.0275455	0.940092	-0.0568497	0.59809	-0.0816607	0.542061	-1.37576	4.56017e-13	-0.181186	0.111042	0.00935855	0.967568	1.20393	2.71775e-12	-0.0424976	0.826268	0.0237106	0.951118		11.2062	11.0541	11.1574	11.1389	11.1863	11.0885	10.9635	10.8434	10.8593	9.09616	9.17298	8.96793	10.955	11.039	10.9537	10.5799	10.9181	10.9834	11.0907	11.082	11.1579	10.9035	10.8858	10.8878	NM_006467 // ENST00000399107 // ENST00000504930 // AK295434	POLR3G	polymerase (RNA) III (DNA directed) polypeptide G (32kD)	10622
16986423	-0.00057206	0.999059	-0.0586599	0.874179	-0.0530272	0.698542	-0.111115	0.467437	-1.37226	6.6855e-12	-0.228959	0.0849987	0.176648	0.152233	1.31995	9.9564e-12	-0.0187629	0.94962	0.210913	0.167667		8.25445	8.34431	8.26818	8.33787	8.49351	8.49646	6.17112	6.44075	6.39433	7.17035	7.58078	7.317	7.95527	7.95434	7.99158	7.8983	7.85881	7.95575	7.71831	7.78118	7.78782	7.80339	7.79164	7.84643	NM_005964 // ENST00000269243 // BC144668 // BC150634 // BC117690 // BC117691 // AB210026 // ENST00000379980 // ENST00000396239 // U15618 // ENST00000459986 // ENST00000476737 // ENST00000465458 // ENST00000472728 // ENST00000360416 // ENST00000488329	MYH10	myosin, heavy chain 10, non-muscle	4628
16716124	0.00389346	0.998401	-0.15533	0.92034	1.25338	0.00204315	1.09415	0.00782343	-1.37016	0.000243417	-1.60178	0.000413392	0.669833	0.141215	0.438216	0.250471	0.859535	0.0397396	0.275991	0.831431		7.42882	7.28365	7.43684	7.52511	7.82983	7.47722	5.20155	5.13086	5.26519	5.18965	5.17961	5.03728	6.485	6.27476	6.24328	6.21397	6.24906	6.34647	6.87824	6.71546	6.56637	6.59958	6.49503	6.47017	NM_000204 // ENST00000394634 // J02770 // ENST00000512148 // ENST00000504853 // ENST00000515512	CFI	complement factor I	3426
16654543	0.0897402	0.940934	-0.0639527	0.962023	0.137027	0.72469	-0.0166659	0.982827	-1.37014	1.00992e-05	-0.189572	0.818969	-0.368458	0.352241	0.812113	0.00273101	0.302338	0.505041	-0.203147	0.836867		6.88917	7.21578	7.1333	7.49815	7.41931	7.32942	9.48985	9.8441	9.98022	10.5031	10.3953	10.3589	7.83607	7.60019	7.66582	7.60567	7.57466	7.58643	7.62614	7.29643	7.30402	8.78851	8.63253	8.90901	NM_021244 // ENST00000369415 // AK289799 // ENST00000359203 // ENST00000492783	RRAGD	Ras-related GTP binding D	58528
16797241	0.0561817	0.904563	0.0487973	0.919482	0.0685354	0.659773	0.061151	0.799448	-1.36382	5.98956e-11	-0.211006	0.233985	-0.0589607	0.803318	1.09386	1.29727e-09	0.0829744	0.719535	-0.0445217	0.933848		9.37183	9.38678	9.18136	9.43022	9.44142	9.33424	10.9708	11.0803	10.9837	10.1094	10.2338	10.056	10.4386	10.6403	10.6239	10.3959	10.5963	10.5869	10.8068	10.7909	10.7519	10.2666	10.2118	10.1879
16912597	0.0547049	0.947463	-0.202181	0.746457	1.78497	3.47373e-09	1.52808	3.52637e-08	-1.3591	4.01715e-08	-0.286258	0.358488	0.154199	0.619302	1.22704	1.67128e-07	1.82369	2.14498e-09	0.192915	0.68921		9.31433	9.02809	9.01845	9.29998	9.10961	9.10318	8.08907	8.23496	8.19734	6.16542	6.21507	6.09146	9.37005	9.55858	9.49057	9.20776	9.45122	9.55259	8.40421	8.47849	8.50318	7.23278	7.11457	7.13972	NM_001099 // NM_001134194 // ENST00000336375 // ENST00000351273 // BC016344 // ENST00000512463 // ENST00000493235 // ENST00000489084 // ENST00000483689	ACPP	acid phosphatase, prostate	55
17086048	0.0216227	0.988147	-0.031045	0.984761	2.89553	1.70901e-09	2.84286	2.60368e-09	-1.35352	1.34982e-05	-0.434081	0.379396	-1.3159	6.46873e-05	-0.396457	0.16062	3.01029	8.30101e-10	-1.20114	0.000689355		10.2611	9.96163	10.0657	10.431	10.2075	10.2957	10.8511	10.8588	10.7749	8.23659	7.9484	8.09332	10.6272	10.0547	10.4784	10.5586	10.2388	10.5643	10.7386	10.6943	10.7999	10.3319	10.0697	10.1544	BC062335 // ENST00000390545	IGHG2	immunoglobulin heavy constant gamma 2 (G2m marker)	3501
17008544	-0.00257563	0.996078	-0.100725	0.794795	-0.05505	0.719696	-0.153199	0.321229	-1.35174	3.97953e-11	-0.22093	0.165882	-0.356011	0.00316512	0.7748	9.56868e-08	0.199056	0.142889	-0.101905	0.752293		10.749	10.9266	10.6501	10.6839	10.7481	10.4457	10.7805	10.562	10.6384	11.4749	11.4084	11.2355	10.5514	10.5914	10.4449	10.3313	10.5661	10.3337	9.79539	9.89357	9.84077	8.64792	9.15928	8.89395
16765226	0.094299	0.84326	-0.10164	0.824769	0.509129	0.000419625	0.31319	0.0310712	-1.34978	3.05485e-10	-1.19729	1.66273e-08	0.356204	0.0112789	0.508697	0.000129265	0.290767	0.0452356	0.137842	0.682606		9.99575	9.8028	9.93155	9.8851	9.8513	9.85927	10.0336	9.90965	10.0053	11.4222	11.1435	11.1243	9.7429	9.68677	9.71893	9.76281	9.77903	9.757	9.79115	9.76367	9.74694	9.74382	9.78723	9.73736	NM_013314 // NM_001114094 // ENST00000224337 // ENST00000371176 // ENST00000428924 // AF068180 // AF068181 // BC018906 // AK225546 // ENST00000393898 // ENST00000413476 // ENST00000427367 // AM180336 // ENST00000453821 // ENST00000393889 // ENST00000393894 // ENST00000467799 // ENST00000485193 // ENST00000472763	BLNK	B-cell linker	29760
16760516	0.0138808	0.981026	-0.0361947	0.94227	-0.132417	0.314602	-0.182493	0.208609	-1.34861	4.68007e-11	-0.266198	0.0698946	0.0483009	0.841679	1.13072	5.17227e-10	-0.199654	0.148914	-0.0189357	0.977754		5.5773	5.46128	5.4356	5.51418	5.43065	5.47748	5.50548	5.36722	5.29106	5.47647	5.60986	5.44583	6.13234	6.52874	6.18327	6.10007	6.35425	6.22718	7.61743	7.67113	7.4276	7.23825	7.32364	7.23781
17066892	0.0847095	0.84483	-0.100588	0.803118	0.151607	0.260046	-0.0336909	0.905723	-1.34852	7.52185e-11	-0.699835	7.16803e-06	-0.131722	0.453369	0.516966	3.48459e-05	0.244211	0.0697046	-0.0391179	0.942704		8.6123	8.62992	8.46467	8.67495	8.6352	8.62342	8.65165	8.69295	8.59548	9.35878	9.34574	9.41157	8.11054	8.1746	8.23054	8.10124	8.18078	8.15459	8.12559	8.12046	8.08928	8.23744	8.15793	8.11294
16731754	-0.0139654	0.98685	0.0770103	0.898672	0.396803	0.0189051	0.487779	0.00468954	-1.33936	5.06722e-09	-1.87871	4.46666e-10	0.412543	0.0159631	-0.126801	0.459832	0.286145	0.130149	0.301885	0.234459		6.31434	6.23586	6.13972	6.05091	5.78724	6.09886	6.49306	6.60165	6.12962	6.72081	6.11282	6.77488	9.47973	9.64551	9.88587	9.53887	9.4079	9.52235	8.36888	8.44724	8.39905	8.3055	8.12534	8.34984	NM_015868 // ENST00000342376 // U24074 // ENST00000434419	KIR2DL3	killer cell immunoglobulin-like receptor, two domains, long cytoplasmic tail, 3	3804
16873221	0.00835286	0.98982	-0.0564043	0.914108	0.0450272	0.809876	-0.01973	0.951732	-1.338	3.11477e-10	-0.543602	0.000476033	-0.273354	0.0630533	0.521048	9.13355e-05	0.28274	0.0512504	-0.0356412	0.952514		9.17531	9.14503	9.21345	9.26277	9.28436	9.25931	9.15247	9.03915	9.1838	7.97203	7.77228	7.75461	9.43283	9.41725	9.52545	9.37498	9.55615	9.54287	9.47181	9.51586	9.42364	9.24902	9.21986	9.21037	NM_015163 // NM_052978 // ENST00000298355 // ENST00000360392 // AK055388	TRIM9	tripartite motif-containing 9	114088
16696531	-0.143872	0.816836	0.106578	0.872313	0.138831	0.530251	0.389281	0.054466	-1.33665	2.94656e-08	-0.112623	0.832867	0.295172	0.182475	1.5192	4.66001e-09	-0.212125	0.424963	-0.0557832	0.945564		7.70028	7.66214	7.71528	7.79824	7.84439	7.63871	7.36642	7.61331	7.475	9.28718	9.48096	9.31476	7.55559	7.67795	7.56503	7.06486	7.46872	7.43464	7.61183	7.75151	7.489	7.31969	7.29269	7.19226	NM_003263 // ENST00000308979 // ENST00000502213 // AK292982 // BC089403 // BC109093 // BC109094 // AB445617 // U88540 // DQ012254 // DQ012263 // DQ012264 // DQ012255 // DQ012256 // DQ012257 // DQ012258 // DQ012259 // DQ012260 // DQ012261 // DQ012262 // CR533562 // ENST00000506146 // ENST00000515861 // ENST00000505940 // ENST00000508364 // ENST00000505744 // ENST00000509754 // ENST00000508535 // E…	TLR1 // LOC100510243	toll-like receptor 1 // hypothetical LOC100510243	7096 // 100510243
16800506	0.100681	0.804017	-0.0486813	0.920584	0.0172898	0.929819	-0.132072	0.459986	-1.3357	9.73786e-11	-0.16818	0.431886	-0.0570843	0.815537	1.11043	1.28797e-09	0.131647	0.478167	0.0572729	0.907066		8.61382	8.62671	8.47454	8.66951	8.63455	8.61516	8.64694	8.68233	8.58253	9.35706	9.34057	9.41374	8.09497	8.16825	8.23029	8.09572	8.18282	8.15407	8.09936	8.1142	8.10984	8.24967	8.15361	8.14379	NM_004761 // NR_028387 // ENST00000383204 // ENST00000413136 // ENST00000416548 // ENST00000497454 // ENST00000452084 // BC040989 // BC032681 // AB012295 // AK294442 // ENST00000456630 // ENST00000454163 // ENST00000426852 // ENST00000421215 // ENST00000441862 // ENST00000419042 // ENST00000448564 // ENST00000444031 // ENST00000455072 // ENST00000446570 // ENST00000412959 // ENST00000425946 // EN…	RGL2	ral guanine nucleotide dissociation stimulator-like 2	5863
16832695	0.0813262	0.885034	0.056642	0.924762	0.113501	0.529062	0.0888171	0.751665	-1.33321	1.69599e-09	-0.341049	0.0682874	-0.155998	0.477004	0.836161	1.12905e-06	0.0490083	0.894517	-0.220491	0.421679		8.61382	8.62671	8.47454	8.66951	8.63455	8.61516	8.64694	8.68233	8.58253	9.35706	9.34057	9.41374	8.09497	8.16825	8.23029	8.09572	8.18282	8.15407	8.09936	8.1142	8.10984	8.24967	8.15361	8.14379
16656537	-0.18217	0.897934	-0.430236	0.717812	-0.178154	0.712528	-0.42622	0.408621	-1.33196	0.000178443	-0.00434399	0.999252	-0.192661	0.782152	1.13496	0.00099703	-0.174305	0.832925	-0.188812	0.895041		8.61382	8.62671	8.47454	8.66951	8.63455	8.61516	8.64694	8.68233	8.58253	9.35706	9.34057	9.41374	8.09497	8.16825	8.23029	8.09572	8.18282	8.15407	8.09936	8.1142	8.10984	8.24967	8.15361	8.14379
16681408	0.130618	0.933334	-0.0186339	0.993434	-0.480768	0.249536	-0.63002	0.165337	-1.32811	0.000256562	-0.772902	0.123921	-0.106546	0.902241	0.448662	0.222649	-0.963133	0.0153658	-0.588911	0.377252		8.61382	8.62671	8.47454	8.66951	8.63455	8.61516	8.64694	8.68233	8.58253	9.35706	9.34057	9.41374	8.09497	8.16825	8.23029	8.09572	8.18282	8.15407	8.09936	8.1142	8.10984	8.24967	8.15361	8.14379
16927856	-0.00355379	0.99707	0.173139	0.827887	-0.590954	0.014181	-0.414262	0.126158	-1.32768	7.71236e-07	-0.196494	0.724677	-0.840196	0.000635687	0.290988	0.193362	0.0611388	0.92007	-0.188103	0.788521		9.4828	9.51726	9.5335	9.60566	9.5198	9.46942	9.64492	9.69343	9.65467	11.181	11.2783	11.2532	9.87906	9.67292	9.64526	9.54042	9.57846	9.66613	9.81542	9.71853	9.51306	9.9455	9.92211	9.97268	NM_002890 // NM_022650 // ENST00000274376 // BC033015 // ENST00000515800 // ENST00000389275 // ENST00000509953 // ENST00000514969	RASA1	RAS p21 protein activator (GTPase activating protein) 1	5921
16654329	-0.0728458	0.93668	0.00330029	0.99764	-0.00746972	0.984496	0.0686764	0.892664	-1.32662	4.24669e-07	0.0258603	0.979537	0.104851	0.81128	1.45734	1.22348e-07	-0.295786	0.314176	-0.183465	0.780944		12.1041	11.9907	12.0804	12.1608	12.0115	12.086	11.8836	11.7121	11.8658	10.4653	10.2934	10.44	11.6508	11.7123	11.6899	11.5315	11.6476	11.6956	11.8066	11.6665	11.7297	11.5523	11.5717	11.5609	NM_006818 // ENST00000368921 // BC022448	MLLT11	myeloid/lymphoid or mixed-lineage leukemia (trithorax homolog, Drosophila); translocated to, 11	10962
17121498	0.157223	0.810873	-0.071761	0.928845	0.762134	0.000320516	0.53315	0.0105833	-1.32587	8.15086e-08	-0.551682	0.01592	-0.0374813	0.938961	0.736703	0.000142482	1.01471	1.0403e-05	0.215091	0.643073		4.08066	4.72283	3.93302	4.51466	4.91237	4.40765	4.98263	3.86989	4.67223	4.2944	4.35113	4.43001	9.08505	9.16994	8.88237	8.62655	8.92099	8.9069	9.0627	9.03284	8.57779	9.35032	9.28199	9.0411	NM_018092 // ENST00000303155 // AY358718	NETO2	neuropilin (NRP) and tolloid (TLL)-like 2	81831
17121360	0.0993747	0.875396	-0.330344	0.601293	0.904075	8.00533e-06	0.474356	0.00859289	-1.32198	1.14706e-08	-0.562765	0.00392805	0.00476239	0.993372	0.763973	1.83981e-05	1.04594	1.06529e-06	0.146631	0.761533		8.57863	8.69028	8.50696	8.49267	8.61865	8.597	7.74419	7.89776	7.82404	9.58925	9.49986	9.53337	8.48434	8.6984	8.64119	8.4665	8.68248	8.66461	8.13372	8.33302	8.16707	8.57497	8.77617	8.65591	NM_001131005 // NM_001193347 // NM_002397 // NM_001193350 // NM_001193348 // NM_001193349 // ENST00000424173 // ENST00000437473 // ENST00000514028 // L08895 // AL833268 // ENST00000510942 // ENST00000514015 // ENST00000513252 // ENST00000506716 // ENST00000507984 // ENST00000502983 // ENST00000502831 // ENST00000503075 // ENST00000510980 // ENST00000515715 // ENST00000511086 // ENST00000515093 //…	MEF2C	myocyte enhancer factor 2C	4208
17122192	0.0824695	0.876057	0.0401514	0.950324	0.289804	0.0575151	0.247486	0.152754	-1.31977	1.31322e-09	-0.175324	0.528465	0.112132	0.641339	1.25658	2.50577e-09	0.187857	0.340099	0.0101846	0.992903		5.10314	4.95232	4.7555	5.03189	4.90702	5.02983	5.48163	5.91995	6.0799	5.82396	6.00192	5.96358	8.13894	8.44995	8.67012	8.15546	8.34487	8.55062	5.2726	4.98063	5.27408	5.13622	5.32871	5.33641	NM_006765 // NM_178234 // ENST00000511783 // ENST00000351598 // ENST00000503731 // ENST00000382020 // ENST00000359666 // U42349 // BC010370 // BT020002 // ENST00000398166 // ENST00000382030 // ENST00000510836 // ENST00000515859 // ENST00000507400 // ENST00000507316 // ENST00000508446 // ENST00000511342 // ENST00000509177 // CR593731 // ENST00000506802 // CR618029 // CR603529 // ENST00000509380 //…	TUSC3	tumor suppressor candidate 3	7991
16704375	0.120337	0.664058	0.0813387	0.776755	0.107488	0.25884	0.0684896	0.634182	-1.31599	7.43567e-13	-0.406255	8.24577e-05	0.0389016	0.822528	0.948635	7.37269e-11	0.261846	0.0034579	0.19326	0.101247		6.30452	6.48703	6.64145	6.39361	6.70276	6.50022	8.04299	8.10519	8.17311	7.36061	7.5421	7.34882	8.47307	8.40907	8.62636	8.50547	8.50403	8.52547	8.19098	8.15234	8.23914	8.10357	8.03356	8.0853
16851801	-0.0394985	0.968842	-0.00305684	0.997713	-0.0313832	0.929025	0.00505848	0.993317	-1.31271	4.64527e-07	0.0900255	0.905369	-1.49421	2.64286e-07	-0.0914662	0.726838	2.13489	1.77665e-09	0.672065	0.0117935		11.0057	11.008	10.97	11.0806	11.0361	11.0345	10.7899	11.0441	10.9283	12.5048	12.5329	12.4781	11.3458	11.1267	11.21	11.4356	11.1885	11.2703	11.1376	11.0886	10.9896	11.2109	11.1357	11.0803	NM_020428 // NM_001145056 // ENST00000335757 // BC040556 // ENST00000380614 // ENST00000407327	SLC44A2	solute carrier family 44, member 2	57153
16809584	0.143268	0.867142	-0.290523	0.69893	-0.23378	0.367592	-0.667571	0.00553896	-1.31247	6.77589e-07	-0.348004	0.340151	0.303933	0.309218	1.26839	1.14337e-06	-0.140715	0.758052	0.396997	0.284654		9.74271	9.77357	9.77297	9.69793	10.0361	9.88252	10.0458	10.1985	10.1915	8.46436	8.62925	8.49853	9.93279	9.88048	9.85835	9.9943	10.0146	9.94908	9.8408	9.68103	9.74445	9.14908	9.256	9.099
17045320	0.120257	0.834904	-0.155855	0.775893	-0.463184	0.00644873	-0.739296	6.57766e-05	-1.31128	7.41305e-09	-0.0486594	0.934465	-0.242228	0.240009	1.02039	2.536e-07	-0.251104	0.215476	-0.0301483	0.972789		11.6947	11.7968	11.8309	11.6458	11.6987	11.8435	11.8488	11.8167	11.8632	8.85375	8.67893	8.8879	11.1172	11.3058	11.301	11.0773	11.2331	11.2854	10.4158	11.12	11.1674	9.51727	9.83648	9.8845	NM_001178126 // NR_033661 // ENST00000390320	IGLL5 // IGLJ1	immunoglobulin lambda-like polypeptide 5 // immunoglobulin lambda joining 1	100423062
16837063	0.350224	0.685836	-0.0324963	0.981345	0.0756456	0.849597	-0.307075	0.432684	-1.31017	7.4709e-06	-0.411183	0.355808	-0.112753	0.841557	0.786238	0.00200278	-0.0886573	0.896304	-0.277056	0.68755		8.14616	8.2832	8.20461	8.23719	8.16781	8.22725	8.17134	8.18261	8.22373	6.83027	6.80245	6.82816	8.1986	8.21267	8.06361	8.11226	8.19109	7.99555	8.48392	8.31764	8.30607	8.15488	8.19087	8.075	NM_130772 // ENST00000513010 // ENST00000317593 // ENST00000429334 // BC022320	S100Z	S100 calcium binding protein Z	170591
16897026	0.085812	0.886795	-0.0222402	0.978991	0.0369851	0.87741	-0.0710671	0.829105	-1.3081	5.45213e-09	-0.194022	0.523201	-0.0688596	0.832755	1.04522	1.30924e-07	-0.077695	0.827671	-0.18354	0.614261		7.21486	7.24319	7.26222	7.17519	7.1217	7.29088	8.89284	9.14595	9.21438	7.86963	8.03424	7.87769	7.2085	7.28476	7.14197	7.11057	7.09912	7.26837	6.75907	6.76926	6.64996	6.17505	5.9894	5.63871	NM_003243 // NM_001195683 // NR_036634 // NM_001195684 // ENST00000212355 // ENST00000417833 // BC126116 // ENST00000370399 // ENST00000470600 // ENST00000468996	TGFBR3	transforming growth factor, beta receptor III	7049
16949991	0.0308868	0.976604	-0.0233652	0.984761	0.15674	0.56758	0.102488	0.824484	-1.30794	5.74598e-07	0.262192	0.545626	-2.07773	2.31327e-09	-0.507593	0.012576	2.22567	1.12279e-09	-0.0087975	0.99663		5.70894	5.70591	5.75021	5.90745	5.7638	5.46307	9.54668	9.3769	10.2316	9.78468	9.94734	10.4507	6.73313	7.23933	6.9513	6.31428	7.0334	6.98618	5.36881	5.65435	5.63438	5.64368	5.53678	5.53626	NM_000073 // ENST00000292144 // AK223314 // ENST00000392883	CD3G	CD3g molecule, gamma (CD3-TCR complex)	917
17075221	0.0688376	0.895955	0.120983	0.79304	0.0243714	0.911372	0.076517	0.772404	-1.30642	6.79571e-10	-0.359819	0.0274446	-0.132077	0.527192	0.814524	5.14866e-07	-0.01579	0.968897	-0.172239	0.558766		8.69728	8.63521	8.87278	8.67667	8.82288	8.72289	7.50661	7.95471	7.91659	7.08368	7.28749	7.10947	8.88247	8.86422	9.09917	8.40472	8.93329	8.96723	9.49635	9.673	9.68126	9.84978	10.047	9.96426
16986433	0.230135	0.580821	-0.0259248	0.961801	-0.0297448	0.865775	-0.285804	0.0246302	-1.3009	8.5224e-11	-0.158413	0.447926	0.201673	0.14811	1.34416	4.66246e-11	0.0979106	0.633691	0.329328	0.0254771		7.79002	7.696	7.69743	7.88743	7.58632	7.78854	7.37279	7.50808	7.54921	9.22929	9.12753	9.33894	7.6487	7.74892	7.81489	7.65955	7.63041	7.73313	7.58985	7.65016	7.70853	7.87926	8.0552	7.80448	NM_018381 // ENST00000253110 // AK096142 // ENST00000397881	C19orf66	chromosome 19 open reading frame 66	55337
16801577	0.0347574	0.980986	-0.00533319	0.9971	1.23359	0.00013172	1.1935	0.000221873	-1.29989	1.93585e-05	-0.213636	0.779445	-1.08129	0.000525542	0.00496463	0.991715	1.74634	1.62972e-06	-0.568546	0.19891		7.57692	7.58117	7.85469	7.86611	7.71711	7.76217	5.87846	6.3478	6.42489	8.3186	8.59501	8.52408	8.78338	8.61382	8.74478	8.42922	8.51016	8.66964	8.81323	8.81753	8.73806	9.90733	9.76761	9.9204	NM_005021 // ENST00000414305 // ENST00000357639 // AK226107 // ENST00000427707 // ENST00000427148 // ENST00000423831 // ENST00000470930 // ENST00000494023	ENPP3	ectonucleotide pyrophosphatase/phosphodiesterase 3	5169
16971499	0.257536	0.779815	0.102464	0.929845	0.892005	0.00249898	0.736932	0.0141034	-1.29867	1.22599e-05	-0.456793	0.294826	0.694756	0.0199813	1.53663	1.60399e-06	0.441056	0.202893	0.243806	0.760889		5.57939	5.13663	5.73356	5.5547	5.6203	5.46177	5.25744	5.62466	5.7257	8.7637	8.6096	8.31313	5.10435	5.36713	5.39767	4.92287	5.26476	5.17987	5.23034	5.80478	5.51943	5.05155	5.20932	5.16691	ENST00000429139	MIR181A2HG	MIR181A2 host gene (non-protein coding)
16686201	0.149398	0.876177	0.0473282	0.970101	0.519333	0.0604375	0.417264	0.197212	-1.29767	5.26174e-06	-0.20236	0.760306	0.309337	0.399331	1.40464	2.12016e-06	0.713329	0.00956294	0.503333	0.209122		11.3022	11.3888	11.395	11.2733	11.3218	11.3308	11.142	11.2224	11.1703	10.1578	10.1727	10.1974	11.1935	11.2365	11.2085	11.1178	11.2134	11.2148	11.1782	11.1665	11.1281	11.1393	11.1278	11.1286	NM_015055 // ENST00000318950 // BC000616 // ENST00000447399	SWAP70	SWAP switching B-cell complex 70kDa subunit	23075
16654591	-0.48479	0.732178	-0.120924	0.952224	-0.220731	0.713916	0.143135	0.89129	-1.29762	0.00196304	-0.150928	0.927112	-0.25316	0.764743	0.893536	0.0314608	-0.406742	0.592869	-0.439172	0.714167		7.10106	7.01902	7.02997	6.88911	7.03491	7.03574	7.10978	6.90365	7.10968	9.65831	10.2747	10.6794	6.93798	6.96031	6.81347	6.74993	6.94356	6.90184	6.89957	7.02065	6.89029	7.04633	6.91307	7.05453	NM_004828 // ENST00000373089 // ENST00000373083 // ENST00000373086 // AJ010100	NCR2	natural cytotoxicity triggering receptor 2	9436
16838330	0.0440725	0.925914	0.0595672	0.889035	0.342731	0.00526823	0.358226	0.00427853	-1.29249	9.23046e-11	-0.656949	1.10262e-05	-0.0589266	0.796842	0.576617	6.54374e-06	0.237728	0.0692052	-0.16393	0.480547		9.50502	9.5795	9.45417	9.6135	9.57192	9.57421	8.87801	9.07009	8.99685	8.35774	8.20271	8.34015	9.48819	9.40529	9.40747	9.325	9.37909	9.40917	9.53489	9.50023	9.55926	9.52046	9.51453	9.50151	NM_032933 // AK294916 // ENST00000399707 // ENST00000473688 // ENST00000477053 // ENST00000460322 // ENST00000497608 // ENST00000482411 // ENST00000475185	C18orf45	chromosome 18 open reading frame 45	85019
16792894	0.0908868	0.793338	0.0328237	0.941769	0.280584	0.0100245	0.222521	0.0551615	-1.29217	1.84058e-11	-0.244022	0.0609958	0.3453	0.00168084	1.39344	5.40751e-12	-0.0527911	0.819836	0.0119254	0.986844		12.5841	12.5819	12.5054	12.5655	12.5538	12.6081	12.7345	12.815	12.7605	11.8076	11.8497	11.8531	12.4918	12.5774	12.526	12.4406	12.5205	12.569	11.4877	11.8115	11.6945	10.4768	10.4722	10.5111	NM_006762 // ENST00000294507 // U51240 // ENST00000424259 // ENST00000464569 // ENST00000476492	LAPTM5	lysosomal protein transmembrane 5	7805
17067393	0.193604	0.796833	0.00921213	0.99469	0.791083	0.000990946	0.606691	0.0118446	-1.28906	8.32538e-07	-0.569996	0.0355503	0.366487	0.179674	1.08555	8.28255e-06	0.966512	0.000107116	0.541916	0.0728457		9.13211	9.26654	9.0803	9.13124	9.26958	9.16141	9.19025	9.28768	9.1784	10.5871	10.5766	10.4895	9.28082	9.37257	9.19103	9.19985	9.27334	9.18482	9.20017	9.17979	9.05027	9.22452	9.20279	9.18028	NM_006738 // NM_007200 // NM_144767 // ENST00000394518 // ENST00000361243 // ENST00000394510 // AF406992 // ENST00000394516 // ENST00000458540 // ENST00000426424 // ENST00000452008 // ENST00000428310	AKAP13	A kinase (PRKA) anchor protein 13	11214
16736855	-0.0732323	0.929698	-0.154575	0.826566	-0.290801	0.192985	-0.372144	0.119319	-1.28731	2.34229e-07	0.0544844	0.942723	-1.58229	3.9413e-08	-0.240488	0.231031	1.084	8.31163e-06	-0.207482	0.689788		12.0733	12.1201	12.1422	12.0597	12.0747	12.1347	12.2236	12.3098	12.2625	9.47455	9.4679	9.54276	11.3327	11.5119	11.5233	11.3946	11.4963	11.4527	10.7134	11.2812	11.3469	9.63956	10.1622	10.1399	BC030984 // BC093098 // ENST00000390325 // ENST00000390323	IGLV1-44 // LOC100290481 // IGLC3 // IGLC2	immunoglobulin lambda variable 1-44 // immunoglobulin lambda light chain-like // immunoglobulin lambda constant 3 (Kern-Oz+ marker) // immunoglobulin lambda constant 2 (Kern-Oz- marker)	28823 // 100290481
17098655	0.127773	0.779815	-0.00640087	0.994131	0.155762	0.324226	0.0215882	0.949694	-1.28564	1.13935e-09	-0.38766	0.0181197	0.0112176	0.976606	0.909196	1.48014e-07	0.091814	0.738095	-0.0527303	0.932302		5.67467	5.45892	5.79929	5.88527	5.72163	5.87454	5.42179	4.96176	5.45196	8.49444	9.02297	9.15631	5.93199	6.48856	6.15944	5.93574	6.2378	6.13115	6.60502	6.59873	6.62415	6.89669	6.48434	6.40444	NM_012258 // NM_001040708 // ENST00000354724 // ENST00000337919 // AF176422 // ENST00000519075 // ENST00000435063 // ENST00000521111 // ENST00000523531	HEY1	hairy/enhancer-of-split related with YRPW motif 1	23462
17123026	0.0446438	0.917392	-0.106219	0.77227	0.376006	0.00121895	0.225143	0.0668395	-1.28502	3.99091e-11	-0.0371336	0.925549	0.0877682	0.625656	1.33565	1.75741e-11	0.14461	0.326505	-0.143628	0.530213		9.5388	9.43179	9.44167	9.57595	9.57197	9.60296	9.751	9.82377	9.76774	7.57868	7.27688	7.17436	10.0777	9.67549	9.82677	10.0108	9.71984	9.77963	9.52496	9.47168	9.38334	8.57907	8.12976	8.22698	NM_016150 // ENST00000315988 // AB488462 // ENST00000434324	ASB2	ankyrin repeat and SOCS box-containing 2	51676
16907488	-0.0230322	0.983261	0.0296487	0.978991	1.97062	5.00191e-09	2.0233	3.73493e-09	-1.28389	4.97174e-07	-0.886386	0.000468489	1.49902	1.94177e-07	1.89652	2.11863e-09	-0.277196	0.350222	-0.748799	0.00373961		9.02731	9.0643	8.99335	8.9484	9.0107	8.88065	9.17476	9.3288	9.20224	11.0498	10.9769	11.0208	9.17136	9.28168	9.18623	8.96478	9.31979	9.17471	8.74628	9.05999	8.92371	9.20782	9.3448	9.39356	NM_004226 // ENST00000409228 // ENST00000263955 // CR542210 // ENST00000449152 // ENST00000420683	STK17B	serine/threonine kinase 17b	9262
17121496	0.136512	0.853294	-0.162261	0.809285	0.859197	0.000115212	0.560423	0.00897629	-1.28316	1.90998e-07	-0.516123	0.032183	-0.040728	0.935321	0.726304	0.00022892	0.996289	1.87885e-05	0.0963641	0.90414		6.99677	6.89672	6.97835	6.9815	6.956	7.13125	7.01205	7.0535	7.18045	8.8515	8.77092	9.0236	6.59949	7.00727	6.65365	6.68522	6.7054	6.67347	6.33466	6.42635	6.58862	6.53324	6.90507	6.73056	NM_175736 // NM_198900 // ENST00000335154 // ENST00000352151 // BC159100 // ENST00000293590	FMNL3	formin-like 3	91010
16671960	0.00192224	0.99707	0.111164	0.790979	0.150558	0.282196	0.2598	0.062375	-1.27955	2.48375e-10	-0.630654	4.10839e-05	-0.0658673	0.782616	0.583033	1.20814e-05	0.478026	0.000381241	0.261601	0.144931		8.68643	8.81262	8.91872	9.11334	9.15728	9.0915	7.44735	7.18687	7.4783	9.35307	8.8034	9.08475	7.06838	6.91207	6.87445	6.90919	7.12951	6.82237	5.92043	6.40006	6.11267	6.39789	6.08609	5.88574
16652569	-0.483937	0.737949	0.131567	0.947972	-0.350323	0.531966	0.265182	0.763655	-1.2782	0.00266521	0.717047	0.335112	-0.734145	0.194105	1.2611	0.00326558	-0.133009	0.911908	-0.516831	0.632038		6.71962	6.6486	6.94789	7.0357	6.69587	6.99647	6.54448	6.38703	6.2735	5.46672	5.28686	5.33125	6.93152	7.13634	6.91131	6.96937	6.93639	7.13779	7.20671	7.34341	7.15181	7.44478	7.67167	7.79579
16902945	0.0853748	0.931394	-0.0778825	0.939659	-0.705731	0.00532947	-0.868989	0.000917805	-1.27621	2.41077e-06	-1.59205	1.28645e-06	1.08228	6.46873e-05	0.76644	0.000867241	-0.415833	0.147681	1.37217	1.54797e-05		5.56673	5.30232	5.56263	5.61193	5.37204	5.25808	5.00925	5.12383	4.46864	5.49477	5.14146	5.04348	8.09134	8.36407	8.30144	7.97629	8.01261	8.05442	7.98499	8.22916	8.1989	8.15381	8.44231	8.57781
16885526	0.00930812	0.985545	-0.0453502	0.903768	0.239712	0.0215959	0.185053	0.109598	-1.27551	1.08751e-11	-0.69235	6.19514e-07	0.0207882	0.933454	0.603948	4.09399e-07	0.253403	0.0163131	0.03448	0.937534		4.9398	5.35048	4.82756	5.09951	5.21772	4.76591	6.73337	6.19746	6.48488	9.774	9.68733	9.57648	5.75042	5.29405	5.65087	5.44335	5.3189	5.2858	6.39242	6.4278	6.3142	7.85452	8.25968	8.04455	ENST00000433072	IGHV3-72	immunoglobulin heavy variable 3-72
16656599	-0.175263	0.927047	-0.244947	0.887823	-0.14035	0.839366	-0.210035	0.833567	-1.27389	0.00366478	-0.219748	0.889338	-0.000674371	0.999582	1.05346	0.0162237	-0.153274	0.898239	-0.0135978	0.997027		3.54837	3.66781	3.83803	3.721	4.01988	3.65918	4.08655	3.80161	3.69499	3.62578	3.866	3.81717	3.6799	3.94693	4.05479	4.02814	3.83814	3.55205	6.03583	6.10149	5.78975	6.77988	7.52532	7.28444
16742244	0.0706724	0.872575	0.0523837	0.903043	0.328405	0.00612324	0.310116	0.0115136	-1.27158	8.28118e-11	-0.731144	1.80707e-06	0.241857	0.0559286	0.78229	8.05474e-08	0.310515	0.00998602	0.223967	0.197602		10.5223	10.4938	10.4465	10.5386	10.5417	10.4102	10.7096	10.7461	10.7671	9.57965	9.41096	9.40566	10.6839	10.766	10.7318	10.6014	10.6629	10.7813	10.6873	10.7879	10.81	10.0915	10.0524	10.0642	NM_033416 // ENST00000259239 // AF054996 // ENST00000456713 // ENST00000462392 // ENST00000460100 // ENST00000464432 // ENST00000490895 // ENST00000473689 // ENST00000475074 // ENST00000462357 // ENST00000470672 // ENST00000477375 // ENST00000495606	IMP4	IMP4, U3 small nucleolar ribonucleoprotein, homolog (yeast)	92856
16945124	-0.121539	0.873896	0.0560341	0.949739	-0.386014	0.0681872	-0.208441	0.485459	-1.26904	2.10637e-07	0.0320422	0.969078	-2.31082	1.05169e-10	-1.00974	4.63048e-06	1.88647	2.82208e-09	-0.0383396	0.971452		10.8338	10.8246	10.7991	10.8964	10.8336	10.9613	11.1095	11.1044	11.0468	10.0586	9.98408	10.0143	10.9322	11.056	10.9898	10.9444	10.9138	11.016	10.9561	10.9708	11.0021	10.8589	10.8264	10.7738	NM_002405 // NM_001166343 // NR_029413 // ENST00000416983 // ENST00000356998 // ENST00000436341 // BC094814 // ENST00000431211 // ENST00000450946 // ENST00000438891 // ENST00000430411 // ENST00000442496 // ENST00000489515 // ENST00000466943	MFNG	MFNG O-fucosylpeptide 3-beta-N-acetylglucosaminyltransferase	4242
16655753	-0.924947	0.754249	0.0928646	0.985292	-0.354945	0.780292	0.662866	0.684277	-1.26816	0.142602	0.109412	0.979503	-0.0755304	0.975961	1.30204	0.139017	-0.121227	0.964018	0.158188	0.97518		7.7476	7.74445	7.80233	7.83045	7.8856	7.89967	8.61953	8.76298	8.81643	7.26953	7.26498	7.27116	8.00765	8.19047	8.10302	8.11496	8.07049	8.09693	7.85649	8.1826	8.04981	7.66463	7.70708	7.59831	NM_207514 // NM_017702 // ENST00000268676 // ENST00000430201 // ENST00000455613 // ENST00000418391 // AK295880 // ENST00000428717	DEF8	differentially expressed in FDCP 8 homolog (mouse)	54849
16750523	0.0435647	0.919493	-0.00658627	0.992174	-0.121484	0.325794	-0.171635	0.204604	-1.26677	4.47977e-11	-0.25627	0.0583986	-0.119774	0.448767	0.890723	6.15146e-09	0.0563195	0.813826	0.0580297	0.889451		8.19048	8.27181	8.27356	8.38368	8.37826	8.32869	6.82918	6.70428	6.63534	7.65588	7.77404	7.53803	7.24414	7.36182	7.3213	7.31382	7.29154	7.1237	7.22211	7.32651	7.22103	7.29009	7.41486	7.29373	NM_015074 // NM_183416 // ENST00000263934 // ENST00000377083 // ENST00000377093 // AB088210 // AB017133 // AB088211 // AB088212 // AB088213 // AF257176 // AK297439 // BC115395 // AY139835 // AY043362 // BT007174 // BC001415 // ENST00000377086 // ENST00000353409 // ENST00000377081 // ENST00000355249 // AB011163 // AB040881 // AK074279 // ENST00000465635 // ENST00000483340 // ENST00000497835 // AK3…	KIF1B	kinesin family member 1B	23095
17044193	0.0210565	0.988147	0.000920302	0.999216	-0.150031	0.68852	-0.170167	0.75215	-1.26509	2.05749e-05	-0.119591	0.9018	-0.287768	0.501229	0.857729	0.00141104	0.00293699	0.997951	-0.1348	0.90647		6.64881	6.68112	6.75101	6.64993	6.70921	6.7422	6.64722	6.74192	6.93439	9.02837	8.99728	9.43975	7.97597	8.07638	8.15159	7.95753	7.92839	8.36661	8.41913	8.20493	8.31291	8.77928	8.62398	8.62777	NM_004106 // ENST00000289902 // BC033872 // ENST00000367992 // ENST00000490414	FCER1G	Fc fragment of IgE, high affinity I, receptor for; gamma polypeptide	2207
17125762	0.00978239	0.987755	-0.0577114	0.897857	0.370884	0.00326487	0.30339	0.018873	-1.26486	1.77209e-10	-0.0899082	0.771058	0.104929	0.582596	1.27988	1.32096e-10	0.164272	0.301438	-0.101683	0.774107		8.59281	8.74325	8.62181	8.76583	8.55736	8.577	8.73476	8.82	8.62468	10.2881	10.2637	10.4081	8.94871	8.90635	8.77055	8.94953	8.73968	8.77681	8.78494	8.95533	8.74049	8.5988	8.64878	8.74982	NM_004926 // NM_207442 // ENST00000439696 // ENST00000336440 // ENST00000408913 // BC018340 // ENST00000435246	ZFP36L1 // C14orf181	zinc finger protein 36, C3H type-like 1 // chromosome 14 open reading frame 181	677 // 400223
16704239	0.0210217	0.975108	-0.180827	0.694384	-0.12285	0.45197	-0.324699	0.0310256	-1.26351	1.31233e-09	-0.189126	0.437419	-0.131187	0.538175	0.943192	8.09922e-08	0.0944574	0.723585	0.0861201	0.864474		3.89507	3.78761	3.72385	3.65169	3.99299	4.05103	3.92974	3.92569	3.89764	3.73949	3.86941	3.49452	4.33877	4.56437	4.6145	4.33725	4.45754	4.35063	6.47901	7.19732	6.88308	6.77881	7.12694	7.57966
16809574	-0.00531364	0.991444	-0.0276464	0.949144	0.0458229	0.725741	0.0234902	0.919905	-1.26143	9.84703e-12	0.172122	0.23187	1.1561	7.12277e-11	2.58965	4.53458e-16	-0.879686	5.57482e-09	0.230596	0.0820061		6.24667	6.3546	6.31413	6.30038	6.40195	6.31659	6.5074	6.53746	6.42275	7.86721	7.70332	7.80876	6.41938	6.42625	6.34312	6.2783	6.41245	6.27018	6.30465	6.4748	6.23671	6.38595	6.50173	6.42444	NM_138426 // ENST00000223145 // BC050291 // ENST00000456919 // ENST00000438949 // ENST00000489405 // ENST00000474269 // ENST00000470583 // ENST00000482540 // ENST00000492797 // ENST00000496617 // ENST00000460897	GLCCI1	glucocorticoid induced transcript 1	113263
17122536	0.370759	0.796788	0.284431	0.855616	0.798667	0.0814497	0.712339	0.173762	-1.2579	0.0016569	-0.918049	0.102892	0.495602	0.418846	0.835457	0.034825	0.948664	0.0427	0.645598	0.415527		6.67586	6.65265	6.65183	6.83213	6.76741	6.84466	6.02983	6.15144	6.04006	6.17689	6.18975	6.16214	6.92899	7.04942	6.78887	6.75634	6.9266	6.82159	7.45976	7.46963	7.25648	7.58934	7.81417	7.64614	NM_001190737 // NM_001190738 // NM_005596 // ENST00000380959 // AK299605 // BC001283 // U85193 // AK290603 // BT007266 // U70862 // ENST00000397581 // ENST00000397575 // ENST00000380953 // ENST00000397579 // ENST00000380937 // ENST00000380934 // ENST00000380924 // ENST00000380921 // ENST00000493697 // BX648416	NFIB	nuclear factor I/B	4781
17121294	-0.0103881	0.987538	-0.0884739	0.84391	-0.0783005	0.625481	-0.156386	0.369495	-1.25694	3.71104e-10	-0.193383	0.343421	-0.0339915	0.907568	1.02957	6.15146e-09	0.000131286	0.999677	0.0444403	0.936388		11.1924	11.3782	11.3952	11.2978	11.4159	11.4401	11.3185	11.3674	11.2888	10.7557	10.7499	10.7761	11.7413	11.5957	11.6393	11.6752	11.5851	11.6042	11.849	11.7275	11.7456	12.061	11.9741	12.0123	NM_024294 // NM_022758 // ENST00000374023 // ENST00000374026 // BC075810 // ENST00000374021	C6orf106	chromosome 6 open reading frame 106	64771
16658622	0.27134	0.767978	-0.0186244	0.990581	0.78495	0.00819138	0.494985	0.143832	-1.25588	2.17239e-05	0.781675	0.0197645	-0.863528	0.00376692	1.17403	5.30448e-05	1.36068	2.92296e-05	-0.2878	0.691568		11.2781	11.2815	11.3503	11.2402	11.313	11.2207	9.67718	9.72562	9.876	11.3869	11.6062	11.5512	11.3402	11.3344	11.3946	11.1706	11.386	11.3685	11.0913	11.3027	11.2752	11.2098	11.5372	11.4619	NM_012108 // ENST00000265404 // ENST00000396225 // AB023483	STAP1	signal transducing adaptor family member 1	26228
16651885	0.130577	0.960171	-0.356616	0.86723	0.357873	0.636211	-0.12932	0.927173	-1.25531	0.0187899	-0.532107	0.699005	-0.0471317	0.976887	0.676075	0.245351	0.571706	0.549352	0.166701	0.949354		9.34066	9.39803	9.24529	9.38877	9.32739	9.38273	9.5298	9.57749	9.5268	8.48759	8.22423	8.31411	9.70912	9.72679	9.68834	9.7903	9.69789	9.64457	9.56287	9.56925	9.52097	9.60973	9.56179	9.56873	NM_014252 // NR_030352 // ENST00000338625 // AF112968 // ENST00000379523 // ENST00000443985 // ENST00000426521 // ENST00000478827 // ENST00000470509	SLC25A15 // MIR621	solute carrier family 25 (mitochondrial carrier; ornithine transporter) member 15 // microRNA 621	10166 // 693206
17122674	0.523567	0.750897	0.0939919	0.969919	0.971039	0.0774625	0.541464	0.483117	-1.25435	0.00769585	-1.076	0.117887	0.52402	0.498957	0.702376	0.156953	0.989143	0.0928772	0.542124	0.674905		7.30649	7.24463	6.86156	7.35764	7.58848	7.39297	4.99232	4.90073	5.44692	7.87721	7.44304	7.84192	5.25658	4.40352	5.3829	5.07503	5.37528	5.15277	2.94821	3.55067	3.23594	3.0477	3.58471	3.13571
17119752	-0.228747	0.858846	-0.00656573	0.996862	-0.357692	0.368604	-0.135511	0.857946	-1.25433	0.000196921	0.240218	0.799924	-0.203118	0.748612	1.29143	0.000162077	-0.19153	0.795538	-0.0369556	0.987219		9.36774	9.30797	9.34625	9.42768	9.44427	9.41695	9.56719	9.59934	9.51889	10.9059	10.6781	10.6236	9.49333	9.44231	9.49835	9.4441	9.57858	9.44868	9.59953	9.60877	9.52281	9.44187	9.51697	9.44215	NM_006090 // NM_001007794 // ENST00000357172 // BC032610 // ENST00000498239 // ENST00000478042 // ENST00000467362 // ENST00000473474 // ENST00000460443 // ENST00000480324 // ENST00000483427 // ENST00000476865	CEPT1	choline/ethanolamine phosphotransferase 1	10390
16829786	0.174879	0.875924	-0.0198876	0.990449	0.41417	0.211972	0.219404	0.67854	-1.25263	4.50645e-05	0.003534	0.999252	0.363038	0.387396	1.6192	2.13701e-06	0.421277	0.286914	0.370145	0.574714		8.59526	8.60757	8.62968	8.89177	8.44343	8.67716	10.1518	10.1901	10.0486	11.0405	10.8109	10.6639	8.80301	8.89796	8.85264	8.8082	8.83589	8.7206	8.42236	8.68412	8.46892	8.74388	8.9003	8.86104	NM_001006634 // NM_018054 // ENST00000289968 // ENST00000303665 // BC080195 // AK291691 // AK301500 // AK301055 // BC001241 // AF258580 // ENST00000457275 // ENST00000455311 // ENST00000441763 // AK125358 // ENST00000431218 // AL833975 // AK094886 // CR620475 // CR602276	ARHGAP17	Rho GTPase activating protein 17	55114
17116745	0.0641829	0.912156	0.0214119	0.97827	-0.0379765	0.863339	-0.0807476	0.77983	-1.25221	3.72848e-09	-0.855259	7.30853e-06	-0.219338	0.24258	0.177615	0.219742	0.2393	0.184351	0.0579389	0.92836		10.1504	10.3875	10.2699	10.2303	10.357	10.2461	10.0721	10.2827	10.2023	11.6228	11.8318	11.6536	10.8648	10.8571	10.7566	10.7324	10.898	10.7453	10.3898	10.4682	10.3654	10.9901	11.0563	11.0129	NM_007249 // ENST00000377666 // ENST00000377669 // AF330041 // ENST00000342812 // ENST00000472022	KLF12	Kruppel-like factor 12	11278
17062985	0.256075	0.695806	-0.00739134	0.994772	1.57654	8.88304e-08	1.31308	1.11379e-06	-1.24951	5.15912e-07	0.0178909	0.987017	0.144638	0.694032	1.41204	1.01176e-07	1.43518	2.73796e-07	0.00327425	0.997824		8.55279	8.47287	8.505	8.61778	8.58513	8.61327	9.08094	8.99003	9.01026	9.66945	9.61903	9.63463	8.6761	8.66622	8.65293	8.73333	8.56951	8.59603	8.88424	8.79156	8.76651	8.61233	8.44115	8.47285	NR_031766 // NM_017899 // NM_001168325 // ENST00000335209 // ENST00000392545 // AK000614 // ENST00000470612 // ENST00000462502 // ENST00000482176 // ENST00000466376	TESC	tescalcin	54997
16968680	-0.157486	0.780756	-0.197702	0.728299	0.287487	0.120997	0.24727	0.273018	-1.24831	3.68524e-08	-0.0117757	0.990416	-1.60397	2.61781e-09	-0.367432	0.0204373	1.46392	1.32653e-08	-0.427533	0.0601928		10.5275	10.4843	10.5161	10.5345	10.5533	10.5534	10.244	10.2868	10.2044	11.2511	11.213	11.103	10.3246	10.2464	10.1727	10.1049	10.2075	10.1757	10.1631	10.2456	10.0784	10.0122	10.0145	10.1009	NM_007358 // NM_001164392 // NM_001164391 // NM_001164393 // ENST00000370298 // ENST00000370303 // AK290318 // ENST00000471953 // ENST00000467953 // ENST00000489480 // ENST00000474314 // ENST00000494963 // ENST00000497976 // ENST00000476037 // ENST00000487263 // ENST00000473430 // ENST00000468457	MTF2	metal response element binding transcription factor 2	22823
16905590	0.173281	0.675527	-0.15895	0.706004	0.386671	0.00369177	0.0544392	0.838306	-1.24818	4.65214e-10	-0.0256126	0.960201	0.304501	0.0254182	1.52707	2.23161e-11	0.253271	0.0748312	0.171101	0.513987		8.50673	8.50433	8.62133	8.58998	8.52059	8.65575	8.77265	8.6439	8.64967	7.53785	7.40015	7.27317	8.85441	8.95344	8.95256	8.82966	8.85678	8.75531	8.80218	8.74361	8.78374	8.76569	8.65912	8.79331
16821326	0.188784	0.760225	-0.0707554	0.929429	0.414987	0.0411859	0.155447	0.632621	-1.24733	1.64634e-07	-0.212625	0.589892	-0.0114497	0.983499	1.02325	2.48645e-06	0.194909	0.524558	-0.231528	0.591133		9.17937	9.09769	9.29441	9.21388	9.1416	9.17207	9.41553	9.22734	9.36585	8.00571	7.84618	7.79292	9.13739	9.24869	9.26403	9.09066	9.16939	9.11105	9.27415	9.23017	9.19401	9.00079	8.80848	9.00893	NM_017816 // NM_001145725 // ENST00000343470 // ENST00000452476 // BC015796 // ENST00000513174 // ENST00000502917	LYAR	Ly1 antibody reactive homolog (mouse)	55646
16925929	0.0608414	0.929702	0.00481246	0.996092	0.00677506	0.982115	-0.0492539	0.901576	-1.2473	2.94518e-08	-0.771079	0.000144055	-0.113384	0.704256	0.362834	0.0198447	0.346492	0.0669009	0.226333	0.521333		7.51415	7.5408	7.56298	7.65154	7.60421	7.61192	6.81515	6.88423	6.88363	6.60424	6.79497	6.58495	8.02574	8.21387	8.09616	7.90327	8.12319	8.04806	8.12591	8.22636	8.01176	8.16456	8.26946	8.04925	NM_014801 // ENST00000258229 // BC008300 // ENST00000438122 // AK092353 // ENST00000344698 // AB007895 // ENST00000451961 // ENST00000430153 // AK021445 // ENST00000462233 // ENST00000475463 // ENST00000324142 // ENST00000486012 // ENST00000490102 // ENST00000467336 // ENST00000496510 // ENST00000496675 // ENST00000429988 // ENST00000484041 // ENST00000498302 // ENST00000517808 // ENST00000488780…	PCNXL2	pecanex-like 2 (Drosophila)	80003
16832024	0.142133	0.856042	0.00321088	0.99764	-0.371834	0.10176	-0.510756	0.0268573	-1.24695	6.13828e-07	-0.38147	0.21679	-0.677131	0.00240047	0.188347	0.393967	-0.0852317	0.86583	-0.390528	0.247098		6.0859	6.09018	5.97192	5.8752	6.10366	6.14942	5.95466	6.00195	6.06331	6.14508	5.97373	6.01404	8.28466	8.59447	8.68363	8.06133	8.50402	8.46509	6.19765	6.08524	6.37259	6.3478	6.29618	6.37425	AL832737 // AK056600	LOC441178	hypothetical LOC441178	441178
16696533	-0.129848	0.920525	-0.0881338	0.951916	-0.207281	0.618163	-0.165567	0.802162	-1.24552	0.000121302	-0.241818	0.777391	0.109118	0.879726	1.11282	0.000442825	-0.295582	0.591713	0.0208164	0.993333		6.41354	6.41052	6.30781	6.63355	6.4229	6.42746	6.97195	7.12479	7.08551	8.11457	8.20578	7.91974	6.33808	6.16453	6.10141	6.1514	6.23223	6.32195	6.50621	6.43415	6.34901	6.39655	6.46575	6.49568	NM_024408 // ENST00000256646 // AF308601 // ENST00000479412 // ENST00000493703 // ENST00000478864	NOTCH2	notch 2	4853
17121296	-0.0176881	0.976604	-0.0659371	0.887311	-0.0669457	0.692638	-0.115195	0.57466	-1.24533	5.76547e-10	-0.199171	0.336902	-0.0143526	0.966783	1.03181	8.03464e-09	-0.00327743	0.994915	0.0493157	0.93111		7.07066	7.3019	7.01467	7.18302	7.21127	7.07178	7.81009	8.21637	8.0867	9.01235	8.93184	9.22203	6.79323	6.27582	6.44525	6.28599	6.33289	6.17687	6.88167	6.62518	6.26102	6.33123	6.08724	6.19951
17099701	-0.141471	0.923809	-0.00613896	0.997501	-0.310563	0.477426	-0.175231	0.815272	-1.24372	0.000388754	0.168499	0.889281	-0.136555	0.860608	1.27566	0.000338587	-0.174499	0.834132	-0.000490887	0.999684		7.88607	7.74448	7.52699	8.07098	7.88085	7.85084	9.38804	9.8256	9.57808	10.9285	10.8649	10.6198	10.4565	10.2298	10.2663	10.4043	10.3674	10.2422	10.1007	10.1073	9.80263	10.1362	10.1845	9.98816	NM_021813 // NM_001170794 // ENST00000257749 // ENST00000343122 // AF357835 // ENST00000453877 // ENST00000406998 // ENST00000470301 // ENST00000494747 // ENST00000472023	BACH2	BTB and CNC homology 1, basic leucine zipper transcription factor 2	60468
16727616	0.00196842	0.997165	0.0907436	0.84454	-0.203972	0.14334	-0.115196	0.578905	-1.24067	6.51363e-10	-0.327072	0.03593	-0.198982	0.217801	0.714615	1.45813e-06	-0.0303627	0.931534	-0.0253729	0.970767		8.6137	8.56682	8.70682	8.78172	8.60195	8.72206	8.44517	8.47356	8.49355	7.11939	6.98617	7.07755	8.37892	8.18514	8.33473	8.50482	8.27343	8.42275	8.40157	8.46471	8.41281	7.95384	8.09136	7.95944	NM_014788 // NM_033219 // NM_033220 // ENST00000341469 // ENST00000342043 // D50919 // AF220130 // BC006333 // AK292825 // AF220131 // AK303366 // AK097480 // AK055833 // ENST00000375084 // ENST00000311688 // ENST00000375092 // ENST00000478401 // ENST00000475147 // ENST00000478530 // CR594155	TRIM14	tripartite motif-containing 14	9830
16669989	0.0712951	0.934767	-0.138443	0.855476	-0.0490444	0.876136	-0.258782	0.369703	-1.23417	5.40715e-07	-0.152524	0.780509	0.343549	0.172076	1.42519	7.89915e-08	-0.178764	0.619629	0.213829	0.68515		5.8718	5.84956	6.08564	6.44827	6.17619	6.27331	6.79089	7.13164	6.78343	8.58584	8.53311	8.7264	8.66718	8.67099	8.6653	8.19935	8.59881	8.66947	9.00585	8.67818	8.5611	8.90165	8.82189	8.99585	NM_013441 // ENST00000374395 // BC035854 // ENST00000412742 // ENST00000436717 // ENST00000374393 // ENST00000425530 // ENST00000482807	RCAN3	RCAN family member 3	11123
16737580	0.00919894	0.993846	-0.0252169	0.984773	3.12499	3.77875e-11	3.09058	5.42992e-11	-1.23101	4.41154e-06	0.0787193	0.928492	-2.27448	2.54549e-09	-0.964754	8.96939e-05	2.70864	2.48498e-10	-2.69083	1.39931e-09		6.42772	6.57151	6.53344	6.54169	6.62234	6.64036	7.06287	6.69277	6.5436	6.62732	6.93843	6.61638	8.92103	9.05721	9.05149	8.91223	8.74435	8.89359	8.14231	8.02841	8.38496	8.19384	8.36155	8.15216	NM_153443 // ENST00000291860 // AF352324	KIR3DL3	killer cell immunoglobulin-like receptor, three domains, long cytoplasmic tail, 3	115653
16656593	-0.0535869	0.974195	-0.237682	0.849494	0.162281	0.727265	-0.0218134	0.981103	-1.2259	0.000268245	-0.116854	0.926499	-0.0257654	0.978581	1.08328	0.00102317	0.0407896	0.968653	-0.147257	0.92116		11.4594	11.4487	11.3884	11.4073	11.4358	11.3838	11.5398	11.5064	11.46	12.5702	12.5515	12.5512	11.4522	11.6484	11.5511	11.3879	11.5936	11.5672	11.2798	11.4492	11.3928	11.2164	11.3561	11.3036	NM_152309 // ENST00000339364 // ENST00000371110 // AK122584 // ENST00000468783 // ENST00000489982 // ENST00000461252	PIK3AP1	phosphoinositide-3-kinase adaptor protein 1	118788
16708370	0.0292669	0.95485	-0.0580583	0.892726	-0.0675799	0.657199	-0.154905	0.329004	-1.22497	1.99245e-10	-0.309847	0.0269975	-0.223045	0.0976192	0.692081	6.01924e-07	0.124338	0.492507	-0.0311274	0.953818		5.84668	5.82356	5.78858	5.67186	5.81027	5.60585	6.88465	6.83774	7.07042	6.04209	5.82229	5.94272	7.5139	7.30065	7.43075	7.36851	7.35438	7.38373	7.28464	7.39985	7.21934	6.81523	6.79534	6.91285	NM_152637 // ENST00000394252 // AY358508 // ENST00000307755	METTL7B	methyltransferase like 7B	196410
16821365	0.0245731	0.971048	0.0481053	0.936502	0.126242	0.459653	0.149774	0.487473	-1.2242	3.52582e-09	-0.776155	1.77988e-05	0.0515865	0.867369	0.499632	0.000352107	0.170152	0.413254	0.0954964	0.848745		9.66235	9.59035	9.60417	9.56467	9.59969	9.64806	9.49059	9.55482	9.50788	8.34836	8.45642	8.32897	9.4421	9.45128	9.4831	9.51232	9.5175	9.47508	9.40409	9.55329	9.50792	9.30371	9.27075	9.45531	NM_018256 // ENST00000261015 // EF011617 // ENST00000478869 // ENST00000475611 // ENST00000477723 // ENST00000467777 // ENST00000463824 // ENST00000477727 // ENST00000464820	WDR12	WD repeat domain 12	55759
16923549	0.100965	0.909811	-0.0075171	0.995289	0.902617	0.000255395	0.794135	0.00114066	-1.22318	1.70762e-06	-0.286248	0.497231	-0.266832	0.400231	0.670103	0.00160822	0.976515	9.97067e-05	-0.192934	0.769824		8.27011	8.24904	8.45955	8.55105	8.47202	8.47548	8.59091	8.5425	8.6051	7.52957	7.20535	7.25905	8.78798	8.69905	8.65168	8.5024	8.55857	8.6009	8.93487	8.89768	8.81947	8.94092	8.75168	8.88258	NM_181342 // NM_001135212 // ENST00000424785 // ENST00000434643 // ENST00000435079 // AF100751 // ENST00000233092 // ENST00000350591 // ENST00000412612 // ENST00000419184 // ENST00000464248 // ENST00000470945	FKBP7	FK506 binding protein 7	51661
17057525	0.0383077	0.93712	-0.0324784	0.950324	0.159163	0.215141	0.0883764	0.661631	-1.22217	1.90646e-10	-0.839189	3.90735e-07	-0.488109	0.000141441	-0.105123	0.384335	0.818359	2.02421e-07	0.171087	0.432795		8.20576	7.68193	8.00332	8.37891	7.98643	7.93128	7.6652	7.32188	7.43132	6.6155	6.50687	6.31388	9.41763	9.36732	9.35705	8.99111	9.15296	9.39481	9.70035	9.4752	9.35642	9.64297	9.22249	9.31961
16691875	0.18093	0.820486	0.045924	0.966521	0.0555162	0.874269	-0.0794898	0.880454	-1.21914	2.56743e-06	-0.637592	0.019861	-0.11739	0.794635	0.464159	0.0294458	-0.21984	0.564185	-0.392746	0.313968		8.01483	8.09522	7.94608	8.1247	7.96683	8.13602	7.42703	7.56335	7.57312	8.51534	8.32242	8.6113	7.76734	7.98341	7.78492	7.70672	7.75161	7.81715	7.77145	7.95649	7.66514	6.81436	6.70175	6.85526
16692444	0.18093	0.820486	0.045924	0.966521	0.0555162	0.874269	-0.0794898	0.880454	-1.21914	2.56743e-06	-0.637592	0.019861	-0.11739	0.794635	0.464159	0.0294458	-0.21984	0.564185	-0.392746	0.313968		8.59245	8.37337	8.50566	8.5292	8.53432	8.49467	7.92473	7.65988	7.7077	7.19982	7.17284	6.95081	8.79305	8.7657	8.87455	8.68805	8.74528	8.88779	9.11668	8.9173	9.04264	8.72531	8.74001	8.65568	NM_001198625 // NM_001198627 // NM_001198630 // NM_001198631 // NM_001198626 // NM_001198629 // NM_001198628 // NM_001198634 // NM_001198679 // NM_175634 // NM_175636 // NM_001198632 // NM_004349 // NM_175635 // NM_001198633 // ENST00000422361 // ENST00000265814 // ENST00000396218 // ENST00000360348 // D14289 // D14821 // BC005850 // BC067078 // D43638 // AK297616 // BT009871 // CR456792 // ENST0…	RUNX1T1	runt-related transcription factor 1; translocated to, 1 (cyclin D-related)	862
16654521	-0.181514	0.828145	-0.135299	0.874179	-0.161312	0.58902	-0.115098	0.814456	-1.21302	3.96876e-06	0.122797	0.872032	0.0577791	0.919301	1.39359	6.97708e-07	-0.538837	0.0372678	-0.319746	0.519737		11.2379	11.2382	11.1183	11.2075	11.2196	11.2842	11.3747	11.2932	11.3241	10.28	10.0547	10.2286	11.3104	11.3994	11.3592	11.4188	11.3527	11.3637	11.2595	11.2527	11.288	11.1478	11.0888	11.0967	NM_015140 // ENST00000216129 // ENST00000406379 // BC001070 // ENST00000357017 // ENST00000484711 // ENST00000494035 // ENST00000484118	TTLL12	tubulin tyrosine ligase-like family, member 12	23170
16997503	0.0516884	0.931394	0.000648008	0.999061	-0.18261	0.264264	-0.23365	0.196952	-1.21111	5.23275e-09	-0.616111	0.000360707	0.00746577	0.986175	0.60246	5.57002e-05	0.470672	0.00223348	0.660747	0.000238344		9.5671	9.48907	9.53007	9.40863	9.42769	9.34614	9.18336	9.3569	9.1987	10.1032	10.2023	10.1161	7.90989	8.20219	8.06739	7.69776	7.95396	8.05877	8.35272	8.5074	8.10904	8.32097	8.27494	8.23
16725356	-0.012276	0.98743	-0.0712625	0.895481	0.010912	0.965873	-0.0480746	0.886463	-1.21058	5.19379e-09	-0.063782	0.897413	0.0271547	0.940915	1.17395	8.11834e-09	-0.159937	0.470191	-0.143694	0.709219		7.1649	7.78595	7.66037	7.5742	7.67895	8.01099	4.69823	4.59502	4.44357	4.56666	4.70717	4.64833	4.66698	4.3777	4.31341	4.37882	4.61141	4.77022	4.44525	4.47912	4.75197	4.33186	4.53533	4.46488	NM_000686 // ENST00000371906 // U16957	AGTR2	angiotensin II receptor, type 2	186
16651419	0.0916593	0.981166	-0.069048	0.986387	0.90739	0.299662	0.746683	0.533441	-1.21012	0.0905337	-0.10332	0.975867	-0.212592	0.905888	0.894209	0.242726	0.659688	0.624559	-0.460294	0.875078		7.25734	6.98119	6.81223	7.1429	7.11659	7.00452	6.65894	7.07084	6.79902	9.21725	9.14192	9.37398	7.55847	7.50131	7.62479	7.38629	7.67343	7.53821	7.58127	7.7107	7.24341	8.31412	8.33796	8.27232	NM_014265 // NM_021777 // ENST00000265769 // ENST00000437154 // AK303437 // ENST00000397649 // ENST00000520448 // ENST00000520665 // ENST00000523379 // ENST00000523440 // ENST00000518516 // ENST00000523236	ADAM28	ADAM metallopeptidase domain 28	10863
16769770	0.118008	0.892815	0.150828	0.855476	-0.395742	0.103599	-0.362922	0.197017	-1.20771	2.2112e-06	-1.45436	1.80017e-06	-0.117874	0.788381	-0.36452	0.0873944	0.0382846	0.952696	0.316153	0.485981		10.614	10.6073	10.5994	10.6285	10.7292	10.6797	10.5682	10.5859	10.4505	9.52161	9.49933	9.53289	10.776	10.8264	10.7809	10.7933	10.7958	10.8019	10.8269	10.6665	10.7232	10.4812	10.448	10.4104	NM_018360 // NM_001168683 // ENST00000380122 // ENST00000398155 // AY739713 // ENST00000485153	TXLNG // CXorf15	taxilin gamma	55787
16764114	0.149539	0.685836	-0.0554161	0.897857	0.0911407	0.512056	-0.113815	0.518446	-1.20399	1.97468e-10	-0.346145	0.00999182	0.201777	0.138347	1.05962	1.17082e-09	-0.00942928	0.978444	0.101207	0.757009		5.9615	5.98662	6.03463	6.08558	6.06416	5.9438	5.59892	5.76204	5.66699	7.86633	8.54345	8.5753	5.89739	5.87165	5.89581	5.66513	5.90469	5.90048	5.88743	6.12867	6.08578	5.72192	6.10063	5.98638	NM_006566 // ENST00000280200 // U56102	CD226	CD226 molecule	10666
16774235	0.0383034	0.92449	0.00283848	0.996092	0.380087	0.000446056	0.344622	0.00137694	-1.20272	2.92952e-11	0.0290518	0.936661	0.00633075	0.982057	1.2381	1.49232e-11	0.216706	0.0472725	-0.157051	0.376906		4.84535	5.25476	5.2776	5.56964	5.29271	5.31652	5.02003	4.89791	4.96493	8.11922	8.11646	7.88823	5.33329	5.46083	5.42229	5.32409	5.7397	5.39396	5.4692	5.81143	5.15399	8.67938	9.23136	8.99099	NM_005025 // NM_001122752 // ENST00000295777 // ENST00000446050 // AK290082 // ENST00000472747 // ENST00000472941 // ENST00000488374 // ENST00000494666	SERPINI1	serpin peptidase inhibitor, clade I (neuroserpin), member 1	5274
16990985	-0.00822492	0.991728	-0.0936721	0.872313	0.0251085	0.922359	-0.0603387	0.865354	-1.20037	2.2112e-08	-0.376538	0.0594721	0.00592954	0.991044	0.829765	3.40876e-06	-0.0445655	0.915756	-0.0637445	0.927564		4.20299	4.29248	4.26233	4.08296	4.34593	4.46204	4.35759	3.99821	4.2345	4.25735	4.35609	4.39107	4.39493	4.4954	4.43448	4.41385	4.09236	4.39965	7.08529	6.88734	6.81153	7.29184	8.1252	7.22012
16788023	0.19273	0.85382	-0.0955657	0.936237	0.00175911	0.997426	-0.286537	0.508608	-1.19989	3.8028e-05	0.298243	0.621076	0.539954	0.0985016	2.03808	4.22928e-08	0.0529288	0.948089	0.591123	0.153271		7.41339	7.52803	7.4314	7.48782	7.53159	7.47698	7.40623	7.05505	7.20165	8.13816	8.15161	7.94533	6.97804	6.93648	7.02767	7.16811	7.00908	7.1078	6.04911	6.36191	6.35654	6.38259	6.42616	6.33959
17102819	0.147393	0.905194	-0.236583	0.829827	-0.155689	0.712528	-0.539665	0.158524	-1.19843	0.000131098	0.532011	0.274519	-5.01898	9.72681e-13	-3.28854	2.00758e-10	4.90774	1.06675e-12	0.044444	0.981595		6.94779	6.76315	6.79509	6.94403	7.02919	6.74138	8.44607	8.27469	8.27939	8.11732	7.80389	7.82883	6.34517	6.03378	6.36202	6.41221	6.27765	6.44002	6.11015	5.96804	6.20391	5.91141	6.13581	6.21538	NM_003255 // ENST00000262768 // BC071586 // ENST00000483343	TIMP2	TIMP metallopeptidase inhibitor 2	7077
16902690	0.253896	0.760243	0.194345	0.829087	0.595859	0.0286881	0.536308	0.0657678	-1.19432	1.34982e-05	-0.739942	0.0152294	0.103821	0.848386	0.558195	0.0189598	0.601624	0.0311356	0.109586	0.921655		10.601	10.5964	10.4564	10.6742	10.5828	10.5429	10.5868	10.5337	10.5006	8.988	9.02659	8.87787	10.8381	10.7468	10.7082	10.9631	10.653	10.7059	10.6147	10.6125	10.5533	10.124	9.87258	9.87248	NM_030636 // ENST00000242108 // BC065518 // ENST00000487069 // ENST00000468591	EEPD1	endonuclease/exonuclease/phosphatase family domain containing 1	80820
16657221	-0.254158	0.752458	-0.0291522	0.982152	-0.11247	0.740445	0.112536	0.829995	-1.19297	9.31884e-06	-0.21717	0.720006	0.0341428	0.958081	1.00994	7.35487e-05	-0.324477	0.348481	-0.177864	0.834317		9.53306	9.379	9.6284	9.82051	9.77861	9.71647	9.72726	9.5374	9.52548	8.84698	8.77588	8.70969	9.92979	9.71884	9.78038	9.95237	9.79254	9.82624	10.1743	10.138	10.0465	10.3722	10.2791	10.1913	NM_020733 // ENST00000311127 // ENST00000451796 // ENST00000482699 // ENST00000488654	HEG1	HEG homolog 1 (zebrafish)	57493
16669796	-0.22054	0.828145	-0.205159	0.843798	0.368847	0.254402	0.384228	0.327376	-1.19069	5.22827e-05	-1.28906	0.000188369	0.104604	0.866918	0.00622959	0.989095	0.0512464	0.951343	-0.212997	0.826416		9.55745	9.37284	9.54428	9.64003	9.57046	9.642	9.36757	9.2915	9.48581	10.9387	10.951	10.9923	9.62502	9.67499	9.74168	9.35846	9.60982	9.69089	9.47566	9.34845	9.46393	9.20142	9.41681	9.45626	NM_033540 // ENST00000471841 // ENST00000263969 // AB043589 // BC040557 // AB043588 // AF329637 // ENST00000357390 // ENST00000280653 // U95822 // ENST00000467174 // ENST00000482661 // ENST00000480636 // ENST00000474903	MFN1	mitofusin 1	55669
16663446	-0.185857	0.962918	-0.361241	0.921605	-1.12835	0.270893	-1.30373	0.27619	-1.19066	0.167967	0.185867	0.960125	-0.673426	0.665983	0.7031	0.471739	-0.961615	0.498293	-0.506697	0.885323		9.66962	9.57857	9.60566	9.79105	9.73506	9.69688	9.86549	9.84481	9.90169	10.2568	10.1018	10.1078	9.48637	9.54718	9.57223	9.45527	9.3692	9.59726	9.17846	9.32657	9.26832	8.96008	8.98417	8.89061	NM_003498 // ENST00000329565 // AF070673	SNN	stannin	8303
16656823	-0.128373	0.954648	-0.238549	0.899869	0.2448	0.718603	0.134624	0.911799	-1.18886	0.0101821	-0.38357	0.770021	0.345261	0.699412	1.15055	0.013848	0.114315	0.934655	0.214776	0.921822		7.61769	7.56234	7.34564	7.4624	7.23015	7.65249	7.73173	7.25657	7.35793	6.99237	7.07921	7.00352	8.58529	8.75678	8.57575	8.5925	8.80463	8.87484	9.45318	9.54468	9.21704	9.46031	9.30875	9.62457	NM_182915 // NM_018234 // NM_001008410 // ENST00000393110 // ENST00000393106 // ENST00000393108 // ENST00000393107 // ENST00000425223 // AF423424 // ENST00000409811 // ENST00000354888 // ENST00000450943	STEAP3	STEAP family member 3	55240
16660753	0.359692	0.460031	-0.084018	0.872313	0.0245552	0.916215	-0.419155	0.006566	-1.18737	5.80036e-09	-0.394564	0.0207353	-0.372997	0.014777	0.419807	0.00194889	0.276402	0.0930547	-0.121151	0.778482		7.83082	7.88308	7.75684	7.97841	7.89593	7.84419	6.59402	6.61947	6.50729	6.52072	7.01625	6.74211	8.28647	8.10735	8.17482	8.39237	8.05124	8.26991	8.85614	8.68509	8.67284	8.69493	8.54517	8.40997	NM_012335 // ENST00000446661 // ENST00000338257 // BC028071 // ENST00000305795	MYO1F	myosin IF	4542
16997010	0.0916798	0.886944	-0.265579	0.656149	-0.0247759	0.927557	-0.382035	0.0404948	-1.18039	6.01073e-08	-0.314883	0.191214	0.0209836	0.962614	0.886486	3.00152e-06	-0.15782	0.573839	-0.11206	0.849779		10.9576	10.9246	10.765	10.9345	10.9106	10.844	11.0098	11.1454	11.0036	11.94	11.9319	11.9453	10.8068	10.681	10.7031	10.7368	10.7009	10.6653	10.664	10.6929	10.6614	10.8444	10.6479	10.7409	NM_178313 // NM_003128 // ENST00000333896 // ENST00000356805 // AF327441 // ENST00000389980 // ENST00000496323	SPTBN1	spectrin, beta, non-erythrocytic 1	6711
16959320	0.176073	0.774433	-0.159991	0.801249	0.102378	0.677545	-0.233686	0.372203	-1.18014	2.60705e-07	-0.141871	0.77061	-1.39217	8.28613e-08	-0.353905	0.0419155	1.22961	5.27833e-07	-0.264945	0.477334		7.53666	7.4615	7.39149	7.52817	7.40703	7.69765	5.90927	5.6692	5.76808	7.25918	7.31512	7.10119	7.09571	6.9419	7.00441	6.97146	6.89575	6.80742	6.63986	6.66415	6.49141	7.4494	7.50355	7.44523	NM_004956 // NM_001163147 // NM_001163148 // NM_001163149 // NM_001163150 // NM_001163151 // NM_001163152 // ENST00000430479 // ENST00000242066 // ENST00000403685 // ENST00000343495 // BC098403 // BC106762 // BC106763 // U17163 // AK294755 // AK294572 // AK293802 // AK299693 // AK316007 // ENST00000443137 // ENST00000420159 // ENST00000405218 // ENST00000399357 // X87175 // ENST00000399359 // ENS…	ETV1	ets variant 1	2115
17002471	0.112911	0.841657	0.0260512	0.974237	0.197144	0.266077	0.110284	0.698652	-1.17983	2.40449e-08	-0.425815	0.0236536	0.626129	0.00026595	1.38014	2.50577e-09	-0.0518127	0.896148	0.377172	0.0787477		9.82659	9.75992	9.91757	9.91562	9.89698	9.90861	9.78476	9.69373	9.82748	11.1138	11.016	11.0873	10.1486	10.0206	10.2685	10.1096	10.2021	10.3026	10.1636	10.0995	10.207	10.1865	10.2669	10.2863	NM_033389 // ENST00000269033 // AK296413 // ENST00000394848 // ENST00000324677	SSH2	slingshot homolog 2 (Drosophila)	85464
16656835	-0.413145	0.851149	-0.680082	0.728574	0.472534	0.515706	0.205597	0.880649	-1.17945	0.030861	0.191254	0.929281	-0.0909931	0.952378	1.27971	0.0204297	0.178862	0.907875	-0.384665	0.858095		10.9356	11.0133	11.0288	10.9785	10.9374	11.0047	11.1393	11.2849	11.1973	12.0249	11.9755	11.9171	11.1775	11.0961	11.1981	11.1658	11.2024	11.2304	11.0789	11.119	11.1673	10.9537	10.9279	11.0004	NM_145799 // NM_015129 // NM_145800 // NM_145802 // ENST00000394610 // ENST00000343984 // ENST00000360156 // ENST00000394616 // ENST00000489216 // ENST00000354228 // AY034177 // ENST00000394612 // ENST00000354416 // ENST00000371492 // ENST00000394617 // ENST00000520510 // ENST00000460411 // ENST00000467310 // ENST00000481072	SEPT6	septin 6	23157
16658231	0.13631	0.791149	-0.125374	0.809285	0.0659245	0.753869	-0.195759	0.359187	-1.17927	1.73195e-08	-0.224439	0.396115	-0.3919	0.0172664	0.562927	0.000221234	0.342162	0.0422356	-0.115663	0.818134		3.9694	3.8592	4.10867	4.15764	4.11479	4.01707	3.81049	4.1853	4.0714	6.41618	6.82776	6.89311	3.78408	4.15425	3.73497	3.78418	3.68629	4.19963	3.8241	4.02217	3.90081	4.12049	4.04959	4.12603
16832588	0.070728	0.897986	0.0345868	0.958287	-0.135103	0.412633	-0.171244	0.38727	-1.17482	4.8763e-09	-0.373029	0.026921	-0.391716	0.00833049	0.410073	0.00195649	0.258715	0.113128	0.00210187	0.997846		8.17279	8.09633	8.13492	8.27764	8.29819	8.29411	8.77254	8.72709	8.85591	7.37403	6.89945	7.24382	8.76919	8.65849	8.69985	8.75196	8.67666	8.77593	8.77746	8.655	8.61867	8.15902	8.10974	8.18856	NM_001145374 // NM_001001655 // NM_001145375 // NR_026931 // NR_026930 // ENST00000429722 // ENST00000343075 // ENST00000435370 // BC070489 // ENST00000440112	ALKBH2	alkB, alkylation repair homolog 2 (E. coli)	121642
16840018	0.0507081	0.916324	-0.0383849	0.94227	0.085903	0.571284	-0.00318995	0.993039	-1.16928	7.03733e-10	-0.136118	0.585273	-0.126711	0.486662	0.906455	2.61053e-08	0.103126	0.630193	-0.109487	0.749504		6.14885	6.24604	6.14904	6.51051	6.03412	6.02689	8.79127	8.88209	8.9965	7.77752	7.82085	7.37847	9.21423	9.34412	9.36055	9.18306	9.24229	9.41791	6.22832	6.95052	6.66757	6.64801	6.65456	6.77999
16838103	0.0259698	0.979845	-0.241691	0.725533	-0.043793	0.891481	-0.311454	0.239094	-1.16909	1.03474e-06	-0.244523	0.548687	-0.0838916	0.845996	0.840676	6.67517e-05	-0.0745477	0.882851	-0.114646	0.885595		6.93143	7.01338	7.0808	6.98982	7.06751	7.12748	7.14417	7.20424	7.18457	7.27007	7.35833	7.36021	8.15059	8.2042	8.31097	8.11507	8.19562	8.15289	8.41656	8.52853	8.31114	8.51591	8.49793	8.49677	NM_080669 // ENST00000440501 // BC010691 // ENST00000262401 // ENST00000321666	SLC46A1	solute carrier family 46 (folate transporter), member 1	113235
16822084	0.119293	0.868432	-0.0229092	0.980906	0.0301928	0.92017	-0.11201	0.753785	-1.16609	3.03276e-07	0.020295	0.981523	0.308014	0.177849	1.4944	9.68684e-09	-0.360005	0.0935591	-0.0821837	0.91678		10.0848	10.0919	9.95442	10.0927	10.0254	10.0054	10.2354	10.2241	10.2689	8.92949	8.86016	8.88349	9.8766	10.1178	9.97162	9.8411	9.88077	9.942	9.75339	9.98739	9.91955	9.55764	9.73437	9.70553	NM_004053 // ENST00000230340 // BC050645 // ENST00000372996 // ENST00000489290 // ENST00000494032 // ENST00000475702	BYSL	bystin-like	705
16669288	0.0532614	0.904331	-0.0481146	0.914108	0.0556469	0.710962	-0.0457291	0.850945	-1.1653	2.36517e-10	-0.226069	0.139913	-0.0223463	0.937422	0.916881	6.95674e-09	-0.0339579	0.906311	-0.111951	0.704058		6.46036	6.501	6.61016	6.74245	6.62322	6.37284	2.42392	2.47393	3.01103	2.93963	3.17675	2.90809	5.55413	4.89583	5.20416	5.26891	4.61939	4.73975	4.2455	4.44479	3.85918	4.14473	3.88833	3.80646
17002922	0.144016	0.839737	-0.0926137	0.901865	-0.670378	0.0016516	-0.907008	7.26738e-05	-1.16462	7.26093e-07	0.0500505	0.948023	-1.30745	5.02851e-07	-0.0927726	0.694195	0.168482	0.632295	-0.468588	0.0886261		3.97632	4.04931	4.06456	3.89007	3.87331	3.90527	3.83813	4.18302	4.08497	6.54402	7.23369	7.21985	3.88442	3.76843	3.93954	3.91355	3.7443	3.95527	3.83628	4.09135	4.10732	4.31803	4.74965	4.92733	NM_002262 // NM_007334 // NM_001114396 // ENST00000336164 // ENST00000350274 // BC028009 // ENST00000381908 // ENST00000381907 // ENST00000344825	KLRD1	killer cell lectin-like receptor subfamily D, member 1	3824
16823512	0.14244	0.732178	0.0132992	0.98537	0.189881	0.192345	0.0607399	0.826079	-1.1646	2.46071e-09	-0.330522	0.0411229	-0.0517579	0.853584	0.78232	6.32147e-07	0.264199	0.0772449	0.02256	0.975826		6.87412	6.97468	7.03748	7.19858	7.02035	7.09182	7.44757	7.35596	7.10835	8.78818	9.01403	8.96134	7.69215	7.78105	7.79092	7.71336	7.60429	7.79006	7.68573	7.58187	7.53756	8.11417	7.97345	8.08718	NM_005811 // ENST00000257868 // AF028333	GDF11	growth differentiation factor 11	10220
17124426	-0.00130304	0.999607	-0.505106	0.686291	0.721386	0.0702722	0.217583	0.761544	-1.16339	0.000974216	-1.37972	0.0016286	1.76244	3.58793e-05	1.54612	5.58017e-05	-1.16966	0.00304162	-0.128606	0.938422		8.98817	8.89689	8.93495	8.9074	8.93289	8.90098	8.96685	9.00607	8.98789	7.9796	7.92151	7.9261	8.58315	8.6855	8.67602	8.42837	8.59134	8.51595	8.51098	8.61802	8.5084	8.22778	8.35024	8.2805	NM_001142928 // NM_023942 // ENST00000359623 // ENST00000323078 // ENST00000493307 // AK093915 // ENST00000463441 // ENST00000471872	LRRC61	leucine rich repeat containing 61	65999
16654327	-0.0678378	0.94814	-0.0314437	0.980217	0.0476403	0.900223	0.0840344	0.878343	-1.15824	8.44578e-06	0.0718503	0.935242	0.293233	0.383856	1.52332	2.51087e-07	-0.464841	0.0920859	-0.219248	0.744162		7.18368	6.92664	7.00255	7.13035	7.08176	7.18361	6.91934	6.90363	7.13823	8.44443	8.35408	8.42791	7.22159	7.22768	7.32124	7.072	7.13368	7.23464	7.19768	7.12502	7.17296	7.21308	7.06753	7.04474	NM_001126049 // ENST00000445946 // EU552092	KILLIN	killin protein	100144748
16868130	0.0415554	0.943079	-0.0660653	0.897712	0.0514002	0.786964	-0.0562204	0.848923	-1.1577	3.9726e-09	-0.171685	0.506756	0.149852	0.453251	1.13587	5.26423e-09	-0.141843	0.509433	-0.0433907	0.943732		7.67851	7.57391	7.54046	7.82805	7.68025	7.74659	7.91404	7.7162	7.98449	9.28853	9.22659	9.09967	7.83007	7.837	7.94697	7.88667	7.89129	7.92009	7.98666	8.05399	7.93707	8.15194	8.24092	8.17657	NM_003775 // ENST00000246115 // BC014970	S1PR4	sphingosine-1-phosphate receptor 4	8698
16722799	0.0576296	0.92482	-0.0661215	0.909913	-0.0130199	0.960228	-0.136771	0.568775	-1.15768	1.54862e-08	-0.259029	0.255334	-0.247851	0.174602	0.650799	3.22956e-05	0.0505053	0.892817	-0.184326	0.578297		8.93684	9.14342	8.84272	8.99972	9.01444	8.84262	8.42626	8.76533	8.45198	10.6335	10.8166	10.5778	8.78661	8.87448	8.59842	8.64801	8.80265	8.62916	8.96679	8.93361	8.69151	9.64052	9.59443	9.34414	NM_006526 // ENST00000302342 // ENST00000371471 // AF041259 // ENST00000395971 // ENST00000431687 // ENST00000487458	ZNF217	zinc finger protein 217	7764
16689546	-0.0441624	0.953122	-0.05239	0.94282	-0.0283438	0.917121	-0.0365714	0.928354	-1.1572	8.18994e-08	-0.791709	0.000105338	-2.35829	6.91207e-12	-1.9928	3.31362e-11	1.8443	3.38694e-10	-0.485647	0.0219544		9.27269	8.98392	9.08435	9.45745	9.01859	9.18244	11.0163	11.0643	11.0767	10.3288	10.0812	10.2865	9.92795	9.74087	9.87886	9.64529	9.69197	9.78005	10.5166	10.4652	10.4371	10.7312	10.5573	10.6157	NM_002615 // ENST00000254722 // M76979	SERPINF1	serpin peptidase inhibitor, clade F (alpha-2 antiplasmin, pigment epithelium derived factor), member 1	5176
16829801	-0.0167564	0.981964	0.0537633	0.931086	0.153358	0.368467	0.223878	0.233184	-1.15605	1.18959e-08	-0.301082	0.130757	0.339898	0.0338661	1.19486	7.56547e-09	0.0801935	0.802128	0.266733	0.264723		8.61432	8.61059	8.55207	8.67334	8.69072	8.7308	7.50532	7.73086	7.51335	8.07837	8.03675	7.90451	9.11793	9.14707	8.98789	9.04468	9.04498	8.99393	9.1373	9.17192	8.9307	8.76114	8.86913	8.69306	NM_183234 // NM_004580 // NM_183235 // NM_183236 // ENST00000396307 // ENST00000336787 // ENST00000423492 // U38654 // ENST00000396304	RAB27A	RAB27A, member RAS oncogene family	5873
16878731	0.0564925	0.961159	-0.000504401	0.999534	1.04003	0.000291933	0.983033	0.000627156	-1.15311	2.43857e-05	-0.055847	0.958519	0.106935	0.845807	1.2042	1.63012e-05	0.440586	0.165366	-0.49251	0.234631		7.14385	7.00901	7.00342	7.48367	7.01361	7.1061	8.09398	8.36704	8.05131	7.90643	7.94051	7.8791	6.04133	5.96146	6.04821	5.8616	5.89659	6.14171	6.02176	6.10699	6.17379	6.09198	6.00819	6.13703	NM_016941 // NM_203486 // ENST00000205143 // ENST00000356433 // BC000218	DLL3	delta-like 3 (Drosophila)	10683
16654541	-0.113574	0.926108	-0.0736811	0.95834	-0.271302	0.449327	-0.231409	0.658819	-1.15201	0.000122141	-0.164822	0.861241	-0.132926	0.830694	0.854261	0.00253917	-0.189225	0.758265	-0.0508489	0.976322		5.12926	4.97282	4.8552	5.18548	5.0182	5.19182	4.7048	4.92438	5.03743	7.39745	7.30051	7.27183	5.34388	5.16487	5.69182	5.22926	5.33167	5.32196	6.02798	5.72362	5.57184	7.7121	8.03505	7.78811	XR_109952	LOC100507307	hypothetical LOC100507307	100507307
16656587	-0.332508	0.770298	0.0584433	0.973559	-0.337747	0.410345	0.0532039	0.950867	-1.15071	0.000567071	-0.107108	0.933457	-0.0521866	0.953533	0.991414	0.00250787	-0.316331	0.592869	-0.0307704	0.990925		5.02232	4.71559	5.15847	4.7427	5.21242	4.9212	4.83914	4.77973	4.76726	4.64543	4.59461	4.8372	6.8596	6.84852	7.08641	6.77658	6.8832	7.12032	7.1858	6.81325	7.0657	7.03714	7.38915	7.4506
17083091	0.53616	0.783863	-0.40574	0.850407	-0.172632	0.84221	-1.11453	0.106883	-1.14964	0.0337525	-0.0541073	0.985375	-0.0348224	0.983607	1.06071	0.0549045	-0.126572	0.939389	0.0112376	0.997809		3.69728	3.29132	2.78429	3.59332	3.70408	3.58479	3.55533	3.63309	3.46939	3.78016	3.85104	3.75028	4.51027	4.26169	4.45259	4.12868	4.17047	4.03104	5.50068	5.52379	5.55096	6.28252	6.40857	6.56686
16656655	0.286463	0.875807	-0.41236	0.802271	0.522201	0.352499	-0.176622	0.87226	-1.1495	0.00980342	-0.0450485	0.985258	-0.138865	0.902439	0.965587	0.0318734	0.435261	0.599291	-0.225805	0.911364		5.73137	5.76743	5.45305	5.20171	5.51779	5.44385	5.47731	5.47099	5.75582	5.1791	5.18302	5.20479	6.56073	6.13547	6.68449	6.37695	6.37576	6.30701	7.43243	7.16117	7.38513	7.48413	7.69427	7.43525	NM_033058 // NM_184085 // NM_184086 // NM_184087 // ENST00000315962 // ENST00000276573 // ENST00000353317 // ENST00000350034 // BC007750 // BT007212 // AK091310 // ENST00000448699 // ENST00000396635 // ENST00000517647	TRIM55	tripartite motif-containing 55	84675
17118834	-0.1327	0.859345	-0.0324638	0.974684	-0.146567	0.55253	-0.0463308	0.923282	-1.1492	8.54085e-07	-0.29536	0.382983	-0.283894	0.277563	0.569951	0.00239847	0.0792147	0.868284	-0.0581117	0.948699		3.99976	4.03139	4.20696	4.08338	3.8399	3.86394	4.06446	4.08787	4.11597	6.79956	7.24412	7.33442	3.59836	4.25599	3.60761	3.98698	3.85917	3.68558	3.93127	3.63849	3.87797	4.27913	4.1588	3.78781	NM_031281 // NM_001195388 // ENST00000361835 // AF343664 // AF369794 // BC101066 // BC101067 // BC101069 // AF397453 // AF343663 // AF343662 // ENST00000356953 // AK090423 // AK090475 // ENST00000368189 // ENST00000368190 // ENST00000368191 // AL832301 // ENST00000461387 // ENST00000497286 // ENST00000477122 // ENST00000462218 // ENST00000483875 // ENST00000481082	FCRL5	Fc receptor-like 5	83416
16780271	0.0973289	0.796232	-0.0366785	0.939121	0.239381	0.0434091	0.105373	0.550114	-1.14807	2.72556e-10	-0.352484	0.00687466	-0.0685801	0.734871	0.727008	1.68393e-07	0.310033	0.00869169	0.00207223	0.997809		9.83221	9.72365	9.63398	9.79719	9.75441	9.75097	9.43939	9.39835	9.31658	10.7138	10.6604	10.7422	9.85883	9.84197	9.75649	9.91438	9.85646	9.71499	9.32963	9.32195	9.02367	9.31481	9.26943	9.15775	NM_206943 // NM_000627 // NM_001166265 // NM_001166264 // NM_001166266 // ENST00000404816 // ENST00000354476 // ENST00000390003 // ENST00000407925 // ENST00000418533 // BC130289 // ENST00000272273 // ENST00000498013 // ENST00000489740	LTBP1	latent transforming growth factor beta binding protein 1	4052
16891488	0.115219	0.926246	-0.0991826	0.940058	-0.17314	0.666259	-0.387541	0.363356	-1.1459	0.000156751	-0.207017	0.811423	-0.256326	0.610109	0.682555	0.0160115	-0.0204252	0.982744	-0.103611	0.940256		5.60074	5.52889	5.59404	5.32917	5.74892	5.86374	5.67872	5.47824	5.47916	8.56635	9.26674	9.48409	5.65034	4.87863	5.17514	5.65788	5.66642	5.64958	5.22659	5.48248	5.60622	5.54734	5.48139	5.54837
16915712	0.0973684	0.76501	0.0814834	0.810278	0.0974903	0.407446	0.0816052	0.630984	-1.14371	6.27553e-11	-0.390478	0.000923394	-0.103656	0.490459	0.649574	1.80234e-07	-0.0791003	0.663595	-0.280247	0.0275554		10.1597	9.96366	10.1325	10.182	10.3166	10.1006	9.08028	9.58409	9.63127	7.26927	7.43206	7.33902	9.88045	9.75692	9.90327	9.82971	9.90127	10.0064	9.61168	9.80873	9.72285	7.46555	7.64904	7.59307
16935775	0.038918	0.916605	0.0220727	0.959513	0.158152	0.1171	0.141307	0.239094	-1.1429	2.60236e-11	-0.155681	0.286418	-0.0639245	0.699179	0.923292	4.51615e-10	0.132504	0.283118	-0.0895726	0.723105		7.92703	7.86951	7.84848	7.94913	7.93373	7.89286	7.98275	7.86383	7.96741	6.8059	6.59138	6.6164	7.81937	7.76197	7.69923	7.74033	7.67134	7.84915	7.88863	7.76962	7.79641	7.65779	7.49636	7.53171	NM_001166686 // NM_001166688 // NM_000289 // NM_001166687 // ENST00000340802 // ENST00000359794 // AK126020 // ENST00000395233 // ENST00000312352	PFKM	phosphofructokinase, muscle	5213
16875821	0.0501713	0.953122	0.049912	0.954314	0.00357555	0.991241	0.00331625	0.9952	-1.1426	5.56303e-07	-0.0422476	0.956464	-0.0484671	0.915539	1.05189	1.78553e-06	0.0827008	0.85524	0.0306582	0.978662		8.52025	8.51696	8.55025	8.5365	8.53478	8.56129	8.45547	8.60715	8.57152	9.52244	9.66501	9.54336	8.54324	8.62789	8.6017	8.54738	8.58106	8.58049	8.50651	8.59829	8.59187	8.64	8.70484	8.58471	NM_003899 // NM_001113511 // NM_145735 // NM_001113513 // NM_001113512 // ENST00000375736 // ENST00000375741 // ENST00000426073 // ENST00000317133 // ENST00000375739 // BC060776 // AK300272 // BC033905 // AK300157 // AK295472 // AB177848 // ENST00000370623 // ENST00000375737 // ENST00000466143 // ENST00000397116 // ENST00000469877 // ENST00000491775 // ENST00000449979 // ENST00000467053 // AK0950…	ARHGEF7	Rho guanine nucleotide exchange factor (GEF) 7	8874
16822516	0.209004	0.625706	0.0753954	0.863269	-0.0520911	0.753105	-0.1857	0.228556	-1.14138	9.48427e-10	-0.333896	0.0203964	-0.0846319	0.690975	0.722857	5.6442e-07	0.214119	0.135627	0.181578	0.420993		7.96175	7.80061	7.77043	8.10917	7.97572	8.06826	8.05844	8.16681	8.1203	6.62135	6.72988	6.72939	7.60442	7.46325	7.35241	7.5366	7.3253	7.43007	7.15676	7.29259	7.22911	6.8318	6.97215	6.83163	NM_007283 // NM_001003794 // ENST00000434178 // ENST00000398104 // ENST00000265052 // AK091314 // ENST00000453507 // ENST00000494830 // ENST00000479967 // ENST00000465597 // ENST00000476682 // ENST00000476654	MGLL	monoglyceride lipase	11343
16907458	-0.0148155	0.973047	0.0428078	0.90234	-0.160128	0.107655	-0.102504	0.450238	-1.13984	2.22072e-11	-0.145176	0.332479	-0.0293293	0.888133	0.965338	1.97221e-10	-0.101193	0.474823	0.0296049	0.943226		10.1646	10.1349	10.129	10.2989	10.1286	10.1349	10.1605	10.1956	10.1715	9.42323	9.21927	9.31477	10.2246	10.1274	10.147	10.223	10.1379	10.1406	10.6277	10.5679	10.4614	10.4911	10.4645	10.4428	NM_001130958 // NM_001040442 // NM_001445 // ENST00000393980 // ENST00000310650 // ENST00000402432 // ENST00000393982 // DQ132786 // ENST00000523955 // ENST00000521362	FABP6	fatty acid binding protein 6, ileal	2172
16656581	-0.257441	0.874797	-0.156944	0.929429	-0.0243534	0.974339	0.0761435	0.942546	-1.13895	0.00370833	-0.079555	0.963835	-0.023512	0.984688	1.03588	0.00850513	-0.228581	0.805939	-0.22774	0.889545		7.23865	7.10475	7.25159	7.40833	7.41582	7.46125	7.26554	7.22771	7.39547	6.01293	5.86891	6.10419	7.26586	7.06319	7.1767	7.14915	7.20486	7.07397	7.56775	7.44406	7.48194	7.29704	7.29246	7.429	NM_001882 // ENST00000274368 // BC018038 // ENST00000512446 // ENST00000514258 // ENST00000503763	CRHBP	corticotropin releasing hormone binding protein	1393
16991760	0.272444	0.80244	-0.00164118	0.999061	-0.0954965	0.839946	-0.369582	0.431433	-1.13868	0.000295002	-0.701702	0.0978198	-0.177711	0.772599	0.25927	0.453423	-0.0794163	0.927967	-0.16163	0.901522		9.59195	9.40389	9.48944	9.53321	9.44208	9.55163	9.26818	9.24843	9.36971	7.87923	7.88294	8.0783	9.29751	9.40511	9.3854	9.30839	9.21686	9.4542	9.31417	9.30972	9.40733	9.0575	9.13423	9.0409	NM_001142961 // NM_020400 // ENST00000431922 // ENST00000329858 // BC072394 // ENST00000435659	LPAR5	lysophosphatidic acid receptor 5	57121
16767009	0.153647	0.685868	-0.00702133	0.992712	0.474876	0.000320516	0.314207	0.0158157	-1.13849	9.03044e-10	-0.104985	0.718422	0.0869957	0.676708	1.1205	1.09793e-09	0.260963	0.0494854	-0.126916	0.676904		6.46586	6.44386	6.33066	6.51248	6.2399	6.36384	6.55225	6.11192	6.25825	8.53494	8.65835	8.31066	6.5086	6.69547	6.58824	6.3413	6.7499	6.70776	6.48789	6.49297	6.38208	7.40453	7.24733	7.24699
16799739	0.377803	0.729795	-0.005523	0.997537	1.24179	0.000899598	0.858467	0.0232136	-1.13496	0.000612353	0.139632	0.908879	0.609127	0.140445	1.88372	2.02054e-06	0.69371	0.0769492	0.0610442	0.974789		10.1193	10.1522	10.0506	10.1963	10.2356	10.1395	10.159	10.286	10.1429	10.1903	10.2307	10.1165	9.02251	8.82668	8.79611	8.7871	8.90078	8.86145	10.1418	10.2109	10.1341	10.2545	10.3234	10.2012	NM_001031835 // NM_000293 // ENST00000299167 // ENST00000323584 // BC033657 // ENST00000455779 // ENST00000427582	PHKB	phosphorylase kinase, beta	5257
16873632	0.0414097	0.943704	0.0187396	0.979385	0.225877	0.129125	0.203207	0.254426	-1.13421	5.98949e-09	-0.0471611	0.924972	0.148441	0.465007	1.23549	1.76094e-09	0.128777	0.57393	0.0513416	0.933848		6.91575	6.54101	6.81352	6.98219	6.76343	6.83937	6.93875	6.88768	6.82554	8.50789	8.48059	8.54154	7.27077	7.13021	7.14235	7.17249	6.97417	7.10975	7.18541	7.00123	6.93508	7.21324	7.2283	7.26196
16841941	0.105751	0.750066	0.0812159	0.818528	0.132419	0.253602	0.107884	0.49033	-1.13244	1.12596e-10	-0.287135	0.0195844	-0.111162	0.467727	0.734146	5.25079e-08	0.300634	0.00599106	0.0570536	0.886961		8.90371	8.98098	8.8766	9.06132	9.05009	9.10841	8.1842	8.41184	8.22852	9.8076	9.89127	9.74516	8.99059	8.83544	8.69444	8.8135	8.86896	8.76294	9.03003	8.8729	8.71562	9.39068	9.42656	9.31717	NM_134428 // NM_002919 // ENST00000382004 // ENST00000302303 // ENST00000358730 // BC022191 // AK289540 // BC067778 // ENST00000381992 // ENST00000381986 // ENST00000449190 // ENST00000381985 // ENST00000458034 // ENST00000451859 // ENST00000457373 // AK310956	RFX3	regulatory factor X, 3 (influences HLA class II expression)	5991
17118732	-0.0153719	0.990413	0.111069	0.912634	-0.140421	0.676924	-0.0139807	0.983996	-1.13039	2.43902e-05	-0.10072	0.911915	-0.0362173	0.956387	0.993451	0.00011938	-0.201416	0.666332	-0.0972119	0.932527		8.79065	8.61704	8.67264	8.72013	8.84512	8.82298	8.90582	9.08647	9.14549	7.34605	7.41901	7.33575	8.90295	8.73658	8.66053	8.91733	8.76595	8.75562	9.25913	8.90835	8.90735	7.68853	7.64737	7.6881	NM_002318 // BC000594 // ENST00000404624 // ENST00000389131 // ENST00000519243 // ENST00000523833 // ENST00000524168	LOXL2	lysyl oxidase-like 2	4017
16654763	-0.0469725	0.971009	-0.148401	0.881112	0.0556439	0.896227	-0.045785	0.945842	-1.13004	4.97448e-05	-0.17588	0.82225	-0.0357618	0.960172	0.918397	0.000511633	0.19152	0.715871	0.100115	0.934562		10.5678	10.6071	10.4408	10.6867	10.6589	10.5744	10.5181	10.566	10.5827	11.6727	11.5978	11.5479	10.2446	9.91725	10.0241	10.3592	10.199	10.0361	9.65362	9.42966	9.41346	9.97826	9.67545	9.63149	NM_001039966 // NM_001098201 // NM_001505 // ENST00000397092 // ENST00000397088 // ENST00000297469 // ENST00000401670 // AF015257 // ENST00000413368 // ENST00000354575 // ENST00000342452	GPER	G protein-coupled estrogen receptor 1	2852
16915815	-0.020002	0.972591	0.0162923	0.980011	-0.143222	0.307699	-0.106928	0.59851	-1.12763	1.45745e-09	-0.0789237	0.8247	-0.160245	0.340071	0.888461	4.26798e-08	-0.177795	0.270032	-0.194817	0.377451		6.24297	6.11994	6.2162	6.25692	6.16703	6.3309	6.54151	6.65258	6.39482	8.48641	8.58742	8.32155	6.70354	6.75032	6.64125	6.62536	6.43745	6.38953	7.43419	7.56838	7.2488	7.27414	7.53436	7.69699	NM_015310 // NM_206909 // ENST00000327040 // ENST00000286485 // AF243495 // ENST00000440756 // ENST00000381690 // ENST00000518315 // ENST00000519653 // ENST00000519633 // ENST00000518963 // ENST00000517971 // ENST00000518303 // ENST00000521878	PSD3	pleckstrin and Sec7 domain containing 3	23362
16848953	0.156157	0.735405	-0.088281	0.869612	0.168791	0.312963	-0.0756468	0.798464	-1.12705	1.70356e-08	-0.243032	0.290658	-0.117116	0.631583	0.766907	3.31309e-06	0.0492951	0.893321	-0.236612	0.359452		7.59984	7.91057	7.72338	7.82878	8.00964	8.06991	6.31911	6.43567	6.47957	7.87288	7.89522	7.68615	8.78613	9.06939	8.90319	8.61933	8.86493	8.87301	8.19029	8.41332	8.35942	7.71044	7.76936	7.76171	NM_021181 // ENST00000368043 // AB027233 // BC027867 // AY358512 // AF390894 // AF291815 // AK301432 // AK292148 // AK292097 // AK290706 // AK298499 // AK301438 // AK301137 // AK298548 // ENST00000368042 // ENST00000435517 // ENST00000359331 // ENST00000441662 // ENST00000458602 // AJ271869 // ENST00000444090 // ENST00000458104 // ENST00000484221 // ENST00000466792 // ENST00000488819 // ENST00000…	SLAMF7	SLAM family member 7	57823
16891107	0.110102	0.859848	0.0567057	0.935666	-0.0855989	0.698165	-0.138995	0.616381	-1.12641	9.22554e-08	-0.34881	0.11559	-0.326935	0.0841686	0.450665	0.00365549	0.202731	0.39425	-0.0386044	0.963651		8.75129	8.83576	8.90228	8.89624	8.78316	8.92182	8.5421	8.60222	8.64853	10.2063	10.2795	10.4125	9.11161	8.90593	8.97707	8.64438	8.81025	9.14961	8.74263	8.63258	8.64028	8.56417	8.49329	8.60117
16656585	-0.337354	0.747868	-0.0737178	0.961396	-0.210557	0.614391	0.0530792	0.9475	-1.12545	0.000380552	-0.160086	0.881877	0.0411144	0.96226	1.00648	0.00125493	-0.345124	0.501722	-0.0934531	0.949354		8.63652	8.89779	8.59725	8.62278	8.78091	8.65012	9.094	9.34436	9.08424	10.9152	10.8483	10.9129	10.0176	10.0795	9.92216	9.793	10.0439	9.91661	9.99356	10.0772	9.79224	10.7103	10.7354	10.6553	NM_014247 // ENST00000264431 // BC117321 // ENST00000504604	RAPGEF2	Rap guanine nucleotide exchange factor (GEF) 2	9693
16993235	0.0949886	0.892815	0.104717	0.873324	0.0920105	0.704888	0.101739	0.775374	-1.12078	3.51761e-07	-0.213557	0.554294	-0.189712	0.485492	0.717508	9.70105e-05	0.278247	0.227229	-0.00347578	0.997809		9.75536	9.51596	9.76158	9.66665	9.76168	9.75181	8.64651	8.61838	8.75472	8.41553	8.21629	8.53197	8.33861	8.35018	8.32914	8.24864	8.24383	8.32535	7.34497	7.36663	7.45926	6.98332	6.93434	7.04957	ENST00000390285 // AF267874	IGLV6-57	immunoglobulin lambda variable 6-57	28778
16889879	0.0920961	0.790894	0.0521113	0.891736	0.38329	0.000656611	0.343305	0.00216085	-1.11929	1.40112e-10	-0.208868	0.140952	-0.0529728	0.794165	0.857451	6.00223e-09	0.425665	0.00020022	-0.0105979	0.988569		10.5904	10.6665	10.6174	10.623	10.6936	10.6518	10.3524	10.4234	10.3992	11.0904	11.0296	10.9368	10.0506	10.0859	10.0092	9.96513	10.0122	10.0264	10.0728	10.1606	9.98973	10.0409	10.0153	10.035	NM_001130528 // NM_003971 // ENST00000262013 // ENST00000357122 // AY850123 // BC146755 // BC153878 // AF327452 // AK295098 // AK302789 // AK299553 // AY219897 // AF542172 // BC106048 // BC007524 // BC059946 // ENST00000357804 // ENST00000376407 // ENST00000510283 // ENST00000505279 // X91879 // AK024068 // AY236487 // ENST00000357791 // ENST00000513746 // ENST00000514613 // ENST00000505173 // EN…	SPAG9	sperm associated antigen 9	9043
16991757	0.242699	0.772176	0.153795	0.869612	-0.265432	0.372546	-0.354336	0.30125	-1.1178	2.75123e-05	-0.534025	0.121333	-0.0354254	0.957439	0.548349	0.0205295	-0.0977014	0.873854	0.132306	0.897794		10.1545	10.0754	10.1788	10.4389	10.1469	10.2005	10.2314	10.2778	10.2273	11.5639	11.5843	11.3954	10.1731	10.2003	10.1154	10.0182	10.114	9.96533	10.1997	10.1234	10.1555	10.2692	10.2256	10.1498	NM_031965 // ENST00000325418 // AF289865	GSG2	germ cell associated 2 (haspin)	83903
17004747	-0.0567569	0.937692	-0.0830077	0.899487	-0.167846	0.412008	-0.194097	0.446617	-1.11637	2.03595e-07	-0.208013	0.543494	-0.0872699	0.799146	0.821083	1.20224e-05	-0.110416	0.755129	-0.0298392	0.975561		10.0855	10.0392	9.95406	10.1034	10.1251	10.0189	10.1379	10.0688	10.121	8.92774	8.63179	8.67669	10.0547	10.18	10.0497	10.2231	10.0444	10.1633	10.0589	10.0343	10.0576	9.93382	9.84118	9.74279	NM_002226 // NM_145159 // ENST00000331782 // ENST00000347004 // AF029778	JAG2	jagged 2	3714
16740956	0.0450415	0.945013	-0.121431	0.812021	0.344937	0.0312061	0.178465	0.409588	-1.11456	3.08897e-08	-0.802598	2.45371e-05	0.219297	0.265013	0.531258	0.000339558	0.0374932	0.92732	-0.0881463	0.877481		8.7147	8.90377	8.84971	8.83397	9.10666	9.04821	9.2995	9.63326	9.52189	7.65305	7.77228	7.86089	8.07659	7.75732	7.8576	8.07428	7.88723	7.85298	6.98668	7.01142	7.32069	7.00053	7.23659	6.78972	NM_134444 // ENST00000301295 // AY072792 // ENST00000346986 // ENST00000419009	NLRP4	NLR family, pyrin domain containing 4	147945
16825689	0.123865	0.846099	0.0340789	0.967731	0.437661	0.018418	0.347875	0.0852781	-1.11224	2.52968e-07	-0.823926	0.00010843	0.274649	0.213767	0.562962	0.000854801	0.0130982	0.981136	-0.149914	0.774754		11.4867	11.5319	11.5395	11.559	11.5673	11.557	10.9379	10.9605	10.9462	10.7181	10.7806	10.6724	11.5307	11.5671	11.5213	11.4259	11.4918	11.4826	11.5394	11.5176	11.547	11.5495	11.5263	11.5254	NM_002951 // NM_001135771 // ENST00000237530 // BC020222 // BC003560 // CR456899 // AK296126 // ENST00000338768 // ENST00000373623 // ENST00000373628 // ENST00000397161 // AK123690 // ENST00000462163 // ENST00000373622 // AK308683 // ENST00000373632 // ENST00000456102 // ENST00000456400 // ENST00000437329 // ENST00000470352	RPN2 // EEF1A2	ribophorin II // eukaryotic translation elongation factor 1 alpha 2	6185 // 1917
16741437	-0.0585808	0.928212	0.136117	0.802271	-0.0034706	0.990214	0.191227	0.404431	-1.11126	7.17823e-08	-0.370557	0.0696761	-0.487783	0.00406151	0.252916	0.0968179	0.617535	0.000409336	0.133223	0.786266		7.75088	7.70965	7.62509	7.8209	7.79646	7.80054	6.72983	6.54789	6.77954	6.45363	6.65253	6.26253	7.70954	7.91701	7.86168	7.67638	7.93443	7.92446	8.13105	8.13416	8.01002	8.1013	8.17509	8.06732	NM_002031 // ENST00000368626 // U00803	FRK	fyn-related kinase	2444
16863282	0.0536959	0.91822	-0.0809486	0.866386	-0.0263603	0.898863	-0.161005	0.386788	-1.10949	4.52145e-09	-0.181465	0.438631	-0.152595	0.420042	0.77543	6.77565e-07	0.0524506	0.867988	-0.0737844	0.884506		9.00201	9.03792	9.11684	9.18475	9.07604	9.18808	9.03025	8.85396	9.03526	7.92889	7.81182	7.74763	9.11007	9.13122	9.20795	9.18131	9.24972	9.26265	8.81805	8.87458	8.91587	8.49726	8.45754	8.48227	NM_016354 // ENST00000217159 // ENST00000370507 // AF104334 // ENST00000370512 // ENST00000342674 // ENST00000451793 // ENST00000497209 // ENST00000470412 // ENST00000495889 // ENST00000466961 // ENST00000466818	SLCO4A1	solute carrier organic anion transporter family, member 4A1	28231
16705725	0.195271	0.658237	0.0276763	0.963901	0.316689	0.0209119	0.149094	0.427345	-1.10821	3.76504e-09	-0.285965	0.0908716	-0.0406409	0.890362	0.781603	5.00622e-07	0.334636	0.015797	-0.0226934	0.975076		8.90326	8.90027	8.9177	8.94414	9.01265	8.99605	8.83147	8.84805	8.72089	8.15886	8.14012	8.00498	8.93823	9.10251	9.08786	8.9627	9.16118	9.05829	9.20104	9.28665	9.12996	9.26448	9.2955	9.2565	NM_001031695 // NM_001082576 // NM_001082578 // NM_001082579 // NM_014309 // NM_001082577 // ENST00000438146 // ENST00000405409 // ENST00000449924 // ENST00000416721 // ENST00000414461 // AY072786 // AF229058 // BC013115 // BC025281 // AK291460 // CR456559 // AL009266 // AY960684 // ENST00000441153 // ENST00000405616 // ENST00000404365 // ENST00000338644 // AM419009 // ENST00000262829 // ENST0000…	RBFOX2 // RBM9	RNA binding protein, fox-1 homolog (C. elegans) 2 // RNA binding motif protein 9	23543
17125032	-0.0470185	0.961159	0.0937435	0.914671	0.662409	0.00443837	0.803171	0.000861027	-1.10807	4.94815e-06	-0.0777423	0.922257	0.673706	0.00384549	1.70404	1.56479e-08	0.230015	0.508146	0.241311	0.655113		4.28663	4.87072	4.16875	5.12167	4.87	5.58055	5.61795	5.38423	5.59348	8.12471	7.95644	8.21899	7.76931	8.0845	8.09527	7.64411	7.9629	7.82107	8.12172	8.06567	7.91288	8.3428	8.1918	7.88758	NM_030925 // NM_001079670 // ENST00000347776 // ENST00000355854 // ENST00000410043 // ENST00000409308 // BC010993 // ENST00000378341 // ENST00000457041 // ENST00000413278 // ENST00000409082 // ENST00000476943 // ENST00000470410	CAB39L	calcium binding protein 39-like	81617
16664074	-0.0243892	0.965115	-0.137774	0.734721	-0.0269128	0.888433	-0.140298	0.435972	-1.1075	1.98202e-09	-0.155302	0.509172	-0.0436384	0.871154	0.90856	3.27356e-08	0.0428156	0.8901	0.02609	0.968741		8.30649	8.47935	8.42177	8.127	8.28784	8.36107	6.60159	6.13243	6.29879	6.58544	6.64148	6.50532	7.71698	7.37389	7.64732	7.52394	7.47986	7.39548	7.03102	7.00166	7.01168	6.83482	7.02259	6.7655
16827381	0.0102224	0.988608	-0.0716008	0.891736	-0.216026	0.16659	-0.297849	0.0651281	-1.10243	1.58624e-08	0.0052971	0.994638	-0.939837	4.80267e-07	0.167889	0.235882	0.282199	0.0818417	-0.441612	0.0117647		8.99405	8.89691	9.08726	9.26085	9.02914	8.98277	8.79561	8.90262	8.81618	10.923	10.7637	10.8874	8.97355	9.39537	9.16662	8.77953	9.13304	9.04852	8.88041	9.03332	8.69427	9.63724	9.64753	9.5162	NM_024007 // ENST00000313708 // BC038805 // ENST00000380654 // ENST00000518836 // ENST00000519890 // ENST00000519739 // ENST00000522192 // ENST00000523464	EBF1	early B-cell factor 1	1879
16842206	0.101249	0.865239	0.00709909	0.994361	-0.304814	0.0670369	-0.398964	0.0182187	-1.10027	5.46182e-08	-0.405821	0.0311422	-0.899669	2.86888e-06	-0.205223	0.175937	0.240829	0.220498	-0.354025	0.103644		12.0384	12.0237	12.1532	12.1233	12.0395	12.1718	12.3033	12.2762	12.4003	9.34088	9.53911	9.75882	11.2341	11.4772	11.5498	11.4677	11.4951	11.4416	10.6303	11.241	11.3407	9.71509	10.1334	10.2525	ENST00000390323	IGLC2	immunoglobulin lambda constant 2 (Kern-Oz- marker)
16651247	0.0269903	0.985545	-0.239338	0.803851	0.262801	0.440537	-0.00352771	0.997073	-1.09935	0.000118341	-0.433345	0.362976	0.152767	0.782579	0.818773	0.00239434	0.119194	0.860791	0.00916082	0.997027		8.57027	8.41842	8.29193	8.75791	8.56444	8.52774	8.18452	8.22667	8.27221	10.2041	10.2271	10.223	9.01374	8.5248	8.57696	8.91297	8.59022	8.81551	8.77199	8.71318	8.59676	8.48647	8.37872	8.34138	NM_031917 // ENST00000253109 // AF230330	ANGPTL6	angiopoietin-like 6	83854
16793759	0.15556	0.753353	0.0236629	0.976347	-0.0711275	0.73202	-0.203024	0.332946	-1.09902	4.55309e-08	-0.448201	0.0133255	-0.0487742	0.888119	0.602041	0.000104841	0.133274	0.617411	0.155627	0.696648		8.31722	8.44812	8.5016	8.32378	8.49032	8.45631	8.50554	8.62057	8.59259	9.76988	9.80066	9.92556	8.81417	8.84536	8.82128	8.58659	8.71836	8.81445	8.59735	8.7066	8.69735	8.63782	8.71126	8.73174	NM_025228 // ENST00000367024 // ENST00000367025 // BC130417 // BC144139 // BC110302 // AK300555 // ENST00000367026 // AK125601 // ENST00000456166 // BX648450 // ENST00000010338 // ENST00000478359 // ENST00000341173 // AK126139 // ENST00000458110 // AK092905 // ENST00000474496 // ENST00000479796 // ENST00000476050 // ENST00000460314 // ENST00000471368 // ENST00000488702 // ENST00000467830 // ENST0…	TRAF3IP3	TRAF3 interacting protein 3	80342
16652417	-0.486872	0.829547	-0.201433	0.94227	-0.14893	0.87856	0.136509	0.929443	-1.0988	0.0623869	-0.206041	0.928861	-0.698121	0.458577	0.194642	0.809811	0.503704	0.664783	-0.0454875	0.992903		8.03902	8.26747	8.40134	8.28166	8.36578	8.48859	8.50551	8.80984	8.80482	7.0002	6.70064	6.82362	8.8481	8.8143	8.90678	8.68511	8.92694	8.82944	8.96504	8.97413	8.91722	8.75531	8.54463	8.55685
16669630	-0.187621	0.831078	0.10387	0.917134	-0.126823	0.70223	0.164668	0.720449	-1.09773	2.38398e-05	-0.380652	0.352382	-0.171889	0.694434	0.545188	0.017537	-0.268143	0.485024	-0.31321	0.563459		5.13578	5.48004	5.30135	5.03502	5.17156	5.38043	9.00144	9.12186	8.73664	7.80375	7.48918	6.84001	4.65974	4.97176	4.84075	4.89462	4.7797	4.38591	4.7848	5.32251	5.21264	4.47266	4.39724	4.76935	NM_001192 // ENST00000053243 // ENST00000435355 // Z29575 // ENST00000396495	TNFRSF17	tumor necrosis factor receptor superfamily, member 17	608
16681812	-0.539613	0.676416	-0.651839	0.653648	0.214579	0.684319	0.102353	0.915202	-1.09709	0.00311151	-0.593315	0.382039	-0.228212	0.760545	0.275566	0.530705	0.0498225	0.967149	-0.392968	0.713262		9.20885	9.23225	9.2799	9.3745	9.22313	9.29615	9.37649	9.30733	9.29622	8.4279	8.41968	8.33033	9.42806	9.4758	9.4861	9.33951	9.38628	9.42997	9.38384	9.41671	9.35467	9.3754	9.30151	9.33514	NM_001042533 // NM_032778 // NM_153182 // ENST00000333396 // ENST00000360258 // ENST00000394198 // AY456380 // ENST00000514314 // ENST00000442492 // ENST00000330299 // ENST00000503517 // ENST00000506682	MINA	MYC induced nuclear antigen	84864
16789149	-0.0946143	0.832469	0.101669	0.812021	0.0478193	0.785604	0.244103	0.0937776	-1.09582	2.91899e-09	-0.265506	0.114625	-1.79414	5.31913e-12	-0.96383	1.77914e-08	2.09431	3.65225e-13	0.252353	0.185026		6.08509	6.07724	6.18622	6.29439	6.22238	6.4227	4.5657	4.76835	4.94176	4.71333	5.01845	5.03269	6.5782	6.92972	7.01507	6.31377	6.71434	6.65627	7.09833	7.20034	7.03371	6.95141	7.0358	6.88751	NM_198524 // ENST00000352903 // AK294960	TEX9	testis expressed 9	374618
16833488	0.142769	0.770059	-0.0783642	0.886026	0.187992	0.264262	-0.0331417	0.926912	-1.09386	3.43178e-08	-0.030703	0.960064	-0.0164956	0.967374	1.04666	6.40311e-08	0.0101397	0.982163	-0.194348	0.544469		11.4847	11.4828	11.4875	11.5663	11.5388	11.5426	11.4951	11.5551	11.5211	10.6646	10.5163	10.6196	11.4397	11.5058	11.4071	11.5623	11.4496	11.4399	11.5021	11.4791	11.4539	11.2895	11.2619	11.2621	NM_199141 // ENST00000327064 // ENST00000344150 // BC046240	CARM1	coactivator-associated arginine methyltransferase 1	10498
16820927	0.183274	0.623794	-0.0818702	0.820833	0.077525	0.549829	-0.187619	0.133289	-1.09268	2.29584e-10	-0.300192	0.0156112	-0.0493255	0.816712	0.743166	5.42885e-08	0.107277	0.521985	-0.0195735	0.972834		8.94436	8.91665	8.87997	8.91805	8.96384	8.90919	8.83856	8.95341	9.02084	9.86314	9.88523	9.85831	9.0762	8.98581	9.00568	9.03899	9.02346	9.06955	9.19772	9.11096	9.15374	9.35493	9.38907	9.37945	NM_024874 // ENST00000325722 // BC014530 // AY163234 // AF275679 // AK302428 // AK316252 // ENST00000373258 // ENST00000335883 // ENST00000426982 // AB058740 // ENST00000440579 // ENST00000482929 // ENST00000478463 // ENST00000470388 // ENST00000494948 // AK097096 // ENST00000469892 // ENST00000485551 // ENST00000461312 // ENST00000492544 // ENST00000467109 // ENST00000473423 // ENST00000492888 /…	KIAA0319L	KIAA0319-like	79932
16692080	0.321723	0.711292	-0.392832	0.671592	1.22247	7.84919e-05	0.507911	0.113803	-1.09266	7.60335e-05	-0.0983649	0.92142	-0.398823	0.261115	0.595469	0.0184457	1.18176	0.000110276	-0.439524	0.36382		4.09395	4.04229	3.79007	3.81128	3.78755	3.74637	3.5494	4.18407	3.86746	6.44147	7.17845	7.03669	3.71963	3.91062	3.88179	3.52836	3.60493	3.89723	4.1067	3.83966	3.78443	4.03489	3.91572	4.1871
16789897	-0.362244	0.881956	0.207622	0.940092	-0.432712	0.59347	0.137153	0.929492	-1.09141	0.0662882	-0.036442	0.992305	-0.413956	0.720164	0.64101	0.330499	0.376789	0.780914	0.395545	0.870924		6.77856	6.02056	6.65078	7.39632	6.81527	6.82577	6.34168	6.36514	6.58279	9.4189	8.9151	9.13819	6.28979	6.58272	6.85326	6.44013	6.49598	6.28788	6.79443	6.64981	6.79937	5.89192	5.74781	5.92825	NR_029493 // AY699265	MIR21	microRNA 21	406991
16674285	0.289015	0.702069	0.072693	0.944998	-0.411437	0.111129	-0.627759	0.0154069	-1.08361	1.8251e-05	-1.08385	0.000163676	0.157778	0.712247	0.15754	0.553191	-0.32003	0.325687	0.249184	0.683679		5.32449	5.87505	5.84381	5.87935	5.90838	5.81102	7.30695	7.29625	7.36458	7.39363	7.33708	7.5326	7.77608	7.90657	7.9858	7.70286	7.96648	8.01895	7.98992	8.05051	8.00309	8.29918	8.2181	8.14603	NM_006393 // NM_213569 // NM_001173484 // ENST00000377122 // ENST00000417816 // BC110452 // BC110453 // BC126132 // BC126134 // AK295186 // AK294926 // AK316521 // ENST00000377187 // ENST00000430741 // ENST00000377159 // ENST00000377119 // ENST00000434381 // ENST00000493005 // ENST00000460652 // ENST00000481592 // ENST00000492325 // ENST00000473616 // ENST00000482754 // ENST00000464278 // CR616315	NEBL	nebulette	10529
16908985	0.0217749	0.967731	-0.0622499	0.883712	-0.225219	0.0704807	-0.309243	0.0139812	-1.08274	1.16207e-09	-0.160268	0.439685	-0.0768179	0.711898	0.845657	3.87032e-08	0.0562356	0.833043	0.204636	0.292912		8.1901	8.25133	8.25272	8.28951	8.38015	8.28187	6.90498	6.9638	6.82513	7.58933	7.44642	7.38944	7.95456	8.08232	8.06047	7.96343	8.11798	8.11069	7.9229	7.87374	7.81309	7.86206	7.65186	7.75918	NM_002037 // NM_153047 // NM_153048 // ENST00000368678 // ENST00000368682 // ENST00000368667 // ENST00000356013 // ENST00000229471 // M14333 // ENST00000354650 // ENST00000229470 // ENST00000496864 // ENST00000476769 // ENST00000467899 // ENST00000523322 // ENST00000462856 // ENST00000467921 // ENST00000471959 // ENST00000520518 // ENST00000491885 // ENST00000495927 // ENST00000518295 // ENST0000…	FYN	FYN oncogene related to SRC, FGR, YES	2534
16702071	0.0334028	0.953451	-0.0498052	0.923953	0.339237	0.0122629	0.256029	0.0825026	-1.08184	4.66595e-09	-0.463269	0.00204065	0.273673	0.0561545	0.892244	7.31611e-08	0.179193	0.294373	0.113629	0.758472		8.67436	8.62565	8.6334	8.93507	8.90557	8.91261	9.83466	10.037	9.91756	9.39869	9.58334	9.49565	8.888	8.6033	8.72626	8.86097	8.72231	8.5607	8.74603	8.86345	8.64818	7.99135	7.80252	7.64514	NM_145006 // ENST00000375472 // AY358190 // ENST00000375469 // ENST00000471462 // ENST00000465709	SUSD3	sushi domain containing 3	203328
16787693	0.226296	0.7898	-0.0386884	0.976632	0.161974	0.617762	-0.103011	0.852214	-1.08112	3.68109e-05	-0.67696	0.0265053	-0.740521	0.0057702	-0.336356	0.172988	0.5375	0.0565726	-0.364994	0.461756		3.65662	3.94073	3.77799	3.81774	4.01756	3.66802	3.91459	4.13537	3.66232	6.41995	7.32849	6.96907	4.14167	4.08976	4.21891	3.82609	4.28962	4.11952	3.95383	4.21731	4.08271	3.73651	3.90888	3.87157	NM_080284 // ENST00000284425 // AY028898 // ENST00000446604 // ENST00000420289	ABCA6	ATP-binding cassette, sub-family A (ABC1), member 6	23460
16774384	-0.23798	0.732178	-0.0762603	0.93446	-0.492106	0.0347634	-0.330386	0.243448	-1.08041	6.59227e-06	0.274987	0.512525	-0.897458	0.000202532	0.457937	0.0242826	-0.0935251	0.857856	-0.498877	0.104722		8.74823	8.79717	8.84495	8.80356	8.93118	8.90973	9.04329	9.05268	9.027	7.70254	7.69996	7.67491	8.90286	8.97432	8.96798	8.65377	8.99788	8.89175	9.02615	8.87461	8.82705	8.28738	8.22384	8.11709
16758052	0.0735122	0.95832	-0.0133623	0.99469	0.356572	0.322096	0.269698	0.606729	-1.08022	0.000386688	-0.459864	0.396115	1.27975	0.000212776	1.90011	4.9197e-07	-0.177281	0.793341	0.745901	0.0841709		11.1872	11.2138	11.1221	11.1708	11.2561	11.1977	11.3145	11.4482	11.3236	10.4508	10.4077	10.257	11.6	11.4074	11.443	11.4606	11.456	11.4283	11.6536	11.6009	11.5612	11.5615	11.4651	11.4883	NM_007235 // ENST00000332707 // AK292884	XPOT	exportin, tRNA (nuclear export receptor for tRNAs)	11260
16769879	-0.191422	0.779815	-0.000650635	0.999283	0.237592	0.315373	0.428363	0.0688563	-1.07915	3.21566e-06	-0.473334	0.0743989	-0.18974	0.562995	0.41608	0.0302203	0.975018	4.05085e-05	0.547687	0.0416399		8.71217	8.74339	8.70749	8.83891	8.76903	8.79399	8.78556	8.86316	8.81141	7.93002	7.90206	7.91988	8.80599	8.90769	8.77978	8.76912	8.76858	8.81634	8.75456	8.7971	8.78147	8.5057	8.37287	8.40971	NM_001247 // NM_001114089 // ENST00000376652 // ENST00000354989 // AK293256 // BC025980 // AF039916 // AK303786 // AY327581 // AK297954 // AK300028 // AK302395 // AK300514 // AK295242 // ENST00000433259 // ENST00000360031 // ENST00000376647 // ENST00000376635 // ENST00000376641 // ENST00000443525 // ENST00000438678 // ENST00000376666 // AK128412 // ENST00000433417 // ENST00000447877 // ENST000004…	ENTPD6	ectonucleoside triphosphate diphosphohydrolase 6 (putative)	955
16654539	-0.153958	0.875924	0.21253	0.811783	-0.37846	0.189899	-0.0119722	0.986574	-1.07809	5.49878e-05	-0.20543	0.758264	-0.0102266	0.990481	0.862436	0.000651201	-0.2116	0.653571	0.156634	0.875078		5.08712	5.39747	5.54002	5.6854	5.37531	5.3895	7.05656	6.94278	6.95915	8.89912	8.56836	8.51712	5.84932	5.92614	5.79965	5.77052	5.68829	5.75554	6.88656	6.74407	6.76908	6.72568	6.79557	6.66274	NM_004227 // ENST00000350796 // BC028717 // ENST00000396741 // ENST00000495176 // ENST00000461891 // ENST00000491641 // ENST00000482460 // ENST00000488964 // ENST00000478541 // ENST00000481329 // ENST00000465320 // ENST00000466543	CYTH3	cytohesin 3	9265
16684144	0.0162001	0.987164	-0.0086434	0.994286	0.136441	0.560465	0.111597	0.75751	-1.0774	9.50182e-07	0.290785	0.348167	-0.230486	0.382106	1.1377	4.90666e-07	0.576573	0.00382258	0.209647	0.644455		8.16316	8.08308	8.04213	8.17765	8.21864	8.1041	8.24951	8.55375	8.41666	7.09177	7.17219	7.14122	8.46917	8.37418	8.43024	8.45577	8.41945	8.55552	8.59413	8.71348	8.63788	7.96086	7.97231	7.81888	NM_030792 // ENST00000336898 // BC018771 // BC033391 // AY358477 // AK098808 // ENST00000376282 // ENST00000443276 // ENST00000443415 // ENST00000376270 // BC090053 // AL833941 // AK310490	GDPD5	glycerophosphodiester phosphodiesterase domain containing 5	81544
16654535	0.109341	0.907944	-0.0992454	0.91828	0.038154	0.921781	-0.170433	0.692948	-1.07508	2.04128e-05	-0.149612	0.832923	-0.120342	0.79947	0.805127	0.000540519	0.0472445	0.945484	-0.111252	0.911364		8.02221	7.70051	8.02714	8.0653	8.14871	8.16315	8.99351	9.03832	9.05544	9.26446	9.61273	9.42371	7.53874	7.81067	7.85026	7.55484	7.5445	7.69698	8.04451	8.24283	8.18537	7.48294	7.70634	7.65738
16884473	0.0546464	0.917193	-0.0787506	0.869986	0.108669	0.496831	-0.0247279	0.939898	-1.07499	7.37306e-09	-0.195632	0.382983	0.0508629	0.856294	0.930221	5.90929e-08	0.122684	0.579104	0.0648779	0.902848		7.18574	6.74989	7.07164	7.14872	7.08263	7.18026	7.00103	7.27772	7.26926	9.25976	9.43187	9.7622	7.20645	7.50535	7.273	7.2785	7.21311	7.2935	7.03252	7.41638	7.13428	7.46346	7.60309	7.43606	NM_173042 // NM_001145057 // NM_001039659 // NM_001039660 // NM_001145055 // ENST00000404792 // ENST00000393703 // ENST00000260049 // ENST00000337131 // ENST00000393705 // AF110801 // ENST00000343898 // ENST00000414358 // ENST00000497194	IL18BP	interleukin 18 binding protein	10068
16773662	0.0182303	0.971627	0.00814044	0.988866	0.0689008	0.617089	0.058811	0.782539	-1.07477	4.37521e-10	-0.110466	0.637437	0.180292	0.168602	1.1446	1.5896e-10	-0.0820895	0.681488	0.0293017	0.95248		6.48542	6.2954	6.37809	6.35107	6.55182	6.40197	5.76781	5.17169	5.40597	4.74612	5.28853	5.1863	9.43608	9.74744	9.63669	9.31732	9.83739	9.66087	7.741	7.31946	7.24022	6.85064	6.73274	6.67105	NM_004833 // ENST00000368130 // BC010940 // ENST00000368129 // ENST00000481829	AIM2	absent in melanoma 2	9447
16713603	0.118153	0.905741	-0.0707773	0.950672	0.671074	0.0120616	0.482144	0.103296	-1.0731	3.9958e-05	0.0508744	0.961388	0.338659	0.321807	1.46264	9.18952e-07	0.311834	0.391968	-0.0205803	0.991564		6.5294	5.78525	6.2923	6.53956	6.07938	5.92839	5.45547	5.30165	5.37758	5.26476	5.57233	5.41471	6.2041	6.22673	6.24332	6.0051	5.86635	6.35875	7.88842	7.71318	7.58137	8.28062	8.83142	8.75114	NM_001007176 // ENST00000399653 // BC017981 // ENST00000303202	C8orf22	chromosome 8 open reading frame 22	492307
16989861	0.295795	0.707957	-0.120488	0.898361	0.0113059	0.980023	-0.404977	0.191195	-1.07159	3.33171e-05	-0.405341	0.303237	-0.182486	0.672074	0.483759	0.0365939	0.20602	0.641397	0.0122274	0.995705		12.1278	12.1044	12.1287	12.2136	12.1308	12.1488	12.3575	12.3843	12.3324	11.1445	10.9113	11.1409	12.4429	12.4589	12.4874	12.663	12.4437	12.4612	12.2399	12.3461	12.3114	11.7823	11.5589	11.5853	NM_004710 // ENST00000225777 // BC000407	SYNGR2	synaptogyrin 2	9144
17053325	0.00667694	0.993618	-0.0763524	0.906658	-0.374019	0.0374107	-0.457048	0.0124706	-1.07076	2.52968e-07	-0.299012	0.237259	-0.459594	0.0106832	0.31215	0.048188	0.142964	0.632769	0.0573896	0.940005		5.99642	5.79888	6.21616	6.33465	5.97536	6.13321	5.87559	5.44693	5.33108	7.67767	7.93072	7.76182	6.66553	6.69295	6.70214	6.37849	6.65678	6.44504	6.50194	6.56304	6.42169	7.29258	7.39426	7.25342
16768675	-0.0122244	0.983639	-0.00408729	0.994772	-0.216183	0.0848314	-0.208046	0.135639	-1.06938	1.43647e-09	-0.451321	0.00102515	-0.0399676	0.876641	0.578092	6.62892e-06	-0.620656	8.92531e-06	-0.44444	0.0016105		5.47382	5.42133	5.46236	5.36145	5.16234	5.25424	5.43666	5.33084	5.32874	6.80444	6.85381	6.60572	5.30549	5.2977	5.18678	5.35799	5.25807	5.45423	5.44619	5.3167	5.34783	5.22989	5.46481	5.42855	NM_004088 // NM_001017520 // ENST00000371174 // ENST00000419175 // AB046378	DNTT	deoxynucleotidyltransferase, terminal	1791
16891491	0.0752401	0.926435	-0.0430124	0.96393	-0.12761	0.621895	-0.245862	0.389411	-1.06922	2.54883e-06	-0.043574	0.957826	-0.252817	0.36622	0.772829	0.000136647	-0.0201286	0.973641	-0.145336	0.832015		10.0305	9.90751	10.0053	10.1141	9.94857	10.1827	10.1742	10.0192	10.1448	8.86948	8.62943	8.83224	9.90729	10.0791	10.0088	9.89903	9.98397	9.96612	9.98194	10.1028	10.0822	9.94271	9.8997	9.82004	NR_034039 // NM_003104 // ENST00000267814 // BC021085	SORD	sorbitol dehydrogenase	6652
16769865	0.193904	0.738357	-0.113064	0.866492	0.814588	8.71277e-05	0.50762	0.0106101	-1.06817	7.81107e-07	-0.667238	0.00193669	-0.337808	0.118002	0.0631254	0.782114	1.59728	1.07727e-08	0.444884	0.0749177		9.39355	9.47419	9.42961	9.52681	9.30194	9.42087	9.48178	9.45096	9.41606	8.07205	8.07355	7.977	9.33138	9.68857	9.52563	9.30123	9.48546	9.45473	9.27377	9.44721	9.42553	9.13836	9.17717	9.15211	NM_016391 // ENST00000389158 // AF151875 // ENST00000341213 // ENST00000451293 // ENST00000502663 // ENST00000503849 // ENST00000504821 // ENST00000502577 // ENST00000510608	NOP16	NOP16 nucleolar protein homolog (yeast)	51491
16934786	0.0779325	0.773268	-0.0346394	0.917134	0.173516	0.0485783	0.0609442	0.675664	-1.0679	1.08751e-11	-0.156635	0.181712	-0.110577	0.320371	0.800689	6.14072e-10	0.267735	0.00224361	-0.0163578	0.970767		8.02793	8.06188	7.98556	8.18073	8.06326	8.26446	8.2394	8.2491	8.23294	9.43865	9.50785	9.53171	8.75083	8.71225	8.82524	8.61219	8.6336	8.78424	8.9315	8.82528	8.74079	9.32779	9.11177	9.11826	NM_000663 // NM_001127448 // NM_020686 // ENST00000396600 // ENST00000425191 // ENST00000268251 // AK290501	ABAT	4-aminobutyrate aminotransferase	18
16827574	0.170067	0.782436	-0.0368592	0.9666	0.502558	0.010432	0.295631	0.206262	-1.06635	9.34199e-07	-0.380189	0.132597	-0.284103	0.229643	0.402061	0.0195763	0.744073	0.00027657	-0.0425877	0.965199		7.53339	7.42958	7.20025	7.31137	7.40591	7.08132	9.16186	9.32605	9.33472	7.94394	8.12619	7.94537	6.85839	7.14455	7.00225	7.15098	7.03902	6.98329	6.97615	6.67643	7.23758	6.96416	7.12952	6.89261	NM_015720 // ENST00000342480 // AF219137 // ENST00000302192	PODXL2	podocalyxin-like 2	50512
16736656	-0.276625	0.917897	-0.221205	0.939143	-0.599071	0.457436	-0.54365	0.635677	-1.06376	0.0893753	-0.290945	0.899429	-0.380075	0.764996	0.392737	0.607637	-0.834137	0.386679	-0.615141	0.744162		10.2913	10.2757	10.0568	10.388	10.3859	10.3676	9.76514	10.0157	9.9258	11.5381	11.3574	11.5453	9.83632	9.66782	9.75514	9.79862	10.1882	9.85419	7.4224	8.19409	7.99379	6.55075	7.97743	7.51458
16991210	0.0771875	0.847399	0.020396	0.969745	0.331212	0.00446507	0.274421	0.0224561	-1.06316	6.79571e-10	0.512267	0.00011968	0.104452	0.54442	1.67988	7.68842e-13	0.344254	0.00319072	0.117493	0.670402		7.30471	7.21593	7.28177	7.32851	7.24448	7.16056	7.59526	7.83358	7.53514	9.09298	9.15868	8.96742	7.72747	7.46912	7.54847	7.34731	7.39557	7.4502	7.40368	7.37742	7.22985	7.69919	7.60103	7.58412	NM_173537 // NM_001003795 // ENST00000405086 // ENST00000302215 // AY312853 // AY312850 // ENST00000453619 // ENST00000427878 // ENST00000451013 // ENST00000312575 // ENST00000412484 // ENST00000423666 // ENST00000418185 // ENST00000472837 // ENST00000398546 // ENST00000484624 // ENST00000483059	GTF2IRD2 // GTF2IRD2B	GTF2I repeat domain containing 2 // GTF2I repeat domain containing 2B	84163 // 389524
17013657	0.349781	0.804756	-0.197557	0.900949	0.906	0.0429304	0.358662	0.609206	-1.06243	0.00609728	0.112492	0.943571	0.966063	0.0357572	2.14098	4.78577e-06	0.469112	0.462556	0.529175	0.564334		7.94054	7.88526	7.82358	8.04536	8.04829	8.01262	7.73747	7.887	7.85802	9.11961	9.10062	9.04404	8.3394	8.19381	8.20118	8.51268	8.28206	8.26679	8.28807	8.39664	8.18898	8.71083	8.66181	8.58958	NM_007110 // ENST00000262715 // BC126107 // ENST00000359243 // ENST00000471684	TEP1	telomerase-associated protein 1	7011
17118754	-0.018421	0.985937	-0.207333	0.757718	1.46021	1.64211e-07	1.2713	1.10213e-06	-1.06237	2.7172e-06	0.0952554	0.886492	-3.67363	1.67903e-13	-2.516	1.49232e-11	4.76456	1.83615e-15	-0.369276	0.258285		6.44268	6.26836	5.74229	6.12664	6.41829	6.45989	6.10296	6.21317	6.53503	6.05035	6.41841	6.19868	9.05468	9.02601	9.1895	9.08142	9.06623	9.09018	8.36371	8.2502	7.95098	8.61019	8.38152	8.4476
16978969	0.171331	0.630721	0.0494468	0.899395	-0.480007	5.28515e-05	-0.601892	3.3013e-06	-1.05986	2.90459e-10	-0.14172	0.442809	-0.00120477	0.996708	0.916936	2.14662e-09	-0.342875	0.00179468	0.135928	0.537083		5.01691	5.64788	5.32946	5.47935	5.09546	5.01108	7.62001	7.70089	7.62099	7.81306	7.69312	7.61976	7.67596	7.92286	7.72404	7.46168	7.63107	7.69917	7.73485	7.82508	7.81789	7.64794	7.77152	7.76284	NM_001127899 // NM_001127898 // NM_000084 // ENST00000427844 // ENST00000376088 // ENST00000450422 // ENST00000376091 // ENST00000307367 // ENST00000376108 // ENST00000432101 // X91906 // ENST00000482218	CLCN5	chloride channel 5	1184
16786607	0.125624	0.74765	-0.0118591	0.985702	0.405529	0.00182031	0.268046	0.0488598	-1.05967	2.98536e-09	-0.229922	0.18545	0.266788	0.0480953	1.09654	1.76094e-09	0.126553	0.51244	-0.0121877	0.988844		8.93155	8.8871	8.94575	9.06822	9.02558	8.96981	8.15223	7.99138	7.94419	7.79823	7.71872	7.74567	8.89591	8.94331	8.88784	8.74402	8.731	8.81776	8.80414	8.84653	8.78384	8.70138	8.71775	8.79528	NM_018710 // ENST00000285419 // BC033892 // ENST00000518869 // ENST00000518359 // ENST00000520709	TMEM55A	transmembrane protein 55A	55529
16650201	0.821801	0.834904	-0.0308056	0.996092	0.387092	0.804356	-0.465515	0.844662	-1.05958	0.336571	-0.468877	0.901218	-0.173207	0.950465	0.417494	0.757256	0.584749	0.810267	0.0244503	0.997556		8.52093	8.4729	8.54505	8.66998	8.5478	8.63835	8.78421	8.79838	8.85819	7.75456	7.62404	7.66486	8.63686	8.60804	8.69123	8.86149	8.57978	8.73852	8.72729	8.68878	8.69123	8.4895	8.37528	8.38112	NM_001005291 // NM_004176 // ENST00000355815 // ENST00000261646 // U00968 // BC057388 // BC063281 // AK293795 // AK297113 // AK294800 // AB373958 // AB373959 // AB209609 // ENST00000338854 // ENST00000395751 // ENST00000418712 // ENST00000423161 // ENST00000395757 // ENST00000435530 // ENST00000395756 // AK095325 // ENST00000447641 // S66168 // ENST00000471445 // ENST00000490796 // ENST0000046935…	SREBF1	sterol regulatory element binding transcription factor 1	6720
16657215	-0.00420773	0.997496	-0.216646	0.849436	0.0926475	0.840115	-0.119791	0.864365	-1.05939	0.00045636	-0.469248	0.375322	0.203106	0.718434	0.793249	0.0065938	-0.0431163	0.962793	0.0673419	0.967921		7.425	7.34732	7.25952	7.4574	7.4888	7.30775	8.53748	8.57609	8.5561	8.11913	8.0962	8.08731	8.1485	8.13264	8.00834	8.17921	8.06434	8.05488	8.04483	8.08121	7.92535	7.78526	7.73821	7.67082	NM_015124 // ENST00000406902 // ENST00000361034 // AB018310 // ENST00000418035 // ENST00000424413 // ENST00000431155	GRAMD4	GRAM domain containing 4	23151
16755269	0.0511044	0.904037	-0.00766917	0.989191	0.169918	0.144135	0.111144	0.493854	-1.05848	4.82783e-10	-0.525778	6.42812e-05	-0.13268	0.372995	0.400023	0.000176896	-0.0509612	0.836016	-0.35356	0.00659959		10.4411	10.4754	10.4471	10.6099	10.5402	10.5192	7.71289	7.18957	7.29453	7.05034	6.96	7.48797	7.92066	8.48428	8.41799	7.76014	8.11392	8.31311	9.4356	9.43068	9.66515	9.53942	9.53002	9.69684	NM_004988 // ENST00000356661 // BC017555	MAGEA1	melanoma antigen family A, 1 (directs expression of antigen MZ2-E)	4100
16656595	-0.0210348	0.990012	0.0117642	0.994772	-0.0295366	0.959755	0.00326242	0.997271	-1.05829	0.000861836	-0.149675	0.895826	0.0813966	0.919636	0.990006	0.00178427	-0.127393	0.874234	-0.01646	0.995695		8.39369	8.07279	7.95067	8.32145	8.19532	7.90127	8.05412	7.69016	7.87345	9.79653	9.48493	9.18201	7.98057	8.02304	7.92716	7.55238	8.04509	7.86252	7.33548	7.61639	7.28517	6.36238	6.60776	6.82401
16750701	0.316918	0.583618	0.0195809	0.981871	0.286254	0.108149	-0.0110831	0.979958	-1.05808	2.11982e-07	-0.149531	0.702295	-0.0487164	0.898169	0.859837	3.54547e-06	0.54293	0.0019548	0.207959	0.564334		9.24387	8.97867	9.11102	9.17217	9.18148	9.15774	8.99272	9.19204	9.2395	10.0879	10.2877	10.3697	8.62519	9.07263	9.18937	8.69858	8.94093	9.06244	8.76661	9.08841	9.123	7.56321	7.86748	7.97455	NM_004271 // ENST00000379953 // ENST00000230568 // BC038846	LY86	lymphocyte antigen 86	9450
16735873	0.0658197	0.874149	-0.0942292	0.796032	0.166572	0.156123	0.00652322	0.981719	-1.05791	5.33985e-10	-0.276521	0.0342903	0.145042	0.315772	0.926433	3.35964e-09	0.0875418	0.650224	0.0660114	0.871514		10.5434	10.4388	10.4415	10.5189	10.4458	10.4919	10.1515	10.0074	10.0425	11.2282	11.1432	11.1342	10.9656	10.8589	10.9187	10.8755	10.8753	10.871	11.0507	10.9481	10.8237	11.2059	11.3189	11.347	NM_170662 // ENST00000264122 // BC032851 // AK292792 // U26710 // AK302533 // AK316276 // DQ349203 // DQ349204 // U26712 // U26711 // AK302892 // ENST00000403724 // ENST00000394027 // ENST00000405772 // AB075490 // AK123147 // AK130668 // BC065915 // ENST00000443752 // ENST00000476370 // ENST00000394030 // CR749655 // ENST00000407712 // ENST00000447441 // ENST00000438603	CBLB	Cas-Br-M (murine) ecotropic retroviral transforming sequence b	868
16797524	-0.184291	0.755046	0.0490367	0.952539	-0.152688	0.489572	0.0806404	0.834491	-1.05656	8.28093e-07	-0.208241	0.57462	-0.109623	0.744753	0.738699	7.4764e-05	-0.0441167	0.929899	-0.00105239	0.999054		11.0539	11.133	10.9516	11.1332	11.1042	11.1445	11.0862	11.1271	11.0862	10.3999	10.3083	10.3067	11.4188	11.3177	11.2165	11.5518	11.3781	11.3177	11.447	11.4293	11.3631	11.58	11.5555	11.4369	NM_003045 // ENST00000380752 // BC063303	SLC7A1	solute carrier family 7 (cationic amino acid transporter, y+ system), member 1	6541
16703452	0.0437458	0.943403	-0.0036038	0.996294	-0.047456	0.817867	-0.0948056	0.722163	-1.05618	3.27227e-08	-0.268957	0.192023	0.0634045	0.831352	0.85063	6.44382e-07	-0.108783	0.684772	0.00207763	0.998015		5.74288	5.59339	5.58108	5.44125	5.64927	5.61798	5.33192	5.56837	5.6926	7.59748	8.24951	8.33571	5.77542	5.81525	5.81782	6.02423	5.59329	5.70529	5.65361	5.77028	5.56868	5.74086	5.659	5.76973	NM_020760 // ENST00000260983 // BC117194 // ENST00000462290	HECW2	HECT, C2 and WW domain containing E3 ubiquitin protein ligase 2	57520
17122840	0.0452119	0.96868	0.0468586	0.968959	0.208326	0.486895	0.209973	0.612664	-1.054	3.81059e-05	-0.127159	0.874507	-0.0930802	0.861572	0.833762	0.000532504	0.15127	0.767814	-0.150137	0.873071		9.25515	8.97395	9.24508	9.45356	9.30515	9.37054	9.27542	9.14214	9.26526	7.83928	7.57761	7.81887	9.39866	9.59895	9.60268	9.49448	9.46512	9.62091	9.4196	9.49191	9.46453	9.19293	9.11326	9.10354	NM_021724 // ENST00000246672 // M24898 // M24900	NR1D1 // THRA	nuclear receptor subfamily 1, group D, member 1 // thyroid hormone receptor, alpha (erythroblastic leukemia viral (v-erb-a) oncogene homolog, avian)	9572 // 7067
16685482	-0.0113756	0.985149	-0.0571427	0.89612	0.0973939	0.490117	0.0516267	0.834092	-1.05319	1.78951e-09	-0.0345531	0.93594	0.0413412	0.870646	1.05998	1.52879e-09	-0.0118416	0.973215	-0.0678942	0.878647		11.7009	11.7794	11.6792	11.7126	11.7743	11.7418	11.7817	11.7745	11.7518	10.9181	10.7616	10.7052	11.7642	11.8699	11.7925	11.7194	11.7489	11.7735	11.6725	11.7383	11.7655	11.6548	11.6395	11.6861	NM_004728 // ENST00000354185 // BC008071	DDX21	DEAD (Asp-Glu-Ala-Asp) box polypeptide 21	9188
17097560	0.0536749	0.907356	0.00683512	0.992708	0.338225	0.00609879	0.291385	0.0221895	-1.05262	1.83374e-09	-0.762935	1.53841e-06	-0.128157	0.456372	0.161528	0.152694	0.564667	2.91113e-05	0.0982849	0.780976		9.05559	9.19823	9.24335	9.29744	9.17829	9.2949	9.2154	9.4388	9.39534	9.65563	9.58895	9.46627	8.45235	8.358	8.39775	8.47877	8.28947	8.18611	8.32486	8.29925	8.29729	8.2539	8.25134	8.13999	NM_017851 // ENST00000261888 // BC006389 // ENST00000432843 // ENST00000444347	PARP16	poly (ADP-ribose) polymerase family, member 16	54956
16651207	0.339939	0.920353	-0.952589	0.733512	-0.383923	0.739406	-1.67645	0.0858101	-1.051	0.196416	0.121374	0.973928	-1.05038	0.374504	0.122002	0.916281	0.385087	0.847122	-0.281366	0.941577		6.66328	6.60498	6.63665	6.65541	6.64231	6.68839	7.04358	6.98452	7.10304	7.6701	7.67136	7.77904	6.70476	6.66549	6.69443	6.5426	6.66441	6.6	6.62062	6.72459	6.71263	6.82543	6.7569	6.80981	NM_198321 // ENST00000297107 // AB078145 // ENST00000377661 // ENST00000427235 // ENST00000377657 // ENST00000425427 // ENST00000520647 // ENST00000517958 // ENST00000521781 // ENST00000519571 // ENST00000519544 // ENST00000521786	GALNT10	UDP-N-acetyl-alpha-D-galactosamine:polypeptide N-acetylgalactosaminyltransferase 10 (GalNAc-T10)	55568
17120106	-0.00190847	0.99871	-0.0344075	0.980554	0.345698	0.257618	0.313199	0.424786	-1.05047	0.000108929	-0.00807573	0.996292	0.266076	0.524041	1.30847	9.36583e-06	0.262911	0.555725	0.183289	0.84693		9.71709	9.55891	9.60903	9.69797	9.58701	9.71872	9.72644	9.52895	9.54812	10.6663	10.6863	10.616	9.75655	9.77249	9.7258	9.70894	9.70815	9.75907	9.80892	9.79749	9.72624	10.1349	10.1958	10.2342	NM_001007231 // NM_014882 // NM_001166276 // NM_001166277 // ENST00000409030 // ENST00000409202 // AK298669 // AK290396 // BC039591 // AK297157 // AK297056 // AK303591 // ENST00000295381 // ENST00000497079 // ENST00000473986 // ENST00000463483 // ENST00000488795 // ENST00000456116 // ENST00000485700 // ENST00000485573 // ENST00000409220 // ENST00000482106 // ENST00000467265 // ENST00000497259 // …	ARHGAP25	Rho GTPase activating protein 25	9938
16656539	-0.252781	0.797523	-0.0824459	0.950324	-0.202083	0.583573	-0.0317481	0.966086	-1.04735	0.000259771	0.124802	0.901218	-0.0364481	0.962737	1.13571	0.000123366	-0.342145	0.431511	-0.17651	0.874605		8.00951	7.83648	8.08196	8.14568	8.14643	8.0941	6.30441	6.82168	6.5204	7.69219	7.8941	7.75497	8.32108	8.11687	8.21799	8.02289	8.15061	8.1383	8.48285	8.46362	8.31362	8.63177	8.47024	8.59844	NM_002184 // NM_175767 // NM_001190981 // ENST00000381298 // ENST00000336909 // ENST00000381287 // M57230 // ENST00000503773 // ENST00000381294 // ENST00000502326 // ENST00000522633 // ENST00000506241	IL6ST	interleukin 6 signal transducer (gp130, oncostatin M receptor)	3572
16714880	0.177386	0.685836	-0.0314196	0.960795	-0.112405	0.49744	-0.32121	0.0329205	-1.04676	1.80055e-08	-0.247445	0.217691	0.136055	0.514528	0.935367	8.98167e-08	-0.0780271	0.789352	0.170433	0.571522		4.56844	4.38882	4.36847	4.35587	4.27673	4.00628	4.44173	4.60192	4.39801	6.08017	6.15505	6.29501	4.45295	4.39106	4.17897	4.35838	4.48802	4.39879	4.36616	4.15573	4.33532	4.45044	4.51078	4.20952	NM_002185 // ENST00000303115 // BC067537 // BC069999 // BC067540 // BC067538 // BC067539 // M29696 // AK301220 // FJ529208 // ENST00000506850 // ENST00000426051 // ENST00000343305 // ENST00000514217 // ENST00000508941 // ENST00000509668 // ENST00000511982 // ENST00000505875 // ENST00000505093 // ENST00000511031	IL7R	interleukin 7 receptor	3575
16933062	0.105038	0.82148	-0.0486013	0.932451	0.232798	0.109559	0.0791585	0.759873	-1.0464	1.49278e-08	-0.238775	0.235535	-0.980541	1.1629e-07	-0.172912	0.190393	1.03664	5.90626e-08	-0.1767	0.539045		3.30218	2.82438	3.31874	3.06061	2.69294	3.11699	2.97185	2.93528	3.14791	2.4375	2.66284	2.79828	3.71822	4.11466	4.08434	3.89067	4.31659	3.56356	5.93091	6.0878	5.74262	5.87142	6.27902	5.63425
16651231	0.1437	0.910437	-0.191892	0.870805	0.317788	0.401152	-0.0178044	0.983762	-1.04565	0.00067864	-0.166256	0.873529	-0.193772	0.744294	0.685619	0.0215847	0.488976	0.234777	-0.0225838	0.993253		9.31668	8.99546	9.26609	9.46503	9.17794	9.2485	9.17062	9.24096	9.27616	7.50875	7.54268	7.6264	9.29656	9.13951	9.44064	9.188	9.24401	9.38474	9.39666	9.45466	9.45373	9.03621	8.7894	8.81306	NM_145256 // ENST00000339007 // ENST00000392406 // BC025744	LRRC25	leucine rich repeat containing 25	126364
17053316	-0.0262435	0.945085	-0.136334	0.662561	-0.29178	0.00189685	-0.401871	7.13111e-05	-1.04453	3.99091e-11	-0.259621	0.0125231	-0.441141	1.79311e-05	0.343769	0.000112134	0.0469349	0.809251	-0.102425	0.617602		8.8755	8.95305	9.02579	8.99644	8.91241	8.97483	9.17659	9.11644	9.05413	7.99689	7.83857	7.71712	9.27108	9.27825	9.41766	9.38022	9.247	9.16664	9.22435	9.19614	9.24146	9.1963	9.03355	9.16237
16656583	-0.366412	0.729654	0.0501249	0.977594	-0.19203	0.661904	0.224507	0.717297	-1.04388	0.00101164	-0.124686	0.918903	-0.0697139	0.93443	0.849478	0.0065	-0.246364	0.6988	-0.124048	0.933928		10.3456	10.2711	10.365	10.4996	10.2541	10.4868	9.76523	10.0361	9.98355	9.27686	9.15523	9.43705	8.17485	8.40936	8.51666	8.4651	8.41737	8.73816	8.7761	8.7408	8.64552	8.50615	8.41524	8.56186	NM_006087 // ENST00000264071 // BC013683 // ENST00000412858	TUBB4	tubulin, beta 4	10382
16872567	0.121749	0.699393	0.00269608	0.996092	-0.043336	0.751675	-0.162389	0.192018	-1.04334	2.29584e-10	-0.134972	0.4542	0.0254191	0.915378	0.933788	1.07526e-09	-0.119333	0.413612	-0.0505782	0.90137		10.0913	10.0484	10.084	9.80984	10.2489	9.74717	9.45897	9.33378	9.65976	9.4582	9.3074	9.44546	9.20435	9.24176	9.36662	8.66402	9.50152	9.23357	7.11837	7.89218	7.42402	6.09184	5.77985	6.31607
16819325	0.0692848	0.877881	-0.0635899	0.886026	0.54008	8.22699e-05	0.407205	0.00188561	-1.04187	3.50525e-09	-0.338684	0.0189095	0.0461262	0.85857	0.749311	3.58978e-07	0.453922	0.000544833	-0.0400319	0.941768		9.72068	9.62185	9.60141	9.81575	9.76526	9.65137	10.1457	10.1263	10.2789	8.86324	8.50206	8.38221	9.353	9.33698	9.3273	9.35565	9.47152	9.30091	9.2606	9.36287	9.33769	8.81523	8.67855	8.61981	NM_198253 // NM_001193376 // ENST00000310581 // AF015950 // ENST00000448937 // ENST00000296820 // ENST00000334602 // ENST00000460137 // ENST00000508104 // ENST00000484238 // ENST00000503656	TERT	telomerase reverse transcriptase	7015
16697395	-0.120058	0.929702	0.397507	0.717503	-0.474153	0.196408	0.0434122	0.959243	-1.0415	0.000944561	0.191369	0.85186	-0.4753	0.275405	0.757565	0.0138099	0.0996445	0.907855	0.0984973	0.948603		8.30992	8.18081	8.30977	8.44818	8.28643	8.34218	8.66337	8.64729	8.76684	7.60036	7.49261	7.62664	8.5955	8.61777	8.73709	8.71512	8.69747	8.69411	8.5251	8.67072	8.72275	8.44387	8.43057	8.41753	NM_201266 // NM_003872 // NM_201279 // NM_018534 // NM_201267 // NM_201264 // ENST00000360409 // ENST00000357785 // ENST00000272849 // ENST00000357118 // ENST00000412873 // ENST00000355117 // ENST00000417189 // BX537423 // BC117413 // BC143608 // AF022860 // AF280545 // AF280544 // AF016098 // BC101525 // BC104770 // BC143238 // AF022859 // AF280546 // AK290934 // BC009222 // AL833606 // AK130198…	NRP2	neuropilin 2	8828
16717775	0.080492	0.872491	0.0172481	0.979979	-0.072933	0.666791	-0.136177	0.484704	-1.04043	8.66352e-09	-0.222447	0.259191	-0.110514	0.599411	0.707469	1.84854e-06	-0.021729	0.952801	-0.0593098	0.912256		8.79016	8.75008	8.6965	8.77796	8.85219	8.87319	8.0117	7.90374	7.58672	7.77704	7.84673	7.73165	9.42665	9.41225	9.33266	9.65516	9.3744	9.30432	9.43091	9.51478	9.30998	9.39163	9.4272	9.37166	NM_018667 // ENST00000219334 // BC041828	SMPD3	sphingomyelin phosphodiesterase 3, neutral membrane (neutral sphingomyelinase II)	55512
17043965	0.137311	0.824266	0.0214609	0.98133	0.221017	0.269266	0.105167	0.756949	-1.04006	6.90445e-07	0.403434	0.0755912	0.832309	3.947e-05	2.2758	1.00764e-11	-0.370367	0.0612896	0.240925	0.514066		10.2253	10.175	10.2156	10.231	10.2665	10.3324	10.2762	10.344	10.3045	11.3846	11.3948	11.2098	10.1684	10.1646	10.1111	10.2756	10.0604	10.0639	9.89268	10.0938	10.0613	10.0573	10.1841	10.1683	NM_001130955 // NM_015318 // ENST00000359920 // ENST00000319670 // BC077721 // ENST00000398026	ARHGEF18	Rho/Rac guanine nucleotide exchange factor (GEF) 18	23370
17010941	0.0502931	0.907285	-0.034684	0.941769	0.167754	0.160037	0.0827771	0.66458	-1.03789	8.57075e-10	-0.0820761	0.772993	-0.0154766	0.956387	0.940336	3.3611e-09	0.307904	0.00785131	0.124673	0.627355		4.03415	3.92595	3.80046	3.44437	3.91898	4.21479	3.77499	3.67366	3.93145	3.43422	4.15234	4.04405	4.45944	4.39106	4.3407	4.34779	4.18656	4.2094	6.19564	6.33922	6.24234	6.56947	6.96432	7.11194	NM_000055 // ENST00000264381 // M16541 // ENST00000482958 // ENST00000497011	BCHE	butyrylcholinesterase	590
16656629	-0.0368013	0.984139	-0.429156	0.722022	0.384027	0.36076	-0.00832849	0.993436	-1.03696	0.0021613	-0.0419323	0.979642	-0.0513027	0.956387	0.943723	0.00518834	0.1064	0.910595	-0.328929	0.744865		7.08883	7.13026	7.22137	7.36173	7.02246	7.0485	7.3981	7.44698	7.20092	7.49913	7.74088	7.4372	5.53367	5.63055	5.65405	5.72811	5.76583	5.77564	5.46517	5.63736	5.92273	5.77455	5.68872	5.74551	NM_001128227 // NM_005476 // NM_001190388 // NM_001190383 // NM_001190384 // ENST00000339267 // ENST00000396594 // ENST00000377902 // AK296687 // ENST00000447283 // ENST00000486079	GNE	glucosamine (UDP-N-acetyl)-2-epimerase/N-acetylmannosamine kinase	10020
16656831	-0.276012	0.900994	-0.432649	0.826199	0.0209908	0.983765	-0.135646	0.921158	-1.0361	0.0464912	-0.458916	0.74789	0.140439	0.917713	0.717627	0.196027	-0.254502	0.848786	-0.135053	0.961655		11.0602	11.0453	11.0089	11.1003	11.0127	11.0562	10.9816	10.9506	10.936	9.77763	9.819	10.0472	11.1817	11.054	11.0854	11.1044	11.0613	11.1798	11.2346	11.055	11.1194	11.0834	10.9994	10.9948	NM_001629 // ENST00000380490 // BC018538 // ENST00000479597	ALOX5AP	arachidonate 5-lipoxygenase-activating protein	241
16692433	-0.160896	0.884982	-0.292822	0.763605	0.104245	0.800236	-0.0276803	0.971049	-1.03422	0.000267741	-0.579367	0.147906	-0.0410445	0.956397	0.413807	0.139113	-0.446495	0.225779	-0.591785	0.174777		9.93819	9.8406	9.98988	10.0012	9.93528	10.0821	10.3335	10.4136	10.4008	9.47245	9.36013	9.53527	10.5141	10.5081	10.5607	10.59	10.4494	10.5417	10.7399	10.6706	10.6901	10.7135	10.5165	10.5166	NM_001035254 // NM_203305 // ENST00000373095 // ENST00000373084 // BC137087 // ENST00000465821 // ENST00000300434 // ENST00000464641 // ENST00000479828 // ENST00000493175 // ENST00000494606	FAM102A	family with sequence similarity 102, member A	399665
16657205	-0.165112	0.891674	-0.18545	0.869986	0.0170351	0.975452	-0.00330268	0.997271	-1.03388	0.000525966	-0.266327	0.726426	-0.0838679	0.908577	0.683683	0.0173699	0.00784641	0.995006	-0.0930566	0.947614		7.65331	7.6617	7.4066	7.84269	7.7585	7.89519	7.21877	7.19467	7.28688	6.77454	7.06794	6.99996	7.79635	7.78071	7.78576	7.73793	7.68299	7.86417	7.98148	8.0539	7.83098	8.38583	8.29528	8.35263	NM_003060 // ENST00000245407 // AB209484 // ENST00000435065 // ENST00000424824 // ENST00000447841 // ENST00000448810 // ENST00000437841 // ENST00000461013 // ENST00000475308 // ENST00000479605	SLC22A5	solute carrier family 22 (organic cation/carnitine transporter), member 5	6584
17019169	0.0230648	0.962519	0.0269977	0.958564	-0.304395	0.009099	-0.300463	0.0120568	-1.03231	1.13935e-09	-0.385806	0.00277573	-0.72098	5.60781e-07	-0.0744733	0.542722	0.354814	0.00250542	-0.0617711	0.885583		7.96672	7.89307	7.98498	8.00322	8.01767	8.0437	8.09511	8.0942	8.27265	9.10056	9.06826	9.15496	7.9902	7.88854	7.9759	8.00676	7.85671	7.93783	7.95327	7.9255	7.82809	8.11132	8.09457	8.00448	NM_015037 // ENST00000398706 // ENST00000412198 // BC151206 // ENST00000436194 // ENST00000414462 // ENST00000412131 // ENST00000433366 // ENST00000446546 // ENST00000451629 // ENST00000431225 // ENST00000492395 // ENST00000466568 // CR610954	KIAA0913	KIAA0913	23053
16859281	0.0779947	0.82397	-0.0147502	0.978193	0.0659696	0.605591	-0.0267753	0.911803	-1.03221	2.90441e-10	-0.264231	0.0299466	-0.224661	0.0427067	0.54332	2.2008e-06	0.276182	0.00973842	-0.0144481	0.981143		9.07036	9.13148	9.00138	9.14908	9.1218	9.1602	9.20392	9.23394	9.1786	8.47555	8.52083	8.50541	9.22917	9.35553	9.31014	9.33655	9.40339	9.39422	9.34449	9.41641	9.34117	9.36429	9.32563	9.35317	NM_006549 // NM_153499 // NM_172216 // NM_153500 // NM_172226 // NM_172214 // NM_172215 // ENST00000324774 // ENST00000337174 // ENST00000347034 // ENST00000392474 // ENST00000392473 // ENST00000402834 // ENST00000412367 // ENST00000404169 // ENST00000360452 // AF287630 // ENST00000446440	CAMKK2	calcium/calmodulin-dependent protein kinase kinase 2, beta	10645
16832231	-0.0550037	0.943588	0.128985	0.84391	-0.0481322	0.859596	0.135856	0.669883	-1.02998	1.06036e-06	-0.0843063	0.889338	-0.24914	0.303532	0.696533	0.000135843	0.132092	0.703146	-0.068916	0.932589		6.26375	6.16046	6.50613	6.28976	5.99264	6.42295	6.75067	6.91279	7.0333	8.79094	8.71358	8.85029	7.14402	7.25045	7.2993	7.16407	7.26602	6.92896	6.71294	6.7658	6.80177	7.06067	7.07049	6.89415	NM_001987 // ENST00000266427 // BC043399 // ENST00000396373	ETV6	ets variant 6	2120
17090320	0.211839	0.865768	0.198879	0.867403	0.348148	0.358223	0.335187	0.500792	-1.02973	0.000894223	0.82084	0.0401033	0.305398	0.552061	2.15597	1.45126e-07	0.323415	0.542551	0.280665	0.772109		8.15941	8.08533	8.2922	8.25115	8.09085	8.36222	7.197	7.0881	7.12778	8.25121	8.26163	8.41898	6.90732	7.04669	6.87704	6.82183	6.94335	6.98017	6.95301	6.91276	6.7044	6.91466	6.9485	6.88704	NM_183013 // NM_183011 // NM_182723 // NM_182853 // NM_183012 // NM_182722 // NM_181571 // NM_182717 // NM_182720 // NM_182721 // NM_183060 // NM_182725 // NM_182769 // NM_182771 // NM_182850 // NM_182724 // NM_182770 // NM_182772 // NM_182718 // NM_182719 // NM_001881 // ENST00000337656 // ENST00000395897 // ENST00000374734 // ENST00000345491 // ENST00000356917 // ENST00000374728 // ENST00000361…	CREM	cAMP responsive element modulator	1390
16651223	-0.0155379	0.991769	0.060818	0.967411	-0.393028	0.262949	-0.316672	0.507636	-1.02924	0.00056573	-0.299858	0.670503	0.0217201	0.979837	0.751105	0.00934994	0.0654958	0.94094	0.480244	0.399918		6.30303	6.15213	6.0549	6.15919	6.39492	6.36898	6.48053	6.62194	6.4897	8.69946	8.88782	8.48983	6.72034	7.22955	7.09786	6.74408	7.11499	7.10294	7.53048	7.51601	7.38107	7.68931	7.87658	7.76753	NM_004310 // ENST00000381799 // ENST00000505618 // BC014261 // ENST00000508513 // ENST00000511121 // ENST00000507851 // ENST00000503941 // ENST00000514839 // ENST00000513894 // ENST00000515702 // ENST00000515718 // ENST00000515503 // ENST00000503978 // ENST00000503754 // ENST00000511967 // ENST00000504638	RHOH	ras homolog gene family, member H	399
16901068	0.0622563	0.923196	-0.130654	0.807937	0.805056	1.8242e-05	0.612146	0.000494094	-1.02818	1.86522e-07	-0.737599	0.000122023	-0.175536	0.452343	0.115046	0.506186	1.19447	8.11564e-08	0.213873	0.521102		9.40916	9.38431	9.18151	9.49556	9.44403	9.34048	9.30607	9.63547	9.48129	8.04697	7.84953	7.82151	8.50933	8.38991	8.53645	8.47314	8.47769	8.3576	8.46431	8.67986	8.44911	7.60295	7.67985	7.50618	NM_001134382 // NM_014869 // ENST00000435445 // ENST00000273221 // ENST00000429247 // AY653734 // AK294525 // BC010267 // ENST00000452608 // ENST00000450726 // ENST00000474467	IQSEC1	IQ motif and Sec7 domain 1	9922
16781827	0.154074	0.833863	-0.0254042	0.980829	0.988103	3.53237e-05	0.808624	0.000389798	-1.02801	5.38525e-06	-1.71322	5.25609e-08	1.27458	1.13374e-06	0.58936	0.00237231	-1.21535	2.26641e-06	-0.92888	0.000258614		9.41928	9.38294	9.1981	9.58637	9.43359	9.41839	10.1738	10.2912	10.1876	10.7448	10.7204	10.5258	9.78871	9.78207	9.63794	9.80397	9.63403	9.73969	9.69871	9.64677	9.54463	9.40412	9.22866	9.19669	NM_007368 // ENST00000334062 // X89399 // ENST00000389544	RASA3	RAS p21 protein activator 3	22821
16847719	-0.00310203	0.995206	-0.0364273	0.939143	0.396589	0.00092478	0.363264	0.00241315	-1.02774	1.2488e-09	-0.597378	2.06524e-05	0.12461	0.44159	0.554977	5.94188e-06	0.0355679	0.899893	-0.236412	0.142523		8.95069	9.02341	8.95666	9.03141	8.95011	8.99339	9.03644	8.95807	9.0106	7.36896	7.28707	7.75941	8.2992	8.37698	8.28414	8.3156	8.30382	8.37731	8.26485	8.34219	8.25588	8.08688	8.01377	7.82029	NM_003923 // ENST00000377317 // AF076292 // ENST00000292541	FOXH1	forkhead box H1	8928
16721732	-0.233682	0.819321	-0.137423	0.901783	-0.122191	0.763582	-0.0259322	0.973054	-1.02653	0.000341847	-0.253962	0.725256	-0.29089	0.521377	0.481683	0.0846563	-0.184869	0.760184	-0.353567	0.596909		8.52891	8.47244	8.48558	8.79996	8.60007	8.58988	9.68338	9.59186	9.61846	9.74369	9.83123	9.77079	9.67167	9.75256	9.70237	9.67178	9.57655	9.72146	9.6134	9.62895	9.767	9.79661	9.64455	9.70661	NM_033271 // ENST00000392554 // BC042525 // ENST00000327471 // ENST00000463376 // ENST00000392553	BTBD6	BTB (POZ) domain containing 6	90135
16654527	-0.102136	0.917012	-0.0251553	0.985219	-0.0508291	0.895274	0.0261519	0.966985	-1.02645	4.72586e-05	-0.119168	0.883367	-0.089887	0.866363	0.817393	0.000597146	-0.028976	0.968759	-0.068034	0.95116		7.27173	7.10218	7.04369	7.15878	7.17688	7.1778	7.49371	7.5307	7.64819	8.37249	8.40055	8.30477	7.27761	7.04164	7.22951	7.26643	7.08524	7.09051	7.00788	7.0171	6.85378	7.10012	7.11805	7.07745	NM_032682 // NM_001012505 // ENST00000318789 // ENST00000475937 // ENST00000498215 // AF250920 // AF146696 // BC005055 // BC071893 // BC080521 // BC054815 // AK297649 // AB052767 // BT006643 // CR457164 // ENST00000327590 // ENST00000318796 // ENST00000342334 // AK122710 // ENST00000339693 // AK092383 // AK074321 // AK027264 // ENST00000358280 // AK074569 // BX647682 // ENST00000493010 // ENST000…	FOXP1	forkhead box P1	27086
16964549	0.0437365	0.927223	0.0640017	0.882492	-0.0397005	0.814552	-0.0194353	0.946607	-1.02583	3.0987e-09	0.000687506	0.999754	-0.448645	0.000456946	0.577874	7.93611e-06	0.631471	8.60349e-06	0.222526	0.236553		10.169	10.0025	9.62043	10.0573	9.97385	9.90483	6.29462	6.54185	6.48941	5.89448	6.81041	6.82187	7.39089	7.36692	7.40338	6.92138	7.41759	7.38607	6.04442	6.28539	6.13673	5.94696	5.66939	5.97104	NM_207390 // ENST00000397439 // BC140848 // ENST00000417570 // ENST00000339847	CLEC17A	C-type lectin domain family 17, member A	388512
16891533	0.068005	0.952394	0.037835	0.978	-0.334619	0.242766	-0.364789	0.280942	-1.02524	7.368e-05	-0.340632	0.464206	-0.859061	0.00158739	-0.174453	0.535795	0.416102	0.187129	-0.108339	0.922144		8.08521	8.05676	8.15397	8.37649	8.41138	8.28818	9.17978	9.31382	9.17217	7.26389	7.37128	7.24093	9.01264	9.28123	9.02575	8.69735	9.36035	9.01149	9.59295	9.71186	9.59029	8.30694	8.35096	8.17183	AK054990	LOC100216479	hypothetical LOC100216479	100216479
16937329	0.0337983	0.947798	0.00186357	0.997537	0.248843	0.0461636	0.216908	0.116074	-1.02503	2.77823e-09	-0.550768	0.000105091	0.319226	0.010447	0.79349	1.02489e-07	0.0509606	0.854147	0.121344	0.685202		7.50595	7.22294	7.2081	7.5925	7.40616	7.45104	4.99754	5.47389	5.48354	6.33437	6.35298	6.10796	6.89226	6.89879	6.92835	6.45801	6.79489	6.85817	7.72367	7.85417	7.59265	8.16298	8.52644	8.46264	NM_005795 // ENST00000409998 // ENST00000392370 // ENST00000410068 // L76380 // U17473 // AK292998 // AK291630 // AY389506 // ENST00000447403 // ENST00000410102 // ENST00000298708 // ENST00000474212 // ENST00000461244 // ENST00000485973 // ENST00000479784 // ENST00000436409 // DQ280491	CALCRL	calcitonin receptor-like	10203
16771624	0.126457	0.783863	-0.088772	0.859704	0.120163	0.473727	-0.0950659	0.710184	-1.02349	3.24806e-08	-0.134013	0.670339	0.485278	0.00109648	1.37475	4.59444e-10	0.118011	0.630891	0.483126	0.00416279		7.65164	7.66913	7.70517	7.69987	7.74059	7.62128	7.70726	7.77238	7.7754	9.10587	9.27472	9.24058	8.38816	8.21896	8.28684	8.19622	8.41121	8.14096	8.69982	8.64234	8.42595	8.98697	8.89764	8.70084	NM_001042496 // NM_133647 // NM_001042494 // NM_001042495 // NM_001042497 // NM_005135 // ENST00000354181 // ENST00000458406 // ENST00000397702 // ENST00000451844 // ENST00000397707 // ENST00000290209 // DQ138323	SLC12A6	solute carrier family 12 (potassium/chloride transporters), member 6	9990
16815355	0.0444987	0.941851	-0.0480369	0.938502	-0.268978	0.0832148	-0.361513	0.0216504	-1.02333	5.32868e-08	-0.0953033	0.817858	-0.720129	1.88616e-05	0.207899	0.134021	0.443231	0.00373073	-0.00792115	0.994907		9.54432	9.52852	9.53794	9.56433	9.50589	9.68533	9.56342	9.58371	9.58113	8.68907	8.54604	8.57624	9.6564	9.69728	9.62097	9.58206	9.60166	9.67753	9.63584	9.58105	9.57502	9.62076	9.47863	9.50467	NM_032346 // ENST00000246535 // BC006146	PDCD2L	programmed cell death 2-like	84306
16747623	0.034836	0.944075	0.0588395	0.890353	0.152026	0.240877	0.176029	0.235386	-1.01971	2.51802e-09	-1.08806	1.24757e-08	-0.462371	0.000258735	-0.530719	1.74201e-05	0.281616	0.0239223	-0.33278	0.0223446		6.39179	6.39158	6.41555	6.43445	6.2157	6.27312	6.40428	5.95412	6.08741	7.70886	8.01446	7.87713	6.78373	6.91311	7.06032	6.72652	6.6984	6.86944	6.77174	6.64199	6.7435	6.81436	6.70931	6.69125	NM_031498 // ENST00000300406 // ENST00000515635 // ENST00000511673 // ENST00000511277 // ENST00000507680 // BC008663	GNGT2	guanine nucleotide binding protein (G protein), gamma transducing activity polypeptide 2	2793
16650213	-1.31472	0.676416	0.606951	0.863041	-0.991364	0.377766	0.930303	0.537808	-1.01815	0.283524	0.620644	0.823848	-0.768594	0.633047	0.870197	0.389104	-0.1219	0.966708	0.10087	0.988416		7.99728	7.92847	7.94865	8.04703	7.96692	7.97538	8.73737	8.80807	8.78404	7.76992	7.37284	7.52019	8.10964	8.17073	8.07152	8.07306	8.08	8.1014	8.21057	8.30727	8.34731	7.44687	7.47422	7.42649	NM_022748 // ENST00000311160 // ENST00000398879 // AF417489 // ENST00000355730 // ENST00000442536 // ENST00000458317 // ENST00000415929 // ENST00000413551 // ENST00000469470	TNS3	tensin 3	64759
16896955	0.151774	0.753427	0.0830597	0.878747	0.00562727	0.983556	-0.0630874	0.845097	-1.01814	9.32871e-08	-0.0336261	0.955517	-1.58318	4.65999e-10	-0.598667	8.55146e-05	0.970426	6.43992e-07	-0.618383	0.000675182		8.53922	8.46539	8.64915	8.77224	8.64792	8.65296	8.57299	8.70912	8.68955	10.2035	10.1871	10.4222	8.70709	9.0021	8.7595	8.79293	8.73356	8.82539	8.74172	8.76904	8.66776	9.0969	8.88952	8.68029	NM_014726 // ENST00000361722 // BC152407	TBKBP1	TBK1 binding protein 1	9755
17101815	0.0722544	0.797016	0.00256619	0.995867	0.187568	0.0344624	0.11788	0.288832	-1.01695	2.82712e-11	-0.292323	0.00269028	0.203962	0.0240106	0.928586	8.45995e-11	-0.0719756	0.622545	-0.0555819	0.850259		9.55474	9.58662	9.57273	9.58475	9.66578	9.67568	8.63023	8.87213	8.78187	8.93289	8.89481	8.90482	9.83035	9.75403	9.75035	9.80478	9.83216	9.71094	9.86524	9.86571	9.78186	9.78245	9.67508	9.72602	NM_000292 // ENST00000379942 // BC014036 // ENST00000473739 // ENST00000469645 // ENST00000481718 // ENST00000469485 // ENST00000473597 // ENST00000464455	PHKA2	phosphorylase kinase, alpha 2 (liver)	5256
16657207	-0.343981	0.886906	-0.258777	0.919482	0.0746909	0.943707	0.159895	0.916096	-1.01575	0.0827039	0.580084	0.693245	-0.792655	0.364385	0.803181	0.193763	-0.0204564	0.99313	-0.887802	0.482132		6.60957	6.06049	6.46994	7.07462	6.18817	6.2252	7.13869	7.21624	7.07201	9.95781	10.4285	10.2572	6.95423	6.79326	7.15529	6.53767	6.71836	6.69925	8.48639	8.29588	8.23907	10.0146	9.92365	9.99815
16654303	-0.0769234	0.971627	-0.0683691	0.977236	-0.201209	0.745459	-0.192655	0.843389	-1.01541	0.0146628	-0.14083	0.932906	0.109289	0.920867	0.983869	0.0192263	-0.184628	0.865242	0.125871	0.951118		10.2614	10.2968	10.2956	10.2784	10.3993	10.3002	10.2796	10.4128	10.3076	11.2934	11.2521	11.2473	10.4056	10.4181	10.2308	10.161	10.3384	10.2541	10.1615	10.2123	10.2038	10.2497	10.2646	10.2559	NM_017580 // ENST00000359653 // AK302810 // ENST00000471421	ZRANB1	zinc finger, RAN-binding domain containing 1	54764
16966712	-0.0173767	0.980818	-0.10443	0.836765	0.0639437	0.742261	-0.0231093	0.947536	-1.0152	5.02123e-08	-0.0606966	0.901218	0.0209166	0.954557	0.975422	9.05469e-08	-0.0564092	0.868824	-0.0994363	0.839859		9.02134	9.15894	9.02246	9.3717	9.32241	9.51064	10.4571	10.4572	10.5103	10.8429	10.704	10.8675	9.80987	9.80444	9.90809	10.1584	9.86843	9.83822	10.5986	10.4191	10.4966	9.51592	9.43517	9.34428	NR_003187 // M55067 // AK298739	NCF1C // NCF1	neutrophil cytosolic factor 1C pseudogene // neutrophil cytosolic factor 1	654817 // 653361
16936044	0.11097	0.875924	0.0578919	0.944998	-0.0426224	0.884851	-0.0957008	0.806383	-1.01446	2.45578e-06	0.301231	0.330555	-0.30544	0.19681	1.01025	2.8502e-06	0.269199	0.286338	0.00638139	0.997027		8.47998	8.3449	8.42423	8.5914	8.51073	8.59559	8.43175	8.37994	8.40912	7.2682	7.28363	7.057	8.52351	8.471	8.52801	8.38813	8.47064	8.4975	8.45537	8.66498	8.7058	8.34643	8.22775	8.21353	NM_003394 // ENST00000301061 // U81787 // BC096353 // BC096354 // BC096356 // AB070724 // BC096355 // ENST00000416545 // ENST00000426009 // ENST00000359937 // ENST00000420388 // ENST00000475740 // ENST00000403957 // ENST00000407467 // ENST00000413630	WNT10B	wingless-type MMTV integration site family, member 10B	7480
16944738	0.188072	0.829947	0.0108284	0.99469	-2.35152	3.45875e-09	-2.52876	1.3605e-09	-1.01355	5.73442e-05	0.00201079	0.999607	-2.33047	2.40461e-09	-1.31491	2.66128e-06	0.123521	0.825582	0.14457	0.877266		5.47823	5.23385	5.31794	5.60618	5.39289	5.33462	5.46781	5.47263	5.28506	7.58056	8.40891	8.51785	5.20392	5.38563	5.30437	5.34594	5.24331	5.50599	5.44489	5.42088	5.28721	5.56152	5.44399	5.24292	NM_018643 // ENST00000244709 // AF287008 // ENST00000334475	TREM1	triggering receptor expressed on myeloid cells 1	54210
16660199	-0.014462	0.985235	-0.0547484	0.930968	0.0479808	0.823119	0.00769435	0.984756	-1.0133	9.52693e-08	-0.126742	0.729686	-0.0810447	0.776922	0.805515	2.23422e-06	0.0290076	0.946253	-0.100018	0.848745		9.82969	9.96164	9.8115	9.89405	9.9518	9.84478	10.0123	10.0678	9.89577	8.77985	8.73953	8.78153	9.72352	9.9172	9.75937	9.68894	9.73065	9.80631	9.68376	9.85807	9.76487	9.46381	9.33706	9.57629	NM_021830 // NM_001163812 // NM_001163813 // NM_001163814 // ENST00000311916 // ENST00000370228 // AF292004 // ENST00000473656 // ENST00000476766 // ENST00000459764	C10orf2	chromosome 10 open reading frame 2	56652
16654553	0.10477	0.952587	-0.231508	0.872313	0.119987	0.835103	-0.216291	0.782857	-1.01327	0.00560505	-0.451814	0.575363	0.306205	0.648659	0.867661	0.0180564	-0.062678	0.955979	0.12354	0.945537		10.2159	10.0464	10.1557	10.3276	10.0381	10.1124	10.6669	10.7833	10.7603	10.4289	10.2819	10.2794	9.19	8.78733	8.96736	8.90293	9.12027	9.05505	8.91837	9.05096	8.82442	9.19578	9.0506	9.31361	NM_152520 // NM_001113397 // NM_001113398 // ENST00000410066 // ENST00000409343 // ENST00000409084 // ENST00000336917 // ENST00000409692 // ENST00000452784 // BC092423 // BC048123 // BC038422 // AK131432 // ENST00000392418 // ENST00000453550 // ENST00000457304 // ENST00000451732 // ENST00000438871 // ENST00000466398 // ENST00000469551 // ENST00000463918	ZNF385B	zinc finger protein 385B	151126
16871290	0.00430588	0.993913	-0.101052	0.820833	0.00314419	0.989102	-0.102214	0.645206	-1.01311	1.2602e-08	-0.458169	0.00234726	-0.313779	0.0247675	0.24116	0.0450885	0.0351731	0.918403	-0.28175	0.128041		8.90016	8.86398	8.82904	8.88527	8.93962	8.89968	8.52003	8.66513	8.56943	8.14245	8.06716	8.1563	8.60689	8.61275	8.66822	8.54424	8.5845	8.61981	8.80678	8.77185	8.87529	8.94835	9.00029	9.01417	NM_001040214 // NM_153355 // ENST00000368417 // BC035062 // ENST00000368416 // ENST00000476571	NKAIN2	Na+/K+ transporting ATPase interacting 2	154215
16781177	0.144498	0.81613	0.120332	0.855616	0.264096	0.183406	0.23993	0.329817	-1.01291	1.20664e-06	-0.373826	0.125616	0.345379	0.0982231	0.984464	1.94875e-06	0.107439	0.775031	0.188722	0.682036		9.26955	9.32157	9.54725	9.5491	9.6035	9.71258	9.00014	9.15064	9.2529	10.0793	9.80606	9.84617	9.04624	8.91237	8.85102	9.09141	8.8889	8.7668	7.3369	7.86008	7.90899	6.74625	7.51212	7.31206
16708533	0.0282386	0.963801	-0.0314772	0.961601	0.107861	0.531217	0.0481457	0.881586	-1.01143	4.26727e-08	-0.195678	0.432676	-0.0338573	0.920676	0.781891	1.49273e-06	0.0643663	0.84487	-0.0773525	0.887325		5.77207	5.83659	5.65762	5.79843	5.58706	5.62898	8.08051	8.04439	8.09229	7.74391	7.9368	7.7684	8.29593	8.64033	8.62784	8.16003	8.39827	8.57347	6.8664	7.34832	7.37758	6.99181	7.49528	7.61977
16733473	0.00614456	0.991444	0.0979805	0.79601	0.117543	0.365231	0.209379	0.110405	-1.01103	1.75104e-09	-0.262827	0.0623652	0.0575661	0.792047	0.805766	4.32621e-08	0.305937	0.00998602	0.24596	0.123525		7.39024	7.59685	7.57084	7.53304	7.46646	7.4856	6.78006	6.61456	6.68149	8.36529	8.50799	8.89956	6.87804	6.97364	6.78709	6.93803	6.73061	6.89574	6.66317	6.72134	6.88004	6.9557	6.6458	6.95304	NM_021006 // NM_001001437 // BC107710 // BC007783 // ENST00000378354 // ENST00000425833 // ENST00000492788 // ENST00000498676 // ENST00000422211 // ENST00000394486 // ENST00000394484 // ENST00000438338	CCL3L1 // CCL3L3	chemokine (C-C motif) ligand 3-like 1 // chemokine (C-C motif) ligand 3-like 3	6349 // 414062
16991991	0.0558613	0.904331	0.0149651	0.980554	0.218403	0.0838546	0.177507	0.240218	-1.00969	3.50525e-09	-0.0553103	0.88759	0.0428959	0.866494	0.997276	4.13993e-09	0.188965	0.195665	0.0134582	0.986996		10.6076	10.5722	10.649	10.657	10.612	10.7219	10.4464	10.7011	10.5634	9.77184	9.58029	9.55469	10.8622	10.6402	10.6327	10.7338	10.6214	10.6661	10.7548	10.7347	10.5785	10.9898	10.8833	10.9664	NM_005080 // NM_001079539 // ENST00000216037 // ENST00000344347 // BC000938 // ENST00000415306 // ENST00000484256 // ENST00000482720	XBP1	X-box binding protein 1	7494
17118724	-0.164265	0.863286	0.000877384	0.999127	-0.149937	0.644881	0.0152053	0.981606	-1.00533	7.13782e-05	-0.246363	0.656986	0.0698137	0.905257	0.828776	0.000610595	-0.167326	0.735622	0.0524243	0.968994		9.11725	9.09079	9.24599	9.32577	9.27836	9.33161	9.30356	9.31346	9.14855	8.71253	8.74941	8.62812	9.631	9.48668	9.44484	9.54958	9.4972	9.5778	9.76668	9.62495	9.6418	9.90816	9.80095	9.7529	NM_004577 // ENST00000395471 // ENST00000275605 // ENST00000437355 // BX537439 // BC063614 // ENST00000427797 // ENST00000421626 // ENST00000419984 // ENST00000421312 // ENST00000424596 // BC052958 // ENST00000459834 // ENST00000416592 // ENST00000413218 // ENST00000472276	PSPH	phosphoserine phosphatase	5723
16822014	0.171195	0.697929	0.0561501	0.921274	0.286656	0.0557584	0.171612	0.388086	-1.00474	4.6687e-08	-0.181141	0.489152	0.28173	0.0778266	1.10533	1.22526e-08	0.0879939	0.75985	0.0830678	0.87577		5.02723	5.1999	4.83769	4.8327	4.70337	4.96282	5.0972	5.02009	5.16087	6.32557	6.41538	6.66211	5.66613	5.87946	5.5966	5.47715	5.32015	5.79335	7.71421	7.98084	7.517	8.01431	8.55851	8.40033	NM_017935 // NM_001083907 // NM_001127507 // ENST00000322953 // ENST00000444316 // ENST00000428908 // ENST00000508653 // ENST00000504592 // AK091523 // ENST00000504403 // ENST00000510950	BANK1	B-cell scaffold protein with ankyrin repeats 1	55024
17016956	0.149171	0.732178	-0.0274189	0.966534	-0.228537	0.126984	-0.405127	0.00644415	-1.00317	3.83765e-08	-0.282865	0.13114	-0.142851	0.491477	0.577455	5.14663e-05	-0.104299	0.685245	-0.0186136	0.982395		5.54251	5.09608	5.29755	5.44995	5.61898	5.4693	4.72129	4.84679	4.46366	7.53422	7.472	7.49588	6.2555	5.42563	5.73089	5.98494	5.59375	5.3522	4.92216	5.046	5.03757	4.89374	4.70265	4.84327
17026696	0.149171	0.732178	-0.0274189	0.966534	-0.228537	0.126984	-0.405127	0.00644415	-1.00317	3.83765e-08	-0.282865	0.13114	-0.142851	0.491477	0.577455	5.14663e-05	-0.104299	0.685245	-0.0186136	0.982395		9.36121	8.52499	8.74117	9.50798	8.89577	9.01808	9.99442	9.79431	9.72869	9.50292	9.26796	8.84094	7.04034	6.85041	6.93069	6.95059	6.94366	7.05742	6.38847	6.07572	5.59204	6.72439	6.79811	6.39092	NM_025113 // ENST00000429979 // ENST00000389908 // BC043488 // AK293034 // AK300183 // ENST00000378797 // ENST00000378781 // ENST00000441284 // ENST00000378787 // AK093073 // ENST00000322896 // BC032311 // ENST00000378784 // AK125950 // BX641126 // ENST00000439642 // ENST00000487195 // ENST00000409879 // AK310264	C13orf18	chromosome 13 open reading frame 18	80183
17028847	0.149171	0.732178	-0.0274189	0.966534	-0.228537	0.126984	-0.405127	0.00644415	-1.00317	3.83765e-08	-0.282865	0.13114	-0.142851	0.491477	0.577455	5.14663e-05	-0.104299	0.685245	-0.0186136	0.982395		8.78959	8.62668	8.66183	8.81906	8.72847	8.71774	9.00628	9.01758	9.07962	8.51097	8.63475	8.64245	8.4124	8.3824	8.5153	8.35688	8.37573	8.39078	7.69833	7.87391	7.89197	7.6798	7.88922	7.80068	NM_000616 // NM_001195014 // NM_001195015 // NM_001195016 // NM_001195017 // NR_036545 // ENST00000011653 // BC025782 // ENST00000437800	CD4	CD4 molecule	920
17031625	0.149171	0.732178	-0.0274189	0.966534	-0.228537	0.126984	-0.405127	0.00644415	-1.00317	3.83765e-08	-0.282865	0.13114	-0.142851	0.491477	0.577455	5.14663e-05	-0.104299	0.685245	-0.0186136	0.982395		9.23091	9.29797	9.28743	9.50173	9.42981	9.4346	9.32548	9.39773	9.41493	8.45257	8.23776	8.16976	9.39763	9.41553	9.23572	9.23536	9.24604	9.32187	9.30679	9.34334	9.34004	9.0393	9.02242	9.02786	NM_001361 // ENST00000219240 // BC065245 // ENST00000378782	DHODH	dihydroorotate dehydrogenase	1723
17034080	0.149171	0.732178	-0.0274189	0.966534	-0.228537	0.126984	-0.405127	0.00644415	-1.00317	3.83765e-08	-0.282865	0.13114	-0.142851	0.491477	0.577455	5.14663e-05	-0.104299	0.685245	-0.0186136	0.982395		11.3009	11.2445	11.294	11.4095	11.3436	11.4516	11.2125	11.0974	11.1716	10.2068	9.96785	10.1768	11.1872	11.2948	11.2275	11.1985	11.2143	11.3048	11.2347	11.1404	11.1826	11.0604	11.011	11.0814	NM_020158 // ENST00000221233 // AF285785	EXOSC5	exosome component 5	56915
17036347	0.149171	0.732178	-0.0274189	0.966534	-0.228537	0.126984	-0.405127	0.00644415	-1.00317	3.83765e-08	-0.282865	0.13114	-0.142851	0.491477	0.577455	5.14663e-05	-0.104299	0.685245	-0.0186136	0.982395		5.59636	5.8181	5.53545	5.50162	5.64444	5.93588	7.59417	7.79148	7.52739	7.37073	7.28801	7.17994	7.09353	7.08692	6.90946	6.80012	6.88715	6.993	7.32232	7.02727	6.97588	7.14552	7.13039	7.12879
17039123	0.149171	0.732178	-0.0274189	0.966534	-0.228537	0.126984	-0.405127	0.00644415	-1.00317	3.83765e-08	-0.282865	0.13114	-0.142851	0.491477	0.577455	5.14663e-05	-0.104299	0.685245	-0.0186136	0.982395		10.8868	10.8949	10.9026	10.9616	10.9554	10.9271	10.8846	10.8453	10.8525	9.87123	9.55145	9.66386	10.8178	11.0416	10.9918	10.8247	10.9207	10.9615	10.8279	10.8653	10.8222	10.5987	10.5779	10.6606	NM_006784 // ENST00000349139 // AF083217 // ENST00000487202 // ENST00000471680	WDR3	WD repeat domain 3	10885
17121292	-0.00152277	0.998322	0.0552404	0.924331	-0.132091	0.436781	-0.0753274	0.792498	-1.00301	6.01073e-08	-0.242313	0.271334	-0.0641432	0.827094	0.696554	8.13504e-06	0.157379	0.471397	0.225327	0.379299		9.81937	10.1197	9.83534	9.81114	9.88383	9.84597	10.1407	10.2203	10.0793	8.60132	8.67517	8.63672	9.69418	9.94974	9.77504	9.53223	9.76854	9.87802	9.79091	9.92664	9.83095	9.6882	9.55813	9.52889	NM_001174166 // NM_004694 // ENST00000327268 // BC064832 // ENST00000344066	SLC16A6	solute carrier family 16, member 6 (monocarboxylic acid transporter 7)	9120
17118828	-0.15507	0.882042	-0.171165	0.864752	-0.321103	0.306882	-0.337198	0.386959	-1.00268	0.000211563	-0.338959	0.525953	0.185285	0.704839	0.849001	0.00123245	-0.456817	0.176403	0.0495704	0.973985		4.26329	4.4558	4.21812	4.64249	4.21545	4.18901	4.61561	4.33613	3.79817	7.52567	8.55101	8.88043	4.55522	4.50446	4.40028	4.53584	4.4399	4.25126	4.62167	4.34946	4.20425	4.43891	4.67085	4.70623
16657209	-0.362306	0.723463	-0.0474346	0.97769	-0.182	0.662023	0.132871	0.846916	-1.00267	0.000894617	-0.285082	0.707053	-0.11738	0.864809	0.60021	0.0426293	-0.162889	0.819259	-0.0982686	0.945564		8.07145	7.75605	8.02644	7.9538	7.97769	7.92821	8.41726	8.418	8.45276	7.09937	7.17948	7.1705	8.07315	8.05782	8.17464	8.2227	8.24131	8.17509	8.40028	8.35688	8.33325	7.90316	7.70543	7.58986	NM_022367 // NM_001193300 // NM_001193301 // NM_001193302 // ENST00000368282 // ENST00000355014 // ENST00000368285 // BC020974 // AY358531 // AB029394 // AK290353 // AK296693 // ENST00000368284 // ENST00000368286 // ENST00000368283 // AK022416 // ENST00000435124 // ENST00000414683 // ENST00000438830 // ENST00000487358 // ENST00000470306 // ENST00000462892	SEMA4A	sema domain, immunoglobulin domain (Ig), transmembrane domain (TM) and short cytoplasmic domain, (semaphorin) 4A	64218
16721861	-0.0533474	0.846666	-0.0308373	0.920344	-0.14914	0.0660008	-0.12663	0.174145	-1.00225	8.06636e-12	-0.025731	0.926499	-0.0206294	0.907821	0.955889	1.36138e-11	-0.183756	0.0245473	-0.055246	0.830203		6.31496	6.14872	6.17933	5.92362	6.33713	6.01676	6.74864	6.49199	6.66503	6.38756	6.30547	6.01376	8.30927	8.35253	8.36279	7.92025	8.05348	8.39358	8.62259	8.75668	8.73986	8.10031	8.31702	8.36432	NM_017763 // ENST00000407977 // AK291027	RNF43	ring finger protein 43	54894
16745281	0.0882095	0.786594	-0.0457622	0.901365	-0.179984	0.0876429	-0.313956	0.00298557	-1.00209	3.02734e-10	-0.212928	0.0976562	-0.325321	0.00176822	0.463846	1.18067e-05	-0.00374728	0.991245	-0.149084	0.41176		7.85702	7.76013	7.81585	8.10962	7.68525	7.78445	6.45012	6.42554	6.2474	5.15214	6.00152	5.24241	5.38453	5.7461	5.68924	5.34818	5.2953	5.83378	7.4369	7.41484	7.2718	8.27805	8.40347	8.35314
16828640	0.0489878	0.967731	-0.377783	0.671592	0.193169	0.553262	-0.233602	0.586093	-0.996944	0.000136644	-0.590512	0.0818252	0.00492253	0.995424	0.411355	0.0995386	-0.039309	0.958733	-0.227555	0.767261		5.93111	5.30134	5.71957	5.47565	5.61795	5.71426	5.42035	4.98713	5.48332	5.78224	5.48351	5.6674	7.38245	7.76928	7.58399	6.90584	7.47224	7.32886	8.94335	9.17316	8.61649	8.24184	8.91787	8.98751
17066835	0.0535159	0.889662	-0.0774992	0.822293	0.178229	0.0982838	0.0472138	0.821111	-0.996711	4.37568e-10	-0.258866	0.0324668	-0.118273	0.406095	0.619572	3.42008e-07	0.271936	0.0104327	-0.0245662	0.959307		8.95899	9.01378	8.77524	8.89959	8.68917	8.75157	8.42672	8.56605	8.44858	9.66568	9.78704	9.6796	9.46686	9.61363	9.58659	9.3441	9.52623	9.42061	9.16339	9.02285	9.07413	9.60267	9.60561	9.57298	NM_001145160 // NM_003290 // ENST00000344824 // ENST00000300933 // BC037576 // ENST00000403340	TPM4	tropomyosin 4	7171
17119064	-0.123326	0.85684	-0.0197906	0.984458	-0.187739	0.379006	-0.0842041	0.826215	-0.996229	1.80988e-06	-0.216075	0.552209	-0.0125606	0.980406	0.767594	5.00277e-05	-0.19583	0.492034	-0.0206509	0.987011		5.29419	5.54018	5.50664	5.06935	5.41669	5.6459	5.04753	5.12792	5.04013	7.39137	7.66813	7.49714	5.20382	5.92303	5.5257	5.44553	5.32579	5.43236	4.60951	4.98551	4.71214	4.9395	5.15624	4.83551	NM_003037 // ENST00000302035 // BC132792 // ENST00000235739 // ENST00000355199 // ENST00000392208 // ENST00000494463 // ENST00000497223	SLAMF1	signaling lymphocytic activation molecule family member 1	6504
16880057	-0.070906	0.912895	-0.0526572	0.940058	-0.215791	0.23527	-0.197542	0.392187	-0.995989	3.89373e-07	-0.107892	0.816109	-0.0738856	0.825018	0.814212	5.84064e-06	-0.117268	0.706168	0.0246376	0.980451		8.82715	8.79355	8.69472	8.95261	8.84249	8.81519	7.65141	7.86238	7.60093	8.18903	8.19708	8.04006	9.2235	9.23742	9.06568	8.95303	9.10245	9.07234	9.23578	9.04216	9.04123	9.36889	9.24285	9.28628	NM_033515 // ENST00000275189 // AY643712 // ENST00000368149 // ENST00000463225	ARHGAP18	Rho GTPase activating protein 18	93663
16705507	-0.00256133	0.995692	-0.134888	0.695519	-0.228266	0.035993	-0.360592	0.00123502	-0.995474	6.26842e-10	-0.163932	0.317682	-0.136952	0.321608	0.69459	1.01577e-07	-0.303	0.00522731	-0.211686	0.163394		11.6361	11.6645	11.6011	11.6552	11.8117	11.6795	11.5002	11.5905	11.5476	10.9265	10.831	10.7458	11.9071	11.7607	11.8794	11.8263	11.9128	11.9446	11.9921	11.9512	11.9898	11.8095	11.7967	11.8612	NM_000902 // NM_007289 // NM_007287 // NM_007288 // ENST00000460393 // ENST00000462745 // ENST00000492661 // ENST00000493237 // ENST00000404362 // ENST00000360490 // BX647134 // ENST00000481828 // ENST00000462837 // ENST00000491026 // ENST00000491597 // ENST00000495577 // ENST00000493888	MME	membrane metallo-endopeptidase	4311
16752185	-0.12361	0.75538	-0.0462236	0.927731	1.59549	3.56167e-11	1.67288	2.16149e-11	-0.995238	8.19068e-09	-0.460141	0.00146724	0.370343	0.00449201	0.905441	3.25625e-08	1.11133	6.26107e-09	-0.11382	0.738832		3.89992	4.02696	4.2047	3.89371	4.17871	4.24935	4.05446	4.38361	4.06677	6.65645	7.54131	7.48475	3.75962	4.19225	4.46857	3.85577	4.10083	4.29805	3.78346	3.94986	3.95091	4.05386	4.06339	3.92666	NM_003007 // ENST00000372781 // ENST00000405932 // BC007096 // ENST00000445493 // ENST00000244069	SEMG1	semenogelin I	6406
16670169	0.27959	0.549859	-0.0784784	0.872313	0.073503	0.67828	-0.284565	0.0605576	-0.994535	3.01237e-08	-0.0914701	0.809721	0.32472	0.0259983	1.22779	1.4497e-09	-0.152379	0.450322	0.0988388	0.828076		9.79995	9.94412	9.63601	9.72946	9.82789	9.80017	9.75548	10.0197	9.84754	8.00686	8.44982	8.26683	9.8763	9.94201	9.83033	9.81146	9.87	9.8614	9.80249	10.0687	9.85689	9.56739	9.52567	9.57023	NM_003844 // ENST00000221132 // BC012866 // ENST00000519862	TNFRSF10A	tumor necrosis factor receptor superfamily, member 10a	8797
16889016	0.135205	0.882211	-0.201041	0.803962	1.417	2.59488e-06	1.08075	8.5472e-05	-0.994052	5.30582e-05	-0.115631	0.884132	2.03786	1.21727e-08	2.91628	2.31364e-11	-0.490868	0.0702055	0.129989	0.889417		6.37824	6.14427	6.76486	6.81337	6.30028	6.65252	4.0714	3.71068	3.83751	3.87183	4.17677	4.04955	5.06203	5.02102	5.15087	4.75447	4.97558	4.82266	5.56177	5.84811	5.59705	5.28271	5.48177	5.43212
16839642	-0.0409193	0.933334	0.0149766	0.980554	-0.00655044	0.974824	0.0493455	0.843857	-0.993133	3.9115e-09	-0.205796	0.237575	0.0735967	0.727346	0.860934	3.05852e-08	-0.106289	0.590475	-0.0261417	0.965832		4.90105	5.26717	4.929	4.89451	4.60923	4.66352	5.603	5.87996	5.77984	6.14688	6.02839	6.1074	6.91114	6.76486	6.63429	6.70046	6.76329	6.73713	6.42531	6.67164	6.45046	6.65748	6.61209	6.35718	NM_020843 // NM_001145923 // ENST00000324767 // AF242528 // ENST00000303521	SCAPER	S-phase cyclin A-associated protein in the ER	49855
16878137	0.126807	0.711292	0.089175	0.806024	0.0879136	0.500887	0.0502821	0.824416	-0.992535	1.33238e-09	-0.23756	0.0908716	-0.0590017	0.773702	0.695974	1.93912e-07	0.161123	0.24465	0.0142075	0.983129		11.0193	11.1537	11.0277	11.0418	11.1145	11.0771	10.9143	10.9488	10.9799	10.6634	10.8516	10.8351	9.4538	9.67627	9.70869	9.42863	9.66622	9.64604	10.0858	10.2893	10.2434	9.78711	9.94487	9.92997	NM_001005273 // NM_005852 // NM_001005271 // U91543 // ENST00000358181 // ENST00000330494 // ENST00000403047 // ENST00000412940 // ENST00000470531 // ENST00000466233	CHD3	chromodomain helicase DNA binding protein 3	1107
16818773	0.0749145	0.875396	0.0175891	0.978991	-0.0410676	0.820316	-0.098393	0.651934	-0.992356	1.19288e-08	-0.356953	0.0171431	0.0647837	0.792416	0.700187	1.52257e-06	-0.0749335	0.775488	0.0309178	0.959308		8.84801	8.67378	8.48828	9.0985	9.03385	8.91904	7.80263	8.07617	8.2423	7.88778	7.7331	7.70581	7.25188	7.05863	6.8774	7.00533	7.10225	6.94792	6.60952	6.56384	6.67691	6.46175	6.47707	6.61817	NM_001153 // ENST00000394295 // D78152 // ENST00000477632 // ENST00000487351 // ENST00000460439 // ENST00000460942 // ENST00000471395	ANXA4	annexin A4	307
16654615	0.218862	0.932546	-0.367368	0.87155	0.246294	0.773919	-0.339936	0.781563	-0.992267	0.0847131	0.00346205	0.999754	-0.0410384	0.981138	0.954691	0.105485	0.445658	0.707532	0.158326	0.956461		9.8177	9.81717	9.76405	9.87889	9.91318	9.89884	9.94045	10.2146	10.174	8.90826	9.04257	8.93398	10.0417	10.0547	10.0206	9.84965	10.0676	10.0898	10.0142	10.0456	10.0635	9.6726	9.67149	9.72174	NM_005845 // NM_001105515 // ENST00000376887 // ENST00000431522 // AY207008 // ENST00000412704 // ENST00000471041	ABCC4	ATP-binding cassette, sub-family C (CFTR/MRP), member 4	10257
16879921	0.621661	0.625706	0.220279	0.870981	0.444025	0.291464	0.0426427	0.964336	-0.990837	0.00383909	-0.179285	0.883367	-0.0776674	0.933895	0.733885	0.0325966	0.614342	0.175995	0.0926489	0.957765		10.0323	9.96188	9.93237	10.0411	10.1058	10.0992	9.96765	10.0518	9.96218	9.4555	9.5566	9.35806	10.2337	10.2349	10.1752	10.2594	10.2153	10.2257	10.3266	10.3058	10.2754	10.4148	10.4252	10.2995	NM_144563 // ENST00000283646 // BC015529	RPIA	ribose 5-phosphate isomerase A	22934
16753465	0.0338537	0.93668	-0.0351667	0.93446	0.309097	0.00396457	0.240077	0.0313345	-0.990253	5.90324e-10	-0.100289	0.655134	0.243137	0.0271541	1.1331	7.70476e-11	0.187746	0.112217	0.121786	0.593687		11.2091	11.136	11.0514	11.2539	11.2607	11.1447	10.9975	11.0769	11.0281	11.5019	11.4834	11.3967	11.1819	11.0016	11.0153	11.1298	11.0754	11.037	10.944	10.97	10.8266	10.408	10.4649	10.3203	NM_130446 // ENST00000341319 // BC032348 // ENST00000468734 // ENST00000489245 // ENST00000487643	KLHL6	kelch-like 6 (Drosophila)	89857
16821737	0.274285	0.664526	-0.166479	0.799877	0.268574	0.209739	-0.17219	0.583622	-0.989487	3.90323e-06	-0.302039	0.336902	0.0194395	0.970142	0.706888	0.000222146	0.44715	0.0330766	0.198016	0.68921		9.89227	9.72311	9.71354	9.84635	9.59658	9.60368	7.80829	7.86126	8.0445	9.61542	9.30394	9.44327	8.4417	8.25621	8.09188	8.26236	8.05028	8.14001	7.61637	7.72524	7.60259	8.993	8.75707	8.71643	NM_005041 // NM_001083116 // ENST00000441259 // ENST00000318971 // ENST00000373209 // BC063043 // ENST00000473106	PRF1	perforin 1 (pore forming protein)	5551
16964523	-0.169139	0.883894	0.182264	0.869789	-0.399325	0.240088	-0.0479215	0.949265	-0.98923	0.000647078	0.100169	0.928061	-0.659088	0.0505671	0.43031	0.140913	0.369934	0.398063	0.11017	0.935243		7.9306	7.93502	7.93488	7.96593	8.12376	8.14507	8.13057	8.32018	8.32505	9.44933	9.41514	9.41686	8.53575	8.41875	8.36234	8.48294	8.34302	8.36096	8.52446	8.48422	8.35558	8.7847	8.70225	8.6203	NM_006336 // ENST00000291900 // BC052563 // ENST00000427848 // ENST00000414921 // ENST00000494461	ZER1	zer-1 homolog (C. elegans)	10444
16872430	0.100931	0.838282	-0.0408906	0.945464	0.241637	0.103283	0.0998151	0.68323	-0.986048	4.512e-08	-0.393228	0.0158448	-0.173758	0.3604	0.419061	0.00136406	0.593878	0.000111745	0.178483	0.545344		8.11141	8.20926	8.02923	8.35611	8.19611	8.373	9.26945	9.31586	9.29365	7.9733	7.90549	7.84037	9.19191	8.99387	9.13086	9.15643	9.02921	9.04825	9.41815	9.30914	9.1495	9.09685	8.81723	8.8357	NM_024701 // NR_024581 // ENST00000357700 // BC012056 // ENST00000459912 // ENST00000479033 // ENST00000466389 // ENST00000482921 // ENST00000485783 // ENST00000493897	ASB13	ankyrin repeat and SOCS box-containing 13	79754
16971488	0.158584	0.892815	-0.0667811	0.962719	-0.156949	0.698742	-0.382313	0.367705	-0.983147	0.000696047	0.137964	0.894016	-0.465692	0.22675	0.65542	0.0197488	0.00345451	0.997828	-0.305289	0.701545		8.56089	8.52281	8.45528	8.67975	8.46059	8.63262	8.73345	8.79584	8.83823	7.78176	7.6628	7.82633	8.61807	8.50873	8.61009	8.55419	8.51465	8.6238	8.59518	8.53562	8.56273	8.27708	8.28993	8.33384	ENST00000253680 // AK300027 // AK298682 // ENST00000397372 // AK131222 // AK025165	HSH2D // RAB8A	hematopoietic SH2 domain containing // RAB8A, member RAS oncogene family	84941 // 4218
16656571	-0.108752	0.934767	0.0090339	0.996092	-0.0711862	0.882884	0.0465997	0.952322	-0.982121	0.000965981	-0.144218	0.891557	-0.0958893	0.894127	0.742013	0.0107715	-0.132344	0.85945	-0.157047	0.901522		10.5348	10.4159	10.664	10.6424	10.7077	10.7786	10.2492	10.0886	10.2482	9.11354	9.12631	9.16661	10.0237	10.0814	10.0696	10.0275	10.1234	10.172	10.2216	10.1638	10.1971	10.078	10.0122	10.067	NM_030821 // ENST00000243501 // BC017218 // ENST00000507961 // ENST00000502772	PLA2G12A	phospholipase A2, group XIIA	81579
16651235	0.0840679	0.974762	-0.698886	0.701404	0.486098	0.454937	-0.296856	0.782641	-0.982074	0.0498689	-0.159366	0.936701	0.028911	0.985496	0.851619	0.0995737	0.342297	0.758586	-0.11489	0.968741		6.54527	6.4288	6.3391	6.37587	6.45308	6.20576	6.49808	6.5302	6.37251	6.86311	6.67936	6.66322	6.53668	6.19506	6.33204	6.61764	6.26232	6.74466	6.6111	6.53836	6.44548	8.6064	8.96968	8.58169	NM_145652 // ENST00000372789 // AY358822 // ENST00000307971	WFDC5	WAP four-disulfide core domain 5	149708
17126000	0.00424998	0.996647	0.035725	0.978193	0.0316269	0.937494	0.063102	0.913958	-0.982067	6.93567e-05	-0.26851	0.595061	-0.214679	0.583504	0.498878	0.0269696	0.339188	0.295329	0.092882	0.932436		6.69332	6.65335	6.76334	6.86623	6.86519	6.69274	7.10472	7.30962	7.21408	8.62266	8.577	8.32977	7.30817	7.18858	7.3358	7.34543	7.25875	7.19985	7.39338	7.31345	7.36769	7.54552	7.56713	7.41329	NM_006235 // ENST00000228217 // Z49194 // ENST00000393067	POU2AF1	POU class 2 associating factor 1	5450
16656563	-0.235296	0.875396	-0.161852	0.919706	-0.169856	0.753391	-0.0964124	0.919273	-0.981464	0.00687694	-0.0583267	0.972653	0.0766691	0.938961	0.999806	0.00651925	-0.200669	0.821023	0.0458564	0.986794		8.49791	8.47623	8.51449	8.61553	8.56726	8.57047	8.51409	8.38981	8.57349	7.53513	7.4586	7.47737	8.31356	8.32233	8.31279	8.25384	8.3187	8.23886	8.01245	8.2264	8.26258	7.96616	7.95347	7.94301	NM_006500 // ENST00000264036 // ENST00000392814 // AK128335	MCAM	melanoma cell adhesion molecule	4162
16872635	0.261147	0.658237	-0.147733	0.802271	0.629273	0.00086249	0.220393	0.366134	-0.981077	1.20652e-06	-0.889057	4.34769e-05	0.202113	0.422602	0.294133	0.0737743	0.223685	0.361417	-0.203475	0.616071		9.00346	8.80927	8.87661	9.21369	8.89287	8.86568	9.2932	9.14496	9.12348	7.8868	7.77635	7.84914	9.31713	9.47363	9.42597	9.32229	9.21334	9.37617	9.50443	9.55774	9.56808	8.40444	8.30692	8.32702	NM_000889 // ENST00000422257 // ENST00000267082 // BC015916 // ENST00000338737	ITGB7	integrin, beta 7	3695
16787972	-0.346699	0.703082	-0.087744	0.944998	0.808762	0.00782149	1.06772	0.00074869	-0.979745	0.000427772	0.0364506	0.978172	-0.152393	0.785516	0.863802	0.00160261	1.10035	0.000447109	0.139196	0.904929		9.96353	10.0796	9.84081	10.0299	9.82349	10.0557	10.2085	10.2967	10.227	8.95395	8.79612	8.9681	9.95744	10.0527	10.0089	9.98347	9.86454	10.0018	9.94207	10.108	9.86207	9.523	9.33013	9.42819	NM_145288 // ENST00000303809 // AF447583	ZNF296	zinc finger protein 296	162979
17060061	0.191825	0.723046	0.0363515	0.963477	0.785822	4.91333e-05	0.630348	0.000648586	-0.978392	7.62744e-07	-0.0840017	0.878642	0.641312	0.000432462	1.5357	1.42665e-09	0.31196	0.111051	0.167449	0.705912		9.14486	9.09666	9.07582	9.30301	9.16769	9.19041	9.19598	9.22886	9.30186	7.93401	7.92696	7.72592	9.10506	9.29221	9.25941	8.95217	9.2898	9.26769	9.19423	9.38892	9.30937	9.15028	9.24278	9.19159
16680867	-0.00236575	0.997444	-0.196119	0.733512	0.0888654	0.702701	-0.104888	0.752269	-0.977246	1.20841e-06	-0.370232	0.110709	-0.573237	0.00191826	0.0337762	0.883732	0.592538	0.00143707	-0.0695643	0.927883		11.9357	11.9114	11.908	11.9338	11.8607	11.9021	11.9315	11.9135	11.9192	11.0804	10.9094	11.047	11.8376	11.9737	11.9299	11.8368	11.8852	11.9464	11.8473	11.9658	11.9196	11.7392	11.7114	11.7783	NM_004741 // ENST00000370007 // BC001883 // ENST00000405356 // ENST00000429062 // ENST00000488254 // ENST00000464969 // ENST00000476468 // ENST00000461421 // ENST00000477977	NOLC1	nucleolar and coiled-body phosphoprotein 1	9221
16656541	-0.168197	0.885948	-0.0652311	0.964047	-0.291803	0.419365	-0.188837	0.744879	-0.97589	0.000802277	0.115696	0.917331	-0.148995	0.808017	0.942591	0.00124317	-0.30392	0.541805	-0.161112	0.894181		7.59227	7.57584	7.66814	7.66818	7.70868	7.63475	7.57529	7.80571	7.78669	8.86698	8.89744	8.8389	7.81571	7.59678	7.64877	7.62909	7.6315	7.65701	7.91167	7.98752	7.86067	8.19665	8.22977	8.0394	NM_001082968 // NM_001033551 // ENST00000379504 // ENST00000318094 // AK294846 // ENST00000395739 // ENST00000478943 // ENST00000486413	TOM1L2	target of myb1-like 2 (chicken)	146691
16705474	0.023024	0.954004	-0.0615992	0.849646	0.0890229	0.395609	0.00439972	0.985172	-0.974379	1.23882e-10	-0.0652668	0.785934	-0.0438966	0.806192	0.865215	6.34892e-10	0.0494549	0.798575	-0.0834647	0.735034		6.67578	6.69805	6.76098	6.73345	6.86592	7.06387	6.22335	6.37025	6.45466	6.22117	6.40541	6.50941	8.29248	8.257	8.21314	8.27572	8.19858	8.10685	7.57303	7.60127	7.50636	6.86627	6.67372	6.80549	NM_003033 // NM_173344 // ENST00000395320 // ENST00000319914 // ENST00000399640 // L29555 // ENST00000521180 // ENST00000522652 // ENST00000519435 // ENST00000522204 // ENST00000523634 // ENST00000518298 // ENST00000519924 // ENST00000523855 // ENST00000520020 // ENST00000522873 // ENST00000521627	ST3GAL1	ST3 beta-galactoside alpha-2,3-sialyltransferase 1	6482
17011694	-0.057954	0.892815	0.0118682	0.984761	-0.0884193	0.510914	-0.018597	0.945842	-0.974269	2.51802e-09	-0.0869994	0.757155	-0.0381769	0.875697	0.849093	1.74329e-08	-0.0921272	0.638435	-0.0418848	0.932877		10.0184	10.0399	10.0715	10.0394	10.1296	10.0571	10.321	10.239	10.3528	9.01539	8.79724	8.69731	10.1118	10.4319	10.4484	10.1583	10.4198	10.2831	10.0073	10.0018	10.0356	10.0302	9.91169	9.84842
17089877	0.06844	0.889214	0.0511456	0.920956	0.15134	0.296896	0.134045	0.487107	-0.974065	1.86797e-08	-0.243278	0.17739	-0.591097	4.66884e-05	0.13969	0.276186	0.705142	5.50789e-06	-0.0372952	0.948699		9.31148	9.29025	9.25246	9.27623	9.37512	9.39751	8.78461	8.92944	9.01266	9.66031	9.43596	9.61235	7.89816	7.79569	8.06166	7.63802	7.86656	7.90772	8.24688	8.0251	8.05204	8.05979	7.98514	8.20968
17122114	-0.110266	0.890202	-0.258194	0.709835	-0.332496	0.138345	-0.480424	0.0349339	-0.973133	1.11103e-05	-0.111483	0.863435	-0.266332	0.345876	0.595318	0.00223319	0.0117135	0.985549	0.077877	0.933431		7.99355	7.79276	7.91333	8.17948	8.10598	7.713	8.07175	7.80718	7.98855	9.54804	9.35967	8.93463	8.06337	8.157	7.89652	7.73153	8.28554	8.10813	7.56512	7.65101	7.53345	6.75241	6.86296	6.95565
16860737	0.0482564	0.892689	-0.0378031	0.918818	0.121293	0.237637	0.0352334	0.863635	-0.972307	1.88686e-10	-0.0626165	0.809152	0.0212167	0.924964	0.930908	3.14485e-10	0.0391607	0.857375	-0.0609155	0.850602		4.79925	4.27772	4.4776	4.88118	5.05796	4.26482	3.78579	3.42708	3.73999	6.88151	6.61663	6.41691	3.9007	4.29515	3.49903	3.8166	3.82939	4.28462	2.85327	3.26967	2.98964	3.10332	3.29867	2.74641
16656553	0.363719	0.723915	-0.275635	0.801249	0.229399	0.56875	-0.409955	0.360871	-0.972088	0.00135843	-0.273521	0.729686	-0.178713	0.770663	0.519854	0.0884416	0.298056	0.582506	-0.110056	0.939629		9.27007	9.1486	9.19954	9.23133	9.24507	9.17987	9.21152	9.2293	9.21625	8.27891	8.34198	8.38927	9.19686	9.16005	9.17903	9.28895	9.24995	9.15227	9.0599	9.18714	9.16526	9.19653	9.19821	9.30405	NM_172229 // NM_024507 // ENST00000303746 // ENST00000319500 // BC009383 // ENST00000435948 // ENST00000451815 // ENST00000432441	KREMEN2	kringle containing transmembrane protein 2	79412
17005797	0.0476845	0.973936	0.212045	0.846157	-0.288261	0.420043	-0.1239	0.850726	-0.971774	0.000753509	-0.699944	0.0693734	-0.792034	0.01428	-0.520204	0.067345	0.633907	0.0608	0.130134	0.920292		7.15418	6.87764	6.87764	7.34464	7.17386	6.9647	7.04203	7.06967	7.11235	8.78876	8.52113	8.60155	6.86212	7.21743	7.22016	6.89564	7.01338	7.11791	6.92297	7.24917	7.01451	6.73665	6.8468	6.7515
16919466	0.176252	0.669624	-0.0857907	0.852134	0.129965	0.375999	-0.132078	0.489157	-0.970996	1.67586e-08	-0.743553	6.44047e-06	-0.287942	0.0371621	-0.0604999	0.683479	0.438974	0.00116069	0.0210672	0.976764		7.76761	7.58848	7.73739	7.75156	7.80947	7.76179	7.75174	7.8412	7.92747	8.49731	8.27242	8.28143	7.79836	7.79157	7.90159	7.98601	7.9193	7.99868	7.51567	7.71963	7.68055	7.18564	7.03479	7.188	NM_016337 // ENST00000392920 // AF087843 // ENST00000402714	EVL	Enah/Vasp-like	51466
16658664	-0.0512386	0.919054	-0.0438172	0.93446	0.29138	0.0298411	0.298801	0.032083	-0.970679	1.76651e-08	-0.150743	0.547491	0.0108236	0.974896	0.83076	1.5718e-07	0.144416	0.446723	-0.13614	0.666343		9.7474	9.63654	9.49486	9.61887	9.73235	9.5103	9.91977	10.1304	10.1177	10.5282	10.3262	10.384	9.44675	9.45556	9.38247	9.34136	9.50591	9.54494	9.45583	9.42354	9.5119	9.11843	8.89945	9.08902
16650043	-0.0979364	0.969948	-0.752976	0.683903	-0.20054	0.797318	-0.85558	0.221665	-0.970342	0.0565259	0.157157	0.938879	-0.952072	0.150701	0.175427	0.800407	-0.139831	0.926133	-0.891363	0.359165		6.1898	5.92662	6.14927	6.08195	6.14217	5.97478	6.13141	6.28231	6.04733	7.02861	7.25533	7.0059	7.6521	8.00176	7.74473	7.42127	7.31531	7.49397	7.35949	7.31607	7.17423	7.4001	7.39849	7.3539	NM_012259 // ENST00000368364 // AK303890 // ENST00000368365	HEY2	hairy/enhancer-of-split related with YRPW motif 2	23493
16797516	-0.0598608	0.921896	0.120529	0.815053	-0.0972442	0.614894	0.0831457	0.78129	-0.96989	2.11982e-07	-0.344368	0.0758886	-0.0244536	0.94943	0.601068	9.20671e-05	0.158626	0.505494	0.231416	0.408473		7.98417	8.05207	7.94047	8.08887	8.11858	8.11761	7.88854	8.02522	7.90654	8.98855	9.01428	8.90381	8.18702	8.17314	8.09773	8.12745	8.18726	8.04364	8.31305	8.2278	8.07133	8.57075	8.6197	8.56697	NM_015254 // ENST00000357808 // AF279865 // ENST00000355514 // ENST00000404075 // ENST00000524189 // ENST00000522355 // ENST00000523968 // ENST00000522846	KIF13B	kinesin family member 13B	23303
16920671	-0.10585	0.890951	0.227687	0.728574	-0.20806	0.367427	0.125477	0.736439	-0.969268	7.27002e-06	0.084003	0.902083	-1.61892	2.15951e-08	-0.565645	0.00249994	1.36704	2.78593e-07	-0.0438184	0.966218		7.00573	6.93498	7.05917	7.04166	7.18094	6.97094	5.26458	5.08856	4.77619	5.3792	4.94004	5.36606	7.17393	7.42016	7.27719	6.93991	7.12052	7.30429	7.28884	7.14526	7.24923	7.12184	7.35249	7.41467	NM_032587 // ENST00000254691 // AF356193 // ENST00000444789 // ENST00000509771	CARD6	caspase recruitment domain family, member 6	84674
16824352	-0.0445596	0.972117	-0.0377531	0.978991	1.1728	0.000107302	1.17961	0.000116302	-0.968078	0.000241677	-0.728552	0.0241648	0.410391	0.231148	0.649918	0.00932672	-0.0603605	0.935406	-0.822774	0.013201		9.20937	8.97808	9.19686	9.4463	9.203	9.39318	9.72168	9.71653	9.72417	8.27646	8.27405	8.16393	9.57788	9.36968	9.44888	9.35217	9.38237	9.52053	9.76533	9.42352	9.52331	9.25716	9.06145	9.23842	NM_004289 // ENST00000056233 // BC068455	NFE2L3	nuclear factor (erythroid-derived 2)-like 3	9603
17126198	0.395754	0.620226	-0.308157	0.682027	0.308976	0.215064	-0.394935	0.143148	-0.966638	3.2752e-05	-0.0430826	0.963144	0.146931	0.714649	1.07049	1.07615e-05	-0.0470327	0.941123	-0.209078	0.735741		6.76423	6.71194	6.68228	6.4814	6.62046	6.52634	6.73561	6.89908	6.7218	8.13636	7.8684	8.15754	6.81354	6.76615	6.76916	6.90195	6.75098	6.89175	6.7617	6.94835	6.68119	6.79923	6.77652	6.73015	NM_001172128 // NM_172217 // NM_004513 // ENST00000394656 // ENST00000394660 // ENST00000360547 // ENST00000394653 // ENST00000394652 // BC136660 // ENST00000355368 // ENST00000394655	IL16	interleukin 16 (lymphocyte chemoattractant factor)	3603
16654537	-0.23829	0.797238	0.0208057	0.988866	-0.242953	0.463571	0.0161425	0.982613	-0.965167	0.000321062	-0.203531	0.781988	-0.0262467	0.97157	0.735389	0.00438378	-0.226496	0.645791	-0.00978942	0.996999		7.58225	7.70244	7.52838	7.68547	7.57965	7.34548	6.7035	6.79271	6.98207	8.08773	8.1533	8.05744	7.21384	6.85839	6.87558	6.93976	6.70357	6.54906	6.18488	6.25448	5.99673	6.2046	5.95224	6.30372
16653499	-0.0329437	0.988147	-0.233229	0.881112	0.472324	0.336769	0.272039	0.733379	-0.96501	0.0136348	-0.526281	0.525445	0.164396	0.856693	0.603125	0.14309	0.207457	0.832091	-0.100471	0.96301		8.49198	8.96515	8.856	8.99375	8.89588	8.97414	7.71949	7.68589	7.59738	9.45011	9.2601	9.3472	8.32078	8.4045	8.29695	8.28209	8.505	8.36602	6.51624	6.95781	6.94627	6.39946	7.13243	7.08141	BX647165	TRAV20	T cell receptor alpha variable 20	28663
16857490	0.0197327	0.974937	-0.0650086	0.890353	0.0375	0.841795	-0.0472413	0.87038	-0.963874	2.32897e-08	-0.41453	0.00561888	-0.269499	0.0600097	0.279845	0.0180956	0.0855972	0.736119	-0.221402	0.306991		10.6298	10.5599	10.7055	10.6634	10.5446	10.6562	10.6945	10.597	10.6042	9.60744	9.28695	9.23044	10.5025	10.6174	10.5405	10.4172	10.4479	10.5299	10.5884	10.6291	10.5762	10.4644	10.3438	10.4053
16937137	0.108976	0.820486	-0.0765799	0.879333	-0.150837	0.345769	-0.336394	0.0267854	-0.963844	6.83744e-08	-0.357146	0.0337997	0.144013	0.488726	0.750711	2.12929e-06	-0.427008	0.00361489	-0.132158	0.725712		5.85128	5.55259	5.71534	6.2234	5.853	5.9265	5.9862	6.19525	5.95457	6.03957	6.13714	5.74224	7.23795	7.53581	7.81563	6.93243	7.34395	7.3242	8.58608	8.35751	8.2732	8.38238	8.24112	8.56865
16816675	0.047533	0.936156	0.00878121	0.991748	0.259283	0.088374	0.220531	0.218197	-0.963624	9.1196e-08	-0.111582	0.756706	-0.230111	0.185452	0.62193	2.87758e-05	0.677522	3.26067e-05	0.188127	0.527637		10.5269	10.5423	10.5398	10.6888	10.5112	10.4812	10.4651	10.4263	10.4245	8.87138	8.47768	8.54686	10.3633	10.5461	10.4877	10.5222	10.4855	10.5843	9.9754	10.4553	10.3551	9.60509	9.93519	9.7336	NR_003697 // AK096179 // ENST00000438705	C7orf40	chromosome 7 open reading frame 40	285958
17054474	0.214311	0.687399	0.0156232	0.985916	-0.0966872	0.662058	-0.295375	0.147384	-0.963266	9.92927e-07	-0.135303	0.751807	-0.298942	0.137364	0.529021	0.00106154	0.163812	0.55553	-0.038443	0.965337		8.52433	8.49003	8.54117	8.63248	8.61432	8.62588	8.75754	8.79852	8.80642	9.77861	9.69083	9.67688	8.78473	8.75074	8.75857	8.85477	8.68954	8.7544	8.84887	8.78608	8.66144	9.06072	9.09382	8.95975	NM_003344 // NM_182697 // ENST00000355621 // BT006756 // ENST00000473814 // ENST00000480245 // ENST00000486283 // ENST00000483368 // ENST00000463272	UBE2H	ubiquitin-conjugating enzyme E2H (UBC8 homolog, yeast)	7328
16721884	0.166617	0.676008	-0.000231413	0.999534	0.107731	0.459492	-0.0591174	0.814397	-0.962641	1.11105e-08	-0.0689055	0.855963	0.0533612	0.832462	0.947097	1.42435e-08	0.0759159	0.760982	0.0215463	0.974453		8.47074	8.45666	8.67266	8.57909	8.31926	8.56142	8.64708	8.58619	8.55155	6.16508	5.94613	6.1659	7.6792	7.80307	8.00314	7.755	7.94506	7.78919	7.01063	7.78439	7.58057	6.13368	6.67464	6.52662	ENST00000390331	IGLC7	immunoglobulin lambda constant 7	28834
17026762	0.08076	0.875924	0.120787	0.796123	0.288751	0.0505562	0.328778	0.0310095	-0.961417	7.03443e-08	-0.784256	1.08721e-05	0.560986	0.000222377	0.738148	2.61913e-06	0.116919	0.633075	0.389154	0.0270824		4.56332	4.58919	4.64995	4.25083	4.90866	4.55035	4.5715	4.65987	4.35887	4.95502	4.9982	5.34052	4.8862	5.0809	4.73276	4.67387	4.9005	4.49496	5.31823	5.19892	5.37888	7.25838	7.46982	7.36007	NM_001178015 // NM_022058 // NM_001178016 // ENST00000446997 // ENST00000375514 // ENST00000415876 // BC143714 // BC136269 // AK293793 // AY376402 // AB040457 // AK294767 // ENST00000446228 // ENST00000449513 // ENST00000415711 // ENST00000272716 // ENST00000421911 // ENST00000493021 // ENST00000461456 // ENST00000481721 // AK308529 // AK309839	SLC4A10	solute carrier family 4, sodium bicarbonate transporter, member 10	57282
17029082	0.08076	0.875924	0.120787	0.796123	0.288751	0.0505562	0.328778	0.0310095	-0.961417	7.03443e-08	-0.784256	1.08721e-05	0.560986	0.000222377	0.738148	2.61913e-06	0.116919	0.633075	0.389154	0.0270824		11.7938	11.7764	11.8205	11.7281	11.7845	11.8036	11.7479	11.7211	11.7688	12.8079	12.6413	12.6856	11.9634	12.0378	11.9988	11.8165	12.094	12.0606	11.6328	11.6886	11.5728	11.6373	11.7127	11.6709	NM_001040033 // NM_000560 // ENST00000271324 // BC040693 // ENST00000429072 // ENST00000468160 // ENST00000476408 // ENST00000497404 // ENST00000464329 // ENST00000471220	CD53	CD53 molecule	963
17031867	0.08076	0.875924	0.120787	0.796123	0.288751	0.0505562	0.328778	0.0310095	-0.961417	7.03443e-08	-0.784256	1.08721e-05	0.560986	0.000222377	0.738148	2.61913e-06	0.116919	0.633075	0.389154	0.0270824		9.30747	9.30474	9.21278	9.39345	9.32857	9.25277	9.51913	9.70715	9.61069	10.2779	10.3912	10.2969	9.46965	9.28966	9.31745	9.43432	9.40165	9.2963	9.31596	9.34947	9.32869	9.31771	9.28951	9.1539	NM_005026 // ENST00000377346 // BC150297 // ENST00000361110 // ENST00000360563 // ENST00000469267 // ENST00000484851 // ENST00000479223	PIK3CD	phosphoinositide-3-kinase, catalytic, delta polypeptide	5293
17034339	0.08076	0.875924	0.120787	0.796123	0.288751	0.0505562	0.328778	0.0310095	-0.961417	7.03443e-08	-0.784256	1.08721e-05	0.560986	0.000222377	0.738148	2.61913e-06	0.116919	0.633075	0.389154	0.0270824		5.88974	5.83217	5.75397	5.91134	5.95189	5.50501	6.4732	6.8802	6.64303	6.62773	6.47352	6.55039	7.90287	7.64494	7.97134	7.61518	7.54883	7.75091	8.26725	8.13434	8.29097	8.16107	8.12071	8.29427
17036587	0.08076	0.875924	0.120787	0.796123	0.288751	0.0505562	0.328778	0.0310095	-0.961417	7.03443e-08	-0.784256	1.08721e-05	0.560986	0.000222377	0.738148	2.61913e-06	0.116919	0.633075	0.389154	0.0270824		9.86551	9.5203	9.49145	9.99633	9.52326	9.73969	10.5435	10.8601	10.8462	7.21853	7.61197	7.29814	7.9566	8.0254	7.76748	7.9522	7.86194	8.0751	6.63305	7.86974	7.44098	6.52449	6.22268	6.38512	ENST00000390322	IGLJ2	immunoglobulin lambda joining 2
17039380	0.08076	0.875924	0.120787	0.796123	0.288751	0.0505562	0.328778	0.0310095	-0.961417	7.03443e-08	-0.784256	1.08721e-05	0.560986	0.000222377	0.738148	2.61913e-06	0.116919	0.633075	0.389154	0.0270824		9.90446	9.69407	9.87511	10.0334	9.67509	9.79534	9.27322	9.35885	9.12428	11.1401	11.1524	11.0965	9.23952	8.75892	8.93849	9.23314	8.80514	8.97469	9.44112	9.38457	9.36696	10.7857	10.955	10.9462	NM_003722 // NM_001114978 // NM_001114980 // NM_001114981 // NM_001114979 // NM_001114982 // ENST00000264731 // ENST00000354600 // ENST00000392460 // ENST00000418709 // ENST00000392463 // ENST00000437221 // BC039815 // AB016073 // AK304127 // AF075430 // AF091627 // GQ202690 // AF075431 // AB016072 // AF116771 // AB010153 // AB042841 // AF075432 // GQ202689 // AF075433 // AF075428 // AF075429 // …	TP63	tumor protein p63	8626
17041863	0.08076	0.875924	0.120787	0.796123	0.288751	0.0505562	0.328778	0.0310095	-0.961417	7.03443e-08	-0.784256	1.08721e-05	0.560986	0.000222377	0.738148	2.61913e-06	0.116919	0.633075	0.389154	0.0270824		6.27697	6.25112	6.44477	6.51933	6.39113	6.47623	7.10215	7.11219	7.20706	7.29799	7.40728	7.37726	7.4206	7.40683	7.44664	7.39325	7.36694	7.33078	7.68439	7.73649	7.57195	7.73732	7.87486	7.80016	NM_020169 // ENST00000264265 // BC008438	LXN	latexin	56925
16880924	0.0143008	0.985149	-0.182577	0.709835	0.0338043	0.880414	-0.163073	0.44836	-0.959925	1.54202e-07	-0.126146	0.724362	0.0501576	0.876641	0.883937	4.93927e-07	-0.0625241	0.857195	-0.0461708	0.94461		8.64899	8.56877	8.63519	8.72694	8.61567	8.67088	8.90572	8.80921	8.95383	8.00675	7.81364	7.85823	8.77825	8.74001	8.86938	8.64273	8.72415	8.78826	8.76434	8.79571	8.75388	8.44929	8.53367	8.55438
16728439	0.175097	0.75538	0.0796758	0.905352	0.29684	0.116328	0.201419	0.426715	-0.959851	1.62377e-06	-0.292506	0.283958	-0.0390071	0.927833	0.628338	0.000274644	0.222376	0.36746	-0.113472	0.857065		5.15773	4.9867	5.21675	5.27032	5.1736	4.99132	5.54871	5.51119	5.78986	7.17584	7.2011	7.19951	5.65708	5.66962	5.68733	5.49613	5.66489	5.41995	5.69414	5.34072	5.35388	5.76525	5.68112	5.82567
16704690	0.0546458	0.895375	-0.00809145	0.988866	0.393772	0.000682594	0.331035	0.00411002	-0.959621	1.94003e-09	-0.269394	0.0392661	0.185579	0.147606	0.875806	6.9066e-09	0.470658	8.89569e-05	0.262466	0.0678574		10.8671	10.9081	10.8951	10.9045	10.8736	10.8688	10.8688	10.8514	10.8071	10.0914	9.90028	9.97736	10.9415	10.9402	10.9549	10.832	10.9534	10.9642	10.8712	10.9451	10.906	10.8009	10.7917	10.8516	NM_002703 // ENST00000264220 // D13757 // ENST00000510643 // ENST00000507724 // ENST00000507648 // ENST00000425339	PPAT	phosphoribosyl pyrophosphate amidotransferase	5471
17007910	0.104927	0.847726	-0.0785515	0.886026	0.137955	0.439313	-0.0455243	0.896342	-0.958934	2.16089e-07	-0.0596104	0.910557	-0.720984	2.93744e-05	0.17834	0.230219	0.368515	0.0222178	-0.490424	0.00725209		9.23884	9.15625	9.32358	9.08548	9.22699	9.36431	9.34203	9.57309	9.66198	8.01109	8.24615	8.30177	9.47916	9.66225	9.76767	9.64411	9.65003	9.84597	9.86653	9.92361	10.0246	8.01442	8.03514	8.12905	NR_026691 // NM_001558 // ENST00000227752 // AK301492	IL10RA	interleukin 10 receptor, alpha	3587
17099697	-0.129843	0.91822	0.0366047	0.982606	-0.327411	0.375174	-0.160964	0.803323	-0.957815	0.00133202	0.104841	0.92784	-0.163846	0.791697	0.898811	0.00259087	-0.159426	0.823713	0.00413927	0.998076		7.53107	7.49035	7.62798	7.76016	7.44589	7.63914	8.16496	8.10062	8.10404	6.60345	6.43564	6.20744	7.7597	7.57957	8.02589	7.83879	7.69146	7.75433	8.38301	8.24912	8.2676	7.96364	7.78394	7.7689	ENST00000390543 // BX640824 // BC025985	IGHG4	immunoglobulin heavy constant gamma 4 (G4m marker)	3503
16651409	-0.19735	0.898388	-0.555456	0.679024	0.324584	0.497983	-0.0335223	0.974616	-0.956828	0.00836284	-0.0232042	0.992106	-0.048092	0.963471	0.885532	0.015479	0.115038	0.911908	-0.257637	0.855487		7.07452	6.75809	6.91153	7.15645	6.99933	6.96772	7.15645	6.92451	7.0172	6.06252	6.07417	5.89101	6.95611	7.14604	7.00248	6.83922	6.91939	7.07971	7.55941	7.5258	7.4688	7.4073	7.35798	7.38668
16651481	-0.544159	0.738212	-0.161034	0.942332	0.451008	0.466806	0.834132	0.194214	-0.956324	0.0435226	0.0802897	0.971065	-0.153093	0.897584	0.88352	0.0681443	-0.0429198	0.978214	-0.647021	0.565449		9.06155	8.97937	8.81309	9.10641	8.9418	8.89231	9.8187	9.66547	9.69045	8.30837	7.89122	8.11466	9.25282	8.84724	9.05184	9.13578	9.02745	9.01878	9.11829	9.19993	9.17684	8.6766	8.62609	8.70635	NM_001803 // ENST00000374213 // BC000644 // ENST00000492808 // ENST00000470468	CD52	CD52 molecule	1043
16654519	-0.118431	0.900994	-0.233244	0.777724	0.0368291	0.925668	-0.0779834	0.890629	-0.955527	9.1941e-05	-0.260955	0.611083	0.00701321	0.993096	0.701585	0.00222566	-0.221037	0.592157	-0.250853	0.686779		8.48609	8.28948	8.41215	8.59583	8.42217	8.43977	9.11044	9.28654	9.28177	9.86244	9.9151	9.70766	8.41543	8.60834	8.53927	8.4753	8.56437	8.5515	8.69189	8.78182	8.58341	8.49321	8.66467	8.50974	NM_001080530 // NM_032167 // ENST00000306030 // ENST00000268271 // ENST00000323433 // BC029857	SNX29 // RUNDC2A	sorting nexin 29 // RUN domain containing 2A	92017 // 84127
16651205	0.383366	0.797016	-0.358952	0.812021	0.342937	0.52789	-0.399381	0.578237	-0.954547	0.0186827	-0.660981	0.379076	0.0894942	0.936323	0.38306	0.414082	0.250885	0.79213	-0.00255744	0.999054		6.73158	6.77525	6.7899	6.93325	6.9766	6.8422	7.73844	7.60469	7.86488	6.70651	6.76905	6.67803	6.74463	6.83508	6.7339	6.91798	6.75928	6.88553	6.10829	6.20222	6.14795	6.39317	6.08611	5.8783
16677547	-0.0532094	0.928212	-0.0162922	0.983396	-0.115331	0.514594	-0.0784133	0.785686	-0.954322	1.50146e-07	-0.0926214	0.826243	-0.149023	0.49729	0.712679	7.58057e-06	-0.0592818	0.864079	-0.0929738	0.859868		10.907	11.1034	11.1053	11.0646	11.1714	11.033	10.9358	11.0048	11.0222	9.92912	9.98832	9.86994	11.2892	11.1121	11.2242	11.157	11.2326	11.2129	10.8439	10.8634	10.8574	10.2271	10.3532	10.4071	NM_006838 // ENST00000323666 // ENST00000261220 // AK125296	METAP2	methionyl aminopeptidase 2	10988
17024362	0.171826	0.695806	-0.0348605	0.957813	0.069261	0.711609	-0.137425	0.52604	-0.953737	8.80933e-08	-0.071443	0.874507	-0.12966	0.556294	0.752635	2.26893e-06	0.262997	0.104191	0.0640758	0.912404		8.98405	8.88841	8.86791	9.01708	9.03616	8.97933	9.19846	9.24425	9.27096	10.6163	10.4882	10.5282	8.97535	8.99708	9.06605	8.74404	9.12065	9.20589	9.34417	9.28819	9.26504	10.0185	9.94826	9.99121	NM_138621 // NM_006538 // ENST00000393256 // ENST00000357682 // ENST00000308659 // ENST00000422765 // BC033694 // AF455755 // AK291269 // AY423443 // AB071195 // AY423442 // AY428962 // AF032457 // AB071196 // AB071197 // AY423441 // DQ849200 // DQ849202 // AF032458 // AB071198 // AY305715 // AK290377 // AY305716 // DQ849201 // AB071199 // AY305714 // AB071200 // ENST00000452033 // ENST0000043309…	BCL2L11	BCL2-like 11 (apoptosis facilitator)	10018
16876648	0.111404	0.798618	-0.0532864	0.919761	0.0277315	0.891459	-0.136959	0.486856	-0.953139	3.475e-08	-0.275349	0.113969	0.257863	0.0832372	0.935652	4.53417e-08	-0.364933	0.00824744	-0.134802	0.68545		5.54581	5.67809	5.61886	5.23013	5.24814	5.43878	5.57087	5.77098	5.51982	7.32862	7.66843	7.38632	5.24375	5.3047	5.55206	5.42871	5.46532	5.54773	5.48142	5.61609	5.62182	5.58052	5.39914	5.91451	NM_020347 // ENST00000296135 // AK093705 // ENST00000418700 // ENST00000448111 // ENST00000439019 // ENST00000411866 // ENST00000472635 // ENST00000495864 // ENST00000490463 // ENST00000492333 // ENST00000480156 // ENST00000483279 // ENST00000469874 // ENST00000478551	LZTFL1	leucine zipper transcription factor-like 1	54585
16656661	0.301619	0.722315	0.251866	0.778189	0.0679949	0.863849	0.0182414	0.97919	-0.951957	0.000222897	-0.124773	0.886124	-0.0484755	0.941844	0.778709	0.00177828	0.0340711	0.965363	-0.0823993	0.944986		4.63259	4.46409	4.83217	5.02783	4.95332	4.8146	4.63322	5.04058	4.98896	5.43744	5.52622	5.45588	6.67916	6.39602	6.75458	6.51206	6.64119	6.44789	7.39328	7.20857	6.90519	6.68592	6.98107	6.59502
16954724	-0.0305335	0.959227	-0.0290085	0.963092	-0.074906	0.665977	-0.0733809	0.778167	-0.951099	4.39482e-08	-0.460025	0.00284326	-0.0251878	0.940181	0.465887	0.000337958	-0.196217	0.251572	-0.146499	0.647494		7.72707	7.83484	8.47617	8.30507	7.98316	8.27016	9.77341	10.2538	10.4089	10.2823	10.2525	10.2847	10.7949	11.2426	11.3561	10.8466	11.1062	11.3099	12.483	12.4622	12.5305	12.7444	12.7898	12.8055
16834302	-0.0208388	0.973648	-0.0190308	0.978445	-0.100229	0.533308	-0.0984216	0.668391	-0.950256	3.93525e-08	-0.454489	0.00291866	0.214636	0.182138	0.710403	2.12546e-06	-0.292135	0.042249	0.0227304	0.97518		4.50933	5.1468	5.16372	4.99659	4.87985	5.29073	5.02709	4.8917	4.98679	7.98954	8.09311	7.31248	4.85434	5.01727	4.82974	5.1541	5.36753	5.33811	5.01621	4.91335	5.14908	5.58857	5.25077	5.57009	ENST00000390639	IGHV7-81	immunoglobulin heavy variable 7-81 (non-functional)	28378
16739636	-0.0975918	0.92449	-0.109135	0.913352	-0.0935226	0.792706	-0.105066	0.847348	-0.949103	0.000151924	-0.282368	0.5871	-0.146066	0.756914	0.520669	0.0261055	0.00308924	0.997828	-0.049454	0.971054		8.98537	9.02731	8.95294	9.08181	9.05019	9.1757	10.0897	10.3404	10.2088	9.64979	9.61407	9.58085	9.21797	9.08837	9.14854	9.12392	9.16395	9.1676	8.94468	9.15845	9.01144	9.7403	9.51764	9.66314	NM_005116 // NM_203327 // ENST00000338244 // ENST00000379324 // ENST00000379333 // AF164142 // ENST00000437886 // ENST00000424750 // ENST00000423430 // ENST00000468355 // ENST00000496331	SLC23A2	solute carrier family 23 (nucleobase transporters), member 2	9962
17017224	0.0870222	0.941789	0.166601	0.872224	0.281263	0.393994	0.360842	0.356229	-0.948368	0.000471077	-0.840572	0.0114185	0.434934	0.22159	0.54273	0.0382602	0.188091	0.736885	0.341762	0.59052		8.59844	8.64971	8.46011	8.55763	8.67315	8.67493	8.59085	8.6716	8.70843	7.66833	7.47079	7.65803	8.73487	8.81953	8.65358	8.69333	8.57887	8.65308	8.82496	8.79864	8.7824	8.56524	8.53452	8.47668	NM_198516 // ENST00000227756 // BC037341	GALNTL4	UDP-N-acetyl-alpha-D-galactosamine:polypeptide N-acetylgalactosaminyltransferase-like 4	374378
16881434	0.114792	0.770746	0.0772932	0.85908	0.197731	0.130269	0.160233	0.329817	-0.948197	1.20951e-08	-0.138829	0.566643	0.0203364	0.947185	0.829704	8.20665e-08	0.0881972	0.700635	-0.0891975	0.826007		11.3369	11.3246	11.2548	11.2358	11.2573	11.2663	11.7805	11.866	11.7519	12.3298	12.3914	12.28	11.569	11.6065	11.5733	11.4279	11.5227	11.5355	11.5074	11.5666	11.5592	11.5682	11.5449	11.5079	NM_002350 // NM_001111097 // ENST00000502902 // ENST00000507431 // BC126458 // ENST00000519728 // ENST00000520220 // ENST00000520050 // ENST00000420292	LYN	v-yes-1 Yamaguchi sarcoma viral related oncogene homolog	4067
17119348	0.138403	0.88108	-0.337174	0.682027	0.159918	0.607745	-0.315658	0.351437	-0.946607	0.000111019	-0.418876	0.264525	-0.113665	0.820354	0.414065	0.0723951	0.398186	0.188012	0.124602	0.900801		7.9135	7.87679	8.01	8.2093	8.09284	8.11761	7.62211	7.70986	7.78614	7.25224	7.06002	7.12681	8.27178	8.12686	8.26243	8.26758	8.21775	8.34227	8.37044	8.51446	8.39407	8.20817	8.15992	8.20412	NM_022825 // NM_203473 // NM_203474 // NM_203475 // ENST00000326194 // ENST00000355961 // ENST00000355092 // ENST00000359882 // ENST00000361988 // AK056340 // ENST00000485288 // ENST00000367574 // ENST00000472520 // ENST00000470275 // ENST00000489940 // ENST00000491243 // ENST00000486272 // ENST00000459953	PORCN	porcupine homolog (Drosophila)	64840
17049183	0.0760077	0.899419	-0.0302652	0.967019	0.545592	0.000986125	0.439319	0.00799875	-0.946604	3.61401e-07	-0.149129	0.666235	0.375179	0.0239301	1.17265	1.89975e-08	0.0249446	0.954485	-0.145468	0.729185		8.46821	8.24705	8.46657	8.66227	8.51079	8.6531	8.47893	8.6327	8.64185	7.73129	7.5953	7.59904	8.66291	8.54904	8.62009	8.45401	8.56101	8.63688	8.73485	8.77607	8.61436	8.79271	8.80629	8.79524	NR_033929 // AK091527	FLJ34208	hypothetical LOC401106	401106
16810972	-0.101513	0.948073	-0.136421	0.926211	-0.0372732	0.951137	-0.0721815	0.934525	-0.946218	0.00434787	-0.484602	0.4542	0.0198624	0.984732	0.481479	0.167488	0.123041	0.891809	0.180177	0.90137		7.68668	7.8902	7.63621	7.7534	7.78095	7.89845	7.71188	8.0911	7.91581	9.16632	9.42834	9.38491	8.05158	7.97866	8.02014	7.90925	8.038	7.99003	8.16869	8.17764	8.12911	8.95949	8.8187	8.76919
16655485	0.0720273	0.98597	-0.21817	0.951249	0.142369	0.911749	-0.147828	0.94049	-0.943597	0.218489	0.173967	0.956999	-0.306138	0.856294	0.811426	0.316168	0.199237	0.926589	-0.24927	0.944706		7.70349	7.44206	7.37979	7.68058	7.75649	7.5545	8.88346	8.79863	8.85757	8.60259	8.46821	8.5123	8.86387	9.10526	9.11001	8.86655	8.91882	9.0011	8.91801	9.16846	9.10433	8.90013	8.80239	8.88851
16949780	0.214775	0.607469	-0.0600479	0.890353	0.216738	0.0888466	-0.0580852	0.811802	-0.942619	1.02688e-08	0.0896481	0.770634	0.123937	0.484235	1.1562	5.46081e-10	0.190551	0.195084	0.0977499	0.787799		8.19898	7.93192	8.20504	8.36082	8.24866	8.21525	6.76228	6.57739	6.96824	7.4295	7.41657	7.40352	8.59098	8.45735	8.55799	8.32833	8.56218	8.59447	8.61881	8.54234	8.27327	8.53318	8.61784	8.56389	NM_005160 // ENST00000324198 // BC036797 // ENST00000455558	ADRBK2	adrenergic, beta, receptor kinase 2	157
16852267	0.244612	0.904521	-0.14336	0.951158	-0.326388	0.623204	-0.714361	0.30329	-0.941677	0.0477877	-0.317144	0.836629	0.451574	0.588308	1.07611	0.0245269	-0.851538	0.180591	-0.0735757	0.981425		10.2014	10.3068	10.2289	10.3136	10.382	10.3135	10.1187	10.2495	10.1807	10.5071	10.5734	10.4994	9.69881	9.68319	9.67004	9.66963	9.73298	9.64667	9.73571	9.74055	9.683	9.71748	9.76035	9.74502	NM_020336 // ENST00000262879 // ENST00000397040 // BC047482 // AK304242 // ENST00000397038 // ENST00000397042 // AB033045 // ENST00000304939 // AK125916 // BX641080 // ENST00000461423 // ENST00000461147 // ENST00000490114 // ENST00000438490	RALGAPB	Ral GTPase activating protein, beta subunit (non-catalytic)	57148
17056310	0.188091	0.779967	-0.13035	0.859116	0.409947	0.0594609	0.0915061	0.831201	-0.941207	1.43599e-05	-0.160392	0.757155	0.599093	0.00545845	1.37991	1.02353e-07	0.0330439	0.954499	0.22219	0.658855		11.0515	10.995	11.1275	11.0742	10.9459	11.1008	11.1211	11.0055	11.0376	10.0466	9.67558	9.70599	10.904	11.0415	11.0277	10.8774	10.9183	10.9796	11.0381	11.0616	11.0215	10.8969	10.7897	10.837
17041350	-0.0415091	0.984227	0.195836	0.89956	0.169427	0.763902	0.406772	0.52173	-0.94073	0.0123343	-0.0403945	0.984266	-0.404214	0.521064	0.496122	0.221855	0.491811	0.410025	-0.081829	0.970632		8.94594	8.8366	8.7559	8.93612	8.95564	8.77561	9.43295	9.45575	9.46517	9.94962	9.85324	9.76286	9.1665	9.05476	9.0415	9.10205	9.11353	9.06316	9.06226	9.09547	8.9967	8.84502	8.89263	8.77648	NM_001083602 // NM_001083603 // NM_000264 // NM_001083606 // NM_001083607 // NM_001083605 // NM_001083604 // ENST00000437951 // ENST00000375284 // ENST00000430669 // ENST00000331920 // ENST00000375290 // ENST00000418258 // ENST00000429896 // ENST00000375275 // ENST00000421141 // ENST00000375274 // U43148 // U59464 // BC043542 // ENST00000450369 // AB209495 // ENST00000375276 // AB189438 // AB2334…	PTCH1	patched 1	5727
16654629	-0.0771139	0.972117	-0.57102	0.711438	0.15672	0.813647	-0.337186	0.684317	-0.940677	0.0272343	-0.113157	0.949725	-0.269607	0.75598	0.557912	0.226205	0.114713	0.927967	-0.311614	0.848745		9.50667	9.4397	9.26864	9.44406	9.50107	9.43324	9.57007	9.58476	9.61209	10.6289	10.5432	10.5508	9.54792	9.53956	9.53395	9.58793	9.49993	9.58186	9.84444	9.6756	9.64159	10.0635	10.022	9.98409	NM_001145063 // NM_001145064 // BC147030 // ENST00000332301	GATSL1 // GATSL2	GATS protein-like 1 // GATS protein-like 2	389523 // 729438
16656633	0.189604	0.906789	-0.259394	0.862727	0.3134	0.534311	-0.135598	0.887252	-0.939492	0.0125136	-0.137171	0.927641	0.212577	0.791293	1.0149	0.00784309	-0.0153611	0.991563	-0.116184	0.949815		4.52432	4.94766	4.97975	4.90274	4.45582	4.81044	5.31528	4.93664	4.90147	7.704	8.79398	8.5751	4.84678	4.88266	4.71249	5.09796	4.70404	5.10299	4.76729	5.19676	5.08515	5.19242	5.0095	5.03058
16730308	0.0617525	0.905194	0.0263247	0.966521	0.142101	0.349594	0.106673	0.633286	-0.939069	4.74152e-08	-0.315051	0.0552131	-0.334346	0.0177197	0.289672	0.0172385	0.146806	0.461283	-0.329641	0.058554		6.18509	5.78575	5.68057	6.36081	6.03058	5.83111	6.93679	7.05689	7.09995	3.7218	4.14515	4.4528	6.40534	6.89352	6.99788	6.33886	6.71567	6.74186	7.00806	7.15071	6.99078	4.52466	4.65917	4.25453
16761858	0.092838	0.830279	-0.0416657	0.935796	-0.225383	0.0865911	-0.359886	0.00628886	-0.937956	1.75289e-08	-0.149417	0.531024	0.180549	0.252981	0.969089	1.10188e-08	-0.152191	0.383286	0.253741	0.16074		9.30358	9.29959	9.46818	9.48634	9.42589	9.4024	9.39142	9.47458	9.48613	8.61724	8.43482	8.49028	9.56799	9.43414	9.53336	9.48284	9.45437	9.51103	9.38179	9.42807	9.39582	9.35506	9.36849	9.31053	NM_013300 // ENST00000377673 // BC020967	C12orf24	chromosome 12 open reading frame 24	29902
16769362	0.102829	0.793338	-0.0956106	0.809285	0.109154	0.431666	-0.0892859	0.662542	-0.937832	9.28366e-09	-0.0859936	0.782902	0.0875955	0.661518	0.939434	9.15922e-09	-0.10308	0.609144	-0.124638	0.670402		10.7026	10.5846	10.6898	10.7676	10.5324	10.6131	9.55951	9.46091	9.60529	8.70172	8.50839	8.65582	10.005	9.97711	10.0209	9.99616	9.95601	9.95057	9.68658	9.71175	9.77961	8.78641	8.82353	8.90349
17005888	0.0160941	0.9879	-0.0638777	0.940883	0.315269	0.147094	0.235298	0.411267	-0.93735	1.17432e-05	-0.729726	0.00183046	0.409065	0.0695446	0.616688	0.00120179	0.135001	0.732466	0.228797	0.625837		10.4664	10.4824	10.571	10.525	10.5053	10.4936	10.4254	10.3413	10.4182	9.62564	9.43203	9.46307	10.4615	10.5866	10.5139	10.4625	10.5341	10.4819	10.4277	10.5259	10.4574	10.3252	10.2933	10.3248	NM_213649 // ENST00000355697 // ENST00000392875 // BC050475 // ENST00000330036 // ENST00000369131 // ENST00000419372 // ENST00000461438 // ENST00000466218 // ENST00000490417 // ENST00000462913 // ENST00000484960	SFXN4	sideroflexin 4	119559
16674273	0.154189	0.722315	0.0596764	0.909709	0.20209	0.170479	0.107577	0.639472	-0.936962	6.66497e-08	-0.89541	1.27081e-06	0.173756	0.345207	0.215308	0.0909872	0.113916	0.631181	0.0855821	0.861162		10.3327	10.2152	10.2771	10.2407	10.2683	10.2805	9.93247	10.021	9.99837	10.7298	10.8115	10.7701	10.4021	10.3447	10.2568	10.3168	10.3222	10.328	10.4087	10.4025	10.3765	10.6004	10.5333	10.5677	NM_139276 // NM_003150 // NM_213662 // ENST00000264657 // ENST00000389272 // ENST00000404395 // BC000627 // ENST00000471989 // ENST00000491272 // ENST00000462269 // ENST00000498330 // ENST00000462286	STAT3	signal transducer and activator of transcription 3 (acute-phase response factor)	6774
16756960	0.0810909	0.802097	-0.0290816	0.945023	0.154713	0.138795	0.04454	0.825386	-0.936595	6.02551e-10	-0.0572	0.843938	-0.0488168	0.796095	0.830578	3.18984e-09	0.0935941	0.552643	-0.109935	0.626967		11.4026	11.2909	11.2977	11.3507	11.3195	11.3603	11.497	11.4821	11.5197	10.6804	10.7631	10.6867	11.3575	11.2626	11.3106	11.25	11.3259	11.3055	11.5353	11.5684	11.5474	11.0528	11.1297	11.1745	NM_138340 // ENST00000289119 // BC021196	ABHD3	abhydrolase domain containing 3	171586
16654753	-0.253435	0.91997	0.142202	0.961396	-0.448193	0.569567	-0.0525558	0.974986	-0.935882	0.113434	-0.00951189	0.998558	-0.301263	0.813427	0.625107	0.334182	0.334025	0.810589	0.480955	0.815058		6.91479	6.62823	6.86175	7.09628	6.89863	6.82667	6.89945	6.95567	7.0567	8.3372	8.29347	8.33922	7.01838	6.88352	6.98003	7.12041	6.85539	6.91092	7.11588	7.01534	6.93754	7.20783	7.27559	7.13674	NM_002868 // ENST00000360299 // BX537408 // ENST00000448789	RAB5B	RAB5B, member RAS oncogene family	5869
16817271	0.0429081	0.936112	-0.035269	0.951158	0.405701	0.00268068	0.327524	0.0177423	-0.935327	3.27227e-08	-0.454533	0.00220128	0.155598	0.382854	0.636392	5.96672e-06	0.151434	0.415878	-0.0986688	0.80966		4.78801	4.94188	4.90741	4.85105	4.63459	4.83467	4.84107	4.64177	4.73679	7.17715	8.12946	7.54681	4.75687	4.7381	4.95464	5.05456	4.99402	4.83652	5.02551	5.05414	4.95059	5.59535	6.25027	6.395	NM_006614 // ENST00000256509 // AF002246 // BC104918 // BC143496 // AB209329 // ENST00000397491 // AK126878 // ENST00000453040 // ENST00000445697 // ENST00000421198 // ENST00000435603 // ENST00000489224 // ENST00000470880 // ENST00000461289 // ENST00000470005	CHL1	cell adhesion molecule with homology to L1CAM (close homolog of L1)	10752
16933535	0.0540474	0.915025	-0.037909	0.945293	0.102111	0.505158	0.0101549	0.975357	-0.934715	2.95935e-08	0.257167	0.13443	0.119008	0.54726	1.31089	2.17907e-10	-0.0392707	0.903945	-0.0223742	0.974453		5.21064	5.07218	4.99498	4.93999	5.00141	4.75468	5.01427	4.92063	5.25846	4.75607	4.93649	5.02153	6.32341	6.23381	6.17628	6.43756	6.42348	6.56661	6.10421	6.40264	6.17517	6.44968	6.51392	6.80095
16926299	0.358848	0.604603	-0.28859	0.669561	1.30942	5.53038e-07	0.661981	0.00190863	-0.934407	1.0545e-05	0.0205826	0.982354	0.212875	0.466765	1.16786	6.44307e-07	1.00674	1.49789e-05	-0.0898062	0.913149		8.13814	7.67848	7.96701	8.24384	8.09689	8.04717	8.51655	8.21769	8.38936	10.0674	9.63152	9.51773	7.77871	7.48488	7.7541	7.76853	7.81635	7.76437	8.02866	7.93921	8.05316	7.69454	7.78336	7.8582	NM_001130173 // NM_001161656 // NM_001161658 // NM_005375 // NM_001130172 // NM_001161660 // NM_001161659 // NM_001161657 // ENST00000341911 // ENST00000367814 // ENST00000442647 // ENST00000438901 // ENST00000237302 // ENST00000430686 // BC064955 // M15024 // AF104863 // AY787465 // AJ606318 // AY787455 // AJ606324 // AJ606317 // AY787452 // ENST00000367812 // AJ606323 // ENST00000316528 // ENST…	MYB	v-myb myeloblastosis viral oncogene homolog (avian)	4602
16956621	0.0575955	0.853294	-0.0780694	0.785749	0.22299	0.0116661	0.0873253	0.492647	-0.93404	8.98399e-11	-0.047727	0.854649	0.0583941	0.692509	0.944707	6.85285e-11	0.0863477	0.51841	-0.0782484	0.734265		11.4085	11.4035	11.3899	11.4436	11.3992	11.3513	11.1287	11.1144	11.0498	9.97137	10.0739	10.2612	11.2002	11.1515	11.1655	10.9862	11.0514	11.0749	11.0026	10.9455	10.934	10.8689	10.7037	10.8177	NM_002727 // NR_036430 // ENST00000242465 // BC015516 // ENST00000462445	SRGN	serglycin	5552
16684310	0.0186946	0.969614	-0.0217368	0.964652	-0.0253487	0.872536	-0.06578	0.7356	-0.933202	1.94645e-09	-1.17783	6.68821e-10	-1.10546	4.40489e-10	-1.35009	8.87658e-12	0.2129	0.0687302	-0.867207	1.09621e-07		5.43596	5.54895	5.25045	5.35868	5.32654	5.26521	5.33675	5.54533	5.37417	7.04433	7.22615	7.68369	5.29575	5.07926	5.21114	5.12058	5.26692	5.4229	5.67384	5.26574	5.33842	5.33878	5.23843	5.20047
17071535	0.146519	0.783863	-0.0393829	0.958541	0.0449998	0.851303	-0.140902	0.596052	-0.932656	8.37386e-07	-0.107695	0.814993	-0.370882	0.0355645	0.454078	0.00275493	0.371024	0.0347619	-0.0448579	0.951118		6.44268	6.07584	6.09903	6.26591	6.06772	6.47053	6.09016	6.06761	6.01989	8.51741	9.26639	8.78704	6.29277	6.30081	6.03506	6.05117	6.03007	6.25631	6.27284	5.76479	6.15078	6.47953	7.14372	6.77707	NM_002260 // ENST00000381902 // ENST00000381901	KLRC2	killer cell lectin-like receptor subfamily C, member 2	3822
16739026	-0.0100422	0.989046	-0.0556698	0.925245	0.131381	0.447594	0.0857538	0.758014	-0.932608	2.03595e-07	-0.559187	0.00107752	-0.052003	0.868605	0.321418	0.0166925	0.0848739	0.781204	-0.0985105	0.845539		6.59794	6.77618	6.7996	6.7975	6.69944	6.66907	6.68338	6.75035	6.80888	8.15298	8.45082	8.26065	6.86196	7.10505	7.0622	6.84597	7.15735	7.06943	6.86318	7.07826	6.79001	6.94024	7.13304	6.9535	NM_001731 // ENST00000256015 // BC016759 // AK055439	BTG1 // LOC256021	B-cell translocation gene 1, anti-proliferative // hypothetical protein LOC256021	694 // 256021
16651767	0.152826	0.928212	0.114156	0.951628	0.458215	0.341549	0.419544	0.514619	-0.931352	0.0149408	0.0739372	0.965778	-0.325393	0.644332	0.679897	0.0854581	0.691037	0.177933	-0.0925701	0.966108		9.20973	9.08866	8.97927	9.10504	9.08808	9.09045	9.12407	9.04035	9.02216	7.70158	7.91883	7.84415	8.84511	9.03518	8.78546	9.03132	8.95528	8.95138	8.87711	8.82769	8.88483	8.69508	8.40422	8.5091	NM_024036 // ENST00000309602 // BC015581 // ENST00000393952	LRFN4	leucine rich repeat and fibronectin type III domain containing 4	78999
16653493	-0.066076	0.967731	-0.354253	0.764112	0.272775	0.530169	-0.0154017	0.987323	-0.930834	0.00446126	-0.0278699	0.988546	0.154412	0.833808	1.05738	0.00166408	-0.0587562	0.953218	-0.177119	0.901522		9.60515	9.57451	9.62843	9.82133	9.6899	9.75564	9.83951	9.72761	9.90953	8.3265	7.68782	8.07186	9.87631	9.56153	9.848	9.89335	9.75497	9.84377	9.93489	9.75599	9.94092	9.6444	9.51426	9.46128	NM_002467 // ENST00000377970 // V00568 // ENST00000454617	MYC	v-myc myelocytomatosis viral oncogene homolog (avian)	4609
16656623	0.13228	0.905194	-0.184313	0.85691	0.125161	0.744357	-0.191431	0.711519	-0.930104	0.000566575	-0.24468	0.72063	0.0930704	0.882241	0.778494	0.0032119	-0.232164	0.642937	-0.264255	0.731362		6.89315	6.94238	6.67238	6.9491	6.94159	6.81509	4.51094	4.52592	4.80454	4.48833	4.78096	4.23526	4.74055	4.77562	4.40918	4.43107	4.72511	4.70181	4.36028	4.63484	4.62708	4.72037	4.50459	4.56279	NM_005546 // ENST00000422843 // AB209622 // ENST00000231189 // ENST00000456629 // ENST00000519402 // ENST00000519759 // ENST00000520555 // ENST00000519749	ITK	IL2-inducible T-cell kinase	3702
16788296	0.115366	0.780258	-0.103201	0.807545	0.39844	0.00271633	0.179874	0.27619	-0.928675	2.88482e-08	0.0852915	0.809218	-0.126859	0.504042	0.887107	5.49026e-08	0.655098	1.09729e-05	0.129799	0.68492		5.48411	5.59448	5.77461	5.73683	5.72181	5.58859	5.89716	6.24412	5.99945	5.75582	5.97728	6.06231	8.17862	7.42953	7.43402	7.56687	7.27215	7.17968	9.63459	9.10757	8.81482	9.53059	8.89882	8.98765
16825474	0.100389	0.873896	0.0249079	0.976632	0.412561	0.0164914	0.337081	0.0682672	-0.92866	9.86825e-07	-0.808032	5.75771e-05	0.261795	0.193518	0.382423	0.0112327	-0.0141028	0.977302	-0.164869	0.697968		10.4279	10.5308	10.5177	10.3982	10.5485	10.541	10.3629	10.398	10.407	9.53878	9.54254	9.56462	10.4992	10.6692	10.6031	10.6035	10.632	10.665	10.4846	10.5594	10.5045	10.5385	10.5082	10.3669	NM_015112 // ENST00000361297 // BC065499 // AB047005 // BC015816 // BC006166 // ENST00000372009 // ENST00000432341 // AK096519 // ENST00000372008 // AK027123 // ENST00000456625 // AK055291 // ENST00000489579 // ENST00000498364 // ENST00000468212 // ENST00000482881 // ENST00000470809 // ENST00000477968 // AK309510	MAST2	microtubule associated serine/threonine kinase 2	23139
16656579	-0.157927	0.924183	-0.136041	0.937604	-0.050922	0.939918	-0.0290367	0.978713	-0.927547	0.0128069	-0.0752567	0.964164	0.182947	0.827056	1.03524	0.00628557	-0.301857	0.694228	-0.0679877	0.976764		8.44335	8.25432	8.34029	8.32186	8.39019	8.18012	8.11544	8.04219	8.24475	9.57629	9.46432	9.47428	8.30544	8.35649	8.37625	8.1948	8.29332	8.44615	8.24315	8.49058	8.30727	8.61096	8.84175	8.89144	NM_001142520 // NM_001142519 // NM_001142521 // NM_022074 // NM_198847 // ENST00000423534 // ENST00000420244 // ENST00000435774 // ENST00000361723 // ENST00000440740 // AK092237	FAM111A	family with sequence similarity 111, member A	63901
16928699	0.172794	0.732948	-0.124452	0.823348	0.15778	0.404821	-0.139467	0.599861	-0.926702	8.83611e-07	-0.178608	0.592016	-0.706733	9.06209e-05	0.04136	0.843139	0.105716	0.743568	-0.758797	0.000160731		9.07112	8.93978	8.85487	9.10656	9.13143	9.00896	8.54012	8.53569	8.54445	8.08521	8.408	8.16112	9.36386	9.32991	9.36437	9.15784	9.40861	9.33564	9.47641	9.43278	9.33542	9.40145	9.46881	9.43942	NM_025191 // ENST00000318130 // AF288393 // ENST00000367512 // ENST00000439962 // ENST00000240560 // ENST00000474725 // ENST00000466606 // ENST00000466392	EDEM3	ER degradation enhancer, mannosidase alpha-like 3	80267
17098698	0.0833048	0.820486	-0.000598282	0.999061	0.60475	3.88366e-06	0.520846	2.94201e-05	-0.926677	2.81349e-09	-0.118007	0.589303	0.317586	0.00468841	1.12626	1.59572e-10	0.45974	0.000107116	0.172576	0.353081		6.36005	6.54683	6.50471	6.94476	6.81477	6.62058	6.66817	6.95044	6.93664	8.3135	8.49046	8.32956	8.00277	7.78348	7.74025	7.70405	7.61674	7.76144	7.31906	7.53541	7.50255	7.39162	7.57293	7.52996	BC043407	LOC285401	hypothetical LOC285401	285401
17005582	0.144926	0.846099	0.0426742	0.965018	-0.0554201	0.856844	-0.157672	0.660511	-0.926198	1.9409e-05	-0.662264	0.00588288	-0.999461	2.59446e-05	-0.735528	0.000287385	1.06403	1.27556e-05	0.119993	0.877761		9.63673	9.56699	9.50931	9.69459	9.62389	9.60106	9.59822	9.51994	9.5475	8.36807	8.19164	8.18668	9.7626	9.50554	9.51801	9.91393	9.61882	9.61635	9.5167	9.43376	9.31897	9.10855	9.01445	9.06696	NM_021020 // ENST00000381569 // ENST00000265801 // AF123659 // ENST00000360248 // ENST00000334294 // ENST00000522290	LZTS1	leucine zipper, putative tumor suppressor 1	11178
16764090	0.0560652	0.877881	-0.00524376	0.993274	-0.0614063	0.626842	-0.122715	0.370987	-0.924994	9.49946e-10	-0.108091	0.595005	-0.225724	0.0352119	0.59118	4.98541e-07	0.183968	0.10584	0.0196509	0.970444		5.45369	5.95465	5.61616	5.88219	6.02263	5.79915	6.90403	7.53254	7.16589	7.74735	7.89612	7.62097	8.15029	8.22077	8.09766	7.77105	8.03324	7.86366	8.79927	8.95899	8.51058	8.84745	8.75327	8.57616	NM_003810 // NR_033994 // NM_001190942 // NM_001190943 // ENST00000241261 // BC032722 // ENST00000382750 // ENST00000430881 // ENST00000494851 // ENST00000472804 // ENST00000466777	TNFSF10	tumor necrosis factor (ligand) superfamily, member 10	8743
16905145	0.217038	0.784657	-0.227832	0.780346	0.363622	0.165828	-0.0812475	0.883198	-0.924099	0.000114122	0.268658	0.585154	-1.48225	1.16571e-06	-0.289493	0.222171	1.14022	3.53871e-05	-0.705656	0.0182018		10.3471	10.275	10.2353	10.3651	10.2794	10.365	10.4685	10.3076	10.3906	9.23119	9.19414	9.2336	10.253	10.5005	10.3616	10.3008	10.279	10.4202	10.0974	10.4246	10.2647	10.113	10.121	10.1443	NM_014520 // NM_001105538 // ENST00000254718 // ENST00000381556 // BC050546 // ENST00000426435	MYBBP1A	MYB binding protein (P160) 1a	10514
16755173	0.0300168	0.956137	-0.00223467	0.997207	0.100809	0.500223	0.0685571	0.777035	-0.924061	2.4845e-08	-0.687457	1.28053e-05	-0.0227039	0.941938	0.213901	0.0644546	0.27061	0.0462182	0.147097	0.598037		9.4621	9.18043	9.1856	9.44216	9.29007	9.16078	8.21438	8.62276	8.53994	6.21661	6.01772	6.64386	9.62539	9.86082	9.94288	9.48107	9.8675	9.96739	9.85779	9.72246	9.70416	8.84139	8.63505	8.51398	NM_175862 // NM_006889 // ENST00000330540 // ENST00000264468 // ENST00000393627 // BC040261 // ENST00000383662 // ENST00000482356 // ENST00000483949 // ENST00000478390	CD86	CD86 molecule	942
16858321	0.064251	0.819721	0.033058	0.920344	-0.0341121	0.759858	-0.0653052	0.638582	-0.923601	6.90028e-11	-0.207165	0.0367384	-0.0454347	0.768634	0.671002	6.28553e-09	0.038772	0.836135	0.0274494	0.940358		6.5286	6.51691	6.69817	6.55258	6.74766	6.75494	5.97231	5.90261	5.79171	5.82778	5.79367	5.93401	8.72646	9.27454	9.10949	8.50496	9.11961	9.13357	7.49613	7.65892	7.69513	7.50618	7.8395	7.70233	NM_001113547 // NM_001113546 // NM_016357 // ENST00000341247 // ENST00000394943 // AF198455 // ENST00000420992	LIMA1	LIM domain and actin binding 1	51474
17118836	-0.0133638	0.991728	-0.134528	0.888314	0.0770526	0.839946	-0.0441115	0.94582	-0.922197	0.000283757	-0.338664	0.483659	-0.103043	0.852308	0.48049	0.0483617	0.128647	0.82795	-0.0514487	0.970772		7.66542	7.02279	7.63018	8.02385	7.47313	7.85137	4.64683	4.56786	4.46721	4.56929	4.75723	4.75754	5.08788	4.35829	5.155	4.56192	4.83803	4.49362	5.37648	5.46968	5.53558	5.65893	5.59258	5.75931
16656663	0.249558	0.855137	-0.206073	0.877055	0.5302	0.192321	0.0745691	0.933943	-0.921622	0.00655648	-0.0727086	0.961986	0.0649641	0.94403	0.913877	0.00762911	0.165263	0.849413	-0.299974	0.794919		9.043	8.95235	8.83393	8.98704	8.96697	8.95942	8.8975	8.86786	8.75899	8.05616	8.00761	8.16489	9.03058	9.12068	8.99072	8.9691	9.0284	9.10037	9.14486	9.04254	9.0718	9.19009	9.00559	9.13342	NM_001128431 // NM_001135153 // NM_015359 // NM_001135154 // ENST00000381237 // ENST00000359741 // ENST00000240095 // AK295807 // ENST00000518348	SLC39A14	solute carrier family 39 (zinc transporter), member 14	23516
16654765	-0.0402046	0.970782	0.0298521	0.980554	0.0538134	0.879105	0.12387	0.788165	-0.921387	7.96165e-05	-0.168962	0.78559	-0.0243682	0.969205	0.728057	0.00100857	0.14129	0.767549	0.0631082	0.952084		8.8656	9.08737	9.06316	8.99891	9.0333	9.03836	8.96275	9.10186	9.15141	10.0975	10.2049	10.0836	9.00235	9.0544	9.14669	8.87981	8.98106	9.00316	9.17596	9.16256	9.05167	9.28895	9.18215	9.24042	NM_005587 // NM_001171894 // NM_001130926 // NM_001130927 // NM_001130928 // ENST00000354410 // ENST00000338042 // ENST00000449277 // ENST00000453228 // ENST00000346108 // X68505	MEF2A	myocyte enhancer factor 2A	4205
17029705	-0.0213071	0.963848	-0.0334094	0.94227	-0.658021	1.3343e-06	-0.670124	1.10213e-06	-0.919926	3.11456e-09	-0.888174	4.95573e-08	0.18408	0.148024	0.215831	0.0281214	-1.11711	6.17636e-10	-0.27501	0.0476181		10.3223	10.3716	10.3061	10.3574	10.4652	10.3377	10.4158	10.4939	10.2894	11.5112	11.595	11.3471	10.6484	10.6285	10.6888	10.4973	10.7265	10.6451	10.7655	10.777	10.7604	10.8235	10.9326	10.8542	NM_005575 // NM_175920 // ENST00000489981 // ENST00000231368 // ENST00000379870 // ENST00000395770 // D50810 // ENST00000417755	LNPEP	leucyl/cystinyl aminopeptidase	4012
17118720	-0.239845	0.658237	-0.05387	0.9364	-0.0990768	0.630012	0.0868983	0.782824	-0.91929	8.5845e-07	-0.136846	0.72572	0.0598006	0.861739	0.842244	2.92171e-06	-0.163397	0.521266	-0.00451934	0.997027		7.21131	7.29337	7.23456	7.14564	7.13857	7.06584	6.72116	6.54186	6.64467	6.52261	6.10918	6.59786	6.7703	7.05284	6.89004	7.19039	7.00531	7.01058	8.79772	8.37421	8.46256	7.52742	7.6896	7.7453
16650347	-0.386014	0.76066	0.341433	0.796258	0.539362	0.215127	1.26681	0.00274747	-0.918878	0.0104789	-0.24694	0.829424	-0.634566	0.188497	0.0373715	0.946865	0.906342	0.033493	-0.267586	0.843962		5.63624	5.75317	5.64758	5.87117	5.8355	5.67703	5.73792	5.83235	5.81391	6.88982	7.2169	7.40323	5.88367	5.93705	5.81171	5.64065	5.85254	5.67998	5.68985	5.58675	5.56267	5.67474	5.74175	5.74988	NM_024616 // NM_001171747 // ENST00000264848 // ENST00000431717 // AY830714 // ENST00000480282 // ENST00000430855 // ENST00000467942 // ENST00000497610	C3orf52	chromosome 3 open reading frame 52	79669
16838320	0.0407542	0.960171	0.0792061	0.913254	0.295045	0.139101	0.333497	0.124956	-0.916371	5.3886e-06	-0.476458	0.0320318	-0.703907	0.000404647	-0.263995	0.133992	0.688111	0.000534363	-0.310842	0.319089		9.42877	9.49462	9.51254	9.45813	9.49602	9.48573	9.4837	9.59746	9.61985	8.67072	8.63152	8.73195	9.66394	9.7991	9.75207	9.65416	9.64819	9.74846	9.60926	9.77408	9.72259	9.51669	9.45107	9.46155	NM_001543 // ENST00000261797 // AK292448 // ENST00000424060 // ENST00000522491 // ENST00000518299 // ENST00000518346	NDST1	N-deacetylase/N-sulfotransferase (heparan glucosaminyl) 1	3340
17118305	-0.00532719	0.993618	-0.0402077	0.945464	0.00668956	0.977774	-0.028191	0.931363	-0.915576	9.71818e-08	-0.313068	0.0685271	-0.137313	0.502281	0.465195	0.000421844	0.202266	0.244069	0.0582631	0.919595		3.83449	4.31232	3.35429	4.02151	4.24043	4.00963	4.12845	3.39381	4.0133	3.62291	4.02756	3.94587	7.01953	7.17478	7.34328	6.51573	6.63384	6.52659	6.75669	7.01744	6.66255	6.82805	7.02915	6.61523
16651241	0.121907	0.915595	-0.0203704	0.98929	0.25399	0.466029	0.111713	0.862766	-0.914775	0.000886543	-0.240747	0.738426	-0.0586559	0.936229	0.615372	0.021807	0.30676	0.49985	-0.00588596	0.997809		9.32021	9.52275	9.20479	9.18403	9.35947	9.20992	9.724	10.0763	9.83426	11.6117	11.7789	11.6718	9.5811	9.65363	9.39726	9.24455	9.53656	9.40846	9.38511	9.71005	9.35583	10.2361	10.5456	10.5056	NM_019593 // ENST00000379019 // ENST00000378992 // AL833069 // ENST00000418646	GPCPD1	glycerophosphocholine phosphodiesterase GDE1 homolog (S. cerevisiae)	56261
16650331	-0.0580996	0.975966	-0.229211	0.872732	0.0262569	0.970392	-0.144854	0.871728	-0.913236	0.0118053	-0.190258	0.884132	0.0254556	0.981856	0.748434	0.0422794	-0.0216586	0.986466	-0.0224599	0.994557		9.23545	9.21088	9.33745	9.38522	9.36348	9.53246	9.74613	9.67593	9.82098	8.1782	8.16113	7.79011	8.91838	8.83281	9.04941	8.66436	8.89981	8.99205	8.85601	8.89733	8.87035	7.47363	7.71134	7.9253
16656545	-0.213353	0.912912	-0.474825	0.775738	0.0130243	0.987886	-0.248448	0.803376	-0.913	0.0423778	-0.553396	0.581122	0.155278	0.888627	0.514882	0.300177	-0.217799	0.850264	-0.0755455	0.97973		6.3014	5.74014	6.00217	6.34025	5.98506	5.78327	9.13119	8.97148	8.97191	7.8597	7.58208	7.57223	8.67375	9.11725	8.9393	8.50256	9.01423	9.12038	7.43607	7.84912	7.84169	7.1613	7.53054	7.1328	NM_001490 // NM_001097634 // NM_001097636 // NM_001097633 // NM_001097635 // ENST00000376730 // ENST00000442371 // ENST00000444201 // M97347 // ENST00000488136 // ENST00000480311	GCNT1	glucosaminyl (N-acetyl) transferase 1, core 2	2650
16656631	-0.0110013	0.993913	-0.437011	0.668867	0.307783	0.372451	-0.118227	0.856412	-0.912232	0.00112689	-0.271247	0.697422	-0.0632894	0.932312	0.577695	0.0358975	0.12881	0.854345	-0.242263	0.793536		10.9769	10.8356	10.8114	10.9774	10.8183	10.9205	9.81688	9.68048	9.85493	10.276	10.1553	10.183	10.625	10.4826	10.5323	10.566	10.4153	10.5054	10.502	10.5239	10.5791	10.5774	10.6384	10.6388	NM_182513 // ENST00000423327 // AK303266 // ENST00000293743 // ENST00000429831	SPC24	SPC24, NDC80 kinetochore complex component, homolog (S. cerevisiae)	147841
16651737	-0.550828	0.804672	0.450007	0.852134	-0.894843	0.224963	0.105993	0.948105	-0.912136	0.145558	0.231843	0.923047	-0.36815	0.769432	0.775828	0.238407	-0.0894396	0.963467	0.437253	0.851411		7.37744	7.04953	7.08285	7.36187	7.30891	7.29469	6.28731	6.60799	6.16028	6.43105	6.25625	6.43114	7.57	7.59113	7.81053	7.3784	7.69681	7.66706	8.46244	8.17582	8.14922	7.72245	7.74983	7.7964	NM_153235 // ENST00000358430 // AL834248 // ENST00000367652	TXLNB	taxilin beta	167838
16864393	0.0688395	0.924183	-0.0154049	0.986955	0.100073	0.667195	0.0158282	0.972694	-0.911653	3.83271e-06	-0.268528	0.363924	-0.153391	0.593583	0.489734	0.003263	0.378262	0.0549704	0.124798	0.837168		9.64978	9.58572	9.64148	9.7808	9.7473	9.78795	9.42032	9.29696	9.25904	7.73387	8.03398	7.88457	9.36527	9.63104	9.48785	9.10167	9.54327	9.52672	9.60166	9.61452	9.59501	9.34441	9.33762	9.36473	NM_001004317 // ENST00000345080 // DQ127228	LIN28B	lin-28 homolog B (C. elegans)	389421
16803562	0.0782594	0.877816	-0.144186	0.752644	0.0147289	0.949307	-0.207716	0.23601	-0.911557	1.21594e-07	-0.0676456	0.880044	-0.0764697	0.768066	0.767442	1.33712e-06	0.137341	0.534412	0.046142	0.940358		6.01356	5.68496	6.27338	6.03385	6.13266	6.31166	6.47281	6.2222	6.18217	8.81472	9.59693	9.49376	6.8594	7.11464	6.64511	6.34144	6.73489	6.79027	6.9758	6.65219	6.38903	6.5626	6.33169	6.22389	NR_029467 // NM_000655 // ENST00000236147 // M25280 // ENST00000463108 // ENST00000479657	SELL	selectin L	6402
17005894	0.0420344	0.952313	-0.118447	0.829138	0.339141	0.0420948	0.17866	0.433961	-0.9112	7.87543e-07	-0.724577	0.000128838	0.499299	0.00266931	0.685922	3.07626e-05	-0.0126579	0.979084	0.1475	0.730937		8.336	8.27242	8.16758	8.27751	8.21749	8.27538	8.64025	8.90642	8.85873	7.45149	7.13034	7.47345	8.22177	8.27195	8.41091	8.18351	8.43021	8.36407	8.47261	8.4836	8.38792	8.25515	8.17737	8.41683	NM_002518 // ENST00000335681 // BC051351 // ENST00000474550 // ENST00000486017 // ENST00000492373 // ENST00000495559	NPAS2	neuronal PAS domain protein 2	4862
16833533	-0.405148	0.676008	0.0676063	0.960795	-0.52432	0.101005	-0.0515664	0.94376	-0.91078	0.00112938	0.156741	0.867868	-0.209258	0.687053	0.858263	0.00215264	-0.338633	0.444815	-0.0235713	0.991904		10.8764	10.8486	10.7737	10.8763	10.952	10.8213	11.1993	11.1495	11.0737	10.1998	10.1052	10.0038	11.0646	10.9053	11.0322	10.852	11.0272	11.0188	11.189	11.075	11.1121	11.0697	10.9719	11.0881	NM_001010853 // ENST00000275072 // BC035036	PM20D2	peptidase M20 domain containing 2	135293
16719262	-0.0359702	0.937992	-0.0182751	0.974573	0.160196	0.190718	0.177891	0.200207	-0.910737	6.63176e-09	-0.211295	0.178649	-0.105305	0.543954	0.594136	2.47552e-06	0.173647	0.213119	-0.091854	0.787302		9.51875	9.53157	9.55522	9.64824	9.55573	9.68489	9.09467	9.16426	9.10633	8.83365	8.74704	8.72236	9.9973	9.58965	9.79473	9.85771	9.67614	9.84961	10.3787	10.2615	10.2267	10.1766	9.93304	10.0803	NM_058237 // NM_020958 // ENST00000304338 // ENST00000328839 // ENST00000393098 // BC068491	PPP4R4	protein phosphatase 4, regulatory subunit 4	57718
16708552	-0.0194681	0.960711	-0.0242583	0.951664	-0.00461261	0.976837	-0.00940283	0.967308	-0.909124	3.13756e-10	-0.167918	0.187655	-0.0104918	0.964758	0.730714	6.9066e-09	0.00303199	0.992745	-0.00284715	0.997027		8.20167	8.26141	8.12151	8.13537	8.17041	8.2339	7.89419	7.79888	7.77157	7.04506	7.09932	7.11045	8.19113	8.51328	8.32701	8.14	8.30134	8.41766	8.15553	8.16802	8.1507	8.28711	8.18749	8.23315	NM_001136493 // NM_032793 // ENST00000372809 // ENST00000372811 // BC011587 // ENST00000450641 // ENST00000420632 // ENST00000412699 // ENST00000434861 // ENST00000483824 // ENST00000480630 // ENST00000469745 // ENST00000491515 // ENST00000459917 // ENST00000481612	MFSD2A	major facilitator superfamily domain containing 2A	84879
16956980	0.0487711	0.970782	-0.114207	0.919761	-2.20438	4.84259e-08	-2.36736	1.95105e-08	-0.908997	0.000664738	0.970373	0.00290023	1.00016	0.000855009	2.87953	2.50461e-10	-1.43665	1.39181e-05	1.76789	4.20343e-06		7.3508	7.1709	7.1267	7.58829	7.48174	7.40466	6.76223	6.94938	7.08589	8.1938	7.74643	7.40166	6.47565	6.72159	6.92225	6.1429	6.92247	6.80082	4.4698	5.29788	4.74346	4.29648	4.62864	4.63446
16725984	0.0362749	0.96085	-0.014721	0.986602	0.14511	0.468568	0.0941137	0.772404	-0.908931	1.73334e-06	-0.102452	0.835757	-0.0551792	0.882114	0.7513	2.1201e-05	0.253972	0.230654	0.053683	0.943094		3.79661	3.82737	3.65918	3.76859	3.72251	3.55106	4.58487	4.52161	4.3838	6.15275	5.7132	5.31628	3.84849	3.82016	3.70676	3.76057	3.53144	3.63432	3.61228	3.60754	3.79379	3.27563	3.69015	3.59918	NM_013230 // L33930	CD24	CD24 molecule	100133941
16656589	-0.191938	0.882866	-0.0813171	0.959416	-0.128609	0.789099	-0.017988	0.984566	-0.905669	0.0042644	-0.0744821	0.957563	0.0947734	0.905914	0.92596	0.00391623	-0.370221	0.485609	-0.146839	0.920823		8.01368	7.81956	8.05962	7.96002	8.16588	8.07348	6.34742	6.0301	5.73922	6.49242	6.17524	5.5702	7.88706	8.19573	8.20123	7.76362	7.86785	8.13793	8.89748	8.9376	8.75893	7.38126	7.38434	7.43804
16945357	-0.00583786	0.995051	0.0167231	0.987515	0.313719	0.150639	0.33628	0.170983	-0.905578	1.84764e-05	-0.78677	0.000856502	-0.455592	0.0381202	-0.336784	0.0740042	0.520275	0.0149868	-0.249036	0.573427		8.46881	8.60653	8.7594	8.76974	8.81694	8.72905	8.19651	8.56259	8.58927	9.73837	9.90589	9.60415	8.14251	8.32946	8.21463	7.95575	8.03011	7.83903	6.47735	7.05863	7.00273	5.86378	7.06251	6.80527
16830914	0.00970438	0.986568	-0.0028983	0.996093	-0.0105161	0.955808	-0.0231188	0.930821	-0.905553	6.30402e-09	-0.134729	0.528776	-0.119828	0.460642	0.650997	6.4316e-07	-0.00473043	0.989488	-0.114042	0.68492		7.5602	7.23441	7.42251	7.52121	7.56076	7.4685	7.493	7.68373	7.46568	8.67558	8.75789	8.75895	7.93828	8.07138	8.08602	7.88184	7.97743	7.98601	8.08131	8.03001	7.89996	8.52999	8.58506	8.60757
16741287	0.0907451	0.883568	-0.0717245	0.910125	-0.181888	0.329517	-0.344357	0.0600334	-0.904042	1.34572e-06	-0.590547	0.00192054	-0.511271	0.00298365	-0.197776	0.217927	0.545995	0.00160302	0.216611	0.525247		11.1006	11.2432	11.1971	11.2691	11.2301	11.1896	11.1463	11.1354	11.1106	10.4025	10.1948	10.2389	11.1898	11.1509	11.1955	11.1468	11.1431	11.2119	11.2042	11.1717	11.1381	11.0086	10.9601	11.0083	NM_001159767 // NM_014038 // NR_027624 // ENST00000258761 // BC009597 // BC008453 // BC003056 // BC017794 // AK297496 // AK300655 // ENST00000436868 // ENST00000415365 // ENST00000433922 // ENST00000437745 // ENST00000446596 // AK027837 // ENST00000438834 // ENST00000432311 // ENST00000430000 // ENST00000480517 // ENST00000405202 // BC051898 // BC001570 // ENST00000407633 // ENST00000452975	BZW2	basic leucine zipper and W2 domains 2	28969
16870309	0.14596	0.85794	-0.0960497	0.910181	0.379194	0.106606	0.137185	0.737791	-0.903752	5.01683e-05	-0.776499	0.00222711	0.249767	0.428385	0.377021	0.0649815	0.00159811	0.998705	-0.127829	0.877038		10.4803	10.5697	10.4338	10.5302	10.5265	10.5248	10.6436	10.6478	10.5975	9.85177	9.6906	9.68079	10.4712	10.4219	10.4586	10.2828	10.4503	10.4172	10.5066	10.6005	10.5695	10.1342	10.2136	10.1803	NM_014800 // NM_130442 // NM_001039459 // ENST00000310758 // ENST00000448602 // ENST00000442504 // ENST00000361912 // ENST00000396040 // ENST00000396042 // BC114341 // AK291784 // AL136787 // AK296253 // AF398885 // BC003051 // BC064635 // BC077074 // AK301151 // ENST00000442573 // ENST00000341056 // ENST00000455879 // ENST00000420636 // ENST00000453399 // AK001084 // ENST00000445322 // ENST00000…	ELMO1	engulfment and cell motility 1	9844
16778355	0.0439361	0.91656	-0.0470313	0.908622	-0.422396	0.000271769	-0.513364	3.24832e-05	-0.903427	3.61017e-09	-0.011265	0.981857	-0.0739149	0.689919	0.818247	1.48718e-08	-0.284272	0.0112004	0.0642096	0.871514		8.73333	8.75923	8.7391	8.93056	8.78514	8.86404	8.65823	8.61192	8.74228	7.99182	7.91483	7.87497	8.68182	8.37706	8.47773	8.44737	8.48563	8.44266	8.99345	8.96131	9.05794	9.11619	8.99432	8.91002	NM_004240 // ENST00000313285 // AF502289 // ENST00000313244 // ENST00000394404 // ENST00000420690 // ENST00000475024 // ENST00000481339 // ENST00000465190 // ENST00000476297 // ENST00000490384 // ENST00000474015 // ENST00000462140	TRIP10	thyroid hormone receptor interactor 10	9322
16885189	-0.0388648	0.981166	0.0447746	0.979217	-0.148901	0.736949	-0.065262	0.935114	-0.903131	0.00287622	-0.517836	0.323928	-0.204198	0.72949	0.181097	0.627262	-0.41848	0.358906	-0.473776	0.450635		9.47011	9.30902	9.24623	9.42546	9.30844	9.51189	9.55052	9.73198	9.77146	9.45277	9.58177	9.61258	9.13395	8.96056	9.06324	8.98208	8.94926	8.97941	7.87923	8.41648	8.33795	7.24626	7.70688	7.78939	NM_001042771 // NM_005356 // ENST00000398345 // ENST00000373557 // ENST00000355928 // ENST00000336890 // BC013200 // ENST00000373562 // ENST00000333070 // ENST00000373564 // ENST00000436824 // ENST00000469765 // ENST00000461712 // ENST00000482949 // ENST00000495610 // ENST00000476457 // ENST00000477031 // ENST00000469956	LCK	lymphocyte-specific protein tyrosine kinase	3932
16797494	0.132444	0.838052	-0.153277	0.801427	0.303462	0.118488	0.017741	0.969978	-0.903075	5.02585e-06	-0.264407	0.390358	0.0218437	0.963585	0.660512	0.000214575	0.229777	0.362296	-0.0518423	0.948894		4.73915	4.10412	4.59601	4.8508	3.94404	4.79796	5.03323	4.83708	4.37783	4.63115	4.00408	4.55476	7.69832	7.46609	7.81971	7.06756	7.51592	7.21253	8.08741	7.85156	8.02566	7.72604	7.75491	7.89155
17071669	0.220821	0.733862	-0.093137	0.906658	0.632019	0.00383047	0.318061	0.226361	-0.90293	2.72485e-05	-0.284242	0.440377	0.825321	0.000256361	1.44401	6.57611e-08	0.287112	0.296188	0.480413	0.0928721		10.3795	10.398	10.2462	10.3922	10.4294	10.3508	10.4228	10.5238	10.4572	9.77741	9.60902	9.64041	10.6521	10.6008	10.4832	10.5462	10.578	10.4974	10.617	10.7051	10.5814	10.6667	10.5927	10.5992	NM_015440 // ENST00000367321 // AY374130 // BC136685 // BC144368 // AB127387 // BC008629 // AY374131 // ENST00000392243 // ENST00000367310 // AK127089 // BC144369 // ENST00000441122 // ENST00000367308 // ENST00000367307 // ENST00000420192 // ENST00000425276 // ENST00000443074 // AK315378 // AK310342	MTHFD1L	methylenetetrahydrofolate dehydrogenase (NADP+ dependent) 1-like	25902
16912140	0.0796254	0.758736	-0.0464743	0.872732	0.110136	0.21683	-0.0159635	0.935576	-0.902722	7.85522e-11	-0.348284	0.000275905	-0.0423359	0.786151	0.512102	2.31571e-07	0.0990269	0.389204	-0.0534451	0.849926		8.48531	8.31491	8.40558	8.58443	8.58936	8.49295	8.63214	8.7139	8.64265	7.51819	7.59422	7.46082	9.03154	8.69828	8.90061	8.83622	8.88665	8.88649	8.84884	8.76688	8.63397	8.68171	8.60019	8.65283	NM_152440 // ENST00000398055 // BC036246 // ENST00000311915	C12orf66	chromosome 12 open reading frame 66	144577
17092020	-0.0623905	0.898134	-0.133674	0.743701	-0.315594	0.0156135	-0.386878	0.0037256	-0.902071	3.62297e-08	-0.179068	0.402085	-0.280508	0.0387202	0.442495	0.000284006	-0.110331	0.60213	-0.0752443	0.871514		8.1823	8.0737	8.20352	8.48865	8.28529	8.3126	8.41665	8.26768	8.41755	7.2614	7.14338	7.27294	8.03949	8.0892	8.17456	8.28641	8.09688	8.14615	8.27405	8.34655	8.22738	8.06515	7.84193	7.93921	NM_001031737 // ENST00000293889 // AK128538 // ENST00000345165 // ENST00000439619 // ENST00000482878 // ENST00000481804 // ENST00000478979 // ENST00000479742 // ENST00000485091 // ENST00000463539 // ENST00000466708 // ENST00000460023 // ENST00000471861 // ENST00000482152 // ENST00000474647	CCDC78	coiled-coil domain containing 78	124093
17122120	-0.111221	0.879554	-0.232697	0.720642	-0.357536	0.089527	-0.479012	0.0252662	-0.899776	1.50736e-05	-0.150366	0.765451	-0.234701	0.39584	0.514709	0.00482945	-0.00966421	0.988115	0.113171	0.880082		8.18195	8.07863	8.12732	8.27593	8.11964	8.16053	8.3669	8.22195	8.35096	7.50531	7.30007	7.35945	8.01436	8.10433	8.085	8.06451	8.06476	8.05868	8.08093	8.09287	8.08885	8.03602	7.93193	7.97042	NM_016594 // NM_001143781 // NM_001143782 // ENST00000256680 // ENST00000444214 // ENST00000453172 // BC048292	FKBP11	FK506 binding protein 11, 19 kDa	51303
16882671	0.474316	0.702069	0.224991	0.874054	0.319419	0.502994	0.0700944	0.942886	-0.898323	0.0125712	0.0804153	0.960125	0.237588	0.742364	1.21633	0.00118453	0.769961	0.0864475	0.68813	0.296738		5.45227	5.26493	5.4465	5.37057	5.60628	5.34155	5.82824	5.96877	5.30313	8.32444	8.84597	8.83764	7.84113	8.00987	7.98188	7.90908	7.67997	7.46873	5.67278	6.10831	5.91277	6.55896	7.42314	7.05192
16687264	0.0412467	0.93668	-0.059349	0.89892	-0.0805451	0.608413	-0.181141	0.261546	-0.898171	3.81718e-08	-0.260254	0.115767	0.0535052	0.834589	0.691422	1.38975e-06	0.0128557	0.972246	0.146906	0.599373		5.74469	6.12447	5.61803	6.1378	5.49517	6.17377	7.53211	7.89649	7.87318	6.75681	7.12626	6.85406	8.30081	8.35156	8.3581	8.44401	8.26525	8.23756	7.96497	7.96023	7.88407	7.82218	7.7978	7.80426	ENST00000396517 // BC042133 // ENST00000487979 // ENST00000477506 // ENST00000480634	HEATR7B1	HEAT repeat containing 7B1	339766
16837052	-0.228875	0.885219	0.306126	0.83417	-0.485268	0.304703	0.0497333	0.963278	-0.897572	0.0180419	0.168635	0.908314	0.183772	0.830415	1.24998	0.00151879	-0.325566	0.667073	0.343474	0.787302		5.26912	5.17268	5.10673	5.28934	5.00124	5.41143	5.1367	5.06927	4.73041	5.12122	5.34242	5.08434	6.83598	6.88232	6.71936	6.8975	6.57507	6.539	6.93155	6.80132	6.84465	6.57438	6.72354	6.58484
16701106	0.183474	0.686798	-0.106384	0.835075	-0.0119253	0.962371	-0.301783	0.0651281	-0.897502	3.24721e-07	0.146457	0.642188	-0.483003	0.00166822	0.560957	0.00011863	0.50985	0.00100653	0.0387722	0.953476		7.50271	7.48902	7.33276	7.74579	7.32424	7.46949	7.22072	7.28389	7.22671	8.6918	8.52256	8.54953	7.57196	7.40375	7.45373	7.37871	7.19752	7.4124	7.33179	7.25024	7.23051	7.64392	7.54238	7.51013	NM_006385 // NM_198855 // ENST00000240731 // ENST00000347302 // BC018138 // ENST00000299871 // ENST00000391703	ZNF211	zinc finger protein 211	10520
16656423	0.132321	0.935897	-0.121823	0.94227	0.119848	0.830583	-0.134295	0.879838	-0.897441	0.0113328	-0.423725	0.598979	-0.240553	0.732009	0.233163	0.593727	0.448539	0.435066	0.0881374	0.965337		9.29333	9.17807	9.07339	9.29836	9.21276	9.2175	9.22733	9.14384	9.15102	9.10142	8.95216	9.01311	9.65703	9.70216	9.68241	9.73536	9.62974	9.67643	9.59219	9.70704	9.67002	9.87937	9.98654	9.97427	NM_024758 // ENST00000375826 // BC005090	AGMAT	agmatine ureohydrolase (agmatinase)	79814
16654551	-0.180056	0.858846	0.350912	0.69893	-0.439451	0.132926	0.0915167	0.882975	-0.894309	0.000540695	-0.0981791	0.920247	-0.0300314	0.967149	0.766098	0.00253015	-0.0856819	0.901213	0.323738	0.593687		7.7719	7.70908	7.75014	7.88946	7.95491	7.93153	6.33772	6.92997	6.25138	6.61619	6.29093	6.61167	8.50484	8.22221	8.38627	8.39385	8.42716	8.39313	8.41761	8.50593	8.21965	8.45515	8.44312	8.40313	NM_001135663 // NM_003929 // NM_001135662 // NM_001135664 // ENST00000446390 // ENST00000414729 // ENST00000367139 // ENST00000437324 // ENST00000235932 // ENST00000367140 // BX647960 // ENST00000468887	RAB7L1	RAB7, member RAS oncogene family-like 1	8934
16918996	-0.0743739	0.8953	-0.00321845	0.996666	-0.161961	0.332457	-0.0908058	0.741195	-0.893784	3.71083e-07	-0.00736047	0.993378	0.207951	0.275594	1.09437	2.31247e-08	-0.130953	0.597073	0.238959	0.34596		6.44029	6.33687	6.44487	6.49435	6.40962	6.51971	6.93765	7.25992	7.1625	8.31249	8.3584	8.42077	7.34519	7.22508	7.31676	7.28341	7.17983	7.4019	7.76361	7.70166	7.7296	8.00705	7.79272	7.72224	NM_000456 // NM_001032386 // NM_001032387 // ENST00000394109 // ENST00000394115 // ENST00000266971 // ENST00000356124 // BC065193	SUOX	sulfite oxidase	6821
16784000	0.113093	0.865914	0.00300435	0.997485	0.373095	0.0449905	0.263006	0.242565	-0.893002	4.07397e-06	-0.109229	0.832262	0.245489	0.28671	1.02926	6.85849e-07	0.18062	0.516523	0.0530135	0.946415		8.07443	8.00731	8.05088	7.90654	7.90743	8.00728	7.2922	7.45138	7.51238	6.80409	7.09573	7.05975	9.62151	10.1804	9.97623	9.08763	9.8754	10.0209	9.40378	9.35962	9.36513	9.46042	9.49534	9.46411	NM_006851 // ENST00000266659 // AK304847 // ENST00000456650	GLIPR1	GLI pathogenesis-related 1	11010
17126192	-0.100861	0.827546	0.00591751	0.994586	-0.0606116	0.733297	0.0461673	0.877356	-0.892813	9.28333e-08	-0.0530647	0.908717	-0.0630049	0.811758	0.776744	6.44382e-07	0.00473532	0.992203	0.00234202	0.997818		8.65669	8.49404	8.43678	8.80787	8.70883	8.73811	8.86134	9.0086	8.95542	9.91047	9.8978	10.0017	8.94145	8.87034	8.90223	8.90582	8.8297	8.89357	8.85803	8.94802	8.75552	8.98054	8.9795	8.85833	NM_014853 // NM_001098509 // ENST00000268989 // ENST00000426855 // BC039204 // AB275762 // AB449878 // AK294955 // AK304263 // ENST00000424187 // ENST00000447805 // ENST00000397207 // AK124883 // AK125203 // CR596157	SGSM2	small G protein signaling modulator 2	9905
16654771	0.063413	0.93712	-0.177418	0.786376	0.264425	0.212693	0.0235944	0.961739	-0.892712	1.26014e-05	0.0435326	0.954633	-0.181917	0.542453	0.754328	9.91674e-05	0.315257	0.17983	-0.131084	0.843045		6.50707	6.754	6.88952	6.83898	6.90767	7.03849	5.86127	5.92081	5.72504	6.81533	7.03669	6.78705	7.23218	7.19938	7.15679	7.02111	7.16799	6.99871	7.42548	7.73848	7.5004	7.81042	8.15161	8.05156	NM_001174116 // NM_015263 // NM_001174117 // ENST00000251076 // ENST00000449909 // AF389880 // ENST00000436119	DMXL2	Dmx-like 2	23312
16738628	0.0386708	0.976604	-0.0394679	0.978043	-0.740442	0.00862661	-0.818581	0.00452064	-0.892505	0.000509691	-0.130671	0.882164	0.165699	0.732495	0.927533	0.000390753	-0.993295	0.000591963	-0.0871542	0.942972		9.75829	9.75768	9.95075	9.81931	9.89705	9.83217	10.2347	10.4146	10.2554	10.6866	10.5744	10.5139	9.82781	9.60789	9.82435	9.92868	9.77152	9.79845	9.88895	9.79866	9.79513	9.49707	9.37229	9.47647	NM_207585 // NM_000874 // NM_207584 // ENST00000404220 // ENST00000382241 // ENST00000342136 // ENST00000382264 // L41944 // L41942 // U29584 // AK293059 // L41943 // CR541817 // BC002793 // ENST00000382238 // ENST00000444089 // ENST00000318433 // ENST00000417007 // ENST00000423152 // ENST00000435704 // ENST00000432231 // ENST00000420068 // ENST00000451624 // ENST00000342101 // CR596140 // ENST00…	IFNAR2 // IL10RB	interferon (alpha, beta and omega) receptor 2 // interleukin 10 receptor, beta	3455 // 3588
17012707	-0.295906	0.651629	-0.17932	0.7861	-0.177277	0.439657	-0.0606913	0.892664	-0.890381	1.42995e-05	-0.211709	0.597067	-0.0107541	0.984516	0.667918	0.000394233	-0.273839	0.282002	-0.107316	0.885595		6.8971	6.98336	6.78824	7.24271	7.18933	7.33308	6.79932	6.83995	6.88399	8.08738	8.23594	7.91671	6.6881	6.50938	6.33526	6.2328	6.89099	6.57519	5.48438	5.79866	5.30001	5.35264	5.94373	5.82256
16656627	0.234871	0.875924	-0.163597	0.92043	0.339139	0.487593	-0.0593287	0.952868	-0.889753	0.0161566	-0.179178	0.897105	0.126847	0.890099	0.837421	0.0251643	0.170676	0.85945	-0.0416161	0.988542		7.99394	7.96454	7.99036	7.98821	7.98313	8.04149	8.60438	8.69274	8.70045	7.93632	7.86015	7.7629	8.23321	8.23182	8.18248	8.337	8.22695	8.17933	7.75675	7.76613	7.75041	7.62461	7.54159	7.47985	NM_001142287 // NM_006378 // ENST00000420987 // ENST00000450295 // ENST00000438547 // ENST00000356444 // ENST00000422704 // ENST00000343780 // BC054500 // AK293749 // AK316107 // U60800 // BC137515 // BC137518 // AB210030 // ENST00000339861 // ENST00000429836 // AK090804 // AK128342 // ENST00000420681 // ENST00000420101 // AK091601 // ENST00000418828 // ENST00000433650 // ENST00000475255 // ENST0…	SEMA4D	sema domain, immunoglobulin domain (Ig), transmembrane domain (TM) and short cytoplasmic domain, (semaphorin) 4D	10507
16966285	0.00850907	0.987538	-0.00897463	0.986602	-0.0338606	0.815616	-0.0513443	0.804199	-0.889572	2.69095e-09	-0.0265485	0.945173	0.00585355	0.983848	0.868877	3.62766e-09	0.0720015	0.712959	0.111716	0.651407		3.99146	4.12713	3.95218	4.0351	3.91224	4.35512	3.85584	4.34695	4.14932	4.13183	4.16673	4.0727	4.83802	5.33285	5.02835	4.41159	4.6646	4.92043	6.54875	6.45092	6.26615	6.13628	6.2947	6.14071
17124130	-0.158365	0.685868	-0.145296	0.726321	-0.195095	0.149109	-0.182027	0.261507	-0.889299	4.55014e-08	-0.0790441	0.826332	0.0910309	0.671128	0.901286	3.89572e-08	-0.357578	0.00655613	-0.0714527	0.880687		8.74215	8.62425	8.67444	8.83307	8.8236	8.84639	8.77901	8.96262	8.92936	10.1333	9.9718	10.0579	9.32651	9.11534	9.11791	9.34933	9.10873	9.15171	9.28379	9.18573	9.07313	9.53634	9.42725	9.48959	NM_022373 // ENST00000396081 // ENST00000311350 // AK055708	HERPUD2	HERPUD family member 2	64224
16868619	0.0790625	0.872182	0.0393816	0.942782	0.406411	0.00252078	0.366731	0.00718768	-0.88924	6.01073e-08	-0.414611	0.00505284	0.489865	0.00037016	0.964494	1.9562e-08	0.0535785	0.85899	0.137033	0.662144		10.1906	10.2698	10.0833	10.2208	10.26	10.1837	10.4448	10.5467	10.4856	11.2821	11.2135	11.2485	10.6076	10.6211	10.5256	10.6127	10.5685	10.5354	10.5414	10.4873	10.4499	10.3818	10.4728	10.3628	NM_002227 // ENST00000342505 // AB219242 // ENST00000465376 // ENST00000471473	JAK1	Janus kinase 1	3716
16848961	0.120361	0.822528	0.02104	0.979385	0.167075	0.350761	0.067754	0.836476	-0.889015	9.09509e-07	-0.174211	0.583096	-0.139677	0.570287	0.575127	0.000192214	0.364689	0.0297204	0.0579367	0.933848		7.87324	8.04912	8.37603	8.57387	8.38121	8.51062	8.64197	9.10832	9.29905	9.37915	9.56682	9.88255	8.93076	8.9911	8.97218	8.95985	9.03798	9.03452	6.69272	6.78816	6.93907	6.6142	7.17652	7.31476
16991125	0.0013192	0.997333	-0.0547697	0.872313	0.259732	0.00814661	0.203643	0.0504468	-0.888938	8.0075e-10	-0.225539	0.0515979	0.134977	0.265853	0.798376	3.57363e-09	0.0883593	0.568481	-0.0363955	0.929981		6.99783	7.24188	6.98919	7.23561	7.3422	7.00544	8.39906	8.47031	8.50054	7.72449	7.84458	7.87513	7.68895	7.47626	7.52507	7.43678	7.47145	7.5663	7.52198	7.55516	7.59796	7.51905	7.38455	7.48004	NM_003307 // ENST00000397928 // ENST00000300482 // AB001535 // ENST00000300481 // ENST00000431901	TRPM2	transient receptor potential cation channel, subfamily M, member 2	7226
16654363	0.150668	0.937692	-0.31878	0.848607	0.0997229	0.88903	-0.369726	0.637515	-0.888871	0.03497	-0.15771	0.925413	-0.539873	0.410936	0.191288	0.730667	0.447276	0.55341	-0.192321	0.922939		5.76208	5.91108	5.54487	5.53658	6.00929	5.76482	7.7217	8.02975	8.14359	6.77714	6.5929	6.60116	5.97374	5.97099	5.74352	5.80767	5.89742	5.91306	5.99566	5.82355	5.84264	6.20193	5.85838	6.38812	NM_198565 // ENST00000328557 // AY358322 // ENST00000461791	LRRC33	leucine rich repeat containing 33	375387
17056740	0.0325544	0.934692	-0.067138	0.843528	-0.0440443	0.728228	-0.143737	0.229902	-0.888607	8.94019e-10	-0.3828	0.000569849	-0.0708011	0.658293	0.435006	1.51003e-05	0.135052	0.272168	0.108295	0.620471		8.36156	8.25895	8.32086	8.36221	8.27566	8.34169	8.33975	8.31156	8.2779	9.31712	9.19342	9.27899	8.49886	8.74813	8.61296	8.70335	8.56332	8.74066	8.4494	8.46886	8.49125	8.92579	8.99976	8.91384	NM_031215 // ENST00000279101 // ENST00000370560 // ENST00000453274	CABLES2	Cdk5 and Abl enzyme substrate 2	81928
16718903	0.00141569	0.997091	-0.0278303	0.944998	0.0141089	0.92412	-0.0151371	0.946343	-0.888066	6.21041e-10	-0.15591	0.266387	0.0753495	0.616681	0.807506	2.26594e-09	-0.111593	0.396	-0.0503524	0.887316		7.7075	7.7263	7.59325	7.70355	7.71836	7.67434	8.062	8.02982	7.99968	6.99804	7.03543	6.96109	7.53333	7.30473	7.27581	7.51445	7.3592	7.32121	7.28631	7.39797	7.24428	6.94312	6.95554	6.87249	NM_001136017 // NM_001760 // NM_001136126 // NM_001136125 // ENST00000372991 // ENST00000372988 // ENST00000511642 // ENST00000415497 // ENST00000414200 // AK055519 // ENST00000505064 // ENST00000508143 // ENST00000502771 // ENST00000505672 // ENST00000513956 // ENST00000511686 // ENST00000510058 // ENST00000505884 // ENST00000506555 // ENST00000514382 // ENST00000511161 // ENST00000512381	CCND3	cyclin D3	896
16889154	0.0183235	0.976604	-0.0644535	0.890353	0.118312	0.432723	0.0355348	0.906414	-0.887002	6.46075e-08	-0.117375	0.691744	0.0231904	0.942303	0.792817	3.11057e-07	0.185063	0.264086	0.0899418	0.836158		9.18608	8.95467	9.00375	9.24613	9.05761	9.22409	9.19992	9.10584	9.11419	8.03374	7.71178	7.81751	9.23383	9.26867	9.10929	9.27765	9.07917	9.23576	9.12946	9.17957	9.14457	8.88366	8.72255	8.68441	NM_175039 // NM_175040 // ENST00000335791 // ENST00000343609 // BC036705 // ENST00000495983 // ENST00000467674 // ENST00000474282 // ENST00000479747	ST6GALNAC4	ST6 (alpha-N-acetyl-neuraminyl-2,3-beta-galactosyl-1,3)-N-acetylgalactosaminide alpha-2,6-sialyltransferase 4	27090
17118826	-0.0987634	0.935346	-0.166513	0.872712	-0.0355003	0.940702	-0.10325	0.874068	-0.886221	0.00108819	-0.395593	0.439358	-0.0681892	0.922537	0.422439	0.124251	0.0780112	0.918638	0.0453223	0.978913		10.4029	10.2973	10.361	10.4198	10.3362	10.3139	10.4824	10.5423	10.5563	11.3846	11.2514	11.3525	10.5621	10.3998	10.4456	10.3573	10.4746	10.4929	10.6079	10.5196	10.4729	10.467	10.3986	10.4176	NM_178454 // ENST00000286692 // AL833098 // ENST00000484310 // ENST00000496430 // ENST00000462092 // ENST00000463682 // ENST00000480600 // ENST00000461449 // ENST00000490780 // ENST00000477588 // ENST00000477769	DRAM2	DNA-damage regulated autophagy modulator 2	128338
16732037	0.189941	0.782221	0.0219922	0.984773	0.803212	0.000405895	0.635263	0.00456778	-0.886044	3.67843e-05	-0.517066	0.0428172	-1.23582	1.9867e-06	-0.866839	5.27089e-05	1.24566	1.85638e-06	-0.793367	0.00157912		8.61547	8.67053	8.60737	8.64709	8.65815	8.65345	8.6986	8.74395	8.61953	7.73755	7.59412	7.48218	8.42848	8.32623	8.46301	8.18702	8.49164	8.3523	8.65622	8.56432	8.61108	8.49211	8.45429	8.4044	NM_001039569 // ENST00000396654 // ENST00000443700 // AK299026 // BC021898 // BC009606 // AF393369 // ENST00000415298 // ENST00000446015 // ENST00000334271 // ENST00000323968 // ENST00000423110 // ENST00000444408 // ENST00000409375 // ENST00000396653	AP1S3	adaptor-related protein complex 1, sigma 3 subunit	130340
16654525	0.156645	0.915025	-0.296782	0.812021	-0.000640391	0.999239	-0.454067	0.381989	-0.884448	0.00887694	-0.2717	0.781738	0.0365438	0.970594	0.649292	0.0598718	-0.253031	0.725889	-0.215847	0.877266		6.89311	6.68455	6.58723	7.43002	7.26385	7.30343	6.6218	6.49523	6.38999	7.848	7.71985	7.28238	6.44963	6.35511	6.74854	6.2654	6.52811	6.07394	4.93429	5.38364	5.35695	4.79496	4.49021	5.32975	ENST00000446346	TRAC	T cell receptor alpha constant
16654317	-0.124683	0.904265	0.010495	0.99469	-0.233528	0.455468	-0.0983495	0.867472	-0.884176	0.000451728	-0.0082682	0.995846	-0.139909	0.782288	0.735998	0.00276587	-0.0866035	0.895626	0.00701484	0.99707		6.63713	6.42398	6.22772	6.53021	6.23313	6.34874	6.72364	6.5986	6.5806	8.63229	8.41981	8.26445	6.07119	5.86266	5.75144	6.24954	5.96432	6.12976	6.09788	5.89718	6.362	6.50746	6.64291	6.47961	NM_014795 // NM_001171653 // NR_033258 // ENST00000303660 // ENST00000409487 // AB056507 // BC127101 // BC127102 // AK294928 // AB193095 // AB193096 // ENST00000427902 // ENST00000435262 // ENST00000392861 // BC035706 // ENST00000409211 // ENST00000434448 // ENST00000453352 // ENST00000392860 // ENST00000444559 // ENST00000435831 // ENST00000465308 // ENST00000470879 // ENST00000465070 // ENST000…	ZEB2	zinc finger E-box binding homeobox 2	9839
16656825	-0.314666	0.732178	-0.155571	0.883795	0.247258	0.481469	0.406352	0.295939	-0.884149	0.00126352	-0.210843	0.788518	0.26384	0.567258	0.937146	0.000808513	-0.250606	0.622545	-0.234023	0.797706		9.46098	9.45559	9.51984	9.6535	9.54062	9.5158	9.34445	9.46406	9.45727	8.94784	8.93141	8.92748	9.82423	9.94283	9.97052	9.89604	9.93289	9.96937	9.7703	9.72595	9.78906	9.73924	9.72335	9.75689
17125034	-0.0326328	0.968842	0.031883	0.971365	0.365892	0.0558691	0.430407	0.028952	-0.883961	6.44115e-06	-0.0162265	0.985918	0.477822	0.0123929	1.34556	2.43666e-08	0.0958942	0.808235	0.207824	0.619412		9.91641	10.2775	9.9451	10.0613	10.1335	10.0842	9.75372	10.1306	9.84314	7.85875	8.25437	8.13527	10.4399	10.1172	9.81001	10.118	10.1358	9.96587	10.355	10.3299	10.1809	10.1053	10.0653	10.0593	NM_014331 // ENST00000280612 // AK290359 // ENST00000509248	SLC7A11	solute carrier family 7, (cationic amino acid transporter, y+ system) member 11	23657
16683551	0.137816	0.768278	0.0013692	0.998492	0.650203	6.74418e-05	0.513756	0.00102084	-0.883613	3.54845e-07	-0.424956	0.0117783	0.0442809	0.891995	0.502937	0.000345738	0.29228	0.0700069	-0.313642	0.12564		7.54891	7.30089	7.23636	7.87293	7.52526	7.68397	7.5666	7.69265	7.54942	6.22533	5.97886	6.28998	7.71004	7.79986	7.76701	7.38174	7.55844	7.76244	7.98362	8.26776	8.00241	7.84008	8.00422	7.76758
17061504	-0.0107417	0.987068	0.0453257	0.931283	-0.0138341	0.947196	0.0422333	0.882243	-0.882973	4.83369e-08	-0.140992	0.575274	0.113187	0.563767	0.855169	7.84811e-08	0.0636914	0.818276	0.190713	0.399918		10.3591	10.4064	10.3353	10.3732	10.4439	10.4657	10.2935	10.3749	10.3088	9.58856	9.70881	9.72793	10.6206	10.6792	10.6009	10.7897	10.6771	10.6867	10.599	10.6726	10.7163	10.4768	10.7146	10.6419	NM_004911 // ENST00000286091 // BC011754 // ENST00000466592	PDIA4	protein disulfide isomerase family A, member 4	9601
16815276	0.0126897	0.976604	0.0517443	0.872313	-0.0274212	0.83061	0.0116334	0.958958	-0.882305	4.4322e-10	0.0954951	0.608079	-0.0815888	0.559711	0.896212	3.2317e-10	0.0129554	0.959814	-0.0412122	0.911364		7.59362	7.39254	6.97027	7.05421	7.18506	7.06141	5.49553	5.38962	5.58816	5.51331	5.94268	5.65698	5.1583	5.16112	4.7421	5.32421	5.17992	5.0758	4.91964	5.2047	5.18945	5.08461	5.12014	5.11474	NM_001004320 // ENST00000342526 // BC108676 // ENST00000456831	TMEM195	transmembrane protein 195	392636
16926200	-0.0242874	0.973833	-0.0932921	0.867914	0.478291	0.0032944	0.409286	0.0137006	-0.881928	8.97621e-07	-0.429225	0.0188254	-0.0284033	0.941814	0.4243	0.00321723	0.399282	0.0148576	-0.107413	0.838579		8.57476	8.44576	8.50274	8.6515	8.42469	8.62658	8.10242	8.39498	8.15802	9.91719	9.96422	9.92942	8.85409	8.54643	8.37073	8.56599	8.37067	8.46204	8.61395	8.88385	8.45823	8.523	8.35523	8.539	NM_005204 // ENST00000263056 // ENST00000375328 // ENST00000375321 // BC104833 // BC113566 // D14497 // CR542284 // AK290320 // Z14138 // ENST00000430603 // ENST00000415139 // ENST00000375322 // ENST00000413724 // CR619928	MAP3K8	mitogen-activated protein kinase kinase kinase 8	1326
16669785	0.0413172	0.965423	-0.0610449	0.947655	0.175928	0.491543	0.0735655	0.879291	-0.881253	4.75591e-05	-0.337311	0.319253	-0.133281	0.727833	0.410662	0.0364006	-0.232668	0.471755	-0.541876	0.0507814		6.10296	5.73767	6.1489	6.33136	6.18921	6.17279	6.67456	6.56928	6.4537	7.52496	7.13854	7.09609	7.16538	7.46786	7.58247	7.23416	6.95871	6.71403	8.5802	8.82106	8.7438	9.42177	9.36492	9.23418
16867868	0.00656529	0.989827	-0.0585713	0.874179	0.196984	0.0747062	0.131847	0.356711	-0.881204	3.76338e-09	-0.341271	0.00456018	0.126223	0.381585	0.666156	1.93912e-07	0.291295	0.00771317	0.220534	0.140124		6.01466	6.08541	6.17022	5.97965	6.17171	5.91744	7.2615	7.24908	7.35274	7.74366	7.7235	7.77011	7.39606	7.2346	7.29399	7.34797	7.10547	7.23535	7.5074	7.50052	7.46361	7.51109	7.68605	7.53233	NM_014698 // ENST00000366835 // BC030245 // ENST00000436966 // ENST00000474478 // ENST00000496025 // ENST00000487971 // ENST00000483779 // ENST00000487817	TMEM63A	transmembrane protein 63A	9725
16655085	-0.0801282	0.973833	0.345345	0.852033	-0.74795	0.179081	-0.322477	0.733509	-0.880772	0.0595846	-0.0419174	0.988043	0.137818	0.907821	0.976673	0.0380865	-0.262171	0.816995	0.623597	0.579144		6.47745	6.4482	6.45779	6.81688	6.65314	6.62662	6.30819	6.40912	6.44085	7.45279	7.47715	7.27306	8.20472	7.9619	7.9586	7.86223	7.90068	8.02497	8.06258	7.84624	7.63572	8.32926	8.10809	8.27189	NM_080876 // NM_001142314 // ENST00000354221 // ENST00000342619 // BC035000 // ENST00000469344	DUSP19	dual specificity phosphatase 19	142679
16890970	0.0533977	0.912566	0.0712108	0.872313	-0.0603713	0.712962	-0.0425581	0.879204	-0.880427	4.24016e-08	-0.192225	0.332553	-0.0819079	0.705862	0.606294	6.54374e-06	0.0443622	0.88241	0.0228255	0.972834		7.63603	7.57335	7.53701	7.48408	7.6114	7.50777	7.33083	7.40348	7.22184	8.37986	8.48319	8.56751	8.10579	7.84393	7.96852	7.88148	7.82399	7.87041	7.86516	7.71012	7.63053	8.22052	8.07764	8.25613	NM_014297 // ENST00000292147 // BC008250	ETHE1	ethylmalonic encephalopathy 1	23474
16656005	0.0363049	0.989046	0.0301818	0.992878	0.0976446	0.908853	0.0915215	0.943958	-0.880337	0.0711354	-0.160482	0.933933	-0.634351	0.393799	0.0855031	0.905026	0.695828	0.336081	-0.0361675	0.993333		7.09286	7.43367	7.22068	7.36349	7.28578	7.34644	7.63115	7.77256	7.50018	5.63051	6.07264	5.75703	8.04011	8.57846	8.42596	7.75386	8.49806	8.39539	8.10711	8.15667	8.03413	8.39875	8.34642	8.07244	NM_024902 // ENST00000357435 // ENST00000395069 // AK055747	DNAJC22	DnaJ (Hsp40) homolog, subfamily C, member 22	79962
17121352	0.088635	0.833388	-0.0412484	0.934373	1.25428	6.42027e-10	1.12439	3.55201e-09	-0.878513	2.78e-08	-0.561123	9.06111e-05	-0.228366	0.0936811	0.0890244	0.486225	1.69825	3.92707e-12	0.215613	0.26106		7.49385	7.34837	7.50497	7.69315	7.38924	7.48603	7.2163	7.28431	7.17765	7.75262	7.90306	7.6957	5.91109	5.9078	5.91314	5.74056	5.83833	6.11942	5.95272	5.10671	5.32661	5.65446	4.98828	5.13255	AK302574 // AK294941 // AK301562 // AK293825 // ENST00000291809 // ENST00000415705 // ENST00000425074 // ENST00000356584 // ENST00000450712 // ENST00000319969	ZNF772	zinc finger protein 772	400720
16656657	0.203555	0.862012	-0.0300095	0.985702	0.0608718	0.901073	-0.172693	0.775913	-0.877368	0.00232221	-0.0756904	0.949412	0.129734	0.840798	0.931411	0.00150159	-0.000401665	0.999582	0.0684607	0.966108		12.0641	12.0381	12.0583	12.0669	12.0973	12.1639	12.0218	12.0528	12.0495	11.3355	11.0871	11.2344	12.2448	12.3245	12.2835	12.2214	12.2965	12.306	12.1692	12.1678	12.2008	12.0905	12.0387	12.0309	NM_146388 // NM_015956 // NM_146387 // ENST00000393733 // ENST00000253099 // ENST00000307422 // BC009858	MRPL4	mitochondrial ribosomal protein L4	51073
16696504	-0.0578103	0.940934	-0.0795694	0.914109	0.0510753	0.853429	0.0293162	0.949174	-0.876873	1.07736e-05	-0.145244	0.758976	0.0127615	0.980309	0.744391	8.17426e-05	0.0133947	0.981377	-0.0249191	0.982395		12.1373	12.1628	12.1789	12.1678	12.181	12.1617	12.1515	12.1239	12.0804	11.4463	11.4157	11.3749	12.0297	12.1215	12.0343	12.0843	12.0964	12.0596	12.0354	12.1035	12.0333	11.8854	11.9869	11.9272	NM_001212 // ENST00000225698 // L04636	C1QBP	complement component 1, q subcomponent binding protein	708
16656857	-0.10061	0.979845	-0.171637	0.963739	-0.0902193	0.946628	-0.161246	0.934016	-0.875743	0.263342	-0.804006	0.644915	0.339655	0.838334	0.411392	0.656584	0.149297	0.948276	0.579171	0.830792		10.469	10.3299	10.3755	10.418	10.4066	10.3404	10.4443	10.3997	10.4371	9.34211	9.46603	9.38972	10.6379	10.932	10.7943	10.6692	10.7952	10.7905	10.4801	10.6187	10.5561	9.91518	10.0292	9.91842	NM_000626 // NM_001039933 // NM_021602 // ENST00000392795 // ENST00000006750 // ENST00000349817 // M89957	CD79B	CD79b molecule, immunoglobulin-associated beta	974
16790493	0.0878119	0.854665	-0.024303	0.969396	0.237969	0.0867926	0.125854	0.531463	-0.875486	9.71597e-08	-0.437746	0.00363906	0.0159059	0.962877	0.453646	0.000345738	0.23374	0.123605	0.0116768	0.99032		11.3271	11.3743	11.3318	11.3969	11.3899	11.3644	11.517	11.59	11.4979	11.4698	11.5676	11.4784	10.7862	10.7477	10.8656	10.7343	10.7622	10.8215	10.8186	10.6925	10.7145	10.7387	10.753	10.723	NM_002631 // ENST00000270776 // BC000368 // ENST00000377062 // ENST00000491493 // ENST00000465632 // ENST00000460189 // ENST00000477958 // ENST00000498356 // ENST00000483936 // ENST00000490057 // ENST00000496718 // ENST00000487775 // ENST00000493288	PGD	phosphogluconate dehydrogenase	5226
16744049	-0.0219247	0.962519	-0.128517	0.711904	0.0616357	0.654247	-0.0449563	0.842101	-0.875321	5.53464e-09	-0.1113	0.620543	0.0659347	0.729611	0.829957	1.19374e-08	0.00289953	0.994237	0.00719857	0.993333		5.93521	5.89409	6.15452	5.7935	5.80637	5.82759	5.70214	5.62206	5.73979	5.74078	5.43269	5.76324	6.82505	6.92719	6.82174	6.81834	7.0354	7.02733	7.22964	7.11375	7.07735	7.06047	6.81747	7.02866	NR_003930 // AL832706	LOC387647	patched domain containing 3 pseudogene	387647
16902052	-0.172338	0.786635	-0.142893	0.831451	-0.140595	0.553532	-0.11115	0.763493	-0.875152	1.61915e-05	-0.380821	0.149098	-0.252478	0.330725	0.241854	0.19808	0.234696	0.393692	0.122813	0.859298		5.6785	5.61229	5.63392	5.65665	5.56628	5.74735	5.25119	5.18322	5.16245	5.05682	4.92508	5.50264	6.274	6.03346	6.13217	6.34097	6.23657	6.22834	6.98232	7.21183	6.83277	6.80481	6.90889	6.71314	NM_023037 // ENST00000380250 // AK298021 // ENST00000380257 // ENST00000267067 // ENST00000380235 // ENST00000261575 // ENST00000380218 // ENST00000436046 // ENST00000477712 // ENST00000463566	FRY	furry homolog (Drosophila)	10129
16718622	-0.00265471	0.996093	-0.0765736	0.8711	0.562071	0.000104543	0.488152	0.000584771	-0.873892	9.61565e-08	-0.158292	0.527161	-0.10986	0.600932	0.60574	1.27999e-05	0.885766	2.80615e-07	0.213835	0.337815		10.6072	10.4943	10.6746	10.7058	10.5872	10.6541	9.78839	9.78067	9.96312	10.5222	10.2672	10.4724	11.2588	10.9865	11.1132	11.0463	11.0573	11.1669	11.3613	11.0678	11.2368	11.3244	11.2422	11.2358	NM_014508 // ENST00000361441 // ENST00000396752 // BC011739 // ENST00000396762 // ENST00000428892	APOBEC3C	apolipoprotein B mRNA editing enzyme, catalytic polypeptide-like 3C	27350
16838336	0.127613	0.724719	-0.0108804	0.985748	0.273458	0.0230103	0.134964	0.407173	-0.873832	1.73195e-08	-0.279272	0.0472122	-0.11986	0.480731	0.4747	5.27089e-05	0.281783	0.021244	-0.111534	0.71413		9.11194	9.02878	8.94581	9.11255	9.03094	9.0061	9.12673	9.11768	9.12549	8.07901	7.72623	7.77414	8.88476	8.90968	8.92354	8.55245	8.79488	8.82817	8.89152	9.10565	8.97917	8.75111	8.83228	8.82557	NM_145312 // ENST00000361807 // ENST00000374435 // BC014161 // ENST00000374437 // ENST00000430885 // ENST00000480678	ZNF485	zinc finger protein 485	220992
16672961	0.0530092	0.915025	-0.038066	0.944091	0.604391	2.99928e-05	0.513316	0.000221873	-0.873677	5.82758e-08	-0.176833	0.414962	-0.210642	0.159995	0.486202	0.000107094	0.662369	8.633e-06	-0.152664	0.579144		9.78031	9.71115	9.6239	9.80882	9.81911	9.68809	9.51592	9.53216	9.51334	10.6269	10.6279	10.6257	9.74878	9.64069	9.64678	9.82907	9.68535	9.57032	9.80207	9.70378	9.50251	10.1421	10.1644	10.0555	NM_005326 // NM_001040427 // ENST00000397356 // ENST00000262303 // ENST00000397353 // BC002627 // ENST00000455446	HAGH	hydroxyacylglutathione hydrolase	3029
16720771	0.104906	0.866519	0.104985	0.858225	-0.152984	0.427227	-0.152904	0.554394	-0.873069	2.16493e-06	-0.460664	0.0171748	-0.17537	0.466925	0.237035	0.128483	0.0728103	0.849677	0.0504238	0.945564		9.48842	9.54964	9.5689	9.55911	9.6351	9.66956	9.76973	9.75206	9.91847	9.01024	8.93794	8.92707	9.63755	9.56393	9.62952	9.55871	9.50563	9.67449	9.73233	9.73513	9.73193	8.90596	8.94308	8.8651	NM_020979 // ENST00000306803 // ENST00000444095 // AB000520 // ENST00000432527	SH2B2	SH2B adaptor protein 2	10603
16656535	-0.202945	0.889335	-0.361728	0.778978	-0.11913	0.827406	-0.277913	0.678008	-0.872882	0.0117548	0.128996	0.926102	-0.0192793	0.986368	0.982599	0.00535526	-0.428916	0.449763	-0.329065	0.76494		12.309	12.2829	12.2768	12.3925	12.4107	12.3129	12.443	12.5256	12.4636	11.4131	11.0549	11.0049	12.7509	12.4388	12.5483	12.7218	12.5823	12.5544	12.6589	12.5475	12.5622	12.4605	12.3753	12.4068
17118838	-0.128745	0.869196	-0.103394	0.889682	-0.100333	0.711943	-0.0749821	0.869862	-0.872319	3.27541e-05	-0.206625	0.640466	-0.153271	0.656913	0.512422	0.00654847	-0.048627	0.930741	-0.101565	0.901403		6.73431	6.24722	6.77732	6.71509	6.48163	6.64427	6.53511	6.73975	6.90073	9.12148	8.6857	9.05451	6.97359	7.12285	6.99425	6.73929	7.0409	7.3903	7.20415	7.14992	7.08283	8.7514	8.71429	8.79714
16981045	-0.0817674	0.957977	0.122918	0.934199	-0.407495	0.302684	-0.20281	0.761514	-0.872136	0.00632369	-0.133589	0.914633	-0.384367	0.450731	0.354179	0.317088	0.336395	0.555531	0.359522	0.68519		10.5265	10.362	10.3154	10.6026	10.505	10.4767	10.6667	10.5155	10.5049	9.64874	9.59343	9.46741	10.5	10.4774	10.4901	10.6537	10.5118	10.5696	10.4369	10.5273	10.546	10.2762	10.2322	10.2891	NM_004341 // ENST00000264705 // BC065510 // ENST00000475695 // ENST00000491891 // ENST00000479002	CAD	carbamoyl-phosphate synthetase 2, aspartate transcarbamylase, and dihydroorotase	790
16654733	1.23399	0.761628	0.273001	0.963236	-0.109704	0.960228	-1.07069	0.609963	-0.871893	0.512808	-0.119149	0.984715	-1.42914	0.434967	-0.676398	0.640564	1.23264	0.548896	-0.0867927	0.993333		6.28374	6.15038	6.15851	6.51392	6.28147	6.35659	4.61127	4.01789	4.00123	6.80285	6.6681	6.69496	5.14138	5.56097	5.67098	4.98895	5.21482	5.41551	3.10735	3.91377	2.97386	2.69803	3.75962	3.11746
17120052	0.125538	0.920231	-0.101382	0.940058	0.41003	0.242455	0.18311	0.761195	-0.871807	0.00276073	-0.267688	0.72728	0.367376	0.411211	0.971495	0.00115376	0.187383	0.773414	0.144729	0.911467		9.10565	9.02449	8.93113	9.07749	9.03237	9.03656	9.69575	9.7163	9.65502	9.94562	9.93486	9.88704	9.95039	9.99109	9.94646	9.82793	9.96264	9.91708	9.97639	10.0487	9.87056	10.1358	10.058	10.0247	NM_003760 // ENST00000400422 // ENST00000264211 // BC136643 // ENST00000374937 // ENST00000400415 // ENST00000374935 // ENST00000356916 // ENST00000374927 // ENST00000438975 // ENST00000411888 // ENST00000374933 // ENST00000400409 // ENST00000496705 // ENST00000463775 // ENST00000485722 // ENST00000476088	EIF4G3	eukaryotic translation initiation factor 4 gamma, 3	8672
16656575	-0.411088	0.685492	-0.0487456	0.976048	-0.240004	0.532022	0.122338	0.860119	-0.871355	0.00278455	0.0968788	0.933086	-0.0250839	0.977108	0.943149	0.00152685	-0.36452	0.432154	-0.1496	0.906324		10.8028	10.8272	10.7924	10.8534	10.9011	10.7656	10.9125	11.0036	10.9441	11.328	11.3481	11.3133	11.7351	11.5554	11.6555	11.5854	11.5773	11.5634	11.5187	11.5185	11.4692	11.4064	11.3772	11.4072	NM_003071 // NM_139048 // ENST00000310053 // ENST00000392912 // ENST00000494055 // BC044659 // ENST00000392913 // ENST00000472830	HLTF	helicase-like transcription factor	6596
16919206	-0.0259219	0.985341	-0.111377	0.918507	0.118695	0.74759	0.0332396	0.961773	-0.871054	0.000711244	-0.118805	0.897413	0.248456	0.56024	1.0007	0.000194988	-0.173902	0.750419	-0.0441411	0.97788		8.76723	8.70021	8.74335	8.94314	9.06773	8.91957	9.57284	9.859	9.77917	10.2079	10.1669	10.1951	9.4692	9.47407	9.44306	9.44403	9.45937	9.40298	9.66911	9.65765	9.57281	9.75201	9.75938	9.73151	ENST00000432870 // ENST00000462136	PPIP5K1	diphosphoinositol pentakisphosphate kinase 1
16850428	0.436116	0.834904	0.0758646	0.980501	1.44849	0.0188861	1.08823	0.112969	-0.870523	0.11134	0.690097	0.551538	2.27522	0.000342416	3.83584	1.5565e-07	-0.641465	0.474039	0.185272	0.944434		7.50913	7.79785	7.81866	8.01785	7.91444	7.75756	7.66842	8.06824	7.75954	6.92725	6.94867	6.57964	5.49762	5.17974	5.39373	5.67089	5.24648	5.1862	5.56388	5.71243	5.22849	5.53035	5.3152	5.66528	NM_006810 // NR_028444 // ENST00000316218 // D49490 // ENST00000448706 // ENST00000489923 // ENST00000393573 // ENST00000469649 // ENST00000495004 // ENST00000467157 // ENST00000472319	PDIA5	protein disulfide isomerase family A, member 5	10954
17088951	0.00268621	0.997382	0.121325	0.863041	-0.0438209	0.882943	0.0748182	0.861986	-0.870488	1.9573e-05	-0.158306	0.744346	-0.340089	0.140653	0.372093	0.0385356	0.18233	0.572195	-0.113938	0.876553		9.70787	9.59902	9.5507	9.7912	9.59807	9.64475	10.4271	10.4869	10.4067	10.4646	10.4884	10.4246	9.67549	9.50965	9.48397	9.75765	9.49858	9.40907	9.10159	9.27693	9.11901	9.47004	9.50408	9.46019	NM_198679 // NM_005312 // ENST00000372190 // ENST00000337036 // ENST00000372195 // ENST00000372189 // ENST00000266110 // BC041710 // D21239 // AK302763 // ENST00000437236 // ENST00000372191 // ENST00000357686 // ENST00000424467 // ENST00000431470 // ENST00000411834 // ENST00000398415 // ENST00000429421 // ENST00000414781 // ENST00000419442 // ENST00000427994 // DQ925684 // ENST00000438647 // DQ92…	RAPGEF1	Rap guanine nucleotide exchange factor (GEF) 1	2889
16912354	0.0289237	0.970483	-0.298731	0.63412	0.165559	0.390423	-0.162096	0.526512	-0.869402	2.72611e-06	-0.152482	0.691249	0.0578164	0.87258	0.774736	1.28826e-05	0.210259	0.364536	0.102517	0.867636		11.811	11.7116	11.6496	11.767	11.6343	11.6752	11.7568	11.7674	11.718	11.0023	10.9246	10.8198	11.653	11.6231	11.6564	11.6411	11.628	11.6301	11.7727	11.7298	11.7068	11.5789	11.5736	11.6511	NM_006303 // ENST00000223029 // U24169 // ENST00000415999	AIMP2	aminoacyl tRNA synthetase complex-interacting multifunctional protein 2	7965
16656637	0.012546	0.993618	-0.0612997	0.967942	0.230746	0.558689	0.1569	0.809861	-0.866133	0.00327938	-0.180761	0.854649	0.0613016	0.93951	0.746673	0.011145	0.200853	0.756541	0.0314089	0.989223		4.3399	4.27595	4.2873	4.44623	4.06047	4.7962	3.97017	4.15599	4.30395	6.8825	7.5186	7.03025	4.55287	4.77577	4.75505	4.59936	4.24112	4.47206	5.39751	4.73747	4.7351	5.02941	5.69044	5.38955	NR_002779	NUDT9P1	nudix (nucleoside diphosphate linked moiety X)-type motif 9 pseudogene 1	119369
17073527	0.0798176	0.865914	-0.0137173	0.983648	0.0816405	0.60209	-0.0118943	0.970728	-0.865176	6.14463e-08	-0.214372	0.252593	0.0976623	0.637199	0.748467	4.6261e-07	-0.085975	0.720266	-0.0699533	0.882829		10.7351	10.7098	10.7478	10.8128	10.6718	10.8046	10.7248	10.7271	10.7404	9.93371	9.7883	9.94721	10.7453	10.7842	10.7017	10.8165	10.6954	10.7625	10.6717	10.6869	10.6954	10.4704	10.3481	10.3521	NM_032627 // NM_001009998 // ENST00000270061 // ENST00000348495 // BC000274	SSBP4	single stranded DNA binding protein 4	170463
16779757	-0.325182	0.693202	-0.164502	0.863041	-0.228558	0.469937	-0.0678779	0.914309	-0.86379	0.000596276	-0.214672	0.745391	0.104603	0.850988	0.753721	0.00235825	-0.203227	0.674501	0.129934	0.902473		7.222	7.39016	7.24011	7.24577	7.21165	7.25876	7.77944	7.59082	7.78674	8.48104	8.24163	8.2708	7.57004	7.46721	7.45413	7.56184	7.60091	7.63929	7.76845	7.68458	7.7227	7.3451	7.30866	7.31474	BC089417 // ENST00000390626	IGHG1 // IGHV5-51	immunoglobulin heavy constant gamma 1 (G1m marker) // immunoglobulin heavy variable 5-51	3500
17069545	0.0478757	0.955328	-0.114026	0.871391	0.0382718	0.899567	-0.12363	0.730772	-0.863745	1.97396e-05	-0.131955	0.807378	0.0446963	0.924629	0.776487	7.54481e-05	-0.000910112	0.998882	0.00551433	0.997027		6.573	6.23316	5.8208	6.84644	6.17069	6.19	7.2092	7.39517	7.22488	8.94678	8.74998	8.43053	5.67865	5.87757	5.97054	5.36097	5.29112	5.70329	5.58571	6.21053	6.04841	5.50463	5.64705	5.93151	NM_025159 // ENST00000378962 // BC020611	CXorf21	chromosome X open reading frame 21	80231
16653549	-0.0347151	0.989671	-0.151302	0.94701	0.163745	0.826772	0.0471583	0.972324	-0.863	0.0715058	-0.12623	0.949507	-0.140597	0.907959	0.596173	0.24831	0.0843351	0.95414	-0.220007	0.921837		9.75874	9.6627	9.66343	9.9209	9.87974	9.8597	9.98695	10.0438	9.98999	9.0438	9.02944	9.01233	10.7597	10.3458	10.3369	10.7621	10.4847	10.3046	10.7709	10.6142	10.5596	10.6462	10.4671	10.5794	NM_133436 // NM_183356 // NM_001673 // NM_001178075 // NM_001178076 // NM_001178077 // ENST00000175506 // ENST00000394309 // ENST00000394308 // BC008723 // BC014621 // AK316224 // M27396 // AK302242 // BT007113 // AK302189 // ENST00000454046 // M15798 // ENST00000442734 // ENST00000414884 // ENST00000437657 // ENST00000448127 // ENST00000451771 // ENST00000487714 // ENST00000462436 // ENST0000049…	ASNS	asparagine synthetase (glutamine-hydrolyzing)	440
16874522	-0.00162751	0.997821	0.0558244	0.913075	0.0515462	0.772257	0.108998	0.613467	-0.862416	1.16308e-07	-0.383013	0.0116968	0.0136626	0.96906	0.493065	0.0001398	-0.0391092	0.906305	-0.0769928	0.875078		11.1187	11.1767	11.1381	11.0481	11.2218	11.1268	10.5174	10.5216	10.5325	9.3633	9.46396	9.53607	10.9865	10.9613	10.8371	10.8423	11.0627	10.8676	10.4057	10.5796	10.4663	9.92573	10.054	10.1178	NM_018351 // ENST00000343958 // ENST00000451107 // BC013319	FGD6	FYVE, RhoGEF and PH domain containing 6	55785
16650329	-0.000324031	0.99986	-0.0856822	0.944998	-0.136325	0.720544	-0.221683	0.649795	-0.862386	0.0012272	-0.220014	0.7619	0.137873	0.807771	0.780245	0.00327564	-0.189783	0.735033	0.0844148	0.948067		6.00159	6.46622	6.24018	6.08175	6.08948	5.97209	7.09187	7.06066	7.24385	4.00441	4.42172	3.69355	5.92975	6.11657	6.31738	5.68809	5.9681	5.57277	5.88431	6.69702	6.09218	4.47623	4.75346	5.26862
16884285	-0.177845	0.916324	0.521552	0.711438	-0.376675	0.460229	0.322722	0.664501	-0.860912	0.0271395	-0.118097	0.940353	-0.455826	0.471026	0.28699	0.541698	0.0526122	0.967418	-0.0265385	0.993333		9.15319	8.9178	8.87229	9.30794	9.31898	9.15513	8.78539	8.8571	8.84366	7.77539	7.86933	7.85782	9.20005	8.94726	9.01648	8.8873	9.03471	9.00634	9.30375	9.018	9.13855	9.09223	9.041	9.05266
17103560	0.0417408	0.915483	-0.0310916	0.94227	-0.0197089	0.899273	-0.0925413	0.556462	-0.86074	2.91747e-09	-0.458835	0.000120284	-0.1399	0.281309	0.262005	0.00451402	0.0813254	0.643719	-0.0388652	0.929139		6.54983	6.42426	6.44343	6.58847	6.4067	6.74732	5.85889	5.56685	5.69508	6.41802	6.19789	6.2622	8.30021	8.99154	8.70736	7.99199	8.65678	8.41084	8.01212	8.21421	8.04627	8.19746	8.23945	8.25818	NM_002758 // ENST00000359094 // U39657 // ENST00000435374	MAP2K6	mitogen-activated protein kinase kinase 6	5608
16656567	-0.356829	0.875722	-0.787295	0.69893	-0.0117517	0.990998	-0.442218	0.679404	-0.860515	0.129824	-0.0325942	0.992917	-0.187213	0.891697	0.640708	0.294627	-0.217834	0.883801	-0.393295	0.855561		9.42194	9.32416	9.26106	9.44468	9.24871	9.25377	9.20077	9.17772	9.0953	8.00724	7.9211	8.16255	9.10641	9.31274	9.15835	9.1256	9.22297	9.27781	8.90325	9.03921	9.05059	8.92266	8.95981	8.87381	NM_022082 // ENST00000370351 // AK074107 // ENST00000370349 // ENST00000411611 // ENST00000488738 // ENST00000459704 // ENST00000483113 // ENST00000487303	SLC17A9	solute carrier family 17, member 9	63910
16788046	0.110315	0.772603	-0.0354858	0.944998	0.115112	0.399163	-0.0306888	0.912396	-0.859076	3.09067e-08	-0.537849	0.000128546	0.23307	0.0785255	0.554296	1.1012e-05	0.193278	0.175437	0.311236	0.0382912		9.17291	9.0383	9.16105	9.18021	9.19085	9.19325	9.10348	9.06252	9.12061	9.95461	10.0037	9.96889	9.49049	9.57715	9.52854	9.27531	9.48888	9.4787	9.25531	9.20961	9.103	9.49362	9.48226	9.47938	NM_019005 // ENST00000340080 // ENST00000405785 // AK294561 // BC140833 // BC140834 // ENST00000434746 // AK096829 // ENST00000433056 // ENST00000445169 // ENST00000456533 // ENST00000493227 // ENST00000479694 // AL136892	MIOS	missing oocyte, meiosis regulator, homolog (Drosophila)	54468
16923332	0.124708	0.800459	0.0530659	0.932587	0.463198	0.00304727	0.391556	0.0140586	-0.858231	7.62524e-07	-0.0170486	0.979725	0.149486	0.503713	0.990668	1.13495e-07	0.611962	0.000179061	0.298249	0.178682		7.68668	7.72614	7.41537	7.9965	7.75423	7.7016	8.19276	8.17878	8.52362	9.8639	9.54697	9.47721	7.69941	7.56978	7.4247	7.57149	7.53158	7.5545	7.97507	7.8674	7.89572	7.90066	8.03962	8.00885
16991729	0.0445969	0.909811	0.000850144	0.998492	0.0234685	0.876836	-0.0202782	0.933144	-0.856769	3.26626e-09	-0.0861843	0.720691	0.376466	0.000456946	1.14705	4.65435e-11	0.033005	0.894882	0.386002	0.00129574		8.47521	8.27926	8.3501	8.45859	8.44567	8.51814	8.51465	8.43728	8.47837	8.15769	8.03225	8.119	8.99985	9.03192	8.92483	8.89827	8.94684	9.00603	8.95355	8.94039	8.96821	8.89993	8.92723	8.97249	NM_182922 // ENST00000405152 // ENST00000299192 // AK000725 // ENST00000401635 // ENST00000456734 // ENST00000483299	HEATR3	HEAT repeat containing 3	55027
16656529	-0.169777	0.905194	-0.430975	0.721403	-0.111355	0.832469	-0.372553	0.500415	-0.856618	0.0100058	0.00995191	0.996685	-0.194528	0.781433	0.672042	0.0470481	-0.138469	0.873919	-0.221642	0.871514		6.22729	5.9455	6.10834	5.79675	5.94756	5.84088	6.44157	6.91638	6.88948	7.67278	7.95414	7.64557	5.63097	5.72396	5.85716	5.97705	5.89816	5.75679	5.68991	5.81091	6.08118	5.73632	6.01365	5.9504	NM_004862 // NR_024320 // NM_001136472 // NM_001136473 // ENST00000339430 // ENST00000413364 // ENST00000405528 // AB034747 // ENST00000381810	LITAF	lipopolysaccharide-induced TNF factor	9516
16656665	0.0653162	0.968653	-0.0753911	0.964643	0.182765	0.702411	0.0420577	0.963658	-0.856331	0.00908995	-0.210694	0.847214	-0.0663703	0.941814	0.579267	0.0870342	0.177784	0.827093	-0.0713515	0.970611		9.39325	9.4079	9.34082	9.42014	9.42293	9.397	9.66683	9.84485	9.67405	10.5975	10.5999	10.4988	9.62643	9.49237	9.48747	9.4266	9.4291	9.34634	9.7421	9.7544	9.58274	9.70145	9.63795	9.60567	AK289402 // NM_138785 // ENST00000367419 // ENST00000367423 // ENST00000433539	C6orf72	chromosome 6 open reading frame 72	116254
16656625	0.381912	0.766866	-0.184303	0.901532	0.565523	0.194786	-0.000690926	0.999552	-0.855877	0.0178716	-0.338846	0.72601	0.177803	0.826946	0.694834	0.0605411	0.15976	0.86583	-0.22796	0.880203		5.69248	5.63146	5.44358	5.25538	5.68938	5.56371	6.25077	5.89236	6.15261	6.83623	6.81229	6.88547	5.61068	5.63185	5.51577	5.53823	5.49981	5.39814	5.49547	5.48521	5.45218	5.38914	5.45043	5.46029	NM_000507 // NM_001127628 // ENST00000415431 // ENST00000375326 // AK292199 // ENST00000414122	FBP1	fructose-1,6-bisphosphatase 1	2203
17074571	0.015069	0.979845	-0.0487002	0.919926	-0.0589767	0.712962	-0.122746	0.500181	-0.855632	4.55023e-08	-0.259371	0.0977422	-0.274215	0.0357323	0.322046	0.00394938	0.139969	0.427251	-0.0752693	0.86421		11.1022	11.1792	10.9217	11.017	11.0442	11.1078	11.0881	11.0466	11.0329	9.9992	9.99126	10.0176	11.0504	11.3201	11.1248	11.0585	11.1229	11.1425	10.9783	11.1878	11.1255	11.0336	11.0651	11.0892	NM_024640 // ENST00000373044 // AY286019	YRDC	yrdC domain containing (E. coli)	79693
16833689	0.0172755	0.976604	0.0966069	0.812021	-0.183997	0.15879	-0.104666	0.594591	-0.855515	4.57428e-08	-0.173753	0.399494	0.0612307	0.793385	0.742993	3.27266e-07	-0.151912	0.367041	0.0933156	0.806058		8.66998	8.72265	8.76706	8.93282	8.75736	8.78152	8.6379	8.65004	8.78287	9.67273	9.59365	9.72961	8.5816	8.59594	8.67877	8.51451	8.62127	8.57084	8.6965	8.51326	8.67921	8.69751	8.78525	8.81457	NM_018955 // ENST00000395837 // ENST00000302182 // ENST00000395839 // BC000379	UBB	ubiquitin B	7314
17049779	0.0855997	0.779815	-0.0307225	0.938502	0.0746772	0.50706	-0.041645	0.830852	-0.855008	1.31322e-09	-0.828418	1.92908e-08	-0.0802901	0.591878	-0.053701	0.610017	0.277767	0.00460473	0.1228	0.530513		12.091	12.0482	12.0418	12.1404	12.1028	12.118	11.9493	11.8671	11.9245	11.2104	11.2235	11.2038	12.0506	12.0514	12.0366	11.9448	12.0028	12.1014	12.0498	12.0031	12.053	12.0033	11.9253	11.8859	NM_012479 // ENST00000307630 // BC020963 // ENST00000453207	YWHAG	tyrosine 3-monooxygenase/tryptophan 5-monooxygenase activation protein, gamma polypeptide	7532
16892633	0.106517	0.912045	-0.0212151	0.986854	2.50776	9.55406e-10	2.38003	2.42255e-09	-0.854886	0.000292118	-0.128346	0.867741	0.169163	0.691819	0.895702	0.000202081	1.9382	3.38553e-08	-0.400398	0.341581		6.53386	6.48387	6.52507	6.46192	6.36051	6.57477	6.88377	6.88309	6.74516	6.56198	6.52331	6.45674	7.63339	7.53321	7.71883	7.7066	7.57601	7.678	7.42172	7.60362	7.57802	7.41372	7.34999	7.55333	NM_020716 // ENST00000322282 // AK127457 // ENST00000456860 // ENST00000450171	GRAMD1B	GRAM domain containing 1B	57476
16959505	0.207262	0.931468	0.193183	0.938502	-0.31014	0.687604	-0.324219	0.776538	-0.854701	0.117978	0.15052	0.946583	-0.836741	0.272356	0.168481	0.821239	0.395147	0.730999	-0.131454	0.965569		6.09079	6.25158	6.02275	5.47122	5.71641	6.20208	8.38633	8.5616	8.50936	7.92175	7.8999	7.85948	8.27965	8.06454	8.04577	8.45432	8.01396	7.99574	8.26656	8.27766	8.04952	7.93798	7.61815	7.58761	NM_016328 // NM_005685 // ENST00000265755 // AB209389 // ENST00000424337 // ENST00000489094	GTF2IRD1	GTF2I repeat domain containing 1	9569
16976158	-0.00779656	0.985962	-0.0289777	0.936237	0.0554125	0.612165	0.0342313	0.855972	-0.852759	4.46046e-10	-0.0927071	0.606081	0.065018	0.655726	0.82507	6.70629e-10	-0.0476743	0.796417	-0.0380688	0.915519		10.3401	10.3987	10.2579	10.3212	10.3332	10.2785	10.5056	10.6833	10.5476	11.5216	11.6441	11.5	10.5399	10.3119	10.393	10.5183	10.4505	10.3608	10.4493	10.4567	10.3993	10.5753	10.6457	10.5802	NM_006734 // ENST00000367603 // ENST00000367604 // ENST00000012134 // DQ231041 // ENST00000474532	HIVEP2	human immunodeficiency virus type I enhancer binding protein 2	3097
16656057	-0.834265	0.729654	-0.0228669	0.996015	-0.464922	0.638853	0.346476	0.828401	-0.852327	0.252819	0.636701	0.735968	-1.0552	0.298016	0.433827	0.618222	-0.0938298	0.967603	-0.684109	0.751665		11.7204	11.7711	11.7115	11.788	11.7091	11.7321	11.9766	11.8767	11.9538	11.1347	11.0579	11.2131	11.7341	11.7993	11.8019	11.8635	11.8111	11.8202	11.6988	11.6463	11.598	11.6651	11.5463	11.5384	NM_013416 // NM_000631 // ENST00000397147 // ENST00000248899 // ENST00000336951 // BC002798 // ENST00000439078 // ENST00000447071 // ENST00000439006	NCF4	neutrophil cytosolic factor 4, 40kDa	4689
16881660	0.0129955	0.987337	-0.0173595	0.982916	0.249166	0.131869	0.218811	0.276947	-0.852276	1.26816e-06	0.0209841	0.975008	0.126439	0.614746	0.999699	1.57336e-07	0.166192	0.478614	0.0434655	0.94937		8.23645	8.19705	8.24956	8.24099	8.33044	8.29872	8.2337	8.08804	8.25708	8.71427	8.6206	8.62607	8.00091	7.89696	7.95029	7.96672	8.02824	7.95619	7.74716	7.80827	7.77765	7.79346	7.82366	7.91167	NM_002719 // NM_178586 // NM_001161725 // NM_178587 // NM_001161726 // ENST00000334743 // ENST00000350249 // ENST00000445439 // ENST00000328724 // U37352 // ENST00000334756 // ENST00000422945	PPP2R5C	protein phosphatase 2, regulatory subunit B', gamma	5527
17043822	0.0493012	0.886142	-0.0115072	0.980554	-0.0015241	0.992225	-0.0623325	0.704141	-0.852008	8.94019e-10	-0.179001	0.14838	0.0405897	0.826386	0.713596	1.0791e-08	-0.0495225	0.799574	-0.00740869	0.991455		7.6614	7.32695	7.31486	7.92603	7.77798	7.84043	7.93114	8.19608	8.46904	9.57456	9.67628	9.74553	7.81168	7.68399	7.94789	7.40437	7.90077	7.9041	5.08304	5.90037	5.2566	4.68203	6.24706	5.96197
16767714	-0.0641027	0.952119	-0.0867442	0.931722	-0.300157	0.263326	-0.322799	0.316118	-0.851594	0.000252799	-0.469426	0.15402	0.428648	0.127791	0.810816	0.000471031	-0.554619	0.0319613	0.174186	0.829398		7.86589	7.92161	7.88661	8.02981	7.87001	8.07981	7.89224	8.05968	8.1027	8.95745	9.2739	9.29352	8.05655	7.95221	7.98066	7.88353	7.90566	7.96924	7.95065	7.97857	8.01695	8.2618	8.30905	8.20396	NM_006084 // ENST00000396864 // M87503 // ENST00000324076	IRF9	interferon regulatory factor 9	10379
17061467	0.0555208	0.890202	-0.0381287	0.930838	0.0910092	0.466042	-0.00264039	0.993074	-0.851457	6.7305e-09	-0.105267	0.642188	0.117425	0.437633	0.863615	5.65539e-09	-0.0930278	0.600127	-0.0666121	0.859298		10.0916	9.96117	9.95221	10.1427	10.0437	10.0627	10.1589	9.97541	10.0177	8.94562	8.68909	8.51771	10.0561	10.2121	10.0772	10.2256	10.1454	10.1445	9.89705	9.88778	9.89922	9.73173	9.51047	9.4187	NM_152345 // ENST00000394859 // BC032554 // ENST00000361220 // ENST00000487527 // ENST00000488766 // ENST00000493506	ANKRD13B	ankyrin repeat domain 13B	124930
16850286	-0.170857	0.796232	-0.0598798	0.944265	1.70319	1.10255e-08	1.81416	5.25535e-09	-0.850941	2.92394e-05	-0.501423	0.0352698	0.731469	0.000536963	1.08099	1.65808e-06	0.310616	0.203538	-0.661101	0.00541897		8.31875	8.86418	8.71215	8.63774	8.61485	8.94649	9.44713	9.71009	9.43603	10.0258	9.776	10.1168	10.4785	10.5962	10.5122	10.4244	10.4095	10.4875	10.5704	10.5491	10.4378	10.8274	10.7156	10.8253	NM_005952 // ENST00000394485 // BC032338 // ENST00000290704 // ENST00000394490	MT1X	metallothionein 1X	4501
17041517	-0.100093	0.893814	0.439792	0.562275	-0.345998	0.0980057	0.193886	0.5159	-0.850813	2.61137e-05	-0.052852	0.942032	-0.298564	0.223052	0.499396	0.00569006	0.298288	0.224034	0.345721	0.281046		4.92626	5.06091	5.12855	4.86442	5.11733	5.24108	4.74525	4.21065	4.91478	4.61845	4.14627	4.45483	6.6556	6.74071	6.80161	6.44669	6.71804	6.69253	6.79443	6.66191	6.56884	6.42045	6.57498	6.72885
16843728	0.0812255	0.833863	0.00409737	0.994772	0.134173	0.274031	0.0570447	0.793449	-0.850759	1.2602e-08	-0.158482	0.396115	0.0190963	0.944124	0.711373	1.5718e-07	0.107357	0.542661	-0.00771961	0.992903		10.4244	10.4332	10.4593	10.4423	10.4047	10.4883	10.665	10.7897	10.7799	9.81277	9.66673	9.72207	10.5796	10.4858	10.604	10.7561	10.522	10.6853	10.6657	10.9227	10.819	10.5146	10.5361	10.5682	NM_021978 // ENST00000278742 // BC030532	ST14	suppression of tumorigenicity 14 (colon carcinoma)	6768
16653489	-0.154804	0.94188	-0.484498	0.776377	0.316724	0.624503	-0.0129706	0.993074	-0.850294	0.0677292	-0.0749493	0.972433	0.100207	0.937547	0.875552	0.0635139	-0.107594	0.939466	-0.324111	0.858353		8.9862	8.91915	8.79598	9.02908	9.00149	9.04763	9.02219	9.01932	9.03949	7.86665	7.98945	8.04588	9.47903	9.19506	9.24383	9.35228	9.21175	9.31832	9.4052	9.17766	9.2985	9.10805	9.05053	9.03302	NM_001135049 // NM_130469 // NM_001135047 // NM_001135048 // ENST00000413024 // ENST00000267569 // ENST00000435893 // ENST00000419727 // ENST00000437176 // BC051303	JDP2	Jun dimerization protein 2	122953
16793222	-0.158339	0.876574	0.0398698	0.978499	-0.093104	0.812761	0.105105	0.864284	-0.848656	0.00109806	0.159502	0.850766	-0.6346	0.0348112	0.373558	0.161294	0.369916	0.321145	-0.17158	0.866778		11.1627	11.2702	11.1693	11.25	11.2314	11.2451	11.3027	11.3981	11.2877	10.3468	10.0763	10.1628	11.5391	11.3942	11.3466	11.6561	11.3483	11.3317	11.5864	11.4437	11.4038	11.4834	11.4572	11.3518	NM_005628 // NM_001145145 // NM_001145144 // ENST00000306894 // ENST00000434726 // ENST00000412532 // U53347	SLC1A5	solute carrier family 1 (neutral amino acid transporter), member 5	6510
16656621	0.159272	0.929914	0.146617	0.938655	-0.0600144	0.934336	-0.0726692	0.946657	-0.847803	0.0368784	-0.321468	0.787777	0.178499	0.848637	0.704834	0.0929989	-0.0835459	0.947803	0.154968	0.937534		7.03131	6.81911	6.82801	6.80401	6.9885	6.87965	7.07751	7.05837	7.08884	8.15047	8.35739	8.32249	6.89584	6.96489	6.95546	6.8263	6.85366	7.08828	6.68755	7.04637	6.95768	7.00394	6.99775	6.97091	NR_027045 // ENST00000377320 // BC144613	C1orf200	chromosome 1 open reading frame 200	644997
17118830	-0.0100955	0.991386	-0.0515421	0.948705	0.0684315	0.785392	0.0269849	0.951815	-0.847015	1.13116e-05	-0.212554	0.551343	-0.198426	0.452672	0.436035	0.0090079	0.252573	0.289112	-0.0142843	0.991904		5.0568	5.46473	5.0636	5.26692	5.25224	4.94748	7.44078	7.34762	7.20139	6.0758	6.12494	5.85091	5.28653	4.98224	5.22221	4.87358	5.37674	5.23148	6.02563	5.74962	5.73192	5.93404	5.95063	5.89258	NM_017831 // ENST00000217740 // BC012021	RNF125	ring finger protein 125	54941
16692285	-0.0461598	0.961159	-0.142133	0.856155	0.676336	0.00296805	0.580363	0.0123335	-0.845982	8.92181e-05	-0.122262	0.854649	-0.269196	0.366101	0.454523	0.022071	0.72259	0.00157496	-0.222943	0.684358		9.32607	9.25183	9.1263	9.44441	9.41756	9.39055	9.3694	9.48469	9.40852	8.90086	8.73659	8.6489	9.93387	9.85159	9.88378	10.0515	9.843	9.90633	10.0446	9.94982	9.87762	9.82924	9.79373	9.76161	NM_013302 // ENST00000263026 // BC032665	EEF2K	eukaryotic elongation factor-2 kinase	29904
17023758	0.0880852	0.876702	0.0249592	0.974684	-0.662049	0.000115834	-0.725175	4.68936e-05	-0.845194	1.51628e-06	0.159315	0.629369	-1.00177	5.31922e-07	0.0027418	0.991298	0.542963	0.000971277	0.203245	0.530213		8.49622	8.39445	8.42628	8.51571	8.39726	8.43306	8.24725	8.27623	8.32961	9.07635	9.02695	9.08799	8.32733	8.4033	8.37124	8.34618	8.2872	8.32919	8.26452	8.4226	8.35567	8.33518	8.41624	8.35453
16838300	0.0411969	0.934692	0.0170585	0.978692	0.190295	0.140136	0.166157	0.293393	-0.844437	4.94578e-08	-0.468788	0.000798139	-0.166145	0.289216	0.209504	0.0592885	0.285415	0.0255747	-0.0710247	0.875078		8.49622	8.39445	8.42628	8.51571	8.39726	8.43306	8.24725	8.27623	8.32961	9.07635	9.02695	9.08799	8.32733	8.4033	8.37124	8.34618	8.2872	8.32919	8.26452	8.4226	8.35567	8.33518	8.41624	8.35453
16654621	-0.107468	0.974179	-1.27207	0.621607	0.352942	0.70186	-0.811657	0.411947	-0.843615	0.202962	-0.428248	0.834034	0.342635	0.802598	0.758002	0.274176	0.0296306	0.989488	0.0193237	0.997027		8.49622	8.39445	8.42628	8.51571	8.39726	8.43306	8.24725	8.27623	8.32961	9.07635	9.02695	9.08799	8.32733	8.4033	8.37124	8.34618	8.2872	8.32919	8.26452	8.4226	8.35567	8.33518	8.41624	8.35453
17119068	-0.0778308	0.915216	-0.0677638	0.929859	0.0275177	0.926525	0.0375847	0.933123	-0.843591	1.53579e-05	-0.192354	0.625299	-0.170101	0.557886	0.481137	0.00503107	0.11357	0.76388	-0.0840487	0.912704		7.1383	7.16448	7.14451	7.08486	7.07373	7.1433	6.99289	7.31856	7.33242	7.99843	8.08282	8.32255	7.04699	6.91337	6.76387	7.06599	6.94619	6.97661	6.84273	6.82972	6.93921	6.76994	6.80351	6.89184	NM_006137 // ENST00000312648 // AY935535	CD7	CD7 molecule	924
16651429	0.0193746	0.987642	-0.121341	0.887974	0.382791	0.132935	0.242076	0.498827	-0.842806	0.000243415	-0.155217	0.817341	-0.000600726	0.99918	0.686989	0.00197128	0.250668	0.493211	-0.132723	0.882979		9.16747	9.0741	9.19813	9.26746	9.16762	9.16564	9.68787	9.67161	9.77421	8.82008	8.55523	8.60053	9.46446	9.48023	9.50968	9.57702	9.40009	9.49777	9.6372	9.58058	9.53144	8.92977	8.82604	8.70461	NM_030767 // ENST00000307564 // ENST00000374088 // BC055285 // ENST00000394582 // ENST00000374075 // ENST00000223791 // ENST00000312033 // ENST00000320310 // ENST00000374079 // ENST00000394574 // ENST00000492875	AKNA	AT-hook transcription factor	80709
16931647	0.0379474	0.926552	0.0167094	0.974573	0.117046	0.31522	0.0958079	0.555378	-0.842724	6.07561e-09	-0.246545	0.05255	-0.0801019	0.640788	0.516078	5.17756e-06	0.181273	0.133985	-0.0158751	0.979496		8.1461	8.01854	8.14664	8.25292	8.183	8.13699	8.66667	8.64143	8.58875	8.03392	8.01784	7.99078	8.34118	8.47012	8.35281	8.31282	8.40145	8.29732	7.44069	7.71499	7.65906	7.28062	7.33698	7.25201	NM_032369 // NM_001040107 // ENST00000356742 // BC032672 // BC009731 // AY359054 // AK293543 // BC007277 // GU211002 // ENST00000242607 // ENST00000377649 // ENST00000439744	HVCN1	hydrogen voltage-gated channel 1	84329
16931276	0.17572	0.766158	-0.124584	0.850627	-0.37427	0.0530567	-0.674574	0.000723633	-0.842493	1.35868e-05	0.172852	0.676002	-0.444633	0.023431	0.570712	0.00102018	-0.128992	0.71261	-0.199355	0.653669		8.63091	8.72142	8.73996	8.96275	8.83657	8.76546	9.20117	9.32304	9.34399	10.3467	10.1586	10.2844	9.17764	8.98608	9.13818	9.08007	9.04349	9.12724	9.26646	9.25092	9.0242	9.22824	9.15494	9.10707	NM_080621 // ENST00000369886 // BC067362 // ENST00000450107 // ENST00000478694 // ENST00000498830	SAMD10	sterile alpha motif domain containing 10	140700
16814510	0.0607023	0.887574	0.210299	0.603902	-0.141137	0.260918	0.00845995	0.976802	-0.842342	2.21362e-08	-0.155687	0.430793	-0.212123	0.101266	0.474533	4.2208e-05	0.117095	0.504579	0.0461089	0.923721		6.07141	6.11753	5.90047	5.98695	5.93568	5.78352	6.2666	6.30772	6.08237	7.40289	7.32843	7.14464	6.31137	6.00897	6.05894	6.19897	5.98697	6.06752	6.03074	5.78703	5.82556	5.97184	5.7805	5.85075	NM_001145102 // NM_001145103 // NM_005902 // NM_001145104 // ENST00000327367 // ENST00000439724 // AK298139	SMAD3	SMAD family member 3	4088
16656381	0.177518	0.917392	0.049205	0.982813	0.208779	0.718332	0.0804664	0.94001	-0.841514	0.0326426	-0.303885	0.796634	0.311567	0.676151	0.849195	0.0331818	0.110765	0.924543	0.213553	0.90232		9.23172	9.15995	9.31188	9.34643	9.07676	9.36016	8.90977	8.75214	8.89089	10.4648	10.5709	10.8711	9.34362	9.7665	9.68853	9.48778	9.60391	9.70721	9.37369	9.55225	9.64864	8.79992	9.17291	8.96045	NM_016428 // NM_001135186 // ENST00000225941 // ENST00000419580 // AB037886	ABI3	ABI family, member 3	51225
16654593	-0.104911	0.964788	-0.325738	0.866492	-0.0241077	0.979995	-0.244935	0.825617	-0.841173	0.0876383	-0.496448	0.68321	-0.0843224	0.950185	0.260403	0.674825	-0.130369	0.927967	-0.190584	0.935915		8.38904	8.20203	8.59344	8.26158	8.43179	8.55626	6.83757	7.58557	7.58019	5.71658	6.03653	5.86389	8.02726	8.24173	8.13124	7.72747	8.04228	8.23	8.56828	8.82737	8.85386	8.12874	8.54179	8.5848
16859802	0.0321837	0.933334	0.0144608	0.975716	0.0128002	0.931828	-0.00492269	0.984139	-0.84103	1.39285e-09	-0.294474	0.00591662	-0.0461035	0.798439	0.500452	1.89996e-06	-0.000120593	0.999582	-0.0590243	0.858095		7.50328	7.49626	7.60134	7.48074	7.5931	7.57887	7.41301	7.58663	7.60028	8.50361	8.62459	8.62023	7.52538	7.69605	7.67527	7.70703	7.61833	7.68912	7.36693	7.41327	7.47433	7.49436	7.62942	7.29744	NM_022835 // ENST00000409794 // AK302476 // ENST00000458508 // ENST00000425673 // ENST00000409797 // ENST00000378550 // ENST00000451354 // ENST00000478523	PLEKHG2	pleckstrin homology domain containing, family G (with RhoGef domain) member 2	64857
16799277	0.268738	0.827546	-0.1658	0.899653	3.16706	6.54002e-09	2.73252	5.79163e-08	-0.840967	0.00877367	-1.47182	0.000402349	2.38499	2.9811e-07	1.75414	5.72488e-06	1.28324	0.000671857	0.501165	0.466459		9.48649	9.42424	9.32215	9.52345	9.4826	9.39077	9.82188	9.98378	9.83921	8.7779	9.01979	8.96831	9.78111	9.82068	9.8124	9.74841	9.80464	9.83688	10.0303	10.1349	10.0364	9.82323	9.78672	9.78347	NM_020945 // ENST00000325239 // ENST00000265453 // AK301736 // BC034937 // BC032420 // ENST00000426033 // ENST00000413659 // ENST00000312002 // ENST00000416831 // ENST00000454161 // AK127650 // AK024502 // ENST00000360890 // ENST00000374161 // AK093607 // ENST00000456127 // ENST00000465910 // ENST00000490507 // ENST00000497480 // AK310374	WDFY4	WDFY family member 4	57705
16865730	0.161753	0.642754	0.0109095	0.984773	-0.0181316	0.914024	-0.168976	0.187428	-0.840719	7.53006e-09	-0.464285	0.000180121	0.00152012	0.99622	0.377954	0.000226914	0.0622274	0.771384	0.0818791	0.801102		8.21677	8.41653	8.34846	8.28119	8.22128	8.39791	7.54602	7.5549	7.63474	7.3452	7.43117	7.3169	8.27758	8.3691	8.20354	8.31024	8.24882	8.35521	8.33463	8.36063	8.18496	8.33719	8.33387	8.31345	NM_152682 // ENST00000326397 // BC017472 // BC107432 // BC067752 // AK293274 // ENST00000510702 // ENST00000514322 // ENST00000327570 // ENST00000512740 // ENST00000510968 // ENST00000506467	RWDD4 // RWDD4A	RWD domain containing 4 // RWD domain containing 4A	201965
16664156	0.00375512	0.993618	0.0429795	0.907403	0.0984104	0.377374	0.137635	0.275549	-0.840628	2.63617e-09	-0.0449494	0.887669	0.126896	0.326201	0.922574	6.64344e-10	-0.102841	0.488305	-0.0743552	0.808816		11.3119	11.3769	11.2335	11.3442	11.3979	11.2114	10.614	10.6803	10.6084	11.5089	11.4984	11.5283	10.8857	10.8586	10.8917	10.8901	10.8632	10.8177	11.147	10.9658	10.9708	11.313	11.2989	11.2106
17121894	0.073715	0.836052	-0.0192725	0.967731	0.00113584	0.995215	-0.0918516	0.563188	-0.839929	4.35073e-09	-0.367123	0.00166491	-0.076084	0.652146	0.396722	8.61305e-05	0.0240616	0.92955	-0.0531582	0.890234		9.13512	9.08062	9.13931	9.22	8.969	9.09287	9.18736	9.14254	9.15359	8.13024	7.97994	8.05082	8.98248	9.10818	9.18364	8.80962	8.95059	9.10077	9.0724	9.14157	9.1386	9.02648	8.99773	8.86246	NM_032756 // ENST00000334815 // BC007293	HPDL	4-hydroxyphenylpyruvate dioxygenase-like	84842
16656569	-0.104235	0.944277	-0.0290206	0.987515	-0.138886	0.772125	-0.0636707	0.941516	-0.839846	0.00841512	-0.0501713	0.973305	0.0183152	0.985641	0.80799	0.0119342	-0.268776	0.673783	-0.111575	0.943186		6.71784	6.92093	6.92394	6.90647	7.19382	7.28651	5.39095	5.97793	5.68347	8.60292	9.39451	9.28052	6.69122	7.25334	6.89998	6.59329	7.05348	6.7947	7.55052	8.56078	8.05622	9.59965	10.1744	9.92261	NM_006529 // NM_001042543 // ENST00000274093 // ENST00000340217 // BC036086	GLRA3	glycine receptor, alpha 3	8001
16654523	-0.538441	0.580821	-0.413391	0.661343	-0.109722	0.76511	0.0153275	0.983045	-0.839767	0.000911822	-0.376362	0.422882	-0.00839392	0.99254	0.455011	0.0698316	-0.118957	0.850204	-0.0176285	0.993333		12.0181	11.8865	12.0119	12.0614	11.9685	11.9558	11.9824	11.9747	11.8673	11.1517	11.1423	11.2008	11.963	11.969	11.9811	12.0028	11.8667	11.9667	11.8773	11.8682	11.9153	11.5905	11.5689	11.5568	NM_001143995 // NM_004811 // ENST00000263845 // ENST00000395074 // BC007490 // ENST00000412226	LPXN	leupaxin	9404
17122122	-0.152975	0.738357	-0.159717	0.737618	-0.393606	0.0100252	-0.400348	0.0106459	-0.839585	8.22331e-07	-0.10128	0.801571	-0.266923	0.117226	0.471382	0.00074193	0.00793431	0.986466	0.134617	0.737861		9.85996	9.72085	9.50704	9.77529	9.57001	9.5057	9.31209	9.32357	9.26347	10.7651	10.7739	10.5658	10.4913	10.5719	10.4387	10.0443	10.4254	10.3541	9.9931	9.97022	9.87232	10.5412	10.5569	10.5418
16897797	-0.00670624	0.989687	-0.107573	0.75415	-0.0710459	0.581094	-0.171913	0.172675	-0.838933	7.11286e-09	-0.106033	0.633816	-0.0170476	0.947848	0.715852	6.93842e-08	-0.0983566	0.562849	-0.0443583	0.919565		10.328	10.3628	10.216	10.2769	10.2845	10.2055	9.80042	9.75813	9.75179	9.25803	9.28359	9.27875	10.3541	10.5157	10.4378	10.1404	10.4649	10.3981	10.2174	10.3569	10.3483	10.2439	10.3837	10.3388	NM_018082 // NM_001160708 // ENST00000228347 // BC046238	POLR3B	polymerase (RNA) III (DNA directed) polypeptide B	55703
16917173	0.0813801	0.897937	-0.0941852	0.872313	-0.103104	0.616394	-0.278669	0.152725	-0.838551	3.19383e-06	-0.296654	0.204341	-0.0211515	0.960172	0.520745	0.000777865	0.116032	0.706467	0.197984	0.579329		7.05742	7.10816	7.0789	7.24287	7.09027	7.05994	7.46361	7.75434	7.57411	9.38107	9.34294	9.12222	7.64173	7.98887	7.84761	7.22324	7.69896	7.62634	7.27695	7.27903	7.08961	7.77949	8.05609	7.89582
16656383	0.29574	0.791578	-0.198633	0.8711	0.508681	0.164374	0.0143073	0.987531	-0.838024	0.00642849	-0.121573	0.920367	0.0407342	0.963345	0.757185	0.014385	0.376376	0.454597	-0.0915702	0.951721		9.4398	9.45605	9.42149	9.54011	9.48564	9.46896	9.59577	9.80022	9.74734	10.5755	10.7734	10.6467	9.51069	9.56851	9.5689	9.37502	9.57477	9.57869	9.68011	9.74324	9.64791	9.97524	10.0164	10.0551	NM_015137 // ENST00000254624 // BC152442 // ENST00000334503 // ENST00000377917 // ENST00000519656 // ENST00000519920 // ENST00000523074 // ENST00000521940	EFR3A	EFR3 homolog A (S. cerevisiae)	23167
16777832	0.26446	0.629931	-0.00873626	0.99318	0.446868	0.00781228	0.173673	0.462658	-0.837394	2.8367e-06	0.25615	0.31318	0.0128705	0.976829	1.10641	7.26955e-08	0.344639	0.0502586	-0.0893587	0.884506		7.8669	8.24215	8.09904	7.92029	8.08444	8.13427	7.75596	7.83961	7.78093	6.53188	6.65689	6.33608	9.83111	10.2306	10.0583	10.0445	10.2441	9.92029	9.03597	9.50372	9.33387	8.21162	8.58819	8.41458	NM_203365 // NM_213589 // ENST00000308091 // ENST00000319170 // AB053311 // AY523977 // AY523978 // AY494951 // ENST00000453034 // ENST00000374488 // ENST00000374493 // ENST00000374489 // ENST00000432342 // ENST00000439222 // ENST00000413201 // ENST00000423104 // ENST00000418114 // ENST00000419464 // ENST00000355146 // ENST00000428637 // ENST00000420371 // ENST00000465669 // ENST00000457812	RAPH1	Ras association (RalGDS/AF-6) and pleckstrin homology domains 1	65059
16656659	0.0358378	0.982848	-0.104392	0.941769	-0.140355	0.755293	-0.280585	0.608574	-0.837178	0.00568767	0.0816891	0.948692	-0.0502808	0.952256	0.868586	0.00464218	-0.324601	0.543738	-0.234527	0.834317		8.70741	8.84231	8.55131	8.72938	8.70018	8.91096	8.04125	8.23592	8.30061	9.60978	9.78784	9.69817	9.14213	8.94654	9.00574	9.00218	8.90786	8.93453	9.21264	8.85467	8.78677	9.42057	9.28876	9.18969	NM_016496 // NM_001005415 // NM_001005416 // ENST00000393944 // ENST00000381035 // ENST00000215555 // ENST00000429675 // BC032624	MARCH2	membrane-associated ring finger (C3HC4) 2	51257
16955291	-0.0457753	0.912566	-0.0512315	0.896509	-0.104711	0.392979	-0.110167	0.486577	-0.837019	9.80069e-09	-0.322294	0.00877133	0.115882	0.451293	0.630608	5.09817e-07	-0.06074	0.784034	0.159853	0.409909		6.90112	7.12996	7.24073	7.41036	7.28888	6.98633	7.54519	7.86564	7.84334	9.66542	9.59797	9.62392	7.97518	7.57432	7.73291	7.84846	7.72915	7.65062	8.13581	7.99955	7.87604	8.974	8.79207	8.53013	NM_152288 // ENST00000318663 // BC015555 // ENST00000420438	ORAI3	ORAI calcium release-activated calcium modulator 3	93129
17021628	0.0896817	0.885267	0.0261791	0.975135	-0.140629	0.473303	-0.204132	0.369703	-0.835324	3.88265e-06	-0.296985	0.211548	0.192247	0.407875	0.730586	2.26325e-05	-0.0998872	0.76597	0.232989	0.467879		7.1789	7.19378	7.35077	7.62763	7.20708	7.05285	9.17618	9.10129	8.91703	7.77186	7.75348	7.59186	9.07929	9.04888	8.95019	8.85043	8.83953	8.78186	9.34383	9.13689	9.17638	9.1284	8.90573	8.7642	NM_006892 // NM_175848 // NM_175850 // NM_175849 // ENST00000328111 // ENST00000353855 // ENST00000201963 // ENST00000348286 // AF331857 // ENST00000344505 // ENST00000443239 // ENST00000456297 // ENST00000375623	DNMT3B	DNA (cytosine-5-)-methyltransferase 3 beta	1789
16745380	0.169466	0.775841	0.19092	0.751723	-0.0463475	0.864986	-0.0248937	0.956369	-0.835097	1.40782e-05	-0.358502	0.149859	-0.413289	0.0364269	0.0633051	0.776822	0.603346	0.00168245	0.236404	0.539361		13.0718	13.153	13.0874	13.1354	13.1285	13.1309	13.2509	13.3321	13.2253	12.5492	12.5173	12.554	13.2413	13.2066	13.1378	13.2841	13.1823	13.1471	13.2388	13.2065	13.2379	13.1732	13.1007	13.0974	NM_003486 // ENST00000261622 // AF104032	SLC7A5	solute carrier family 7 (cationic amino acid transporter, y+ system), member 5	8140
17118730	-0.146653	0.820366	0.124018	0.855616	-0.162262	0.468785	0.108408	0.762467	-0.834748	2.04898e-05	-0.0760667	0.907744	0.0535328	0.90166	0.812215	3.16569e-05	-0.218742	0.425652	-0.00294672	0.997824		10.8654	10.8751	10.8701	10.8809	10.8633	10.8292	10.8771	10.9198	10.8625	11.2605	11.3359	11.3557	10.7173	10.5425	10.5188	10.4486	10.5117	10.5364	10.6048	10.5136	10.4644	10.5366	10.4525	10.5216	NM_015323 // ENST00000369278 // BC036379 // ENST00000461673	KIAA0776	KIAA0776	23376
16782098	0.0924831	0.95941	-0.0325247	0.987963	1.82972	6.72268e-05	1.70471	0.000172238	-0.834016	0.0236882	0.082939	0.96005	-0.621861	0.221105	0.295094	0.50023	0.472881	0.425689	-1.9787	9.58589e-05		8.15002	7.77861	7.8749	8.65226	7.94932	7.98279	8.26728	8.48206	8.47511	6.13512	6.18528	6.13875	7.44306	7.28281	7.3714	6.96171	7.11483	7.08245	6.86778	7.31603	7.21013	6.35681	6.76537	6.80925
16721535	0.123664	0.876002	-0.20794	0.774521	-0.0861702	0.770197	-0.417774	0.0908652	-0.833783	9.99025e-05	0.0334124	0.970897	-1.4344	3.71871e-07	-0.567206	0.00449538	0.992925	4.72628e-05	-0.355306	0.336195		11.4804	11.3639	11.4341	11.5236	11.4271	11.549	11.8652	11.8163	11.8706	11.2356	11.0895	10.8957	11.7481	11.5044	11.6102	11.6203	11.6019	11.602	11.7143	11.697	11.7558	12.0496	12.2159	12.1954	NM_020228 // NM_199437 // NM_199438 // NM_199439 // ENST00000360871 // ENST00000358825 // ENST00000423662 // ENST00000304538 // BC112934 // ENST00000450225	PRDM10	PR domain containing 10	56980
16790223	0.082638	0.940511	-0.0692363	0.953301	0.0621281	0.875732	-0.0897462	0.880717	-0.832406	0.000780937	-0.185305	0.794306	-0.914198	0.00102875	-0.267097	0.314418	0.367799	0.285657	-0.608527	0.0913848		7.71153	7.57029	7.68297	8.01403	7.9004	7.68274	7.73532	7.92195	7.90299	8.10298	8.07626	7.91655	7.12333	7.01856	7.00565	6.87892	6.82794	6.76785	6.82786	6.48087	6.31005	6.592	6.1909	6.3932	NM_001039654 // ENST00000506609 // BC053858 // ENST00000447310 // ENST00000376230 // ENST00000325134 // ENST00000344222 // ENST00000457177	ZNF550	zinc finger protein 550	162972
16666055	0.213238	0.884368	-0.054999	0.978855	1.0193	0.0117883	0.751058	0.0906049	-0.832058	0.0178394	0.211054	0.860677	0.489635	0.353465	1.53275	8.68577e-05	0.731177	0.0987103	0.201517	0.894751		8.03523	7.88877	7.90073	8.191	8.2035	8.07652	6.13332	6.1481	5.93728	6.36792	6.56687	6.20015	7.92311	7.44387	7.64649	7.66192	7.40619	7.32063	8.06835	7.6113	7.38726	8.40948	8.42579	8.34218	NM_016083 // NM_001160226 // NM_001160258 // NM_001160259 // NM_001160260 // NM_033181 // ENST00000369501 // ENST00000369499 // ENST00000428600 // ENST00000468898 // X54937	CNR1	cannabinoid receptor 1 (brain)	1268
17043355	-0.031911	0.932729	-0.0110743	0.980924	-0.0799201	0.461215	-0.0590834	0.725804	-0.831828	1.37476e-09	-0.13527	0.375245	-0.0109263	0.963755	0.685632	2.07833e-08	0.0233203	0.924416	0.092314	0.692078		9.03152	8.9898	8.97035	9.06623	9.04416	8.96405	8.79074	8.69916	8.71488	9.77058	9.80995	9.55696	8.82914	8.81168	8.84123	8.79426	8.69902	8.63939	8.86615	8.77201	8.71364	8.90588	8.78776	8.71748	NM_016824 // NM_001121 // NM_019903 // ENST00000277900 // ENST00000356080 // ENST00000360162 // BC062559 // ENST00000497125 // ENST00000468251 // ENST00000487085 // ENST00000495661 // ENST00000496517 // ENST00000475954 // ENST00000473669 // ENST00000468345 // ENST00000480344 // ENST00000484622 // ENST00000459738 // ENST00000486014 // ENST00000488837 // ENST00000472568 // ENST00000488799 // ENST00…	ADD3	adducin 3 (gamma)	120
16654545	-0.0505304	0.956137	0.00672565	0.995599	-0.161834	0.52595	-0.104578	0.806384	-0.831089	7.92589e-05	-0.177405	0.728965	0.0327512	0.950465	0.686435	0.000655901	-0.0786679	0.875952	0.115917	0.885598		9.88979	9.728	9.50225	9.93136	9.6999	9.69983	9.90714	9.69858	9.6376	7.83583	7.6797	7.69474	9.81867	9.46349	9.46229	9.75448	9.45973	9.55213	9.85455	9.48557	9.42076	9.58746	9.16074	9.12559	NM_001098814 // ENST00000399609 // AL832361 // ENST00000330063	SRL	sarcalumenin	6345
16669245	0.215664	0.803219	-0.413524	0.656149	0.129692	0.705755	-0.499497	0.0929303	-0.830651	0.000696255	-0.455451	0.234245	-0.0193622	0.978415	0.355838	0.151732	0.212905	0.640183	0.063851	0.958076		10.3985	10.4545	10.39	10.4993	10.4817	10.4709	10.2546	10.2425	10.2534	10.1213	9.90671	9.89999	10.7329	10.8968	10.8392	10.7972	10.8576	10.9065	11.2073	11.0065	10.9142	11.0729	11.0441	10.9255	NM_001127217 // NM_005905 // ENST00000379826 // ENST00000399275 // ENST00000350148 // BC104760 // ENST00000483941	SMAD9	SMAD family member 9	4093
17122116	-0.0653219	0.909135	-0.125393	0.796966	-0.28269	0.0667962	-0.342762	0.0307519	-0.830356	8.7206e-07	-0.0972747	0.81252	-0.151282	0.482952	0.581799	7.68899e-05	0.0399084	0.917313	0.171317	0.599527		9.89765	9.79006	9.64537	9.70669	9.62838	9.4719	9.33195	9.29662	9.24468	10.5384	10.5998	10.3872	10.3494	10.4898	10.3201	10.0884	10.4163	10.2375	9.94118	9.92271	9.83742	10.4511	10.3653	10.4382
17122118	-0.0653219	0.909135	-0.125393	0.796966	-0.28269	0.0667962	-0.342762	0.0307519	-0.830356	8.7206e-07	-0.0972747	0.81252	-0.151282	0.482952	0.581799	7.68899e-05	0.0399084	0.917313	0.171317	0.599527		7.94939	7.87636	7.86263	7.94988	7.88378	7.82668	7.49573	7.72911	7.7088	8.75865	8.78499	8.6487	8.05655	7.9574	8.00508	8.0176	8.09827	8.00257	8.18024	8.22937	7.91911	8.26503	8.33703	8.25481
16937152	-0.0512031	0.966682	-0.368694	0.681298	-0.261518	0.403582	-0.579009	0.0524246	-0.829202	0.00101402	-0.507599	0.178385	0.151989	0.761062	0.473592	0.0577367	-0.613928	0.0343734	-0.200421	0.819141		8.52071	8.58205	8.54666	8.71678	8.56733	8.55115	8.45561	8.63654	8.55094	8.41949	8.45177	8.34477	7.50775	7.49019	7.48429	7.394	7.25159	7.50705	8.48817	8.29036	8.28263	8.53521	8.34179	8.30455	NM_001130987 // NM_001130978 // NM_001130979 // NM_001130981 // NM_001130983 // NM_001130982 // NM_001130977 // NM_001130980 // NM_001130455 // NM_001130985 // NM_001130984 // NM_003494 // NM_001130986 // NM_001130976 // ENST00000394120 // ENST00000413539 // ENST00000429174 // ENST00000258104 // EU515161 // ENST00000435743 // ENST00000479049 // ENST00000475076 // ENST00000493767 // ENST0000047287…	DYSF	dysferlin, limb girdle muscular dystrophy 2B (autosomal recessive)	8291
17126256	0.0904159	0.877442	0.031395	0.966533	-0.126371	0.509392	-0.185392	0.412232	-0.828641	2.84708e-06	-0.233108	0.385928	-0.105005	0.708731	0.490528	0.00112604	0.0839798	0.809251	0.105346	0.84934		6.01009	6.28521	6.31602	6.3349	6.14759	6.15582	6.41577	6.53541	6.59063	7.74009	7.77424	8.11267	6.40959	6.47445	6.55609	6.5539	6.42514	6.50654	6.36145	6.34671	6.44648	6.63094	6.43323	6.41829
16878081	0.204173	0.676008	0.0165636	0.983648	0.226767	0.162789	0.0391577	0.912396	-0.828223	1.31174e-06	-0.440613	0.0118023	-0.703496	3.56399e-05	-0.315886	0.0215799	0.761626	1.41436e-05	-0.168637	0.629834		9.24133	9.0665	9.16382	9.36785	9.27663	9.25449	9.47028	9.35176	9.4422	8.47818	8.09202	8.20025	9.3034	9.39576	9.34213	9.51471	9.28873	9.27775	9.34335	9.40173	9.36389	9.0241	9.04351	9.04979	NM_003223 // ENST00000204517 // S73885 // ENST00000396765	TFAP4	transcription factor AP-4 (activating enhancer binding protein 4)	7023
17122216	0.180832	0.833404	0.023366	0.985702	0.358489	0.175786	0.201023	0.620042	-0.828025	0.000385558	-0.0539223	0.955863	0.206153	0.599866	0.980256	7.04907e-05	0.62658	0.0149817	0.474244	0.200307		6.69677	7.1276	6.68591	6.97606	7.04909	6.94163	6.29356	6.5011	6.26476	8.43868	8.23678	8.40944	6.38747	6.67795	6.8865	6.44001	6.76194	6.62154	6.66461	6.77337	6.61367	6.99117	7.39735	7.53304
16923491	0.00719447	0.991676	0.00991904	0.989125	0.0800856	0.652547	0.0828102	0.749424	-0.827726	4.33795e-07	-0.161075	0.55125	-0.053244	0.854054	0.613407	2.18091e-05	0.0455557	0.894218	-0.0877738	0.858335		3.34642	3.1482	3.17259	3.6785	2.9422	3.32155	3.05493	3.12081	3.10992	3.45647	3.1441	2.97794	4.53835	4.70927	4.58257	3.79829	4.61891	4.22029	5.90982	6.10125	5.67078	5.58868	6.02217	5.75447
16803114	0.101359	0.761356	0.0666533	0.858056	0.161257	0.151569	0.126551	0.385355	-0.827588	9.23325e-09	-0.359653	0.00277225	-0.0902763	0.587134	0.377658	0.000224282	0.013561	0.964502	-0.237972	0.0966381		8.07558	8.19949	8.20917	8.22613	8.28331	8.31354	8.04339	8.18516	8.10024	6.82309	7.11845	6.84778	8.16188	8.39798	8.5158	8.28206	8.42274	8.44903	8.67028	8.94672	8.59018	8.33805	8.33199	8.2597	NM_021911 // NM_000813 // ENST00000274547 // ENST00000393959 // ENST00000353437 // BC099705 // ENST00000520240 // ENST00000522758 // ENST00000523730	GABRB2	gamma-aminobutyric acid (GABA) A receptor, beta 2	2561
16817254	0.0401909	0.961159	0.00876143	0.993859	0.539741	0.00613206	0.508311	0.0117631	-0.827404	2.30872e-05	0.0340586	0.96423	-0.164338	0.583516	0.697124	0.000178945	0.395511	0.0564761	-0.308568	0.340904		9.57574	9.56583	9.59508	9.66551	9.67486	9.70413	9.67303	9.61695	9.68509	10.4283	10.2567	10.249	9.65399	9.60464	9.62251	9.53897	9.54192	9.62408	9.35775	9.43302	9.39429	9.45411	9.59405	9.55286	NM_173474 // ENST00000287706 // BC017336	NTAN1	N-terminal asparagine amidase	123803
16764732	0.029756	0.982497	-0.108585	0.92043	1.58162	2.56545e-06	1.44328	9.05778e-06	-0.827296	0.00109886	-0.135336	0.876291	0.711749	0.0127407	1.40371	3.3038e-06	0.197391	0.697761	-0.672481	0.058554		11.2046	11.1703	11.253	11.2964	11.1974	11.2386	11.4865	11.4663	11.5199	10.4315	10.3927	10.5895	11.3026	11.39	11.3914	11.3721	11.3796	11.5088	10.8772	11.1289	11.0795	10.0622	9.88079	9.87849	NM_002831 // NM_080548 // NM_080549 // ENST00000318974 // ENST00000399448 // ENST00000456013 // AK298470 // ENST00000447931 // ENST00000416215	PTPN6	protein tyrosine phosphatase, non-receptor type 6	5777
16720760	0.214344	0.768045	0.0766418	0.934976	-0.437072	0.066291	-0.574774	0.0172443	-0.827232	0.000168706	-0.511392	0.0719145	-0.44264	0.0812197	-0.1268	0.617404	0.162697	0.701025	0.157129	0.836607		11.2151	11.195	11.3399	11.2179	11.1871	11.171	11.2468	11.015	11.2117	10.3148	10.0874	10.1485	11.0829	11.1946	11.2072	11.1126	11.1926	11.2151	11.079	11.1187	11.1613	11.0309	11.0002	11.0668	NM_032194 // ENST00000441448 // AK292165 // ENST00000368864 // ENST00000425871 // ENST00000454951	RPF2	ribosome production factor 2 homolog (S. cerevisiae)	84154
16704294	-0.0804856	0.915483	0.280334	0.668867	-0.131231	0.583573	0.229589	0.397696	-0.825776	3.06815e-05	-0.253343	0.466381	-0.18067	0.544654	0.391763	0.026491	0.137803	0.705568	0.0883636	0.911467		10.1348	10.1734	10.2732	10.2874	10.1428	10.2328	10.1524	10.0276	10.2118	11.0021	10.9417	11.0367	10.2552	10.3715	10.3304	10.3031	10.2439	10.3376	10.0621	10.2493	10.166	10.0101	10.1457	10.0064	NM_177401 // ENST00000300952 // ENST00000395622 // BC094778	MIDN	midnolin	90007
16656403	-0.272329	0.88781	-0.357913	0.843798	0.470347	0.428861	0.384763	0.660181	-0.825195	0.0756675	-0.825629	0.294826	0.22295	0.829384	0.222516	0.710341	0.415753	0.64033	0.168356	0.940788		10.0476	10.0954	10.0477	10.046	10.0827	10.1016	9.9976	10.0996	10.002	9.39744	9.44572	9.55477	10.084	10.2286	10.1006	10.169	10.2361	10.1781	10.1717	10.1764	10.2	10.1988	10.3142	10.2349	NM_006389 // NM_001130991 // ENST00000353883 // ENST00000404233 // U65785	HYOU1	hypoxia up-regulated 1	10525
17098949	0.138032	0.797016	0.000140745	0.999754	0.0498975	0.82887	-0.0879938	0.780376	-0.824691	3.58082e-06	-0.275066	0.259191	-0.293935	0.117033	0.255689	0.0909347	0.472955	0.00513946	0.129123	0.796191		5.63036	6.14682	5.88472	5.60555	5.91465	5.66925	7.20581	7.43476	7.4131	6.18501	6.064	6.05972	6.23854	6.10515	6.18067	6.00947	5.92279	5.999	5.751	5.76306	5.7277	5.70486	5.896	5.60558	NM_001040058 // NM_000582 // NM_001040060 // ENST00000237623 // ENST00000395080 // ENST00000360804 // AK295491 // ENST00000359072 // ENST00000509659 // ENST00000509334 // ENST00000513981 // ENST00000504310 // ENST00000508002 // ENST00000505146	SPP1	secreted phosphoprotein 1	6696
16651873	-0.244825	0.876002	-0.258165	0.867522	0.261149	0.634081	0.247809	0.761654	-0.824433	0.0340086	-0.0100812	0.997175	-0.360762	0.602422	0.45359	0.290561	0.229563	0.804996	-0.392348	0.738832		10.1524	9.97901	10.1643	10.1417	10.1444	10.0952	8.86	9.05016	9.07577	9.50891	9.6062	9.47703	10.1246	9.91187	10.0225	9.93919	10.0544	10.0071	10.1907	10.1568	10.0345	10.0379	9.85258	9.96949	NM_005759 // BC001439 // BT009920 // AF260261 // AK302853 // AK299824 // U23435 // U31089 // AK299672 // AK299092 // AK299688 // AK297537 // AK316343 // AK294429 // AK299750 // AK299679 // AK316000 // ENST00000441061 // ENST00000295851 // ENST00000261016 // ENST00000261018 // ENST00000430574 // ENST00000416001 // ENST00000451591 // ENST00000416396 // ENST00000376135 // ENST00000411547 // ENST0000…	ABI2	abl-interactor 2	10152
16720044	-0.0207688	0.971089	0.130375	0.746457	0.147815	0.282045	0.298959	0.0239058	-0.823851	9.28333e-08	-0.0691574	0.854351	-0.571483	3.72889e-05	0.183211	0.112945	0.909889	8.11564e-08	0.190591	0.380732		9.57284	9.35819	9.54767	9.74442	9.42989	9.56811	7.71575	7.71944	7.69118	8.17373	8.21018	8.17893	9.04331	8.53002	8.82252	8.89944	8.63429	8.56185	9.13139	8.97234	8.8148	9.13664	8.93346	8.97795	NM_003711 // NM_176895 // ENST00000307259 // ENST00000264775 // BC039847 // ENST00000396876 // ENST00000509667 // ENST00000515132 // ENST00000520263 // ENST00000502907	PPAP2A	phosphatidic acid phosphatase type 2A	8611
17108500	0.0333184	0.936387	-0.0337238	0.936129	0.133149	0.231185	0.0661066	0.719994	-0.823794	5.93507e-09	-0.180343	0.21679	-0.0333856	0.879803	0.610065	4.03468e-07	0.055035	0.798545	-0.111499	0.638325		3.02078	2.93117	3.25131	3.04201	3.20514	3.14192	3.18101	2.83686	2.76103	4.85032	5.23803	4.99017	3.13152	3.12292	3.0353	3.10587	2.93652	2.78802	3.07955	3.53888	3.15018	2.87286	3.07479	3.45926
16858122	0.0558554	0.873896	-0.00968456	0.984761	0.230783	0.0156351	0.165243	0.12236	-0.822373	1.62201e-09	-0.125902	0.433061	0.137917	0.229854	0.834388	1.23852e-09	-0.012152	0.963604	-0.105018	0.617912		10.0446	10.0392	10.0267	10.0813	10.0407	10.0141	10.1475	10.1063	10.0727	9.35386	9.08143	9.22254	10.0569	10.0406	9.91144	10.0154	9.96061	10.006	10.1326	10.1703	10.0413	10.1114	10.0273	10.1258	NM_004181 // ENST00000284440 // BC000332 // BC006305 // BC005117 // AK054579 // ENST00000381762 // ENST00000512419 // ENST00000505232 // ENST00000503431 // AB209038 // ENST00000514924 // ENST00000381760 // ENST00000472501 // ENST00000514764 // ENST00000510566 // ENST00000504818 // CR614782 // ENST00000512788 // ENST00000508768	UCHL1	ubiquitin carboxyl-terminal esterase L1 (ubiquitin thiolesterase)	7345
16830782	0.00766143	0.993242	-0.116019	0.855476	-0.126735	0.553531	-0.250416	0.269199	-0.821889	9.85011e-06	-0.365137	0.113547	-0.360101	0.062742	0.0966517	0.624319	0.214772	0.383286	-0.0185935	0.987246		10.2981	10.2219	10.3056	10.3778	10.2467	10.2484	10.5178	10.3972	10.5719	9.74616	9.69676	9.70142	10.1665	10.1334	10.1537	10.2521	10.1606	10.1607	10.1102	10.1777	10.1403	9.4227	9.47616	9.39663	NM_024652 // ENST00000388948 // ENST00000284395 // BC171802	LRRK1	leucine-rich repeat kinase 1	79705
16656641	-0.00617425	0.996035	-0.0449065	0.973126	0.216746	0.498261	0.178014	0.714969	-0.821125	0.00102061	-0.203729	0.763847	0.0157131	0.983584	0.633109	0.0097533	0.152052	0.786759	-0.048981	0.972834		9.40045	9.29169	9.36923	9.43651	9.32543	9.36298	9.14456	9.17113	9.23733	9.98344	9.93347	10.0175	9.20258	9.33035	9.29142	9.24769	9.18915	9.23291	9.14935	9.30685	9.25462	9.23783	9.31963	9.25624
16924979	0.0607239	0.866519	0.0305291	0.94005	0.0545801	0.658033	0.0243853	0.913958	-0.820933	2.91332e-09	-0.168573	0.227131	0.0843935	0.573824	0.736754	1.34184e-08	-0.0279615	0.908953	0.00185192	0.997809		10.1591	9.86005	9.88484	10.2873	9.95301	10.0441	9.32853	9.33784	9.40868	8.82516	8.51451	8.48307	9.35068	9.29237	9.39095	9.4376	9.40155	9.3689	9.06701	9.38974	9.28879	7.5708	7.57766	7.38992	NM_000246 // ENST00000324288 // AF410154 // ENST00000381835 // ENST00000388910	CIITA	class II, major histocompatibility complex, transactivator	4261
16766701	0.0493245	0.940722	-0.0256373	0.974573	0.245141	0.150266	0.170179	0.463888	-0.820246	2.91704e-06	-0.155244	0.65296	0.0226597	0.955092	0.687661	2.8731e-05	0.157013	0.53475	-0.0654687	0.922874		7.24914	7.11708	7.0366	7.69808	7.263	7.43604	7.74842	7.77862	8.09764	9.60504	9.03259	9.08304	7.14705	7.19882	7.44376	7.16602	7.03751	7.23033	7.11801	7.33991	7.26621	7.26719	7.41349	7.26724	NM_001098202 // NM_006497 // ENST00000322941 // ENST00000416386 // ENST00000399849 // DQ187313	HIC1	hypermethylated in cancer 1	3090
16829570	0.10584	0.85382	-0.143454	0.786459	0.735573	4.05872e-05	0.486279	0.00360319	-0.82023	2.55883e-06	0.161776	0.626097	-0.579485	0.000528464	0.402522	0.00529881	1.93878	4.20884e-11	0.62372	0.000897257		8.83283	8.71192	8.80464	8.85967	8.74155	8.84956	8.85664	8.8342	8.81143	7.96138	7.75294	7.71284	8.90727	9.09762	9.09103	8.94273	8.98559	9.17318	9.10713	9.17796	9.17485	8.60718	8.61293	8.58753	NM_016828 // NM_016819 // NM_016829 // NM_002542 // NM_016820 // NM_016821 // NM_016826 // NM_016827 // ENST00000339511 // ENST00000302008 // ENST00000344629 // ENST00000449570 // ENST00000302003 // ENST00000302036 // ENST00000349503 // ENST00000359753 // ENST00000383826 // ENST00000429146 // AK289858 // ENST00000457221 // ENST00000339542 // ENST00000425665 // ENST00000436092 // ENST00000432857 /…	OGG1	8-oxoguanine DNA glycosylase	4968
16958403	0.258376	0.5747	0.0473808	0.927806	0.296183	0.0267317	0.0851884	0.714386	-0.819197	1.77513e-07	0.161269	0.498088	0.522882	0.000174908	1.50335	3.00589e-11	0.0832254	0.742039	0.309924	0.0678574		8.44159	8.32085	7.96663	8.27341	8.35762	8.25023	8.89542	8.86941	8.84153	9.47461	9.66681	9.71251	8.86924	8.69204	8.7951	8.84528	8.67752	8.70927	8.7745	8.84782	8.73064	8.39721	8.17392	8.19474	NM_032932 // ENST00000394744 // ENST00000325874 // AY169244 // ENST00000394742	RAB11FIP4	RAB11 family interacting protein 4 (class II)	84440
16777812	0.0278582	0.974961	-0.182532	0.763327	-0.322343	0.0986873	-0.532733	0.00628126	-0.81895	1.82982e-05	0.173489	0.671743	0.28556	0.206126	1.278	5.76489e-08	-0.491275	0.0106382	0.116628	0.858268		7.27978	7.3385	7.45679	7.33526	7.58493	7.47913	7.02388	7.28919	7.29468	8.27006	8.26739	8.37205	7.23291	7.31692	7.2925	7.10092	7.27452	7.2933	7.50846	7.58538	7.50557	7.76293	7.74698	7.7136	NM_018328 // ENST00000407073 // ENST00000375752 // EF542797 // ENST00000453884 // ENST00000449898 // ENST00000496893 // ENST00000478804 // ENST00000488372 // ENST00000496158 // ENST00000478190	MBD5	methyl-CpG binding domain protein 5	55777
16911668	-0.0824632	0.954529	0.0555813	0.972722	-0.0544859	0.917044	0.0835586	0.914167	-0.818774	0.00594732	-0.706529	0.0946282	-0.124769	0.856268	-0.0125243	0.979794	0.516002	0.199659	0.445719	0.502755		5.42474	5.5132	5.46156	5.66714	5.89025	5.26397	5.72936	5.7767	5.70148	7.24949	7.23116	7.21622	5.12158	5.43168	5.36093	5.59065	5.40951	5.6338	5.56549	5.54507	5.69179	5.61218	5.46522	5.75851	NM_020311 // ENST00000272928 // BC036661 // ENST00000447924	CXCR7	chemokine (C-X-C motif) receptor 7	57007
16654391	-0.0289884	0.9879	-0.420722	0.727566	0.209088	0.658033	-0.182645	0.804158	-0.818738	0.0131762	-0.223955	0.834075	-0.145768	0.848119	0.449016	0.205796	0.447796	0.385288	0.0929406	0.956225		6.58786	6.44721	6.54327	6.679	6.4223	6.60127	6.45733	6.02753	6.22321	7.82058	7.9451	7.91249	7.09541	7.46151	7.36801	6.90985	7.34092	7.1238	7.27714	7.21472	7.20859	7.39861	7.64677	7.68574	NM_001037343 // NM_003159 // ENST00000379989 // ENST00000379996 // AY217744 // ENST00000463994	CDKL5	cyclin-dependent kinase-like 5	6792
16766719	0.058041	0.925914	-0.0994197	0.857806	0.304601	0.0622451	0.14714	0.539376	-0.818701	2.24194e-06	-0.185998	0.533239	0.0589832	0.856294	0.691686	2.06796e-05	0.142351	0.578685	-0.103267	0.84693		10.1579	10.0949	10.1163	10.1725	10.1819	10.1968	10.1241	10.128	10.0331	9.24549	9.38222	9.19466	10.1147	10.251	10.1671	10.167	10.2484	10.209	10.1062	10.2705	10.1616	10.0371	10.013	9.98251	NM_014825 // ENST00000382751	URB1	URB1 ribosome biogenesis 1 homolog (S. cerevisiae)	9875
16794555	-0.0228592	0.97675	0.0560701	0.9364	-0.0687858	0.762991	0.0101435	0.981543	-0.817989	6.42769e-06	-0.467064	0.018068	-0.194484	0.412249	0.156441	0.363404	0.00706577	0.989597	-0.118633	0.834297		10.6936	10.6388	10.6456	10.7435	10.649	10.7108	10.6896	10.7591	10.7734	10.0397	9.79289	9.80729	10.6316	10.646	10.6414	10.6202	10.5567	10.6489	10.6397	10.556	10.6067	10.1562	10.0717	10.198	NM_002668 // ENST00000376327 // L09604 // ENST00000376322	PLP2	proteolipid protein 2 (colonic epithelium-enriched)	5355
16787532	0.0560325	0.956137	-0.211959	0.786459	0.291664	0.256758	0.0236717	0.968244	-0.815991	0.000258043	-0.24733	0.606611	-1.07404	3.93341e-05	-0.505381	0.0169056	1.1309	2.20687e-05	-0.234806	0.68921		9.0771	8.9161	8.95926	9.13419	9.06129	9.17949	9.23365	9.1725	9.23784	8.52297	8.39164	8.35022	9.05091	9.23466	9.08739	9.07773	9.20438	9.13931	9.16263	9.18981	9.16532	9.30193	9.30748	9.26756	NM_005505 // NM_001082959 // ENST00000261693 // ENST00000415380 // AB209436 // ENST00000339570 // ENST00000376788	SCARB1	scavenger receptor class B, member 1	949
16864059	0.0465504	0.92636	0.034216	0.951158	0.00581177	0.979281	-0.00652269	0.9845	-0.815937	1.42946e-07	-0.306885	0.0438801	-0.0244729	0.937974	0.484579	0.000107952	0.143954	0.432585	0.11367	0.741601		10.9702	10.9699	10.8726	10.938	10.934	10.9159	10.9164	10.9293	10.8237	10.1391	10.066	10.1712	10.9304	11.0292	10.9445	10.9043	10.9813	11.0031	10.8251	10.9428	10.8988	10.7874	10.7876	10.8727	NM_020162 // ENST00000225296 // AK295760 // ENST00000457531 // ENST00000433302	DHX33	DEAH (Asp-Glu-Ala-His) box polypeptide 33	56919
16656527	-0.00728587	0.997284	-0.676657	0.693005	0.166279	0.817867	-0.503092	0.516845	-0.815528	0.0811463	0.0790953	0.970536	-0.011364	0.994711	0.883259	0.0614652	-0.14817	0.910595	-0.325813	0.857824		8.32995	8.38053	8.42583	8.37405	8.36951	8.51519	8.15338	8.12043	8.11445	7.89093	7.54279	7.81844	8.0122	7.80317	7.87572	8.02755	7.88293	7.72411	9.03649	8.72152	8.62504	9.40141	9.40533	9.08938	NM_001145204 // NM_001145205 // ENST00000424107 // ENST00000423335 // AK299610 // ENST00000482916	SHISA9	shisa homolog 9 (Xenopus laevis)	729993
16877888	-0.0105132	0.985698	-0.0409029	0.931953	-0.132626	0.303549	-0.163015	0.274411	-0.815006	4.24509e-08	-0.0746778	0.817789	0.0769922	0.700959	0.817321	4.20825e-08	-0.149141	0.337117	0.0604766	0.890763		8.26559	7.96376	7.91128	7.92719	8.02904	8.0866	7.57439	7.41582	7.69132	8.98082	8.48337	8.50239	7.37141	7.41409	7.4748	7.109	7.76924	7.32613	6.29203	6.6254	6.56764	5.34504	6.02572	6.33511
16989863	0.227711	0.818851	0.280098	0.773761	0.0267594	0.957146	0.0791459	0.908035	-0.81419	0.00236661	-0.329635	0.569101	0.167292	0.754506	0.651848	0.0142009	-0.251616	0.612545	-0.111083	0.931236		8.10286	7.95695	8.06047	8.11523	7.98553	8.00289	7.94117	8.03003	7.99605	8.96109	9.02956	8.96317	8.21284	8.19393	8.2464	7.982	8.13677	8.04758	7.89647	8.23307	7.99028	8.42458	8.38946	8.43457	NM_003141 // ENST00000254436 // BC010861	TRIM21	tripartite motif-containing 21	6737
17095587	0.0213283	0.958312	0.0319251	0.934221	0.232891	0.0155342	0.243488	0.0135107	-0.812735	2.12222e-09	-0.209082	0.072544	-0.908092	1.09203e-09	-0.304438	0.000567636	0.682909	8.43302e-08	-0.458074	7.35656e-05		8.60865	8.52033	8.58276	8.62458	8.55364	8.68142	8.6771	8.72036	8.73764	9.5483	9.43028	9.52552	8.92125	8.92282	8.79125	8.92172	8.83488	8.84332	8.92984	8.92075	8.83475	9.14559	9.15067	9.06416	NM_002569 // ENST00000268171 // BC012181	FURIN	furin (paired basic amino acid cleaving enzyme)	5045
16775778	0.105937	0.921631	-0.158323	0.871527	-0.0025579	0.995859	-0.266818	0.516329	-0.812457	0.001248	-0.172304	0.82257	-0.1608	0.743596	0.479353	0.0549501	0.136615	0.81942	-0.0216276	0.991564		7.44006	7.41438	7.58343	7.18644	7.45614	7.33406	7.44368	7.43988	7.4262	7.05249	6.95283	7.12648	8.49396	8.49302	8.46778	8.69377	8.37108	8.55972	8.17547	8.03168	8.14357	8.44393	8.19798	8.16086	NM_003974 // ENST00000276420 // BC032623 // ENST00000517422 // ENST00000524001 // ENST00000522011 // ENST00000521910	DOK2	docking protein 2, 56kDa	9046
16863104	-0.0530735	0.910025	-0.0166552	0.978991	-0.0165871	0.931828	0.0198312	0.946071	-0.810489	8.80933e-08	-0.152328	0.494141	-0.0148633	0.962357	0.643297	2.11596e-06	-0.160555	0.316176	-0.158831	0.52282		7.08899	7.06494	7.12962	7.09376	6.91637	6.78259	7.21544	7.2379	7.13709	8.38586	8.35588	8.25389	6.93359	7.24179	7.20009	7.14299	6.98925	6.97484	7.25651	7.24714	7.20176	7.38553	7.26645	7.31023	NM_025231 // ENST00000340487 // BC004255	ZSCAN16 // ZNF435	zinc finger and SCAN domain containing 16	80345
17111008	0.0984121	0.85735	-0.151449	0.757024	0.0551846	0.788026	-0.194677	0.330133	-0.81038	1.45198e-06	-0.34336	0.0633684	-0.00284591	0.995234	0.464174	0.000944968	0.215246	0.257629	0.157216	0.667699		7.08396	6.9276	6.97671	7.01864	7.0249	7.07594	7.70281	7.56126	7.61862	6.67642	6.53684	6.59192	7.0678	6.86754	6.93383	7.177	6.95183	6.93236	7.15752	7.22914	7.15009	7.25753	7.20204	7.07924	NM_014392 // NM_001040101 // ENST00000421177 // ENST00000513555 // ENST00000397958 // ENST00000513829 // ENST00000506380 // ENST00000433139 // ENST00000505246 // AK094573 // ENST00000504347	D4S234E // NSG1	DNA segment on chromosome 4 (unique) 234 expressed sequence // NULL	27065
16650337	-0.185731	0.892689	-0.578038	0.653648	0.421613	0.294148	0.029306	0.975086	-0.809657	0.0123299	-0.266562	0.771586	0.0566737	0.949701	0.599768	0.0710474	0.200933	0.790353	-0.164007	0.911364		8.49247	8.39071	8.42336	8.50861	8.35885	8.43036	8.28009	8.25238	8.31353	9.04185	9.02324	9.08762	8.32582	8.39227	8.39436	8.35656	8.28351	8.31734	8.27119	8.42102	8.36771	8.32742	8.42704	8.34014
16740778	0.111996	0.800845	0.147517	0.735331	0.299049	0.0333624	0.33457	0.0203927	-0.809423	4.04009e-07	-0.13376	0.643551	0.0779892	0.75161	0.753652	1.12469e-06	0.159202	0.407902	-0.0618584	0.910603		8.49247	8.39071	8.42336	8.50861	8.35885	8.43036	8.28009	8.25238	8.31353	9.04185	9.02324	9.08762	8.32582	8.39227	8.39436	8.35656	8.28351	8.31734	8.27119	8.42102	8.36771	8.32742	8.42704	8.34014
16992324	-0.0510766	0.969606	-0.0405123	0.978991	-0.0419904	0.927331	-0.0314261	0.965669	-0.808305	0.00229318	-0.116675	0.906826	0.113626	0.850231	0.805256	0.00258646	-0.146307	0.818016	0.00930886	0.997027		6.22099	6.25392	6.22946	6.04694	6.30083	6.29615	6.29681	6.25935	6.25799	6.11679	6.43772	6.21728	7.17581	7.55223	7.22448	7.18027	7.19247	7.20447	7.17635	7.18258	7.0777	7.44497	7.58495	7.57058
16651561	-0.0291886	0.985704	-0.0229189	0.989125	0.213174	0.592383	0.219443	0.703353	-0.807484	0.00554319	-0.00736627	0.997189	-0.165082	0.788626	0.635037	0.0299448	0.12059	0.873919	-0.257665	0.793921		7.60977	7.53018	7.53498	7.93179	7.13938	7.45211	10.4852	10.2464	10.1507	7.90227	7.37796	7.0027	9.89542	10.4013	10.3917	9.80283	10.3243	10.3638	9.29638	9.09684	9.20699	8.84471	8.70813	8.66361	NM_181533 // NM_181814 // ENST00000395752 // ENST00000353130 // AY311396 // ENST00000337334	ABHD12B	abhydrolase domain containing 12B	145447
16978525	0.0908356	0.786863	-0.0644918	0.859704	0.153725	0.164647	-0.00160199	0.995781	-0.807035	9.8853e-09	-0.0863099	0.727763	0.025716	0.915232	0.746441	3.08274e-08	0.229589	0.0376187	0.10158	0.701545		9.13956	9.17688	9.29328	9.35712	9.24107	9.1938	9.27991	9.4895	9.36869	10.3519	10.5628	10.4818	9.53503	9.64693	9.61909	9.30813	9.48059	9.58144	9.59038	9.71002	9.61935	9.88161	9.97514	10.0034	NM_017654 // NM_001193307 // ENST00000379958 // AF445355 // ENST00000446617	SAMD9	sterile alpha motif domain containing 9	54809
17097052	-0.0339402	0.949755	-0.0564054	0.902531	-0.0637784	0.694518	-0.0862436	0.694338	-0.806953	1.3294e-07	-0.132198	0.604846	0.135474	0.44768	0.810229	1.30635e-07	-0.0296849	0.928961	0.169568	0.493565		9.20318	8.9846	8.76725	9.5078	9.14303	9.08829	10.3104	10.3795	10.1901	8.57637	8.24811	8.14705	10.8794	9.85439	10.0622	10.6176	10.2036	9.97057	11.4277	11.1085	11.0859	11.4088	11.1729	11.1347
17028307	-0.0116154	0.995628	0.0374682	0.987515	-0.409288	0.446328	-0.360205	0.639544	-0.806704	0.0519124	-0.29315	0.821154	-0.00975367	0.994797	0.503801	0.265068	-0.161602	0.88461	0.237933	0.893456		7.50864	7.46451	7.54342	7.77291	7.64125	7.7406	8.55317	8.57991	8.52447	6.64499	6.9831	7.05385	8.35773	8.10862	7.94647	8.41681	8.11916	8.05642	8.48443	8.18111	8.09277	7.85336	7.80048	7.67947	NM_005231 // NM_138565 // NM_001184740 // ENST00000301843 // BC008799 // ENST00000376561 // ENST00000498223 // ENST00000483662	CTTN	cortactin	2017
[truncated: 51,090 more rows]
[truncated: 3 more columns]

## Sheet: Legend
	Lane A to U: S1 table lists the log2-fold change and adjusted P value for each comparison
[truncated: 29 more rows]
